# Supplementary material for: Transcriptomic insights into grain size development in naked barley (Hordeum vulgare L. var. nudum Hook. f): based on weighted gene co-expression network analysis
Source: PeerJ. 2025 Aug 8;13:e19856. doi: 10.7717/peerj.19856 (PMC12338054; doi:10.7717/peerj.19856)
Supplement: Supplemental Information 1 [file peerj-13-19856-s001.xlsx]

## Sheet: Sheet1
Supplementary table 1 qRT-PCR Primers for 7 hub genes
Gene id	Forward Primer 5’-3’	Reverse Primer 5’-3’
HORVU.MOREX.r3.2HG0142030	CGCTCGACATGTTCCCAGAG	TCAATGGCCGAACCTTCCTC
HORVU.MOREX.r3.2HG0191620	GCAACACTGCTGTGAAGGC	TTGTTATACGCCTGCGACGA
HORVU.MOREX.r3.2HG0131510	TTTGACGAAGCCTCCTGTGT	GTTGACGAGCGCTAGAAGGA
HORVU.MOREX.r3.1HG0049040	GAACATCGCCGCAGAGGAG	CCGGCGATGGAGTTCTTGAT
HORVU.MOREX.r3.7HG0675510	ATGGCGACCATCAAAGCCAA	GTCGTCGCCTTCTGTACCTT
HORVU.MOREX.r3.7HG0647190	AGCCGTCAGTATGTCCAAGC	TCGGCAATGAAGGTGTCCTC
HORVU.MOREX.r3.7HG0637810	CCAAGGCGTCGGAGAAGG	CCTGGTGCAGCTCCATCTTT
