# Supplementary material for: Transcriptomic insights into grain size development in naked barley (Hordeum vulgare L. var. nudum Hook. f): based on weighted gene co-expression network analysis
Source: PeerJ. 2025 Aug 8;13:e19856. doi: 10.7717/peerj.19856 (PMC12338054; doi:10.7717/peerj.19856)
Supplement: Supplemental Information 2 — S: Shenglibai; L: Lalu Qingke; 1, 2, and 3 represent the early, middle, and late periods of grain filling, respectively. [file peerj-13-19856-s002.xlsx]

## Sheet: Sheet1
Supplementary table 2 RNA quality assessment
name	mass concentration (ng/μL)	A260/280	25S/18S	RIN
L_early_1	154.9	2.07	1.9	9.4
L_early_2	34.1	2.15	2.3	7.8
L_early_3	159.9	2.16	2.4	7.8
L_mid_1	45.1	1.87	1.9	9.5
L_mid_2	83.5	2.16	2.6	8.4
L_mid_3	111.4	2.18	2.1	7.8
L_late_1	70.1	2.21	1.6	9.2
L_late_2	168.3	2.18	1.9	9.2
L_late_3	100.5	2.18	2.2	8.9
S_early_1	202.7	2.18	1.7	7.2
S_early_2	165.9	2.16	1.8	7.2
S_early_3	107.5	2.17	1.3	6.5
S_mid_1	116.5	2.06	1.8	9.3
S_mid_2	341.5	2.16	1.9	8.3
S_mid_3	109.5	2.19	2.2	9.6
S_late_1	177.5	2.15	1.9	9.2
S_late_2	124.1	2.21	1.7	9
S_late_3	474.4	2.14	2.4	9.2
Note S:Shenglibai; L:Lalu Qingke
