# Supplementary material for: Transcriptomic insights into grain size development in naked barley (Hordeum vulgare L. var. nudum Hook. f): based on weighted gene co-expression network analysis
Source: PeerJ. 2025 Aug 8;13:e19856. doi: 10.7717/peerj.19856 (PMC12338054; doi:10.7717/peerj.19856)
Supplement: Supplemental Information 3 — S: Shenglibai; L: Lalu Qingke; 1, 2, and 3 represent the early, middle, and late periods of grain filling, respectively. [file peerj-13-19856-s003.xlsx]

## Sheet: Sheet1
Supplementary table 3 Sequencing data statistics
Sample	RawReads(M)	RawBases(G)	CleanReads(M)	CleanBases(G)	ValidBases(%)	Q30(%)	GC(%)
S_early_1	48.7	6.97	45.77	6.55	93.98	95.39	49.73
S_early_2	51.05	7.31	47.94	6.86	93.9	94.87	49.69
S_early_3	50.66	7.23	47.37	6.76	93.51	95.22	49.76
S_mid_1	52.21	7.47	48.81	6.98	93.48	94.36	49.41
S_mid_2	50.06	7.19	47.05	6.76	94	94.08	49.38
S_mid_3	50	7.19	47.05	6.76	94.1	94.36	49.44
S_late_1	50.35	7.27	47.59	6.88	94.52	94.02	49.35
S_late_2	51.99	7.46	48.7	6.98	93.67	94.25	49.38
S_late_3	51.16	7.36	48.18	6.94	94.18	94.07	49.34
L_early_1	49.55	7.21	47.39	6.89	95.65	95.32	50.48
L_early_2	50.05	7.21	47.38	6.82	94.68	95.62	50.48
L_early_3	49.03	7.06	46.36	6.67	94.56	95.66	50.56
L_mid_1	48.7	7.02	46.06	6.64	94.58	94.54	50.25
L_mid_2	51.09	7.35	48.19	6.94	94.32	94.77	50.24
L_mid_3	47.65	6.85	44.86	6.45	94.15	95.14	50.37
L_late_1	51.17	7.34	47.95	6.88	93.71	94.31	49.9
L_late_2	47.05	6.76	44.18	6.35	93.92	94.2	49.82
L_late_3	51.44	7.45	48.73	7.06	94.74	94.18	50.02
Note S:Shenglibai; L:Lalu Qingke.
