# Supplementary material for: Transcriptomic insights into grain size development in naked barley (Hordeum vulgare L. var. nudum Hook. f): based on weighted gene co-expression network analysis
Source: PeerJ. 2025 Aug 8;13:e19856. doi: 10.7717/peerj.19856 (PMC12338054; doi:10.7717/peerj.19856)
Supplement: Supplemental Information 4 [file peerj-13-19856-s004.xlsx]

## Sheet: Sheet1
Supplementary Table 4 The totality of genes
Gene ID
HORVU.MOREX.r3.1HG0000030	HORVU.MOREX.r3.7HG0654360	HORVU.MOREX.r3.5HG0534920	HORVU.MOREX.r3.4HG0398740	HORVU.MOREX.r3.3HG0288080	HORVU.MOREX.r3.2HG0164260	HORVU.MOREX.r3.2HG0135110
HORVU.MOREX.r3.1HG0000040	HORVU.MOREX.r3.7HG0654370	HORVU.MOREX.r3.5HG0534930	HORVU.MOREX.r3.4HG0398750	HORVU.MOREX.r3.3HG0288140	HORVU.MOREX.r3.2HG0164300	HORVU.MOREX.r3.2HG0135120
HORVU.MOREX.r3.1HG0000050	HORVU.MOREX.r3.7HG0654390	HORVU.MOREX.r3.5HG0534940	HORVU.MOREX.r3.4HG0398760	HORVU.MOREX.r3.3HG0288170	HORVU.MOREX.r3.2HG0164310	HORVU.MOREX.r3.2HG0135150
HORVU.MOREX.r3.1HG0000060	HORVU.MOREX.r3.7HG0654400	HORVU.MOREX.r3.5HG0534950	HORVU.MOREX.r3.4HG0398790	HORVU.MOREX.r3.3HG0288230	HORVU.MOREX.r3.2HG0164330	HORVU.MOREX.r3.2HG0135170
HORVU.MOREX.r3.1HG0000070	HORVU.MOREX.r3.7HG0654410	HORVU.MOREX.r3.5HG0534960	HORVU.MOREX.r3.4HG0398810	HORVU.MOREX.r3.3HG0288240	HORVU.MOREX.r3.2HG0164340	HORVU.MOREX.r3.2HG0135210
HORVU.MOREX.r3.1HG0000080	HORVU.MOREX.r3.7HG0654430	HORVU.MOREX.r3.5HG0534970	HORVU.MOREX.r3.4HG0398820	HORVU.MOREX.r3.3HG0288250	HORVU.MOREX.r3.2HG0164370	HORVU.MOREX.r3.2HG0135240
HORVU.MOREX.r3.1HG0000090	HORVU.MOREX.r3.7HG0654440	HORVU.MOREX.r3.5HG0534980	HORVU.MOREX.r3.4HG0398840	HORVU.MOREX.r3.3HG0288270	HORVU.MOREX.r3.2HG0164400	HORVU.MOREX.r3.2HG0135250
HORVU.MOREX.r3.1HG0000110	HORVU.MOREX.r3.7HG0654450	HORVU.MOREX.r3.5HG0534990	HORVU.MOREX.r3.4HG0398850	HORVU.MOREX.r3.3HG0288280	HORVU.MOREX.r3.2HG0164410	HORVU.MOREX.r3.2HG0135260
HORVU.MOREX.r3.1HG0000130	HORVU.MOREX.r3.7HG0654460	HORVU.MOREX.r3.5HG0535000	HORVU.MOREX.r3.4HG0398860	HORVU.MOREX.r3.3HG0288320	HORVU.MOREX.r3.2HG0164420	HORVU.MOREX.r3.2HG0135300
HORVU.MOREX.r3.1HG0000140	HORVU.MOREX.r3.7HG0654480	HORVU.MOREX.r3.5HG0535010	HORVU.MOREX.r3.4HG0398870	HORVU.MOREX.r3.3HG0288330	HORVU.MOREX.r3.2HG0164440	HORVU.MOREX.r3.2HG0135310
HORVU.MOREX.r3.1HG0000210	HORVU.MOREX.r3.7HG0654490	HORVU.MOREX.r3.5HG0535020	HORVU.MOREX.r3.4HG0398890	HORVU.MOREX.r3.3HG0288340	HORVU.MOREX.r3.2HG0164450	HORVU.MOREX.r3.2HG0135320
HORVU.MOREX.r3.1HG0000220	HORVU.MOREX.r3.7HG0654500	HORVU.MOREX.r3.5HG0535060	HORVU.MOREX.r3.4HG0398900	HORVU.MOREX.r3.3HG0288360	HORVU.MOREX.r3.2HG0164470	HORVU.MOREX.r3.2HG0135360
HORVU.MOREX.r3.1HG0000230	HORVU.MOREX.r3.7HG0654510	HORVU.MOREX.r3.5HG0535070	HORVU.MOREX.r3.4HG0398910	HORVU.MOREX.r3.3HG0288370	HORVU.MOREX.r3.2HG0164490	HORVU.MOREX.r3.2HG0135380
HORVU.MOREX.r3.1HG0000240	HORVU.MOREX.r3.7HG0654530	HORVU.MOREX.r3.5HG0535110	HORVU.MOREX.r3.4HG0398920	HORVU.MOREX.r3.3HG0288380	HORVU.MOREX.r3.2HG0164510	HORVU.MOREX.r3.2HG0135400
HORVU.MOREX.r3.1HG0000250	HORVU.MOREX.r3.7HG0654540	HORVU.MOREX.r3.5HG0535120	HORVU.MOREX.r3.4HG0398930	HORVU.MOREX.r3.3HG0288410	HORVU.MOREX.r3.2HG0164530	HORVU.MOREX.r3.2HG0135420
HORVU.MOREX.r3.1HG0000260	HORVU.MOREX.r3.7HG0654580	HORVU.MOREX.r3.5HG0535130	HORVU.MOREX.r3.4HG0398940	HORVU.MOREX.r3.3HG0288420	HORVU.MOREX.r3.2HG0164540	HORVU.MOREX.r3.2HG0135490
HORVU.MOREX.r3.1HG0000270	HORVU.MOREX.r3.7HG0654590	HORVU.MOREX.r3.5HG0535140	HORVU.MOREX.r3.4HG0398950	HORVU.MOREX.r3.3HG0288450	HORVU.MOREX.r3.2HG0164550	HORVU.MOREX.r3.2HG0135500
HORVU.MOREX.r3.1HG0000280	HORVU.MOREX.r3.7HG0654600	HORVU.MOREX.r3.5HG0535150	HORVU.MOREX.r3.4HG0398960	HORVU.MOREX.r3.3HG0288470	HORVU.MOREX.r3.2HG0164630	HORVU.MOREX.r3.2HG0135510
HORVU.MOREX.r3.1HG0000290	HORVU.MOREX.r3.7HG0654620	HORVU.MOREX.r3.5HG0535170	HORVU.MOREX.r3.4HG0398970	HORVU.MOREX.r3.3HG0288480	HORVU.MOREX.r3.2HG0164650	HORVU.MOREX.r3.2HG0135530
HORVU.MOREX.r3.1HG0000340	HORVU.MOREX.r3.7HG0654660	HORVU.MOREX.r3.5HG0535180	HORVU.MOREX.r3.4HG0398980	HORVU.MOREX.r3.3HG0288500	HORVU.MOREX.r3.2HG0164700	HORVU.MOREX.r3.2HG0135580
HORVU.MOREX.r3.1HG0000350	HORVU.MOREX.r3.7HG0654670	HORVU.MOREX.r3.5HG0535190	HORVU.MOREX.r3.4HG0398990	HORVU.MOREX.r3.3HG0288510	HORVU.MOREX.r3.2HG0164730	HORVU.MOREX.r3.2HG0135630
HORVU.MOREX.r3.1HG0000360	HORVU.MOREX.r3.7HG0654690	HORVU.MOREX.r3.5HG0535200	HORVU.MOREX.r3.4HG0399010	HORVU.MOREX.r3.3HG0288520	HORVU.MOREX.r3.2HG0164750	HORVU.MOREX.r3.2HG0135650
HORVU.MOREX.r3.1HG0000370	HORVU.MOREX.r3.7HG0654710	HORVU.MOREX.r3.5HG0535210	HORVU.MOREX.r3.4HG0399030	HORVU.MOREX.r3.3HG0288540	HORVU.MOREX.r3.2HG0164760	HORVU.MOREX.r3.2HG0135660
HORVU.MOREX.r3.1HG0000380	HORVU.MOREX.r3.7HG0654720	HORVU.MOREX.r3.5HG0535220	HORVU.MOREX.r3.4HG0399060	HORVU.MOREX.r3.3HG0288570	HORVU.MOREX.r3.2HG0164770	HORVU.MOREX.r3.2HG0135680
HORVU.MOREX.r3.1HG0000390	HORVU.MOREX.r3.7HG0654740	HORVU.MOREX.r3.5HG0535240	HORVU.MOREX.r3.4HG0399080	HORVU.MOREX.r3.3HG0288580	HORVU.MOREX.r3.2HG0164790	HORVU.MOREX.r3.2HG0135690
HORVU.MOREX.r3.1HG0000400	HORVU.MOREX.r3.7HG0654760	HORVU.MOREX.r3.5HG0535280	HORVU.MOREX.r3.4HG0399090	HORVU.MOREX.r3.3HG0288590	HORVU.MOREX.r3.2HG0164800	HORVU.MOREX.r3.2HG0135740
HORVU.MOREX.r3.1HG0000410	HORVU.MOREX.r3.7HG0654770	HORVU.MOREX.r3.5HG0535310	HORVU.MOREX.r3.4HG0399110	HORVU.MOREX.r3.3HG0288610	HORVU.MOREX.r3.2HG0164840	HORVU.MOREX.r3.2HG0135760
HORVU.MOREX.r3.1HG0000420	HORVU.MOREX.r3.7HG0654800	HORVU.MOREX.r3.5HG0535330	HORVU.MOREX.r3.4HG0399140	HORVU.MOREX.r3.3HG0288620	HORVU.MOREX.r3.2HG0164850	HORVU.MOREX.r3.2HG0135780
HORVU.MOREX.r3.1HG0000430	HORVU.MOREX.r3.7HG0654810	HORVU.MOREX.r3.5HG0535350	HORVU.MOREX.r3.4HG0399190	HORVU.MOREX.r3.3HG0288650	HORVU.MOREX.r3.2HG0164880	HORVU.MOREX.r3.2HG0135800
HORVU.MOREX.r3.1HG0000440	HORVU.MOREX.r3.7HG0654820	HORVU.MOREX.r3.5HG0535360	HORVU.MOREX.r3.4HG0399210	HORVU.MOREX.r3.3HG0288660	HORVU.MOREX.r3.2HG0164950	HORVU.MOREX.r3.2HG0135830
HORVU.MOREX.r3.1HG0000450	HORVU.MOREX.r3.7HG0654830	HORVU.MOREX.r3.5HG0535370	HORVU.MOREX.r3.4HG0399220	HORVU.MOREX.r3.3HG0288670	HORVU.MOREX.r3.2HG0164970	HORVU.MOREX.r3.2HG0135860
HORVU.MOREX.r3.1HG0000460	HORVU.MOREX.r3.7HG0654840	HORVU.MOREX.r3.5HG0535380	HORVU.MOREX.r3.4HG0399240	HORVU.MOREX.r3.3HG0288690	HORVU.MOREX.r3.2HG0164980	HORVU.MOREX.r3.2HG0135870
HORVU.MOREX.r3.1HG0000470	HORVU.MOREX.r3.7HG0654850	HORVU.MOREX.r3.5HG0535390	HORVU.MOREX.r3.4HG0399260	HORVU.MOREX.r3.3HG0288700	HORVU.MOREX.r3.2HG0165000	HORVU.MOREX.r3.2HG0135880
HORVU.MOREX.r3.1HG0000480	HORVU.MOREX.r3.7HG0654860	HORVU.MOREX.r3.5HG0535410	HORVU.MOREX.r3.4HG0399270	HORVU.MOREX.r3.3HG0288710	HORVU.MOREX.r3.2HG0165020	HORVU.MOREX.r3.2HG0135900
HORVU.MOREX.r3.1HG0000490	HORVU.MOREX.r3.7HG0654910	HORVU.MOREX.r3.5HG0535420	HORVU.MOREX.r3.4HG0399280	HORVU.MOREX.r3.3HG0288750	HORVU.MOREX.r3.2HG0165050	HORVU.MOREX.r3.2HG0135930
HORVU.MOREX.r3.1HG0000520	HORVU.MOREX.r3.7HG0654920	HORVU.MOREX.r3.5HG0535440	HORVU.MOREX.r3.4HG0399320	HORVU.MOREX.r3.3HG0288800	HORVU.MOREX.r3.2HG0165060	HORVU.MOREX.r3.2HG0135950
HORVU.MOREX.r3.1HG0000530	HORVU.MOREX.r3.7HG0654930	HORVU.MOREX.r3.5HG0535460	HORVU.MOREX.r3.4HG0399350	HORVU.MOREX.r3.3HG0288810	HORVU.MOREX.r3.2HG0165100	HORVU.MOREX.r3.2HG0135970
HORVU.MOREX.r3.1HG0000540	HORVU.MOREX.r3.7HG0654940	HORVU.MOREX.r3.5HG0535470	HORVU.MOREX.r3.4HG0399360	HORVU.MOREX.r3.3HG0288820	HORVU.MOREX.r3.2HG0165110	HORVU.MOREX.r3.2HG0135980
HORVU.MOREX.r3.1HG0000580	HORVU.MOREX.r3.7HG0654950	HORVU.MOREX.r3.5HG0535490	HORVU.MOREX.r3.4HG0399380	HORVU.MOREX.r3.3HG0288830	HORVU.MOREX.r3.2HG0165160	HORVU.MOREX.r3.2HG0136010
HORVU.MOREX.r3.1HG0000590	HORVU.MOREX.r3.7HG0654960	HORVU.MOREX.r3.5HG0535510	HORVU.MOREX.r3.4HG0399430	HORVU.MOREX.r3.3HG0288840	HORVU.MOREX.r3.2HG0165190	HORVU.MOREX.r3.2HG0136030
HORVU.MOREX.r3.1HG0000600	HORVU.MOREX.r3.7HG0655010	HORVU.MOREX.r3.5HG0535530	HORVU.MOREX.r3.4HG0399440	HORVU.MOREX.r3.3HG0288860	HORVU.MOREX.r3.2HG0165200	HORVU.MOREX.r3.2HG0136040
HORVU.MOREX.r3.1HG0000610	HORVU.MOREX.r3.7HG0655030	HORVU.MOREX.r3.5HG0535550	HORVU.MOREX.r3.4HG0399460	HORVU.MOREX.r3.3HG0288880	HORVU.MOREX.r3.2HG0165250	HORVU.MOREX.r3.2HG0136090
HORVU.MOREX.r3.1HG0000620	HORVU.MOREX.r3.7HG0655040	HORVU.MOREX.r3.5HG0535560	HORVU.MOREX.r3.4HG0399470	HORVU.MOREX.r3.3HG0288890	HORVU.MOREX.r3.2HG0165290	HORVU.MOREX.r3.2HG0136100
HORVU.MOREX.r3.1HG0000630	HORVU.MOREX.r3.7HG0655050	HORVU.MOREX.r3.5HG0535630	HORVU.MOREX.r3.4HG0399480	HORVU.MOREX.r3.3HG0288900	HORVU.MOREX.r3.2HG0165300	HORVU.MOREX.r3.2HG0136120
HORVU.MOREX.r3.1HG0000660	HORVU.MOREX.r3.7HG0655080	HORVU.MOREX.r3.5HG0535640	HORVU.MOREX.r3.4HG0399510	HORVU.MOREX.r3.3HG0288910	HORVU.MOREX.r3.2HG0165310	HORVU.MOREX.r3.2HG0136130
HORVU.MOREX.r3.1HG0000670	HORVU.MOREX.r3.7HG0655100	HORVU.MOREX.r3.5HG0535660	HORVU.MOREX.r3.4HG0399520	HORVU.MOREX.r3.3HG0288930	HORVU.MOREX.r3.2HG0165360	HORVU.MOREX.r3.2HG0136150
HORVU.MOREX.r3.1HG0000680	HORVU.MOREX.r3.7HG0655160	HORVU.MOREX.r3.5HG0535710	HORVU.MOREX.r3.4HG0399530	HORVU.MOREX.r3.3HG0288940	HORVU.MOREX.r3.2HG0165370	HORVU.MOREX.r3.2HG0136160
HORVU.MOREX.r3.1HG0000690	HORVU.MOREX.r3.7HG0655170	HORVU.MOREX.r3.5HG0535730	HORVU.MOREX.r3.4HG0399560	HORVU.MOREX.r3.3HG0288960	HORVU.MOREX.r3.2HG0165400	HORVU.MOREX.r3.2HG0136170
HORVU.MOREX.r3.1HG0000710	HORVU.MOREX.r3.7HG0655180	HORVU.MOREX.r3.5HG0535750	HORVU.MOREX.r3.4HG0399570	HORVU.MOREX.r3.3HG0288990	HORVU.MOREX.r3.2HG0165420	HORVU.MOREX.r3.2HG0136180
HORVU.MOREX.r3.1HG0000720	HORVU.MOREX.r3.7HG0655190	HORVU.MOREX.r3.5HG0535760	HORVU.MOREX.r3.4HG0399590	HORVU.MOREX.r3.3HG0289000	HORVU.MOREX.r3.2HG0165430	HORVU.MOREX.r3.2HG0136190
HORVU.MOREX.r3.1HG0000730	HORVU.MOREX.r3.7HG0655200	HORVU.MOREX.r3.5HG0535770	HORVU.MOREX.r3.4HG0399600	HORVU.MOREX.r3.3HG0289010	HORVU.MOREX.r3.2HG0165440	HORVU.MOREX.r3.2HG0136210
HORVU.MOREX.r3.1HG0000780	HORVU.MOREX.r3.7HG0655210	HORVU.MOREX.r3.5HG0535780	HORVU.MOREX.r3.4HG0399610	HORVU.MOREX.r3.3HG0289020	HORVU.MOREX.r3.2HG0165450	HORVU.MOREX.r3.2HG0136230
HORVU.MOREX.r3.1HG0000800	HORVU.MOREX.r3.7HG0655280	HORVU.MOREX.r3.5HG0535790	HORVU.MOREX.r3.4HG0399620	HORVU.MOREX.r3.3HG0289030	HORVU.MOREX.r3.2HG0165490	HORVU.MOREX.r3.2HG0136240
HORVU.MOREX.r3.1HG0000810	HORVU.MOREX.r3.7HG0655290	HORVU.MOREX.r3.5HG0535820	HORVU.MOREX.r3.4HG0399660	HORVU.MOREX.r3.3HG0289040	HORVU.MOREX.r3.2HG0165510	HORVU.MOREX.r3.2HG0136250
HORVU.MOREX.r3.1HG0000850	HORVU.MOREX.r3.7HG0655300	HORVU.MOREX.r3.5HG0535830	HORVU.MOREX.r3.4HG0399670	HORVU.MOREX.r3.3HG0289050	HORVU.MOREX.r3.2HG0165520	HORVU.MOREX.r3.2HG0136270
HORVU.MOREX.r3.1HG0000870	HORVU.MOREX.r3.7HG0655330	HORVU.MOREX.r3.5HG0535870	HORVU.MOREX.r3.4HG0399680	HORVU.MOREX.r3.3HG0289080	HORVU.MOREX.r3.2HG0165550	HORVU.MOREX.r3.2HG0136280
HORVU.MOREX.r3.1HG0000880	HORVU.MOREX.r3.7HG0655340	HORVU.MOREX.r3.5HG0535880	HORVU.MOREX.r3.4HG0399690	HORVU.MOREX.r3.3HG0289110	HORVU.MOREX.r3.2HG0165640	HORVU.MOREX.r3.2HG0136290
HORVU.MOREX.r3.1HG0000950	HORVU.MOREX.r3.7HG0655350	HORVU.MOREX.r3.5HG0535890	HORVU.MOREX.r3.4HG0399700	HORVU.MOREX.r3.3HG0289120	HORVU.MOREX.r3.2HG0165730	HORVU.MOREX.r3.2HG0136300
HORVU.MOREX.r3.1HG0000990	HORVU.MOREX.r3.7HG0655390	HORVU.MOREX.r3.5HG0535920	HORVU.MOREX.r3.4HG0399750	HORVU.MOREX.r3.3HG0289130	HORVU.MOREX.r3.2HG0165740	HORVU.MOREX.r3.2HG0136320
HORVU.MOREX.r3.1HG0001010	HORVU.MOREX.r3.7HG0655410	HORVU.MOREX.r3.5HG0535930	HORVU.MOREX.r3.4HG0399760	HORVU.MOREX.r3.3HG0289140	HORVU.MOREX.r3.2HG0165750	HORVU.MOREX.r3.2HG0136330
HORVU.MOREX.r3.1HG0001020	HORVU.MOREX.r3.7HG0655420	HORVU.MOREX.r3.5HG0535940	HORVU.MOREX.r3.4HG0399770	HORVU.MOREX.r3.3HG0289150	HORVU.MOREX.r3.2HG0165770	HORVU.MOREX.r3.2HG0136340
HORVU.MOREX.r3.1HG0001030	HORVU.MOREX.r3.7HG0655430	HORVU.MOREX.r3.5HG0535950	HORVU.MOREX.r3.4HG0399790	HORVU.MOREX.r3.3HG0289180	HORVU.MOREX.r3.2HG0165780	HORVU.MOREX.r3.2HG0136360
HORVU.MOREX.r3.1HG0001050	HORVU.MOREX.r3.7HG0655440	HORVU.MOREX.r3.5HG0535960	HORVU.MOREX.r3.4HG0399840	HORVU.MOREX.r3.3HG0289200	HORVU.MOREX.r3.2HG0165790	HORVU.MOREX.r3.2HG0136370
HORVU.MOREX.r3.1HG0001070	HORVU.MOREX.r3.7HG0655450	HORVU.MOREX.r3.5HG0535970	HORVU.MOREX.r3.4HG0399890	HORVU.MOREX.r3.3HG0289210	HORVU.MOREX.r3.2HG0165820	HORVU.MOREX.r3.2HG0136400
HORVU.MOREX.r3.1HG0001100	HORVU.MOREX.r3.7HG0655470	HORVU.MOREX.r3.5HG0535980	HORVU.MOREX.r3.4HG0399900	HORVU.MOREX.r3.3HG0289240	HORVU.MOREX.r3.2HG0165830	HORVU.MOREX.r3.2HG0136410
HORVU.MOREX.r3.1HG0001110	HORVU.MOREX.r3.7HG0655480	HORVU.MOREX.r3.5HG0536000	HORVU.MOREX.r3.4HG0399910	HORVU.MOREX.r3.3HG0289250	HORVU.MOREX.r3.2HG0165840	HORVU.MOREX.r3.2HG0136420
HORVU.MOREX.r3.1HG0001120	HORVU.MOREX.r3.7HG0655490	HORVU.MOREX.r3.5HG0536050	HORVU.MOREX.r3.4HG0399920	HORVU.MOREX.r3.3HG0289260	HORVU.MOREX.r3.2HG0165850	HORVU.MOREX.r3.2HG0136430
HORVU.MOREX.r3.1HG0001130	HORVU.MOREX.r3.7HG0655510	HORVU.MOREX.r3.5HG0536080	HORVU.MOREX.r3.4HG0399930	HORVU.MOREX.r3.3HG0289290	HORVU.MOREX.r3.2HG0165860	HORVU.MOREX.r3.2HG0136440
HORVU.MOREX.r3.1HG0001140	HORVU.MOREX.r3.7HG0655520	HORVU.MOREX.r3.5HG0536100	HORVU.MOREX.r3.4HG0399940	HORVU.MOREX.r3.3HG0289300	HORVU.MOREX.r3.2HG0165880	HORVU.MOREX.r3.2HG0136460
HORVU.MOREX.r3.1HG0001150	HORVU.MOREX.r3.7HG0655530	HORVU.MOREX.r3.5HG0536110	HORVU.MOREX.r3.4HG0399960	HORVU.MOREX.r3.3HG0289340	HORVU.MOREX.r3.2HG0165890	HORVU.MOREX.r3.2HG0136480
HORVU.MOREX.r3.1HG0001180	HORVU.MOREX.r3.7HG0655550	HORVU.MOREX.r3.5HG0536120	HORVU.MOREX.r3.4HG0399990	HORVU.MOREX.r3.3HG0289350	HORVU.MOREX.r3.2HG0165900	HORVU.MOREX.r3.2HG0136490
HORVU.MOREX.r3.1HG0001190	HORVU.MOREX.r3.7HG0655580	HORVU.MOREX.r3.5HG0536140	HORVU.MOREX.r3.4HG0400000	HORVU.MOREX.r3.3HG0289360	HORVU.MOREX.r3.2HG0165920	HORVU.MOREX.r3.2HG0136510
HORVU.MOREX.r3.1HG0001210	HORVU.MOREX.r3.7HG0655590	HORVU.MOREX.r3.5HG0536160	HORVU.MOREX.r3.4HG0400020	HORVU.MOREX.r3.3HG0289370	HORVU.MOREX.r3.2HG0165930	HORVU.MOREX.r3.2HG0136550
HORVU.MOREX.r3.1HG0001220	HORVU.MOREX.r3.7HG0655600	HORVU.MOREX.r3.5HG0536200	HORVU.MOREX.r3.4HG0400030	HORVU.MOREX.r3.3HG0289380	HORVU.MOREX.r3.2HG0165940	HORVU.MOREX.r3.2HG0136570
HORVU.MOREX.r3.1HG0001230	HORVU.MOREX.r3.7HG0655610	HORVU.MOREX.r3.5HG0536210	HORVU.MOREX.r3.4HG0400060	HORVU.MOREX.r3.3HG0289420	HORVU.MOREX.r3.2HG0165960	HORVU.MOREX.r3.2HG0136580
HORVU.MOREX.r3.1HG0001250	HORVU.MOREX.r3.7HG0655650	HORVU.MOREX.r3.5HG0536240	HORVU.MOREX.r3.4HG0400070	HORVU.MOREX.r3.3HG0289460	HORVU.MOREX.r3.2HG0165970	HORVU.MOREX.r3.2HG0136600
HORVU.MOREX.r3.1HG0001260	HORVU.MOREX.r3.7HG0655660	HORVU.MOREX.r3.5HG0536260	HORVU.MOREX.r3.4HG0400080	HORVU.MOREX.r3.3HG0289490	HORVU.MOREX.r3.2HG0165980	HORVU.MOREX.r3.2HG0136610
HORVU.MOREX.r3.1HG0001270	HORVU.MOREX.r3.7HG0655670	HORVU.MOREX.r3.5HG0536330	HORVU.MOREX.r3.4HG0400090	HORVU.MOREX.r3.3HG0289500	HORVU.MOREX.r3.2HG0166000	HORVU.MOREX.r3.2HG0136650
HORVU.MOREX.r3.1HG0001280	HORVU.MOREX.r3.7HG0655680	HORVU.MOREX.r3.5HG0536340	HORVU.MOREX.r3.4HG0400110	HORVU.MOREX.r3.3HG0289520	HORVU.MOREX.r3.2HG0166040	HORVU.MOREX.r3.2HG0136670
HORVU.MOREX.r3.1HG0001330	HORVU.MOREX.r3.7HG0655710	HORVU.MOREX.r3.5HG0536370	HORVU.MOREX.r3.4HG0400120	HORVU.MOREX.r3.3HG0289570	HORVU.MOREX.r3.2HG0166060	HORVU.MOREX.r3.2HG0136680
HORVU.MOREX.r3.1HG0001350	HORVU.MOREX.r3.7HG0655720	HORVU.MOREX.r3.5HG0536400	HORVU.MOREX.r3.4HG0400140	HORVU.MOREX.r3.3HG0289600	HORVU.MOREX.r3.2HG0166090	HORVU.MOREX.r3.2HG0136690
HORVU.MOREX.r3.1HG0001400	HORVU.MOREX.r3.7HG0655750	HORVU.MOREX.r3.5HG0536420	HORVU.MOREX.r3.4HG0400180	HORVU.MOREX.r3.3HG0289610	HORVU.MOREX.r3.2HG0166240	HORVU.MOREX.r3.2HG0136700
HORVU.MOREX.r3.1HG0001410	HORVU.MOREX.r3.7HG0655760	HORVU.MOREX.r3.5HG0536440	HORVU.MOREX.r3.4HG0400190	HORVU.MOREX.r3.3HG0289620	HORVU.MOREX.r3.2HG0166260	HORVU.MOREX.r3.2HG0136730
HORVU.MOREX.r3.1HG0001420	HORVU.MOREX.r3.7HG0655770	HORVU.MOREX.r3.5HG0536460	HORVU.MOREX.r3.4HG0400200	HORVU.MOREX.r3.3HG0289630	HORVU.MOREX.r3.2HG0166270	HORVU.MOREX.r3.2HG0136750
HORVU.MOREX.r3.1HG0001430	HORVU.MOREX.r3.7HG0655780	HORVU.MOREX.r3.5HG0536470	HORVU.MOREX.r3.4HG0400210	HORVU.MOREX.r3.3HG0289690	HORVU.MOREX.r3.2HG0166290	HORVU.MOREX.r3.2HG0136760
HORVU.MOREX.r3.1HG0001450	HORVU.MOREX.r3.7HG0655790	HORVU.MOREX.r3.5HG0536480	HORVU.MOREX.r3.4HG0400230	HORVU.MOREX.r3.3HG0289710	HORVU.MOREX.r3.2HG0166300	HORVU.MOREX.r3.2HG0136770
HORVU.MOREX.r3.1HG0001460	HORVU.MOREX.r3.7HG0655800	HORVU.MOREX.r3.5HG0536490	HORVU.MOREX.r3.4HG0400260	HORVU.MOREX.r3.3HG0289720	HORVU.MOREX.r3.2HG0166310	HORVU.MOREX.r3.2HG0136790
HORVU.MOREX.r3.1HG0001470	HORVU.MOREX.r3.7HG0655850	HORVU.MOREX.r3.5HG0536500	HORVU.MOREX.r3.4HG0400270	HORVU.MOREX.r3.3HG0289730	HORVU.MOREX.r3.2HG0166320	HORVU.MOREX.r3.2HG0136820
HORVU.MOREX.r3.1HG0001480	HORVU.MOREX.r3.7HG0655860	HORVU.MOREX.r3.5HG0536540	HORVU.MOREX.r3.4HG0400300	HORVU.MOREX.r3.3HG0289760	HORVU.MOREX.r3.2HG0166330	HORVU.MOREX.r3.2HG0136830
HORVU.MOREX.r3.1HG0001490	HORVU.MOREX.r3.7HG0655870	HORVU.MOREX.r3.5HG0536550	HORVU.MOREX.r3.4HG0400320	HORVU.MOREX.r3.3HG0289770	HORVU.MOREX.r3.2HG0166360	HORVU.MOREX.r3.2HG0136840
HORVU.MOREX.r3.1HG0001510	HORVU.MOREX.r3.7HG0655880	HORVU.MOREX.r3.5HG0536560	HORVU.MOREX.r3.4HG0400330	HORVU.MOREX.r3.3HG0289780	HORVU.MOREX.r3.2HG0166370	HORVU.MOREX.r3.2HG0136850
HORVU.MOREX.r3.1HG0001530	HORVU.MOREX.r3.7HG0655890	HORVU.MOREX.r3.5HG0536570	HORVU.MOREX.r3.4HG0400340	HORVU.MOREX.r3.3HG0289790	HORVU.MOREX.r3.2HG0166410	HORVU.MOREX.r3.2HG0136860
HORVU.MOREX.r3.1HG0001540	HORVU.MOREX.r3.7HG0655900	HORVU.MOREX.r3.5HG0536610	HORVU.MOREX.r3.4HG0400350	HORVU.MOREX.r3.3HG0289810	HORVU.MOREX.r3.2HG0166450	HORVU.MOREX.r3.2HG0136870
HORVU.MOREX.r3.1HG0001550	HORVU.MOREX.r3.7HG0655910	HORVU.MOREX.r3.5HG0536630	HORVU.MOREX.r3.4HG0400380	HORVU.MOREX.r3.3HG0289840	HORVU.MOREX.r3.2HG0166550	HORVU.MOREX.r3.2HG0136880
HORVU.MOREX.r3.1HG0001560	HORVU.MOREX.r3.7HG0655930	HORVU.MOREX.r3.5HG0536690	HORVU.MOREX.r3.4HG0400410	HORVU.MOREX.r3.3HG0289860	HORVU.MOREX.r3.2HG0166570	HORVU.MOREX.r3.2HG0136890
HORVU.MOREX.r3.1HG0001570	HORVU.MOREX.r3.7HG0655950	HORVU.MOREX.r3.5HG0536710	HORVU.MOREX.r3.4HG0400520	HORVU.MOREX.r3.3HG0289900	HORVU.MOREX.r3.2HG0166590	HORVU.MOREX.r3.2HG0136930
HORVU.MOREX.r3.1HG0001580	HORVU.MOREX.r3.7HG0655960	HORVU.MOREX.r3.5HG0536720	HORVU.MOREX.r3.4HG0400580	HORVU.MOREX.r3.3HG0289910	HORVU.MOREX.r3.2HG0166630	HORVU.MOREX.r3.2HG0136950
HORVU.MOREX.r3.1HG0001590	HORVU.MOREX.r3.7HG0655970	HORVU.MOREX.r3.5HG0536730	HORVU.MOREX.r3.4HG0400610	HORVU.MOREX.r3.3HG0289920	HORVU.MOREX.r3.2HG0166670	HORVU.MOREX.r3.2HG0136960
HORVU.MOREX.r3.1HG0001600	HORVU.MOREX.r3.7HG0655990	HORVU.MOREX.r3.5HG0536740	HORVU.MOREX.r3.4HG0400620	HORVU.MOREX.r3.3HG0289930	HORVU.MOREX.r3.2HG0166680	HORVU.MOREX.r3.2HG0136970
HORVU.MOREX.r3.1HG0001610	HORVU.MOREX.r3.7HG0656000	HORVU.MOREX.r3.5HG0536790	HORVU.MOREX.r3.4HG0400630	HORVU.MOREX.r3.3HG0289950	HORVU.MOREX.r3.2HG0166740	HORVU.MOREX.r3.2HG0136990
HORVU.MOREX.r3.1HG0001620	HORVU.MOREX.r3.7HG0656030	HORVU.MOREX.r3.5HG0536810	HORVU.MOREX.r3.4HG0400690	HORVU.MOREX.r3.3HG0289960	HORVU.MOREX.r3.2HG0166760	HORVU.MOREX.r3.2HG0137000
HORVU.MOREX.r3.1HG0001630	HORVU.MOREX.r3.7HG0656050	HORVU.MOREX.r3.5HG0536830	HORVU.MOREX.r3.4HG0400700	HORVU.MOREX.r3.3HG0289970	HORVU.MOREX.r3.2HG0166780	HORVU.MOREX.r3.2HG0137010
HORVU.MOREX.r3.1HG0001640	HORVU.MOREX.r3.7HG0656060	HORVU.MOREX.r3.5HG0536850	HORVU.MOREX.r3.4HG0400710	HORVU.MOREX.r3.3HG0289980	HORVU.MOREX.r3.2HG0166800	HORVU.MOREX.r3.2HG0137050
HORVU.MOREX.r3.1HG0001650	HORVU.MOREX.r3.7HG0656080	HORVU.MOREX.r3.5HG0536860	HORVU.MOREX.r3.4HG0400730	HORVU.MOREX.r3.3HG0290000	HORVU.MOREX.r3.2HG0166820	HORVU.MOREX.r3.2HG0137070
HORVU.MOREX.r3.1HG0001660	HORVU.MOREX.r3.7HG0656090	HORVU.MOREX.r3.5HG0536890	HORVU.MOREX.r3.4HG0400740	HORVU.MOREX.r3.3HG0290040	HORVU.MOREX.r3.2HG0166840	HORVU.MOREX.r3.2HG0137190
HORVU.MOREX.r3.1HG0001670	HORVU.MOREX.r3.7HG0656100	HORVU.MOREX.r3.5HG0536900	HORVU.MOREX.r3.4HG0400760	HORVU.MOREX.r3.3HG0290070	HORVU.MOREX.r3.2HG0166850	HORVU.MOREX.r3.2HG0137220
HORVU.MOREX.r3.1HG0001690	HORVU.MOREX.r3.7HG0656110	HORVU.MOREX.r3.5HG0536910	HORVU.MOREX.r3.4HG0400780	HORVU.MOREX.r3.3HG0290090	HORVU.MOREX.r3.2HG0166860	HORVU.MOREX.r3.2HG0137270
HORVU.MOREX.r3.1HG0001700	HORVU.MOREX.r3.7HG0656130	HORVU.MOREX.r3.5HG0536930	HORVU.MOREX.r3.4HG0400790	HORVU.MOREX.r3.3HG0290100	HORVU.MOREX.r3.2HG0166910	HORVU.MOREX.r3.2HG0137310
HORVU.MOREX.r3.1HG0001720	HORVU.MOREX.r3.7HG0656150	HORVU.MOREX.r3.5HG0536960	HORVU.MOREX.r3.4HG0400800	HORVU.MOREX.r3.3HG0290120	HORVU.MOREX.r3.2HG0166930	HORVU.MOREX.r3.2HG0137360
HORVU.MOREX.r3.1HG0001730	HORVU.MOREX.r3.7HG0656210	HORVU.MOREX.r3.5HG0536970	HORVU.MOREX.r3.4HG0400810	HORVU.MOREX.r3.3HG0290130	HORVU.MOREX.r3.2HG0166980	HORVU.MOREX.r3.2HG0137380
HORVU.MOREX.r3.1HG0001750	HORVU.MOREX.r3.7HG0656220	HORVU.MOREX.r3.5HG0536980	HORVU.MOREX.r3.4HG0400820	HORVU.MOREX.r3.3HG0290140	HORVU.MOREX.r3.2HG0167030	HORVU.MOREX.r3.2HG0137390
HORVU.MOREX.r3.1HG0001760	HORVU.MOREX.r3.7HG0656230	HORVU.MOREX.r3.5HG0537000	HORVU.MOREX.r3.4HG0400840	HORVU.MOREX.r3.3HG0290160	HORVU.MOREX.r3.2HG0167040	HORVU.MOREX.r3.2HG0137420
HORVU.MOREX.r3.1HG0001770	HORVU.MOREX.r3.7HG0656240	HORVU.MOREX.r3.5HG0537010	HORVU.MOREX.r3.4HG0400860	HORVU.MOREX.r3.3HG0290170	HORVU.MOREX.r3.2HG0167050	HORVU.MOREX.r3.2HG0137440
HORVU.MOREX.r3.1HG0001780	HORVU.MOREX.r3.7HG0656250	HORVU.MOREX.r3.5HG0537050	HORVU.MOREX.r3.4HG0400870	HORVU.MOREX.r3.3HG0290180	HORVU.MOREX.r3.2HG0167060	HORVU.MOREX.r3.2HG0137460
HORVU.MOREX.r3.1HG0001790	HORVU.MOREX.r3.7HG0656260	HORVU.MOREX.r3.5HG0537060	HORVU.MOREX.r3.4HG0400880	HORVU.MOREX.r3.3HG0290200	HORVU.MOREX.r3.2HG0167190	HORVU.MOREX.r3.2HG0137480
HORVU.MOREX.r3.1HG0001800	HORVU.MOREX.r3.7HG0656270	HORVU.MOREX.r3.5HG0537070	HORVU.MOREX.r3.4HG0400890	HORVU.MOREX.r3.3HG0290210	HORVU.MOREX.r3.2HG0167200	HORVU.MOREX.r3.2HG0137510
HORVU.MOREX.r3.1HG0001810	HORVU.MOREX.r3.7HG0656280	HORVU.MOREX.r3.5HG0537090	HORVU.MOREX.r3.4HG0400910	HORVU.MOREX.r3.3HG0290220	HORVU.MOREX.r3.2HG0167210	HORVU.MOREX.r3.2HG0137590
HORVU.MOREX.r3.1HG0001820	HORVU.MOREX.r3.7HG0656290	HORVU.MOREX.r3.5HG0537110	HORVU.MOREX.r3.4HG0400920	HORVU.MOREX.r3.3HG0290230	HORVU.MOREX.r3.2HG0167220	HORVU.MOREX.r3.2HG0137600
HORVU.MOREX.r3.1HG0001840	HORVU.MOREX.r3.7HG0656330	HORVU.MOREX.r3.5HG0537120	HORVU.MOREX.r3.4HG0400930	HORVU.MOREX.r3.3HG0290240	HORVU.MOREX.r3.2HG0167230	HORVU.MOREX.r3.2HG0137620
HORVU.MOREX.r3.1HG0001850	HORVU.MOREX.r3.7HG0656350	HORVU.MOREX.r3.5HG0537130	HORVU.MOREX.r3.4HG0400940	HORVU.MOREX.r3.3HG0290250	HORVU.MOREX.r3.2HG0167280	HORVU.MOREX.r3.2HG0137660
HORVU.MOREX.r3.1HG0001880	HORVU.MOREX.r3.7HG0656360	HORVU.MOREX.r3.5HG0537140	HORVU.MOREX.r3.4HG0400950	HORVU.MOREX.r3.3HG0290280	HORVU.MOREX.r3.2HG0167300	HORVU.MOREX.r3.2HG0137670
HORVU.MOREX.r3.1HG0001890	HORVU.MOREX.r3.7HG0656410	HORVU.MOREX.r3.5HG0537150	HORVU.MOREX.r3.4HG0400960	HORVU.MOREX.r3.3HG0290290	HORVU.MOREX.r3.2HG0167320	HORVU.MOREX.r3.2HG0137690
HORVU.MOREX.r3.1HG0001910	HORVU.MOREX.r3.7HG0656430	HORVU.MOREX.r3.5HG0537160	HORVU.MOREX.r3.4HG0400980	HORVU.MOREX.r3.3HG0290300	HORVU.MOREX.r3.2HG0167350	HORVU.MOREX.r3.2HG0137760
HORVU.MOREX.r3.1HG0001920	HORVU.MOREX.r3.7HG0656440	HORVU.MOREX.r3.5HG0537170	HORVU.MOREX.r3.4HG0400990	HORVU.MOREX.r3.3HG0290310	HORVU.MOREX.r3.2HG0167390	HORVU.MOREX.r3.2HG0137770
HORVU.MOREX.r3.1HG0001930	HORVU.MOREX.r3.7HG0656460	HORVU.MOREX.r3.5HG0537180	HORVU.MOREX.r3.4HG0401020	HORVU.MOREX.r3.3HG0290320	HORVU.MOREX.r3.2HG0167400	HORVU.MOREX.r3.2HG0137810
HORVU.MOREX.r3.1HG0001940	HORVU.MOREX.r3.7HG0656470	HORVU.MOREX.r3.5HG0537190	HORVU.MOREX.r3.4HG0401040	HORVU.MOREX.r3.3HG0290340	HORVU.MOREX.r3.2HG0167410	HORVU.MOREX.r3.2HG0138000
HORVU.MOREX.r3.1HG0001950	HORVU.MOREX.r3.7HG0656480	HORVU.MOREX.r3.5HG0537200	HORVU.MOREX.r3.4HG0401050	HORVU.MOREX.r3.3HG0290350	HORVU.MOREX.r3.2HG0167420	HORVU.MOREX.r3.2HG0138020
HORVU.MOREX.r3.1HG0001980	HORVU.MOREX.r3.7HG0656490	HORVU.MOREX.r3.5HG0537210	HORVU.MOREX.r3.4HG0401060	HORVU.MOREX.r3.3HG0290420	HORVU.MOREX.r3.2HG0167440	HORVU.MOREX.r3.2HG0138030
HORVU.MOREX.r3.1HG0001990	HORVU.MOREX.r3.7HG0656510	HORVU.MOREX.r3.5HG0537230	HORVU.MOREX.r3.4HG0401070	HORVU.MOREX.r3.3HG0290430	HORVU.MOREX.r3.2HG0167460	HORVU.MOREX.r3.2HG0138050
HORVU.MOREX.r3.1HG0002010	HORVU.MOREX.r3.7HG0656520	HORVU.MOREX.r3.5HG0537240	HORVU.MOREX.r3.4HG0401080	HORVU.MOREX.r3.3HG0290470	HORVU.MOREX.r3.2HG0167500	HORVU.MOREX.r3.2HG0138060
HORVU.MOREX.r3.1HG0002020	HORVU.MOREX.r3.7HG0656530	HORVU.MOREX.r3.5HG0537270	HORVU.MOREX.r3.4HG0401110	HORVU.MOREX.r3.3HG0290510	HORVU.MOREX.r3.2HG0167540	HORVU.MOREX.r3.2HG0138080
HORVU.MOREX.r3.1HG0002040	HORVU.MOREX.r3.7HG0656540	HORVU.MOREX.r3.5HG0537290	HORVU.MOREX.r3.4HG0401130	HORVU.MOREX.r3.3HG0290550	HORVU.MOREX.r3.2HG0167550	HORVU.MOREX.r3.2HG0138210
HORVU.MOREX.r3.1HG0002050	HORVU.MOREX.r3.7HG0656550	HORVU.MOREX.r3.5HG0537300	HORVU.MOREX.r3.4HG0401170	HORVU.MOREX.r3.3HG0290580	HORVU.MOREX.r3.2HG0167570	HORVU.MOREX.r3.2HG0138220
HORVU.MOREX.r3.1HG0002060	HORVU.MOREX.r3.7HG0656560	HORVU.MOREX.r3.5HG0537310	HORVU.MOREX.r3.4HG0401180	HORVU.MOREX.r3.3HG0290590	HORVU.MOREX.r3.2HG0167590	HORVU.MOREX.r3.2HG0138250
HORVU.MOREX.r3.1HG0002080	HORVU.MOREX.r3.7HG0656570	HORVU.MOREX.r3.5HG0537320	HORVU.MOREX.r3.4HG0401190	HORVU.MOREX.r3.3HG0290630	HORVU.MOREX.r3.2HG0167610	HORVU.MOREX.r3.2HG0138270
HORVU.MOREX.r3.1HG0002090	HORVU.MOREX.r3.7HG0656580	HORVU.MOREX.r3.5HG0537330	HORVU.MOREX.r3.4HG0401200	HORVU.MOREX.r3.3HG0290640	HORVU.MOREX.r3.2HG0167620	HORVU.MOREX.r3.2HG0138280
HORVU.MOREX.r3.1HG0002100	HORVU.MOREX.r3.7HG0656600	HORVU.MOREX.r3.5HG0537350	HORVU.MOREX.r3.4HG0401210	HORVU.MOREX.r3.3HG0290660	HORVU.MOREX.r3.2HG0167650	HORVU.MOREX.r3.2HG0138300
HORVU.MOREX.r3.1HG0002130	HORVU.MOREX.r3.7HG0656610	HORVU.MOREX.r3.5HG0537360	HORVU.MOREX.r3.4HG0401220	HORVU.MOREX.r3.3HG0290670	HORVU.MOREX.r3.2HG0167660	HORVU.MOREX.r3.2HG0138310
HORVU.MOREX.r3.1HG0002140	HORVU.MOREX.r3.7HG0656620	HORVU.MOREX.r3.5HG0537370	HORVU.MOREX.r3.4HG0401230	HORVU.MOREX.r3.3HG0290710	HORVU.MOREX.r3.2HG0167670	HORVU.MOREX.r3.2HG0138320
HORVU.MOREX.r3.1HG0002160	HORVU.MOREX.r3.7HG0656640	HORVU.MOREX.r3.5HG0537390	HORVU.MOREX.r3.4HG0401250	HORVU.MOREX.r3.3HG0290730	HORVU.MOREX.r3.2HG0167750	HORVU.MOREX.r3.2HG0138340
HORVU.MOREX.r3.1HG0002170	HORVU.MOREX.r3.7HG0656670	HORVU.MOREX.r3.5HG0537400	HORVU.MOREX.r3.4HG0401260	HORVU.MOREX.r3.3HG0290780	HORVU.MOREX.r3.2HG0167780	HORVU.MOREX.r3.2HG0138380
HORVU.MOREX.r3.1HG0002180	HORVU.MOREX.r3.7HG0656700	HORVU.MOREX.r3.5HG0537420	HORVU.MOREX.r3.4HG0401280	HORVU.MOREX.r3.3HG0290790	HORVU.MOREX.r3.2HG0167910	HORVU.MOREX.r3.2HG0138420
HORVU.MOREX.r3.1HG0002190	HORVU.MOREX.r3.7HG0656710	HORVU.MOREX.r3.5HG0537440	HORVU.MOREX.r3.4HG0401290	HORVU.MOREX.r3.3HG0290820	HORVU.MOREX.r3.2HG0167950	HORVU.MOREX.r3.2HG0138430
HORVU.MOREX.r3.1HG0002200	HORVU.MOREX.r3.7HG0656750	HORVU.MOREX.r3.5HG0537450	HORVU.MOREX.r3.4HG0401300	HORVU.MOREX.r3.3HG0290860	HORVU.MOREX.r3.2HG0167960	HORVU.MOREX.r3.2HG0138480
HORVU.MOREX.r3.1HG0002210	HORVU.MOREX.r3.7HG0656760	HORVU.MOREX.r3.5HG0537470	HORVU.MOREX.r3.4HG0401310	HORVU.MOREX.r3.3HG0290880	HORVU.MOREX.r3.2HG0167970	HORVU.MOREX.r3.2HG0138490
HORVU.MOREX.r3.1HG0002220	HORVU.MOREX.r3.7HG0656800	HORVU.MOREX.r3.5HG0537490	HORVU.MOREX.r3.4HG0401320	HORVU.MOREX.r3.3HG0290890	HORVU.MOREX.r3.2HG0167990	HORVU.MOREX.r3.2HG0138530
HORVU.MOREX.r3.1HG0002230	HORVU.MOREX.r3.7HG0656840	HORVU.MOREX.r3.5HG0537500	HORVU.MOREX.r3.4HG0401330	HORVU.MOREX.r3.3HG0290900	HORVU.MOREX.r3.2HG0168030	HORVU.MOREX.r3.2HG0138540
HORVU.MOREX.r3.1HG0002260	HORVU.MOREX.r3.7HG0656850	HORVU.MOREX.r3.5HG0537510	HORVU.MOREX.r3.4HG0401370	HORVU.MOREX.r3.3HG0290910	HORVU.MOREX.r3.2HG0168040	HORVU.MOREX.r3.2HG0138550
HORVU.MOREX.r3.1HG0002280	HORVU.MOREX.r3.7HG0656870	HORVU.MOREX.r3.5HG0537520	HORVU.MOREX.r3.4HG0401380	HORVU.MOREX.r3.3HG0290920	HORVU.MOREX.r3.2HG0168050	HORVU.MOREX.r3.2HG0138590
HORVU.MOREX.r3.1HG0002320	HORVU.MOREX.r3.7HG0656900	HORVU.MOREX.r3.5HG0537530	HORVU.MOREX.r3.4HG0401390	HORVU.MOREX.r3.3HG0290940	HORVU.MOREX.r3.2HG0168060	HORVU.MOREX.r3.2HG0138600
HORVU.MOREX.r3.1HG0002330	HORVU.MOREX.r3.7HG0656910	HORVU.MOREX.r3.5HG0537570	HORVU.MOREX.r3.4HG0401400	HORVU.MOREX.r3.3HG0290950	HORVU.MOREX.r3.2HG0168070	HORVU.MOREX.r3.2HG0138610
HORVU.MOREX.r3.1HG0002340	HORVU.MOREX.r3.7HG0656920	HORVU.MOREX.r3.5HG0537580	HORVU.MOREX.r3.4HG0401420	HORVU.MOREX.r3.3HG0290960	HORVU.MOREX.r3.2HG0168090	HORVU.MOREX.r3.2HG0138620
HORVU.MOREX.r3.1HG0002350	HORVU.MOREX.r3.7HG0656940	HORVU.MOREX.r3.5HG0537610	HORVU.MOREX.r3.4HG0401440	HORVU.MOREX.r3.3HG0290970	HORVU.MOREX.r3.2HG0168100	HORVU.MOREX.r3.2HG0138630
HORVU.MOREX.r3.1HG0002380	HORVU.MOREX.r3.7HG0656950	HORVU.MOREX.r3.5HG0537620	HORVU.MOREX.r3.4HG0401450	HORVU.MOREX.r3.3HG0290980	HORVU.MOREX.r3.2HG0168110	HORVU.MOREX.r3.2HG0138660
HORVU.MOREX.r3.1HG0002390	HORVU.MOREX.r3.7HG0656960	HORVU.MOREX.r3.5HG0537630	HORVU.MOREX.r3.4HG0401480	HORVU.MOREX.r3.3HG0291030	HORVU.MOREX.r3.2HG0168120	HORVU.MOREX.r3.2HG0138680
HORVU.MOREX.r3.1HG0002400	HORVU.MOREX.r3.7HG0656970	HORVU.MOREX.r3.5HG0537640	HORVU.MOREX.r3.4HG0401500	HORVU.MOREX.r3.3HG0291040	HORVU.MOREX.r3.2HG0168170	HORVU.MOREX.r3.2HG0138690
HORVU.MOREX.r3.1HG0002410	HORVU.MOREX.r3.7HG0656990	HORVU.MOREX.r3.5HG0537650	HORVU.MOREX.r3.4HG0401510	HORVU.MOREX.r3.3HG0291050	HORVU.MOREX.r3.2HG0168200	HORVU.MOREX.r3.2HG0138720
HORVU.MOREX.r3.1HG0002440	HORVU.MOREX.r3.7HG0657010	HORVU.MOREX.r3.5HG0537660	HORVU.MOREX.r3.4HG0401520	HORVU.MOREX.r3.3HG0291060	HORVU.MOREX.r3.2HG0168210	HORVU.MOREX.r3.2HG0138730
HORVU.MOREX.r3.1HG0002450	HORVU.MOREX.r3.7HG0657050	HORVU.MOREX.r3.5HG0537670	HORVU.MOREX.r3.4HG0401530	HORVU.MOREX.r3.3HG0291100	HORVU.MOREX.r3.2HG0168260	HORVU.MOREX.r3.2HG0138760
HORVU.MOREX.r3.1HG0002470	HORVU.MOREX.r3.7HG0657070	HORVU.MOREX.r3.5HG0537680	HORVU.MOREX.r3.4HG0401570	HORVU.MOREX.r3.3HG0291130	HORVU.MOREX.r3.2HG0168270	HORVU.MOREX.r3.2HG0138770
HORVU.MOREX.r3.1HG0002500	HORVU.MOREX.r3.7HG0657090	HORVU.MOREX.r3.5HG0537690	HORVU.MOREX.r3.4HG0401580	HORVU.MOREX.r3.3HG0291150	HORVU.MOREX.r3.2HG0168310	HORVU.MOREX.r3.2HG0138780
HORVU.MOREX.r3.1HG0002510	HORVU.MOREX.r3.7HG0657170	HORVU.MOREX.r3.5HG0537700	HORVU.MOREX.r3.4HG0401620	HORVU.MOREX.r3.3HG0291160	HORVU.MOREX.r3.2HG0168320	HORVU.MOREX.r3.2HG0138790
HORVU.MOREX.r3.1HG0002520	HORVU.MOREX.r3.7HG0657180	HORVU.MOREX.r3.5HG0537740	HORVU.MOREX.r3.4HG0401630	HORVU.MOREX.r3.3HG0291170	HORVU.MOREX.r3.2HG0168330	HORVU.MOREX.r3.2HG0138810
HORVU.MOREX.r3.1HG0002530	HORVU.MOREX.r3.7HG0657190	HORVU.MOREX.r3.5HG0537750	HORVU.MOREX.r3.4HG0401640	HORVU.MOREX.r3.3HG0291190	HORVU.MOREX.r3.2HG0168350	HORVU.MOREX.r3.2HG0138840
HORVU.MOREX.r3.1HG0002560	HORVU.MOREX.r3.7HG0657210	HORVU.MOREX.r3.5HG0537780	HORVU.MOREX.r3.4HG0401670	HORVU.MOREX.r3.3HG0291200	HORVU.MOREX.r3.2HG0168360	HORVU.MOREX.r3.2HG0138880
HORVU.MOREX.r3.1HG0002570	HORVU.MOREX.r3.7HG0657240	HORVU.MOREX.r3.5HG0537790	HORVU.MOREX.r3.4HG0401690	HORVU.MOREX.r3.3HG0291230	HORVU.MOREX.r3.2HG0168370	HORVU.MOREX.r3.2HG0138900
HORVU.MOREX.r3.1HG0002580	HORVU.MOREX.r3.7HG0657260	HORVU.MOREX.r3.5HG0537810	HORVU.MOREX.r3.4HG0401710	HORVU.MOREX.r3.3HG0291280	HORVU.MOREX.r3.2HG0168400	HORVU.MOREX.r3.2HG0138920
HORVU.MOREX.r3.1HG0002590	HORVU.MOREX.r3.7HG0657280	HORVU.MOREX.r3.5HG0537840	HORVU.MOREX.r3.4HG0401720	HORVU.MOREX.r3.3HG0291310	HORVU.MOREX.r3.2HG0168470	HORVU.MOREX.r3.2HG0138930
HORVU.MOREX.r3.1HG0002630	HORVU.MOREX.r3.7HG0657290	HORVU.MOREX.r3.5HG0537850	HORVU.MOREX.r3.4HG0401730	HORVU.MOREX.r3.3HG0291320	HORVU.MOREX.r3.2HG0168480	HORVU.MOREX.r3.2HG0138980
HORVU.MOREX.r3.1HG0002640	HORVU.MOREX.r3.7HG0657310	HORVU.MOREX.r3.5HG0537860	HORVU.MOREX.r3.4HG0401740	HORVU.MOREX.r3.3HG0291340	HORVU.MOREX.r3.2HG0168520	HORVU.MOREX.r3.2HG0138990
HORVU.MOREX.r3.1HG0002660	HORVU.MOREX.r3.7HG0657320	HORVU.MOREX.r3.5HG0537870	HORVU.MOREX.r3.4HG0401770	HORVU.MOREX.r3.3HG0291360	HORVU.MOREX.r3.2HG0168560	HORVU.MOREX.r3.2HG0139040
HORVU.MOREX.r3.1HG0002670	HORVU.MOREX.r3.7HG0657330	HORVU.MOREX.r3.5HG0537880	HORVU.MOREX.r3.4HG0401780	HORVU.MOREX.r3.3HG0291370	HORVU.MOREX.r3.2HG0168570	HORVU.MOREX.r3.2HG0139050
HORVU.MOREX.r3.1HG0002680	HORVU.MOREX.r3.7HG0657340	HORVU.MOREX.r3.5HG0537890	HORVU.MOREX.r3.4HG0401840	HORVU.MOREX.r3.3HG0291380	HORVU.MOREX.r3.2HG0168580	HORVU.MOREX.r3.2HG0139060
HORVU.MOREX.r3.1HG0002690	HORVU.MOREX.r3.7HG0657370	HORVU.MOREX.r3.5HG0537910	HORVU.MOREX.r3.4HG0401890	HORVU.MOREX.r3.3HG0291390	HORVU.MOREX.r3.2HG0168590	HORVU.MOREX.r3.2HG0139070
HORVU.MOREX.r3.1HG0002750	HORVU.MOREX.r3.7HG0657380	HORVU.MOREX.r3.5HG0537920	HORVU.MOREX.r3.4HG0401910	HORVU.MOREX.r3.3HG0291400	HORVU.MOREX.r3.2HG0168610	HORVU.MOREX.r3.2HG0139080
HORVU.MOREX.r3.1HG0002770	HORVU.MOREX.r3.7HG0657390	HORVU.MOREX.r3.5HG0537930	HORVU.MOREX.r3.4HG0401920	HORVU.MOREX.r3.3HG0291410	HORVU.MOREX.r3.2HG0168640	HORVU.MOREX.r3.2HG0139090
HORVU.MOREX.r3.1HG0002800	HORVU.MOREX.r3.7HG0657400	HORVU.MOREX.r3.5HG0537940	HORVU.MOREX.r3.4HG0401930	HORVU.MOREX.r3.3HG0291420	HORVU.MOREX.r3.2HG0168650	HORVU.MOREX.r3.2HG0139120
HORVU.MOREX.r3.1HG0002810	HORVU.MOREX.r3.7HG0657420	HORVU.MOREX.r3.5HG0537960	HORVU.MOREX.r3.4HG0401950	HORVU.MOREX.r3.3HG0291430	HORVU.MOREX.r3.2HG0168660	HORVU.MOREX.r3.2HG0139140
HORVU.MOREX.r3.1HG0002820	HORVU.MOREX.r3.7HG0657430	HORVU.MOREX.r3.5HG0537970	HORVU.MOREX.r3.4HG0401980	HORVU.MOREX.r3.3HG0291440	HORVU.MOREX.r3.2HG0168690	HORVU.MOREX.r3.2HG0139160
HORVU.MOREX.r3.1HG0002830	HORVU.MOREX.r3.7HG0657440	HORVU.MOREX.r3.5HG0537980	HORVU.MOREX.r3.4HG0402000	HORVU.MOREX.r3.3HG0291450	HORVU.MOREX.r3.2HG0168700	HORVU.MOREX.r3.2HG0139190
HORVU.MOREX.r3.1HG0002840	HORVU.MOREX.r3.7HG0657460	HORVU.MOREX.r3.5HG0537990	HORVU.MOREX.r3.4HG0402030	HORVU.MOREX.r3.3HG0291490	HORVU.MOREX.r3.2HG0168720	HORVU.MOREX.r3.2HG0139210
HORVU.MOREX.r3.1HG0002850	HORVU.MOREX.r3.7HG0657470	HORVU.MOREX.r3.5HG0538000	HORVU.MOREX.r3.4HG0402050	HORVU.MOREX.r3.3HG0291550	HORVU.MOREX.r3.2HG0168730	HORVU.MOREX.r3.2HG0139220
HORVU.MOREX.r3.1HG0002860	HORVU.MOREX.r3.7HG0657500	HORVU.MOREX.r3.5HG0538040	HORVU.MOREX.r3.4HG0402070	HORVU.MOREX.r3.3HG0291570	HORVU.MOREX.r3.2HG0168760	HORVU.MOREX.r3.2HG0139230
HORVU.MOREX.r3.1HG0002870	HORVU.MOREX.r3.7HG0657520	HORVU.MOREX.r3.5HG0538050	HORVU.MOREX.r3.4HG0402080	HORVU.MOREX.r3.3HG0291580	HORVU.MOREX.r3.2HG0168770	HORVU.MOREX.r3.2HG0139240
HORVU.MOREX.r3.1HG0002880	HORVU.MOREX.r3.7HG0657550	HORVU.MOREX.r3.5HG0538060	HORVU.MOREX.r3.4HG0402090	HORVU.MOREX.r3.3HG0291590	HORVU.MOREX.r3.2HG0168780	HORVU.MOREX.r3.2HG0139250
HORVU.MOREX.r3.1HG0002890	HORVU.MOREX.r3.7HG0657570	HORVU.MOREX.r3.5HG0538070	HORVU.MOREX.r3.4HG0402100	HORVU.MOREX.r3.3HG0291600	HORVU.MOREX.r3.2HG0168790	HORVU.MOREX.r3.2HG0139260
HORVU.MOREX.r3.1HG0002910	HORVU.MOREX.r3.7HG0657600	HORVU.MOREX.r3.5HG0538080	HORVU.MOREX.r3.4HG0402120	HORVU.MOREX.r3.3HG0291620	HORVU.MOREX.r3.2HG0168820	HORVU.MOREX.r3.2HG0139270
HORVU.MOREX.r3.1HG0002920	HORVU.MOREX.r3.7HG0657610	HORVU.MOREX.r3.5HG0538100	HORVU.MOREX.r3.4HG0402130	HORVU.MOREX.r3.3HG0291660	HORVU.MOREX.r3.2HG0168830	HORVU.MOREX.r3.2HG0139280
HORVU.MOREX.r3.1HG0002940	HORVU.MOREX.r3.7HG0657620	HORVU.MOREX.r3.5HG0538110	HORVU.MOREX.r3.4HG0402150	HORVU.MOREX.r3.3HG0291670	HORVU.MOREX.r3.2HG0168840	HORVU.MOREX.r3.2HG0139290
HORVU.MOREX.r3.1HG0002950	HORVU.MOREX.r3.7HG0657630	HORVU.MOREX.r3.5HG0538120	HORVU.MOREX.r3.4HG0402160	HORVU.MOREX.r3.3HG0291680	HORVU.MOREX.r3.2HG0168860	HORVU.MOREX.r3.2HG0139300
HORVU.MOREX.r3.1HG0002960	HORVU.MOREX.r3.7HG0657640	HORVU.MOREX.r3.5HG0538130	HORVU.MOREX.r3.4HG0402170	HORVU.MOREX.r3.3HG0291690	HORVU.MOREX.r3.2HG0168880	HORVU.MOREX.r3.2HG0139310
HORVU.MOREX.r3.1HG0002980	HORVU.MOREX.r3.7HG0657660	HORVU.MOREX.r3.5HG0538160	HORVU.MOREX.r3.4HG0402190	HORVU.MOREX.r3.3HG0291710	HORVU.MOREX.r3.2HG0168890	HORVU.MOREX.r3.2HG0139320
HORVU.MOREX.r3.1HG0002990	HORVU.MOREX.r3.7HG0657700	HORVU.MOREX.r3.5HG0538170	HORVU.MOREX.r3.4HG0402200	HORVU.MOREX.r3.3HG0291720	HORVU.MOREX.r3.2HG0168900	HORVU.MOREX.r3.2HG0139330
HORVU.MOREX.r3.1HG0003000	HORVU.MOREX.r3.7HG0657780	HORVU.MOREX.r3.5HG0538180	HORVU.MOREX.r3.4HG0402300	HORVU.MOREX.r3.3HG0291730	HORVU.MOREX.r3.2HG0168940	HORVU.MOREX.r3.2HG0139340
HORVU.MOREX.r3.1HG0003010	HORVU.MOREX.r3.7HG0657790	HORVU.MOREX.r3.5HG0538190	HORVU.MOREX.r3.4HG0402310	HORVU.MOREX.r3.3HG0291740	HORVU.MOREX.r3.2HG0168950	HORVU.MOREX.r3.2HG0139370
HORVU.MOREX.r3.1HG0003030	HORVU.MOREX.r3.7HG0657830	HORVU.MOREX.r3.6HG0538230	HORVU.MOREX.r3.4HG0402320	HORVU.MOREX.r3.3HG0291750	HORVU.MOREX.r3.2HG0168970	HORVU.MOREX.r3.2HG0139380
HORVU.MOREX.r3.1HG0003040	HORVU.MOREX.r3.7HG0657860	HORVU.MOREX.r3.6HG0538240	HORVU.MOREX.r3.4HG0402330	HORVU.MOREX.r3.3HG0291760	HORVU.MOREX.r3.2HG0168990	HORVU.MOREX.r3.2HG0139400
HORVU.MOREX.r3.1HG0003050	HORVU.MOREX.r3.7HG0657870	HORVU.MOREX.r3.6HG0538250	HORVU.MOREX.r3.4HG0402390	HORVU.MOREX.r3.3HG0291790	HORVU.MOREX.r3.2HG0169000	HORVU.MOREX.r3.2HG0139420
HORVU.MOREX.r3.1HG0003060	HORVU.MOREX.r3.7HG0657880	HORVU.MOREX.r3.6HG0538260	HORVU.MOREX.r3.4HG0402400	HORVU.MOREX.r3.3HG0291820	HORVU.MOREX.r3.2HG0169020	HORVU.MOREX.r3.2HG0139440
HORVU.MOREX.r3.1HG0003070	HORVU.MOREX.r3.7HG0657900	HORVU.MOREX.r3.6HG0538270	HORVU.MOREX.r3.4HG0402470	HORVU.MOREX.r3.3HG0291840	HORVU.MOREX.r3.2HG0169030	HORVU.MOREX.r3.2HG0139470
HORVU.MOREX.r3.1HG0003080	HORVU.MOREX.r3.7HG0657910	HORVU.MOREX.r3.6HG0538280	HORVU.MOREX.r3.4HG0402490	HORVU.MOREX.r3.3HG0291870	HORVU.MOREX.r3.2HG0169040	HORVU.MOREX.r3.2HG0139520
HORVU.MOREX.r3.1HG0003090	HORVU.MOREX.r3.7HG0657930	HORVU.MOREX.r3.6HG0538290	HORVU.MOREX.r3.4HG0402500	HORVU.MOREX.r3.3HG0291890	HORVU.MOREX.r3.2HG0169050	HORVU.MOREX.r3.2HG0139560
HORVU.MOREX.r3.1HG0003100	HORVU.MOREX.r3.7HG0657940	HORVU.MOREX.r3.6HG0538310	HORVU.MOREX.r3.4HG0402590	HORVU.MOREX.r3.3HG0291900	HORVU.MOREX.r3.2HG0169090	HORVU.MOREX.r3.2HG0139580
HORVU.MOREX.r3.1HG0003110	HORVU.MOREX.r3.7HG0657970	HORVU.MOREX.r3.6HG0538340	HORVU.MOREX.r3.4HG0402600	HORVU.MOREX.r3.3HG0291910	HORVU.MOREX.r3.2HG0169130	HORVU.MOREX.r3.2HG0139590
HORVU.MOREX.r3.1HG0003120	HORVU.MOREX.r3.7HG0657990	HORVU.MOREX.r3.6HG0538350	HORVU.MOREX.r3.4HG0402610	HORVU.MOREX.r3.3HG0291920	HORVU.MOREX.r3.2HG0169150	HORVU.MOREX.r3.2HG0139640
HORVU.MOREX.r3.1HG0003130	HORVU.MOREX.r3.7HG0658010	HORVU.MOREX.r3.6HG0538360	HORVU.MOREX.r3.4HG0402620	HORVU.MOREX.r3.3HG0291930	HORVU.MOREX.r3.2HG0169220	HORVU.MOREX.r3.2HG0139650
HORVU.MOREX.r3.1HG0003140	HORVU.MOREX.r3.7HG0658020	HORVU.MOREX.r3.6HG0538370	HORVU.MOREX.r3.4HG0402640	HORVU.MOREX.r3.3HG0291990	HORVU.MOREX.r3.2HG0169240	HORVU.MOREX.r3.2HG0139670
HORVU.MOREX.r3.1HG0003150	HORVU.MOREX.r3.7HG0658040	HORVU.MOREX.r3.6HG0538380	HORVU.MOREX.r3.4HG0402650	HORVU.MOREX.r3.3HG0292000	HORVU.MOREX.r3.2HG0169250	HORVU.MOREX.r3.2HG0139810
HORVU.MOREX.r3.1HG0003160	HORVU.MOREX.r3.7HG0658050	HORVU.MOREX.r3.6HG0538410	HORVU.MOREX.r3.4HG0402660	HORVU.MOREX.r3.3HG0292020	HORVU.MOREX.r3.2HG0169260	HORVU.MOREX.r3.2HG0139830
HORVU.MOREX.r3.1HG0003170	HORVU.MOREX.r3.7HG0658060	HORVU.MOREX.r3.6HG0538420	HORVU.MOREX.r3.4HG0402670	HORVU.MOREX.r3.3HG0292080	HORVU.MOREX.r3.2HG0169280	HORVU.MOREX.r3.2HG0139840
HORVU.MOREX.r3.1HG0003180	HORVU.MOREX.r3.7HG0658080	HORVU.MOREX.r3.6HG0538430	HORVU.MOREX.r3.4HG0402690	HORVU.MOREX.r3.3HG0292090	HORVU.MOREX.r3.2HG0169290	HORVU.MOREX.r3.2HG0139860
HORVU.MOREX.r3.1HG0003200	HORVU.MOREX.r3.7HG0658090	HORVU.MOREX.r3.6HG0538440	HORVU.MOREX.r3.4HG0402700	HORVU.MOREX.r3.3HG0292100	HORVU.MOREX.r3.2HG0169350	HORVU.MOREX.r3.2HG0139900
HORVU.MOREX.r3.1HG0003210	HORVU.MOREX.r3.7HG0658120	HORVU.MOREX.r3.6HG0538450	HORVU.MOREX.r3.4HG0402720	HORVU.MOREX.r3.3HG0292110	HORVU.MOREX.r3.2HG0169360	HORVU.MOREX.r3.2HG0139920
HORVU.MOREX.r3.1HG0003220	HORVU.MOREX.r3.7HG0658130	HORVU.MOREX.r3.6HG0538460	HORVU.MOREX.r3.4HG0402730	HORVU.MOREX.r3.3HG0292120	HORVU.MOREX.r3.2HG0169370	HORVU.MOREX.r3.2HG0139960
HORVU.MOREX.r3.1HG0003230	HORVU.MOREX.r3.7HG0658160	HORVU.MOREX.r3.6HG0538470	HORVU.MOREX.r3.4HG0402760	HORVU.MOREX.r3.3HG0292140	HORVU.MOREX.r3.2HG0169420	HORVU.MOREX.r3.2HG0140040
HORVU.MOREX.r3.1HG0003240	HORVU.MOREX.r3.7HG0658170	HORVU.MOREX.r3.6HG0538480	HORVU.MOREX.r3.4HG0402790	HORVU.MOREX.r3.3HG0292190	HORVU.MOREX.r3.2HG0169450	HORVU.MOREX.r3.2HG0140050
HORVU.MOREX.r3.1HG0003260	HORVU.MOREX.r3.7HG0658180	HORVU.MOREX.r3.6HG0538500	HORVU.MOREX.r3.4HG0402810	HORVU.MOREX.r3.3HG0292220	HORVU.MOREX.r3.2HG0169520	HORVU.MOREX.r3.2HG0140060
HORVU.MOREX.r3.1HG0003270	HORVU.MOREX.r3.7HG0658190	HORVU.MOREX.r3.6HG0538520	HORVU.MOREX.r3.4HG0402830	HORVU.MOREX.r3.3HG0292230	HORVU.MOREX.r3.2HG0169530	HORVU.MOREX.r3.2HG0140090
HORVU.MOREX.r3.1HG0003280	HORVU.MOREX.r3.7HG0658210	HORVU.MOREX.r3.6HG0538580	HORVU.MOREX.r3.4HG0402840	HORVU.MOREX.r3.3HG0292240	HORVU.MOREX.r3.2HG0169540	HORVU.MOREX.r3.2HG0140130
HORVU.MOREX.r3.1HG0003290	HORVU.MOREX.r3.7HG0658220	HORVU.MOREX.r3.6HG0538650	HORVU.MOREX.r3.4HG0402850	HORVU.MOREX.r3.3HG0292260	HORVU.MOREX.r3.2HG0169570	HORVU.MOREX.r3.2HG0140140
HORVU.MOREX.r3.1HG0003300	HORVU.MOREX.r3.7HG0658260	HORVU.MOREX.r3.6HG0538660	HORVU.MOREX.r3.4HG0402860	HORVU.MOREX.r3.3HG0292270	HORVU.MOREX.r3.2HG0169580	HORVU.MOREX.r3.2HG0140170
HORVU.MOREX.r3.1HG0003310	HORVU.MOREX.r3.7HG0658270	HORVU.MOREX.r3.6HG0538670	HORVU.MOREX.r3.4HG0402870	HORVU.MOREX.r3.3HG0292280	HORVU.MOREX.r3.2HG0169610	HORVU.MOREX.r3.2HG0140180
HORVU.MOREX.r3.1HG0003380	HORVU.MOREX.r3.7HG0658290	HORVU.MOREX.r3.6HG0538720	HORVU.MOREX.r3.4HG0402900	HORVU.MOREX.r3.3HG0292330	HORVU.MOREX.r3.2HG0169630	HORVU.MOREX.r3.2HG0140190
HORVU.MOREX.r3.1HG0003390	HORVU.MOREX.r3.7HG0658300	HORVU.MOREX.r3.6HG0538740	HORVU.MOREX.r3.4HG0402920	HORVU.MOREX.r3.3HG0292340	HORVU.MOREX.r3.2HG0169650	HORVU.MOREX.r3.2HG0140290
HORVU.MOREX.r3.1HG0003410	HORVU.MOREX.r3.7HG0658320	HORVU.MOREX.r3.6HG0538760	HORVU.MOREX.r3.4HG0402930	HORVU.MOREX.r3.3HG0292350	HORVU.MOREX.r3.2HG0169670	HORVU.MOREX.r3.2HG0140330
HORVU.MOREX.r3.1HG0003430	HORVU.MOREX.r3.7HG0658330	HORVU.MOREX.r3.6HG0538770	HORVU.MOREX.r3.4HG0402940	HORVU.MOREX.r3.3HG0292380	HORVU.MOREX.r3.2HG0169680	HORVU.MOREX.r3.2HG0140380
HORVU.MOREX.r3.1HG0003440	HORVU.MOREX.r3.7HG0658340	HORVU.MOREX.r3.6HG0538780	HORVU.MOREX.r3.4HG0402960	HORVU.MOREX.r3.3HG0292390	HORVU.MOREX.r3.2HG0169690	HORVU.MOREX.r3.2HG0140390
HORVU.MOREX.r3.1HG0003450	HORVU.MOREX.r3.7HG0658350	HORVU.MOREX.r3.6HG0538790	HORVU.MOREX.r3.4HG0402980	HORVU.MOREX.r3.3HG0292400	HORVU.MOREX.r3.2HG0169700	HORVU.MOREX.r3.2HG0140420
HORVU.MOREX.r3.1HG0003470	HORVU.MOREX.r3.7HG0658370	HORVU.MOREX.r3.6HG0538800	HORVU.MOREX.r3.4HG0402990	HORVU.MOREX.r3.3HG0292410	HORVU.MOREX.r3.2HG0169710	HORVU.MOREX.r3.2HG0140430
HORVU.MOREX.r3.1HG0003490	HORVU.MOREX.r3.7HG0658390	HORVU.MOREX.r3.6HG0538810	HORVU.MOREX.r3.4HG0403000	HORVU.MOREX.r3.3HG0292430	HORVU.MOREX.r3.2HG0169720	HORVU.MOREX.r3.2HG0140440
HORVU.MOREX.r3.1HG0003520	HORVU.MOREX.r3.7HG0658420	HORVU.MOREX.r3.6HG0538870	HORVU.MOREX.r3.4HG0403010	HORVU.MOREX.r3.3HG0292450	HORVU.MOREX.r3.2HG0169770	HORVU.MOREX.r3.2HG0140450
HORVU.MOREX.r3.1HG0003550	HORVU.MOREX.r3.7HG0658430	HORVU.MOREX.r3.6HG0538880	HORVU.MOREX.r3.4HG0403020	HORVU.MOREX.r3.3HG0292470	HORVU.MOREX.r3.2HG0169780	HORVU.MOREX.r3.2HG0140470
HORVU.MOREX.r3.1HG0003580	HORVU.MOREX.r3.7HG0658440	HORVU.MOREX.r3.6HG0538890	HORVU.MOREX.r3.4HG0403040	HORVU.MOREX.r3.3HG0292480	HORVU.MOREX.r3.2HG0169800	HORVU.MOREX.r3.2HG0140480
HORVU.MOREX.r3.1HG0003590	HORVU.MOREX.r3.7HG0658450	HORVU.MOREX.r3.6HG0538930	HORVU.MOREX.r3.4HG0403060	HORVU.MOREX.r3.3HG0292490	HORVU.MOREX.r3.2HG0169810	HORVU.MOREX.r3.2HG0140500
HORVU.MOREX.r3.1HG0003600	HORVU.MOREX.r3.7HG0658460	HORVU.MOREX.r3.6HG0538940	HORVU.MOREX.r3.4HG0403070	HORVU.MOREX.r3.3HG0292500	HORVU.MOREX.r3.2HG0169820	HORVU.MOREX.r3.2HG0140540
HORVU.MOREX.r3.1HG0003610	HORVU.MOREX.r3.7HG0658470	HORVU.MOREX.r3.6HG0538960	HORVU.MOREX.r3.4HG0403080	HORVU.MOREX.r3.3HG0292540	HORVU.MOREX.r3.2HG0169830	HORVU.MOREX.r3.2HG0140550
HORVU.MOREX.r3.1HG0003620	HORVU.MOREX.r3.7HG0658480	HORVU.MOREX.r3.6HG0539000	HORVU.MOREX.r3.4HG0403090	HORVU.MOREX.r3.3HG0292560	HORVU.MOREX.r3.2HG0169880	HORVU.MOREX.r3.2HG0140600
HORVU.MOREX.r3.1HG0003630	HORVU.MOREX.r3.7HG0658550	HORVU.MOREX.r3.6HG0539010	HORVU.MOREX.r3.4HG0403100	HORVU.MOREX.r3.3HG0292580	HORVU.MOREX.r3.2HG0169900	HORVU.MOREX.r3.2HG0140610
HORVU.MOREX.r3.1HG0003650	HORVU.MOREX.r3.7HG0658560	HORVU.MOREX.r3.6HG0539020	HORVU.MOREX.r3.4HG0403110	HORVU.MOREX.r3.3HG0292590	HORVU.MOREX.r3.2HG0169920	HORVU.MOREX.r3.2HG0140700
HORVU.MOREX.r3.1HG0003660	HORVU.MOREX.r3.7HG0658580	HORVU.MOREX.r3.6HG0539050	HORVU.MOREX.r3.4HG0403120	HORVU.MOREX.r3.3HG0292600	HORVU.MOREX.r3.2HG0169970	HORVU.MOREX.r3.2HG0140720
HORVU.MOREX.r3.1HG0003690	HORVU.MOREX.r3.7HG0658590	HORVU.MOREX.r3.6HG0539060	HORVU.MOREX.r3.4HG0403130	HORVU.MOREX.r3.3HG0292610	HORVU.MOREX.r3.2HG0170000	HORVU.MOREX.r3.2HG0140730
HORVU.MOREX.r3.1HG0003700	HORVU.MOREX.r3.7HG0658600	HORVU.MOREX.r3.6HG0539080	HORVU.MOREX.r3.4HG0403140	HORVU.MOREX.r3.3HG0292630	HORVU.MOREX.r3.2HG0170030	HORVU.MOREX.r3.2HG0140740
HORVU.MOREX.r3.1HG0003710	HORVU.MOREX.r3.7HG0658610	HORVU.MOREX.r3.6HG0539100	HORVU.MOREX.r3.4HG0403180	HORVU.MOREX.r3.3HG0292640	HORVU.MOREX.r3.2HG0170050	HORVU.MOREX.r3.2HG0140780
HORVU.MOREX.r3.1HG0003720	HORVU.MOREX.r3.7HG0658630	HORVU.MOREX.r3.6HG0539110	HORVU.MOREX.r3.4HG0403200	HORVU.MOREX.r3.3HG0292650	HORVU.MOREX.r3.2HG0170080	HORVU.MOREX.r3.2HG0140790
HORVU.MOREX.r3.1HG0003780	HORVU.MOREX.r3.7HG0658650	HORVU.MOREX.r3.6HG0539130	HORVU.MOREX.r3.4HG0403210	HORVU.MOREX.r3.3HG0292680	HORVU.MOREX.r3.2HG0170090	HORVU.MOREX.r3.2HG0140820
HORVU.MOREX.r3.1HG0003800	HORVU.MOREX.r3.7HG0658660	HORVU.MOREX.r3.6HG0539140	HORVU.MOREX.r3.4HG0403230	HORVU.MOREX.r3.3HG0292700	HORVU.MOREX.r3.2HG0170110	HORVU.MOREX.r3.2HG0140830
HORVU.MOREX.r3.1HG0003810	HORVU.MOREX.r3.7HG0658700	HORVU.MOREX.r3.6HG0539150	HORVU.MOREX.r3.4HG0403260	HORVU.MOREX.r3.3HG0292710	HORVU.MOREX.r3.2HG0170120	HORVU.MOREX.r3.2HG0140860
HORVU.MOREX.r3.1HG0003820	HORVU.MOREX.r3.7HG0658710	HORVU.MOREX.r3.6HG0539170	HORVU.MOREX.r3.4HG0403290	HORVU.MOREX.r3.3HG0292770	HORVU.MOREX.r3.2HG0170160	HORVU.MOREX.r3.2HG0140870
HORVU.MOREX.r3.1HG0003860	HORVU.MOREX.r3.7HG0658720	HORVU.MOREX.r3.6HG0539180	HORVU.MOREX.r3.4HG0403310	HORVU.MOREX.r3.3HG0292790	HORVU.MOREX.r3.2HG0170170	HORVU.MOREX.r3.2HG0140880
HORVU.MOREX.r3.1HG0003870	HORVU.MOREX.r3.7HG0658750	HORVU.MOREX.r3.6HG0539190	HORVU.MOREX.r3.4HG0403320	HORVU.MOREX.r3.3HG0292800	HORVU.MOREX.r3.2HG0170210	HORVU.MOREX.r3.2HG0140890
HORVU.MOREX.r3.1HG0003890	HORVU.MOREX.r3.7HG0658760	HORVU.MOREX.r3.6HG0539200	HORVU.MOREX.r3.4HG0403360	HORVU.MOREX.r3.3HG0292810	HORVU.MOREX.r3.2HG0170230	HORVU.MOREX.r3.2HG0140950
HORVU.MOREX.r3.1HG0003900	HORVU.MOREX.r3.7HG0658770	HORVU.MOREX.r3.6HG0539210	HORVU.MOREX.r3.4HG0403370	HORVU.MOREX.r3.3HG0292830	HORVU.MOREX.r3.2HG0170240	HORVU.MOREX.r3.2HG0140960
HORVU.MOREX.r3.1HG0003910	HORVU.MOREX.r3.7HG0658780	HORVU.MOREX.r3.6HG0539220	HORVU.MOREX.r3.4HG0403380	HORVU.MOREX.r3.3HG0292850	HORVU.MOREX.r3.2HG0170250	HORVU.MOREX.r3.2HG0140970
HORVU.MOREX.r3.1HG0003920	HORVU.MOREX.r3.7HG0658790	HORVU.MOREX.r3.6HG0539230	HORVU.MOREX.r3.4HG0403400	HORVU.MOREX.r3.3HG0292900	HORVU.MOREX.r3.2HG0170260	HORVU.MOREX.r3.2HG0140980
HORVU.MOREX.r3.1HG0003950	HORVU.MOREX.r3.7HG0658800	HORVU.MOREX.r3.6HG0539240	HORVU.MOREX.r3.4HG0403410	HORVU.MOREX.r3.3HG0292910	HORVU.MOREX.r3.2HG0170290	HORVU.MOREX.r3.2HG0141000
HORVU.MOREX.r3.1HG0003970	HORVU.MOREX.r3.7HG0658820	HORVU.MOREX.r3.6HG0539260	HORVU.MOREX.r3.4HG0403420	HORVU.MOREX.r3.3HG0292920	HORVU.MOREX.r3.2HG0170300	HORVU.MOREX.r3.2HG0141040
HORVU.MOREX.r3.1HG0003980	HORVU.MOREX.r3.7HG0658830	HORVU.MOREX.r3.6HG0539280	HORVU.MOREX.r3.4HG0403430	HORVU.MOREX.r3.3HG0292960	HORVU.MOREX.r3.2HG0170320	HORVU.MOREX.r3.2HG0141070
HORVU.MOREX.r3.1HG0003990	HORVU.MOREX.r3.7HG0658840	HORVU.MOREX.r3.6HG0539320	HORVU.MOREX.r3.4HG0403440	HORVU.MOREX.r3.3HG0292990	HORVU.MOREX.r3.2HG0170350	HORVU.MOREX.r3.2HG0141140
HORVU.MOREX.r3.1HG0004000	HORVU.MOREX.r3.7HG0658860	HORVU.MOREX.r3.6HG0539330	HORVU.MOREX.r3.4HG0403460	HORVU.MOREX.r3.3HG0293000	HORVU.MOREX.r3.2HG0170360	HORVU.MOREX.r3.2HG0141190
HORVU.MOREX.r3.1HG0004020	HORVU.MOREX.r3.7HG0658870	HORVU.MOREX.r3.6HG0539340	HORVU.MOREX.r3.4HG0403480	HORVU.MOREX.r3.3HG0293010	HORVU.MOREX.r3.2HG0170370	HORVU.MOREX.r3.2HG0141200
HORVU.MOREX.r3.1HG0004030	HORVU.MOREX.r3.7HG0658890	HORVU.MOREX.r3.6HG0539350	HORVU.MOREX.r3.4HG0403490	HORVU.MOREX.r3.3HG0293040	HORVU.MOREX.r3.2HG0170390	HORVU.MOREX.r3.2HG0141230
HORVU.MOREX.r3.1HG0004060	HORVU.MOREX.r3.7HG0658900	HORVU.MOREX.r3.6HG0539360	HORVU.MOREX.r3.4HG0403510	HORVU.MOREX.r3.3HG0293070	HORVU.MOREX.r3.2HG0170400	HORVU.MOREX.r3.2HG0141250
HORVU.MOREX.r3.1HG0004110	HORVU.MOREX.r3.7HG0658930	HORVU.MOREX.r3.6HG0539390	HORVU.MOREX.r3.4HG0403530	HORVU.MOREX.r3.3HG0293080	HORVU.MOREX.r3.2HG0170420	HORVU.MOREX.r3.2HG0141260
HORVU.MOREX.r3.1HG0004130	HORVU.MOREX.r3.7HG0658950	HORVU.MOREX.r3.6HG0539400	HORVU.MOREX.r3.4HG0403560	HORVU.MOREX.r3.3HG0293090	HORVU.MOREX.r3.2HG0170460	HORVU.MOREX.r3.2HG0141270
HORVU.MOREX.r3.1HG0004150	HORVU.MOREX.r3.7HG0658960	HORVU.MOREX.r3.6HG0539410	HORVU.MOREX.r3.4HG0403580	HORVU.MOREX.r3.3HG0293100	HORVU.MOREX.r3.2HG0170470	HORVU.MOREX.r3.2HG0141300
HORVU.MOREX.r3.1HG0004160	HORVU.MOREX.r3.7HG0658990	HORVU.MOREX.r3.6HG0539420	HORVU.MOREX.r3.4HG0403590	HORVU.MOREX.r3.3HG0293130	HORVU.MOREX.r3.2HG0170510	HORVU.MOREX.r3.2HG0141370
HORVU.MOREX.r3.1HG0004210	HORVU.MOREX.r3.7HG0659020	HORVU.MOREX.r3.6HG0539430	HORVU.MOREX.r3.4HG0403610	HORVU.MOREX.r3.3HG0293160	HORVU.MOREX.r3.2HG0170550	HORVU.MOREX.r3.2HG0141400
HORVU.MOREX.r3.1HG0004220	HORVU.MOREX.r3.7HG0659030	HORVU.MOREX.r3.6HG0539440	HORVU.MOREX.r3.4HG0403620	HORVU.MOREX.r3.3HG0293180	HORVU.MOREX.r3.2HG0170560	HORVU.MOREX.r3.2HG0141420
HORVU.MOREX.r3.1HG0004230	HORVU.MOREX.r3.7HG0659040	HORVU.MOREX.r3.6HG0539460	HORVU.MOREX.r3.4HG0403670	HORVU.MOREX.r3.3HG0293210	HORVU.MOREX.r3.2HG0170570	HORVU.MOREX.r3.2HG0141430
HORVU.MOREX.r3.1HG0004240	HORVU.MOREX.r3.7HG0659050	HORVU.MOREX.r3.6HG0539470	HORVU.MOREX.r3.4HG0403680	HORVU.MOREX.r3.3HG0293240	HORVU.MOREX.r3.2HG0170580	HORVU.MOREX.r3.2HG0141470
HORVU.MOREX.r3.1HG0004250	HORVU.MOREX.r3.7HG0659060	HORVU.MOREX.r3.6HG0539480	HORVU.MOREX.r3.4HG0403690	HORVU.MOREX.r3.3HG0293250	HORVU.MOREX.r3.2HG0170590	HORVU.MOREX.r3.2HG0141480
HORVU.MOREX.r3.1HG0004260	HORVU.MOREX.r3.7HG0659080	HORVU.MOREX.r3.6HG0539500	HORVU.MOREX.r3.4HG0403700	HORVU.MOREX.r3.3HG0293260	HORVU.MOREX.r3.2HG0170600	HORVU.MOREX.r3.2HG0141490
HORVU.MOREX.r3.1HG0004270	HORVU.MOREX.r3.7HG0659090	HORVU.MOREX.r3.6HG0539510	HORVU.MOREX.r3.4HG0403740	HORVU.MOREX.r3.3HG0293290	HORVU.MOREX.r3.2HG0170610	HORVU.MOREX.r3.2HG0141500
HORVU.MOREX.r3.1HG0004280	HORVU.MOREX.r3.7HG0659120	HORVU.MOREX.r3.6HG0539520	HORVU.MOREX.r3.4HG0403750	HORVU.MOREX.r3.3HG0293310	HORVU.MOREX.r3.2HG0170620	HORVU.MOREX.r3.2HG0141530
HORVU.MOREX.r3.1HG0004290	HORVU.MOREX.r3.7HG0659130	HORVU.MOREX.r3.6HG0539540	HORVU.MOREX.r3.4HG0403760	HORVU.MOREX.r3.3HG0293360	HORVU.MOREX.r3.2HG0170640	HORVU.MOREX.r3.2HG0141580
HORVU.MOREX.r3.1HG0004300	HORVU.MOREX.r3.7HG0659160	HORVU.MOREX.r3.6HG0539550	HORVU.MOREX.r3.4HG0403770	HORVU.MOREX.r3.3HG0293390	HORVU.MOREX.r3.2HG0170670	HORVU.MOREX.r3.2HG0141620
HORVU.MOREX.r3.1HG0004310	HORVU.MOREX.r3.7HG0659200	HORVU.MOREX.r3.6HG0539560	HORVU.MOREX.r3.4HG0403790	HORVU.MOREX.r3.3HG0293400	HORVU.MOREX.r3.2HG0170690	HORVU.MOREX.r3.2HG0141660
HORVU.MOREX.r3.1HG0004320	HORVU.MOREX.r3.7HG0659220	HORVU.MOREX.r3.6HG0539570	HORVU.MOREX.r3.4HG0403800	HORVU.MOREX.r3.3HG0293410	HORVU.MOREX.r3.2HG0170740	HORVU.MOREX.r3.2HG0141680
HORVU.MOREX.r3.1HG0004340	HORVU.MOREX.r3.7HG0659250	HORVU.MOREX.r3.6HG0539580	HORVU.MOREX.r3.4HG0403810	HORVU.MOREX.r3.3HG0293420	HORVU.MOREX.r3.2HG0170750	HORVU.MOREX.r3.2HG0141690
HORVU.MOREX.r3.1HG0004350	HORVU.MOREX.r3.7HG0659270	HORVU.MOREX.r3.6HG0539590	HORVU.MOREX.r3.4HG0403850	HORVU.MOREX.r3.3HG0293430	HORVU.MOREX.r3.2HG0170760	HORVU.MOREX.r3.2HG0141710
HORVU.MOREX.r3.1HG0004370	HORVU.MOREX.r3.7HG0659280	HORVU.MOREX.r3.6HG0539600	HORVU.MOREX.r3.4HG0403860	HORVU.MOREX.r3.3HG0293440	HORVU.MOREX.r3.2HG0170810	HORVU.MOREX.r3.2HG0141740
HORVU.MOREX.r3.1HG0004380	HORVU.MOREX.r3.7HG0659290	HORVU.MOREX.r3.6HG0539760	HORVU.MOREX.r3.4HG0403870	HORVU.MOREX.r3.3HG0293450	HORVU.MOREX.r3.2HG0170820	HORVU.MOREX.r3.2HG0141780
HORVU.MOREX.r3.1HG0004410	HORVU.MOREX.r3.7HG0659300	HORVU.MOREX.r3.6HG0539780	HORVU.MOREX.r3.4HG0403910	HORVU.MOREX.r3.3HG0293480	HORVU.MOREX.r3.2HG0170840	HORVU.MOREX.r3.2HG0141870
HORVU.MOREX.r3.1HG0004440	HORVU.MOREX.r3.7HG0659310	HORVU.MOREX.r3.6HG0539790	HORVU.MOREX.r3.4HG0403930	HORVU.MOREX.r3.3HG0293490	HORVU.MOREX.r3.2HG0170860	HORVU.MOREX.r3.2HG0141880
HORVU.MOREX.r3.1HG0004450	HORVU.MOREX.r3.7HG0659320	HORVU.MOREX.r3.6HG0539830	HORVU.MOREX.r3.4HG0403940	HORVU.MOREX.r3.3HG0293500	HORVU.MOREX.r3.2HG0170880	HORVU.MOREX.r3.2HG0141900
HORVU.MOREX.r3.1HG0004460	HORVU.MOREX.r3.7HG0659330	HORVU.MOREX.r3.6HG0539850	HORVU.MOREX.r3.4HG0403950	HORVU.MOREX.r3.3HG0293510	HORVU.MOREX.r3.2HG0170890	HORVU.MOREX.r3.2HG0141980
HORVU.MOREX.r3.1HG0004490	HORVU.MOREX.r3.7HG0659340	HORVU.MOREX.r3.6HG0539870	HORVU.MOREX.r3.4HG0403960	HORVU.MOREX.r3.3HG0293530	HORVU.MOREX.r3.2HG0170900	HORVU.MOREX.r3.2HG0142000
HORVU.MOREX.r3.1HG0004520	HORVU.MOREX.r3.7HG0659360	HORVU.MOREX.r3.6HG0539880	HORVU.MOREX.r3.4HG0403970	HORVU.MOREX.r3.3HG0293540	HORVU.MOREX.r3.2HG0170910	HORVU.MOREX.r3.2HG0142030
HORVU.MOREX.r3.1HG0004540	HORVU.MOREX.r3.7HG0659370	HORVU.MOREX.r3.6HG0539900	HORVU.MOREX.r3.4HG0404000	HORVU.MOREX.r3.3HG0293550	HORVU.MOREX.r3.2HG0170920	HORVU.MOREX.r3.2HG0142070
HORVU.MOREX.r3.1HG0004550	HORVU.MOREX.r3.7HG0659390	HORVU.MOREX.r3.6HG0539930	HORVU.MOREX.r3.4HG0404010	HORVU.MOREX.r3.3HG0293560	HORVU.MOREX.r3.2HG0170930	HORVU.MOREX.r3.2HG0142100
HORVU.MOREX.r3.1HG0004560	HORVU.MOREX.r3.7HG0659400	HORVU.MOREX.r3.6HG0539970	HORVU.MOREX.r3.4HG0404020	HORVU.MOREX.r3.3HG0293570	HORVU.MOREX.r3.2HG0170940	HORVU.MOREX.r3.2HG0142150
HORVU.MOREX.r3.1HG0004600	HORVU.MOREX.r3.7HG0659410	HORVU.MOREX.r3.6HG0539980	HORVU.MOREX.r3.4HG0404030	HORVU.MOREX.r3.3HG0293580	HORVU.MOREX.r3.2HG0170990	HORVU.MOREX.r3.2HG0142190
HORVU.MOREX.r3.1HG0004610	HORVU.MOREX.r3.7HG0659440	HORVU.MOREX.r3.6HG0539990	HORVU.MOREX.r3.4HG0404040	HORVU.MOREX.r3.3HG0293650	HORVU.MOREX.r3.2HG0171020	HORVU.MOREX.r3.2HG0142250
HORVU.MOREX.r3.1HG0004640	HORVU.MOREX.r3.7HG0659450	HORVU.MOREX.r3.6HG0540010	HORVU.MOREX.r3.4HG0404080	HORVU.MOREX.r3.3HG0293660	HORVU.MOREX.r3.2HG0171030	HORVU.MOREX.r3.2HG0142300
HORVU.MOREX.r3.1HG0004650	HORVU.MOREX.r3.7HG0659470	HORVU.MOREX.r3.6HG0540020	HORVU.MOREX.r3.4HG0404100	HORVU.MOREX.r3.3HG0293670	HORVU.MOREX.r3.2HG0171070	HORVU.MOREX.r3.2HG0142310
HORVU.MOREX.r3.1HG0004660	HORVU.MOREX.r3.7HG0659490	HORVU.MOREX.r3.6HG0540030	HORVU.MOREX.r3.4HG0404110	HORVU.MOREX.r3.3HG0293680	HORVU.MOREX.r3.2HG0171080	HORVU.MOREX.r3.2HG0142440
HORVU.MOREX.r3.1HG0004670	HORVU.MOREX.r3.7HG0659510	HORVU.MOREX.r3.6HG0540040	HORVU.MOREX.r3.4HG0404120	HORVU.MOREX.r3.3HG0293700	HORVU.MOREX.r3.2HG0171090	HORVU.MOREX.r3.2HG0142450
HORVU.MOREX.r3.1HG0004690	HORVU.MOREX.r3.7HG0659520	HORVU.MOREX.r3.6HG0540050	HORVU.MOREX.r3.4HG0404130	HORVU.MOREX.r3.3HG0293760	HORVU.MOREX.r3.2HG0171100	HORVU.MOREX.r3.2HG0142490
HORVU.MOREX.r3.1HG0004700	HORVU.MOREX.r3.7HG0659530	HORVU.MOREX.r3.6HG0540080	HORVU.MOREX.r3.4HG0404170	HORVU.MOREX.r3.3HG0293770	HORVU.MOREX.r3.2HG0171130	HORVU.MOREX.r3.2HG0142500
HORVU.MOREX.r3.1HG0004730	HORVU.MOREX.r3.7HG0659560	HORVU.MOREX.r3.6HG0540090	HORVU.MOREX.r3.4HG0404190	HORVU.MOREX.r3.3HG0293780	HORVU.MOREX.r3.2HG0171160	HORVU.MOREX.r3.2HG0142510
HORVU.MOREX.r3.1HG0004780	HORVU.MOREX.r3.7HG0659570	HORVU.MOREX.r3.6HG0540100	HORVU.MOREX.r3.4HG0404220	HORVU.MOREX.r3.3HG0293790	HORVU.MOREX.r3.2HG0171170	HORVU.MOREX.r3.2HG0142540
HORVU.MOREX.r3.1HG0004840	HORVU.MOREX.r3.7HG0659590	HORVU.MOREX.r3.6HG0540130	HORVU.MOREX.r3.4HG0404270	HORVU.MOREX.r3.3HG0293820	HORVU.MOREX.r3.2HG0171180	HORVU.MOREX.r3.2HG0142550
HORVU.MOREX.r3.1HG0004870	HORVU.MOREX.r3.7HG0659600	HORVU.MOREX.r3.6HG0540160	HORVU.MOREX.r3.4HG0404290	HORVU.MOREX.r3.3HG0293830	HORVU.MOREX.r3.2HG0171210	HORVU.MOREX.r3.2HG0142570
HORVU.MOREX.r3.1HG0004880	HORVU.MOREX.r3.7HG0659610	HORVU.MOREX.r3.6HG0540170	HORVU.MOREX.r3.4HG0404300	HORVU.MOREX.r3.3HG0293840	HORVU.MOREX.r3.2HG0171220	HORVU.MOREX.r3.2HG0142590
HORVU.MOREX.r3.1HG0004890	HORVU.MOREX.r3.7HG0659620	HORVU.MOREX.r3.6HG0540180	HORVU.MOREX.r3.4HG0404310	HORVU.MOREX.r3.3HG0293850	HORVU.MOREX.r3.2HG0171260	HORVU.MOREX.r3.2HG0142660
HORVU.MOREX.r3.1HG0004910	HORVU.MOREX.r3.7HG0659640	HORVU.MOREX.r3.6HG0540190	HORVU.MOREX.r3.4HG0404330	HORVU.MOREX.r3.3HG0293880	HORVU.MOREX.r3.2HG0171270	HORVU.MOREX.r3.2HG0142680
HORVU.MOREX.r3.1HG0004940	HORVU.MOREX.r3.7HG0659650	HORVU.MOREX.r3.6HG0540200	HORVU.MOREX.r3.4HG0404340	HORVU.MOREX.r3.3HG0293900	HORVU.MOREX.r3.2HG0171300	HORVU.MOREX.r3.2HG0142740
HORVU.MOREX.r3.1HG0004990	HORVU.MOREX.r3.7HG0659660	HORVU.MOREX.r3.6HG0540230	HORVU.MOREX.r3.4HG0404380	HORVU.MOREX.r3.3HG0293910	HORVU.MOREX.r3.2HG0171340	HORVU.MOREX.r3.2HG0142760
HORVU.MOREX.r3.1HG0005000	HORVU.MOREX.r3.7HG0659670	HORVU.MOREX.r3.6HG0540250	HORVU.MOREX.r3.4HG0404390	HORVU.MOREX.r3.3HG0293920	HORVU.MOREX.r3.2HG0171420	HORVU.MOREX.r3.2HG0142770
HORVU.MOREX.r3.1HG0005040	HORVU.MOREX.r3.7HG0659680	HORVU.MOREX.r3.6HG0540280	HORVU.MOREX.r3.4HG0404410	HORVU.MOREX.r3.3HG0293930	HORVU.MOREX.r3.2HG0171440	HORVU.MOREX.r3.2HG0142850
HORVU.MOREX.r3.1HG0005060	HORVU.MOREX.r3.7HG0659690	HORVU.MOREX.r3.6HG0540290	HORVU.MOREX.r3.4HG0404420	HORVU.MOREX.r3.3HG0293940	HORVU.MOREX.r3.2HG0171450	HORVU.MOREX.r3.2HG0142950
HORVU.MOREX.r3.1HG0005070	HORVU.MOREX.r3.7HG0659710	HORVU.MOREX.r3.6HG0540300	HORVU.MOREX.r3.4HG0404450	HORVU.MOREX.r3.3HG0293950	HORVU.MOREX.r3.2HG0171480	HORVU.MOREX.r3.2HG0143100
HORVU.MOREX.r3.1HG0005090	HORVU.MOREX.r3.7HG0659730	HORVU.MOREX.r3.6HG0540310	HORVU.MOREX.r3.4HG0404460	HORVU.MOREX.r3.3HG0293970	HORVU.MOREX.r3.2HG0171490	HORVU.MOREX.r3.2HG0143170
HORVU.MOREX.r3.1HG0005110	HORVU.MOREX.r3.7HG0659740	HORVU.MOREX.r3.6HG0540320	HORVU.MOREX.r3.4HG0404490	HORVU.MOREX.r3.3HG0293980	HORVU.MOREX.r3.2HG0171500	HORVU.MOREX.r3.2HG0143200
HORVU.MOREX.r3.1HG0005130	HORVU.MOREX.r3.7HG0659760	HORVU.MOREX.r3.6HG0540340	HORVU.MOREX.r3.4HG0404500	HORVU.MOREX.r3.3HG0293990	HORVU.MOREX.r3.2HG0171520	HORVU.MOREX.r3.2HG0143220
HORVU.MOREX.r3.1HG0005170	HORVU.MOREX.r3.7HG0659770	HORVU.MOREX.r3.6HG0540350	HORVU.MOREX.r3.4HG0404530	HORVU.MOREX.r3.3HG0294000	HORVU.MOREX.r3.2HG0171550	HORVU.MOREX.r3.2HG0143230
HORVU.MOREX.r3.1HG0005190	HORVU.MOREX.r3.7HG0659780	HORVU.MOREX.r3.6HG0540360	HORVU.MOREX.r3.4HG0404540	HORVU.MOREX.r3.3HG0294040	HORVU.MOREX.r3.2HG0171580	HORVU.MOREX.r3.2HG0143250
HORVU.MOREX.r3.1HG0005200	HORVU.MOREX.r3.7HG0659800	HORVU.MOREX.r3.6HG0540370	HORVU.MOREX.r3.4HG0404560	HORVU.MOREX.r3.3HG0294050	HORVU.MOREX.r3.2HG0171590	HORVU.MOREX.r3.2HG0143260
HORVU.MOREX.r3.1HG0005210	HORVU.MOREX.r3.7HG0659830	HORVU.MOREX.r3.6HG0540390	HORVU.MOREX.r3.4HG0404590	HORVU.MOREX.r3.3HG0294060	HORVU.MOREX.r3.2HG0171600	HORVU.MOREX.r3.2HG0143310
HORVU.MOREX.r3.1HG0005220	HORVU.MOREX.r3.7HG0659840	HORVU.MOREX.r3.6HG0540400	HORVU.MOREX.r3.4HG0404600	HORVU.MOREX.r3.3HG0294070	HORVU.MOREX.r3.2HG0171610	HORVU.MOREX.r3.2HG0143320
HORVU.MOREX.r3.1HG0005230	HORVU.MOREX.r3.7HG0659850	HORVU.MOREX.r3.6HG0540420	HORVU.MOREX.r3.4HG0404620	HORVU.MOREX.r3.3HG0294080	HORVU.MOREX.r3.2HG0171620	HORVU.MOREX.r3.2HG0143380
HORVU.MOREX.r3.1HG0005240	HORVU.MOREX.r3.7HG0659860	HORVU.MOREX.r3.6HG0540430	HORVU.MOREX.r3.4HG0404630	HORVU.MOREX.r3.3HG0294100	HORVU.MOREX.r3.2HG0171630	HORVU.MOREX.r3.2HG0143560
HORVU.MOREX.r3.1HG0005250	HORVU.MOREX.r3.7HG0659870	HORVU.MOREX.r3.6HG0540470	HORVU.MOREX.r3.4HG0404680	HORVU.MOREX.r3.3HG0294110	HORVU.MOREX.r3.2HG0171650	HORVU.MOREX.r3.2HG0143570
HORVU.MOREX.r3.1HG0005260	HORVU.MOREX.r3.7HG0659910	HORVU.MOREX.r3.6HG0540480	HORVU.MOREX.r3.4HG0404690	HORVU.MOREX.r3.3HG0294140	HORVU.MOREX.r3.2HG0171670	HORVU.MOREX.r3.2HG0143630
HORVU.MOREX.r3.1HG0005270	HORVU.MOREX.r3.7HG0659920	HORVU.MOREX.r3.6HG0540490	HORVU.MOREX.r3.4HG0404700	HORVU.MOREX.r3.3HG0294160	HORVU.MOREX.r3.2HG0171680	HORVU.MOREX.r3.2HG0143650
HORVU.MOREX.r3.1HG0005340	HORVU.MOREX.r3.7HG0659930	HORVU.MOREX.r3.6HG0540500	HORVU.MOREX.r3.4HG0404710	HORVU.MOREX.r3.3HG0294170	HORVU.MOREX.r3.2HG0171690	HORVU.MOREX.r3.2HG0143690
HORVU.MOREX.r3.1HG0005350	HORVU.MOREX.r3.7HG0659950	HORVU.MOREX.r3.6HG0540510	HORVU.MOREX.r3.4HG0404720	HORVU.MOREX.r3.3HG0294190	HORVU.MOREX.r3.2HG0171720	HORVU.MOREX.r3.2HG0143700
HORVU.MOREX.r3.1HG0005360	HORVU.MOREX.r3.7HG0659970	HORVU.MOREX.r3.6HG0540520	HORVU.MOREX.r3.4HG0404730	HORVU.MOREX.r3.3HG0294230	HORVU.MOREX.r3.2HG0171730	HORVU.MOREX.r3.2HG0143760
HORVU.MOREX.r3.1HG0005370	HORVU.MOREX.r3.7HG0659980	HORVU.MOREX.r3.6HG0540530	HORVU.MOREX.r3.4HG0404740	HORVU.MOREX.r3.3HG0294240	HORVU.MOREX.r3.2HG0171740	HORVU.MOREX.r3.2HG0143770
HORVU.MOREX.r3.1HG0005380	HORVU.MOREX.r3.7HG0659990	HORVU.MOREX.r3.6HG0540540	HORVU.MOREX.r3.4HG0404750	HORVU.MOREX.r3.3HG0294260	HORVU.MOREX.r3.2HG0171750	HORVU.MOREX.r3.2HG0143780
HORVU.MOREX.r3.1HG0005390	HORVU.MOREX.r3.7HG0660010	HORVU.MOREX.r3.6HG0540580	HORVU.MOREX.r3.4HG0404760	HORVU.MOREX.r3.3HG0294270	HORVU.MOREX.r3.2HG0171780	HORVU.MOREX.r3.2HG0143790
HORVU.MOREX.r3.1HG0005400	HORVU.MOREX.r3.7HG0660070	HORVU.MOREX.r3.6HG0540590	HORVU.MOREX.r3.4HG0404770	HORVU.MOREX.r3.3HG0294280	HORVU.MOREX.r3.2HG0171790	HORVU.MOREX.r3.2HG0143800
HORVU.MOREX.r3.1HG0005410	HORVU.MOREX.r3.7HG0660080	HORVU.MOREX.r3.6HG0540610	HORVU.MOREX.r3.4HG0404780	HORVU.MOREX.r3.3HG0294290	HORVU.MOREX.r3.2HG0171810	HORVU.MOREX.r3.2HG0143810
HORVU.MOREX.r3.1HG0005420	HORVU.MOREX.r3.7HG0660090	HORVU.MOREX.r3.6HG0540650	HORVU.MOREX.r3.4HG0404810	HORVU.MOREX.r3.3HG0294300	HORVU.MOREX.r3.2HG0171820	HORVU.MOREX.r3.2HG0143820
HORVU.MOREX.r3.1HG0005430	HORVU.MOREX.r3.7HG0660140	HORVU.MOREX.r3.6HG0540670	HORVU.MOREX.r3.4HG0404840	HORVU.MOREX.r3.3HG0294310	HORVU.MOREX.r3.2HG0171890	HORVU.MOREX.r3.2HG0144000
HORVU.MOREX.r3.1HG0005440	HORVU.MOREX.r3.7HG0660160	HORVU.MOREX.r3.6HG0540690	HORVU.MOREX.r3.4HG0404850	HORVU.MOREX.r3.3HG0294340	HORVU.MOREX.r3.2HG0171900	HORVU.MOREX.r3.2HG0144020
HORVU.MOREX.r3.1HG0005450	HORVU.MOREX.r3.7HG0660210	HORVU.MOREX.r3.6HG0540710	HORVU.MOREX.r3.4HG0404880	HORVU.MOREX.r3.3HG0294370	HORVU.MOREX.r3.2HG0171910	HORVU.MOREX.r3.2HG0144100
HORVU.MOREX.r3.1HG0005480	HORVU.MOREX.r3.7HG0660260	HORVU.MOREX.r3.6HG0540720	HORVU.MOREX.r3.4HG0404900	HORVU.MOREX.r3.3HG0294380	HORVU.MOREX.r3.2HG0171920	HORVU.MOREX.r3.2HG0144110
HORVU.MOREX.r3.1HG0005490	HORVU.MOREX.r3.7HG0660270	HORVU.MOREX.r3.6HG0540760	HORVU.MOREX.r3.4HG0404910	HORVU.MOREX.r3.3HG0294390	HORVU.MOREX.r3.2HG0171930	HORVU.MOREX.r3.2HG0144220
HORVU.MOREX.r3.1HG0005580	HORVU.MOREX.r3.7HG0660290	HORVU.MOREX.r3.6HG0540780	HORVU.MOREX.r3.4HG0404920	HORVU.MOREX.r3.3HG0294420	HORVU.MOREX.r3.2HG0171980	HORVU.MOREX.r3.2HG0144230
HORVU.MOREX.r3.1HG0005590	HORVU.MOREX.r3.7HG0660300	HORVU.MOREX.r3.6HG0540810	HORVU.MOREX.r3.4HG0404940	HORVU.MOREX.r3.3HG0294430	HORVU.MOREX.r3.2HG0171990	HORVU.MOREX.r3.2HG0144280
HORVU.MOREX.r3.1HG0005600	HORVU.MOREX.r3.7HG0660310	HORVU.MOREX.r3.6HG0540820	HORVU.MOREX.r3.4HG0404970	HORVU.MOREX.r3.3HG0294440	HORVU.MOREX.r3.2HG0172010	HORVU.MOREX.r3.2HG0144330
HORVU.MOREX.r3.1HG0005610	HORVU.MOREX.r3.7HG0660380	HORVU.MOREX.r3.6HG0540840	HORVU.MOREX.r3.4HG0404980	HORVU.MOREX.r3.3HG0294450	HORVU.MOREX.r3.2HG0172020	HORVU.MOREX.r3.2HG0144390
HORVU.MOREX.r3.1HG0005620	HORVU.MOREX.r3.7HG0660400	HORVU.MOREX.r3.6HG0540870	HORVU.MOREX.r3.4HG0404990	HORVU.MOREX.r3.3HG0294460	HORVU.MOREX.r3.2HG0172030	HORVU.MOREX.r3.2HG0144420
HORVU.MOREX.r3.1HG0005640	HORVU.MOREX.r3.7HG0660420	HORVU.MOREX.r3.6HG0540880	HORVU.MOREX.r3.4HG0405000	HORVU.MOREX.r3.3HG0294470	HORVU.MOREX.r3.2HG0172050	HORVU.MOREX.r3.2HG0144430
HORVU.MOREX.r3.1HG0005660	HORVU.MOREX.r3.7HG0660430	HORVU.MOREX.r3.6HG0540900	HORVU.MOREX.r3.4HG0405010	HORVU.MOREX.r3.3HG0294490	HORVU.MOREX.r3.2HG0172080	HORVU.MOREX.r3.2HG0144440
HORVU.MOREX.r3.1HG0005680	HORVU.MOREX.r3.7HG0660440	HORVU.MOREX.r3.6HG0540910	HORVU.MOREX.r3.4HG0405020	HORVU.MOREX.r3.3HG0294500	HORVU.MOREX.r3.2HG0172110	HORVU.MOREX.r3.2HG0144460
HORVU.MOREX.r3.1HG0005700	HORVU.MOREX.r3.7HG0660510	HORVU.MOREX.r3.6HG0540930	HORVU.MOREX.r3.4HG0405050	HORVU.MOREX.r3.3HG0294530	HORVU.MOREX.r3.2HG0172120	HORVU.MOREX.r3.2HG0144470
HORVU.MOREX.r3.1HG0005720	HORVU.MOREX.r3.7HG0660530	HORVU.MOREX.r3.6HG0540940	HORVU.MOREX.r3.4HG0405070	HORVU.MOREX.r3.3HG0294540	HORVU.MOREX.r3.2HG0172130	HORVU.MOREX.r3.2HG0144560
HORVU.MOREX.r3.1HG0005730	HORVU.MOREX.r3.7HG0660550	HORVU.MOREX.r3.6HG0540950	HORVU.MOREX.r3.4HG0405080	HORVU.MOREX.r3.3HG0294550	HORVU.MOREX.r3.2HG0172140	HORVU.MOREX.r3.2HG0144600
HORVU.MOREX.r3.1HG0005750	HORVU.MOREX.r3.7HG0660620	HORVU.MOREX.r3.6HG0540980	HORVU.MOREX.r3.4HG0405090	HORVU.MOREX.r3.3HG0294590	HORVU.MOREX.r3.2HG0172180	HORVU.MOREX.r3.2HG0144620
HORVU.MOREX.r3.1HG0005760	HORVU.MOREX.r3.7HG0660640	HORVU.MOREX.r3.6HG0541020	HORVU.MOREX.r3.4HG0405100	HORVU.MOREX.r3.3HG0294620	HORVU.MOREX.r3.2HG0172190	HORVU.MOREX.r3.2HG0144760
HORVU.MOREX.r3.1HG0005770	HORVU.MOREX.r3.7HG0660650	HORVU.MOREX.r3.6HG0541030	HORVU.MOREX.r3.4HG0405110	HORVU.MOREX.r3.3HG0294630	HORVU.MOREX.r3.2HG0172200	HORVU.MOREX.r3.2HG0144770
HORVU.MOREX.r3.1HG0005780	HORVU.MOREX.r3.7HG0660660	HORVU.MOREX.r3.6HG0541040	HORVU.MOREX.r3.4HG0405120	HORVU.MOREX.r3.3HG0294650	HORVU.MOREX.r3.2HG0172230	HORVU.MOREX.r3.2HG0144810
HORVU.MOREX.r3.1HG0005790	HORVU.MOREX.r3.7HG0660720	HORVU.MOREX.r3.6HG0541050	HORVU.MOREX.r3.4HG0405130	HORVU.MOREX.r3.3HG0294660	HORVU.MOREX.r3.2HG0172280	HORVU.MOREX.r3.2HG0144830
HORVU.MOREX.r3.1HG0005810	HORVU.MOREX.r3.7HG0660730	HORVU.MOREX.r3.6HG0541060	HORVU.MOREX.r3.4HG0405160	HORVU.MOREX.r3.3HG0294690	HORVU.MOREX.r3.2HG0172290	HORVU.MOREX.r3.2HG0144860
HORVU.MOREX.r3.1HG0005830	HORVU.MOREX.r3.7HG0660750	HORVU.MOREX.r3.6HG0541070	HORVU.MOREX.r3.4HG0405170	HORVU.MOREX.r3.3HG0294710	HORVU.MOREX.r3.2HG0172300	HORVU.MOREX.r3.2HG0144920
HORVU.MOREX.r3.1HG0005840	HORVU.MOREX.r3.7HG0660760	HORVU.MOREX.r3.6HG0541100	HORVU.MOREX.r3.4HG0405190	HORVU.MOREX.r3.3HG0294720	HORVU.MOREX.r3.2HG0172320	HORVU.MOREX.r3.2HG0144990
HORVU.MOREX.r3.1HG0006070	HORVU.MOREX.r3.7HG0660830	HORVU.MOREX.r3.6HG0541110	HORVU.MOREX.r3.4HG0405200	HORVU.MOREX.r3.3HG0294740	HORVU.MOREX.r3.2HG0172360	HORVU.MOREX.r3.2HG0145010
HORVU.MOREX.r3.1HG0006080	HORVU.MOREX.r3.7HG0660840	HORVU.MOREX.r3.6HG0541120	HORVU.MOREX.r3.4HG0405230	HORVU.MOREX.r3.3HG0294770	HORVU.MOREX.r3.2HG0172380	HORVU.MOREX.r3.2HG0145080
HORVU.MOREX.r3.1HG0006090	HORVU.MOREX.r3.7HG0660850	HORVU.MOREX.r3.6HG0541150	HORVU.MOREX.r3.4HG0405240	HORVU.MOREX.r3.3HG0294780	HORVU.MOREX.r3.2HG0172390	HORVU.MOREX.r3.2HG0145140
HORVU.MOREX.r3.1HG0006100	HORVU.MOREX.r3.7HG0660880	HORVU.MOREX.r3.6HG0541160	HORVU.MOREX.r3.4HG0405270	HORVU.MOREX.r3.3HG0294790	HORVU.MOREX.r3.2HG0172400	HORVU.MOREX.r3.2HG0145150
HORVU.MOREX.r3.1HG0006110	HORVU.MOREX.r3.7HG0660900	HORVU.MOREX.r3.6HG0541170	HORVU.MOREX.r3.4HG0405310	HORVU.MOREX.r3.3HG0294800	HORVU.MOREX.r3.2HG0172420	HORVU.MOREX.r3.2HG0145190
HORVU.MOREX.r3.1HG0006120	HORVU.MOREX.r3.7HG0660920	HORVU.MOREX.r3.6HG0541190	HORVU.MOREX.r3.4HG0405320	HORVU.MOREX.r3.3HG0294810	HORVU.MOREX.r3.2HG0172430	HORVU.MOREX.r3.2HG0145220
HORVU.MOREX.r3.1HG0006130	HORVU.MOREX.r3.7HG0660950	HORVU.MOREX.r3.6HG0541240	HORVU.MOREX.r3.4HG0405350	HORVU.MOREX.r3.3HG0294820	HORVU.MOREX.r3.2HG0172450	HORVU.MOREX.r3.2HG0145330
HORVU.MOREX.r3.1HG0006160	HORVU.MOREX.r3.7HG0661010	HORVU.MOREX.r3.6HG0541250	HORVU.MOREX.r3.4HG0405370	HORVU.MOREX.r3.3HG0294830	HORVU.MOREX.r3.2HG0172460	HORVU.MOREX.r3.2HG0145350
HORVU.MOREX.r3.1HG0006210	HORVU.MOREX.r3.7HG0661030	HORVU.MOREX.r3.6HG0541270	HORVU.MOREX.r3.4HG0405380	HORVU.MOREX.r3.3HG0294840	HORVU.MOREX.r3.2HG0172490	HORVU.MOREX.r3.2HG0145360
HORVU.MOREX.r3.1HG0006230	HORVU.MOREX.r3.7HG0661060	HORVU.MOREX.r3.6HG0541280	HORVU.MOREX.r3.4HG0405390	HORVU.MOREX.r3.3HG0294850	HORVU.MOREX.r3.2HG0172510	HORVU.MOREX.r3.2HG0145370
HORVU.MOREX.r3.1HG0006310	HORVU.MOREX.r3.7HG0661070	HORVU.MOREX.r3.6HG0541290	HORVU.MOREX.r3.4HG0405400	HORVU.MOREX.r3.3HG0294880	HORVU.MOREX.r3.2HG0172520	HORVU.MOREX.r3.2HG0145390
HORVU.MOREX.r3.1HG0006340	HORVU.MOREX.r3.7HG0661150	HORVU.MOREX.r3.6HG0541340	HORVU.MOREX.r3.4HG0405410	HORVU.MOREX.r3.3HG0294900	HORVU.MOREX.r3.2HG0172540	HORVU.MOREX.r3.2HG0145430
HORVU.MOREX.r3.1HG0006400	HORVU.MOREX.r3.7HG0661180	HORVU.MOREX.r3.6HG0541360	HORVU.MOREX.r3.4HG0405420	HORVU.MOREX.r3.3HG0294930	HORVU.MOREX.r3.2HG0172550	HORVU.MOREX.r3.2HG0145440
HORVU.MOREX.r3.1HG0006410	HORVU.MOREX.r3.7HG0661200	HORVU.MOREX.r3.6HG0541370	HORVU.MOREX.r3.4HG0405440	HORVU.MOREX.r3.3HG0294950	HORVU.MOREX.r3.2HG0172560	HORVU.MOREX.r3.2HG0145460
HORVU.MOREX.r3.1HG0006420	HORVU.MOREX.r3.7HG0661210	HORVU.MOREX.r3.6HG0541380	HORVU.MOREX.r3.4HG0405450	HORVU.MOREX.r3.3HG0294960	HORVU.MOREX.r3.2HG0172580	HORVU.MOREX.r3.2HG0145470
HORVU.MOREX.r3.1HG0006430	HORVU.MOREX.r3.7HG0661250	HORVU.MOREX.r3.6HG0541400	HORVU.MOREX.r3.4HG0405470	HORVU.MOREX.r3.3HG0294970	HORVU.MOREX.r3.2HG0172630	HORVU.MOREX.r3.2HG0145480
HORVU.MOREX.r3.1HG0006440	HORVU.MOREX.r3.7HG0661290	HORVU.MOREX.r3.6HG0541410	HORVU.MOREX.r3.4HG0405490	HORVU.MOREX.r3.3HG0294980	HORVU.MOREX.r3.2HG0172640	HORVU.MOREX.r3.2HG0145500
HORVU.MOREX.r3.1HG0006450	HORVU.MOREX.r3.7HG0661350	HORVU.MOREX.r3.6HG0541440	HORVU.MOREX.r3.4HG0405500	HORVU.MOREX.r3.3HG0294990	HORVU.MOREX.r3.2HG0172690	HORVU.MOREX.r3.2HG0145510
HORVU.MOREX.r3.1HG0006460	HORVU.MOREX.r3.7HG0661420	HORVU.MOREX.r3.6HG0541450	HORVU.MOREX.r3.4HG0405530	HORVU.MOREX.r3.3HG0295000	HORVU.MOREX.r3.2HG0172730	HORVU.MOREX.r3.2HG0145580
HORVU.MOREX.r3.1HG0006480	HORVU.MOREX.r3.7HG0661450	HORVU.MOREX.r3.6HG0541490	HORVU.MOREX.r3.4HG0405560	HORVU.MOREX.r3.3HG0295020	HORVU.MOREX.r3.2HG0172750	HORVU.MOREX.r3.2HG0145600
HORVU.MOREX.r3.1HG0006490	HORVU.MOREX.r3.7HG0661460	HORVU.MOREX.r3.6HG0541500	HORVU.MOREX.r3.4HG0405580	HORVU.MOREX.r3.3HG0295030	HORVU.MOREX.r3.2HG0172760	HORVU.MOREX.r3.2HG0145620
HORVU.MOREX.r3.1HG0006500	HORVU.MOREX.r3.7HG0661470	HORVU.MOREX.r3.6HG0541510	HORVU.MOREX.r3.4HG0405600	HORVU.MOREX.r3.3HG0295040	HORVU.MOREX.r3.2HG0172770	HORVU.MOREX.r3.2HG0145630
HORVU.MOREX.r3.1HG0006530	HORVU.MOREX.r3.7HG0661480	HORVU.MOREX.r3.6HG0541540	HORVU.MOREX.r3.4HG0405620	HORVU.MOREX.r3.3HG0295050	HORVU.MOREX.r3.2HG0172780	HORVU.MOREX.r3.2HG0145640
HORVU.MOREX.r3.1HG0006570	HORVU.MOREX.r3.7HG0661490	HORVU.MOREX.r3.6HG0541550	HORVU.MOREX.r3.4HG0405640	HORVU.MOREX.r3.3HG0295060	HORVU.MOREX.r3.2HG0172790	HORVU.MOREX.r3.2HG0145720
HORVU.MOREX.r3.1HG0006580	HORVU.MOREX.r3.7HG0661530	HORVU.MOREX.r3.6HG0541560	HORVU.MOREX.r3.4HG0405650	HORVU.MOREX.r3.3HG0295100	HORVU.MOREX.r3.2HG0172800	HORVU.MOREX.r3.2HG0145750
HORVU.MOREX.r3.1HG0006610	HORVU.MOREX.r3.7HG0661570	HORVU.MOREX.r3.6HG0541570	HORVU.MOREX.r3.4HG0405690	HORVU.MOREX.r3.3HG0295140	HORVU.MOREX.r3.2HG0172810	HORVU.MOREX.r3.2HG0145810
HORVU.MOREX.r3.1HG0006630	HORVU.MOREX.r3.7HG0661580	HORVU.MOREX.r3.6HG0541580	HORVU.MOREX.r3.4HG0405710	HORVU.MOREX.r3.3HG0295150	HORVU.MOREX.r3.2HG0172820	HORVU.MOREX.r3.2HG0145830
HORVU.MOREX.r3.1HG0006650	HORVU.MOREX.r3.7HG0661600	HORVU.MOREX.r3.6HG0541590	HORVU.MOREX.r3.4HG0405730	HORVU.MOREX.r3.3HG0295160	HORVU.MOREX.r3.2HG0172870	HORVU.MOREX.r3.2HG0145850
HORVU.MOREX.r3.1HG0006660	HORVU.MOREX.r3.7HG0661610	HORVU.MOREX.r3.6HG0541630	HORVU.MOREX.r3.4HG0405740	HORVU.MOREX.r3.3HG0295200	HORVU.MOREX.r3.2HG0172880	HORVU.MOREX.r3.2HG0145950
HORVU.MOREX.r3.1HG0006690	HORVU.MOREX.r3.7HG0661620	HORVU.MOREX.r3.6HG0541650	HORVU.MOREX.r3.4HG0405750	HORVU.MOREX.r3.3HG0295210	HORVU.MOREX.r3.2HG0172900	HORVU.MOREX.r3.2HG0145970
HORVU.MOREX.r3.1HG0006720	HORVU.MOREX.r3.7HG0661630	HORVU.MOREX.r3.6HG0541660	HORVU.MOREX.r3.4HG0405780	HORVU.MOREX.r3.3HG0295230	HORVU.MOREX.r3.2HG0172940	HORVU.MOREX.r3.2HG0146010
HORVU.MOREX.r3.1HG0006730	HORVU.MOREX.r3.7HG0661640	HORVU.MOREX.r3.6HG0541690	HORVU.MOREX.r3.4HG0405790	HORVU.MOREX.r3.3HG0295240	HORVU.MOREX.r3.2HG0172980	HORVU.MOREX.r3.2HG0146050
HORVU.MOREX.r3.1HG0006740	HORVU.MOREX.r3.7HG0661680	HORVU.MOREX.r3.6HG0541700	HORVU.MOREX.r3.4HG0405810	HORVU.MOREX.r3.3HG0295250	HORVU.MOREX.r3.2HG0172990	HORVU.MOREX.r3.2HG0146060
HORVU.MOREX.r3.1HG0006770	HORVU.MOREX.r3.7HG0661690	HORVU.MOREX.r3.6HG0541730	HORVU.MOREX.r3.4HG0405830	HORVU.MOREX.r3.3HG0295260	HORVU.MOREX.r3.2HG0173040	HORVU.MOREX.r3.2HG0146160
HORVU.MOREX.r3.1HG0006780	HORVU.MOREX.r3.7HG0661770	HORVU.MOREX.r3.6HG0541740	HORVU.MOREX.r3.4HG0405850	HORVU.MOREX.r3.3HG0295270	HORVU.MOREX.r3.2HG0173050	HORVU.MOREX.r3.2HG0146180
HORVU.MOREX.r3.1HG0006820	HORVU.MOREX.r3.7HG0661830	HORVU.MOREX.r3.6HG0541750	HORVU.MOREX.r3.4HG0405860	HORVU.MOREX.r3.3HG0295280	HORVU.MOREX.r3.2HG0173060	HORVU.MOREX.r3.2HG0146220
HORVU.MOREX.r3.1HG0006840	HORVU.MOREX.r3.7HG0661870	HORVU.MOREX.r3.6HG0541760	HORVU.MOREX.r3.4HG0405870	HORVU.MOREX.r3.3HG0295310	HORVU.MOREX.r3.2HG0173080	HORVU.MOREX.r3.2HG0146330
HORVU.MOREX.r3.1HG0006880	HORVU.MOREX.r3.7HG0661880	HORVU.MOREX.r3.6HG0541770	HORVU.MOREX.r3.4HG0405890	HORVU.MOREX.r3.3HG0295330	HORVU.MOREX.r3.2HG0173090	HORVU.MOREX.r3.2HG0146350
HORVU.MOREX.r3.1HG0007100	HORVU.MOREX.r3.7HG0661890	HORVU.MOREX.r3.6HG0541780	HORVU.MOREX.r3.4HG0405900	HORVU.MOREX.r3.3HG0295350	HORVU.MOREX.r3.2HG0173100	HORVU.MOREX.r3.2HG0146360
HORVU.MOREX.r3.1HG0007110	HORVU.MOREX.r3.7HG0661910	HORVU.MOREX.r3.6HG0541790	HORVU.MOREX.r3.4HG0405920	HORVU.MOREX.r3.3HG0295370	HORVU.MOREX.r3.2HG0173120	HORVU.MOREX.r3.2HG0146470
HORVU.MOREX.r3.1HG0007160	HORVU.MOREX.r3.7HG0661920	HORVU.MOREX.r3.6HG0541800	HORVU.MOREX.r3.4HG0405930	HORVU.MOREX.r3.3HG0295400	HORVU.MOREX.r3.2HG0173160	HORVU.MOREX.r3.2HG0146520
HORVU.MOREX.r3.1HG0007170	HORVU.MOREX.r3.7HG0661950	HORVU.MOREX.r3.6HG0541850	HORVU.MOREX.r3.4HG0405940	HORVU.MOREX.r3.3HG0295480	HORVU.MOREX.r3.2HG0173170	HORVU.MOREX.r3.2HG0146530
HORVU.MOREX.r3.1HG0007200	HORVU.MOREX.r3.7HG0662000	HORVU.MOREX.r3.6HG0541860	HORVU.MOREX.r3.4HG0405950	HORVU.MOREX.r3.3HG0295500	HORVU.MOREX.r3.2HG0173180	HORVU.MOREX.r3.2HG0146580
HORVU.MOREX.r3.1HG0007220	HORVU.MOREX.r3.7HG0662020	HORVU.MOREX.r3.6HG0541890	HORVU.MOREX.r3.4HG0405960	HORVU.MOREX.r3.3HG0295520	HORVU.MOREX.r3.2HG0173190	HORVU.MOREX.r3.2HG0146690
HORVU.MOREX.r3.1HG0007230	HORVU.MOREX.r3.7HG0662030	HORVU.MOREX.r3.6HG0541910	HORVU.MOREX.r3.4HG0405970	HORVU.MOREX.r3.3HG0295530	HORVU.MOREX.r3.2HG0173200	HORVU.MOREX.r3.2HG0146720
HORVU.MOREX.r3.1HG0007240	HORVU.MOREX.r3.7HG0662040	HORVU.MOREX.r3.6HG0541920	HORVU.MOREX.r3.4HG0405990	HORVU.MOREX.r3.3HG0295540	HORVU.MOREX.r3.2HG0173210	HORVU.MOREX.r3.2HG0146750
HORVU.MOREX.r3.1HG0007250	HORVU.MOREX.r3.7HG0662060	HORVU.MOREX.r3.6HG0541940	HORVU.MOREX.r3.4HG0406000	HORVU.MOREX.r3.3HG0295550	HORVU.MOREX.r3.2HG0173220	HORVU.MOREX.r3.2HG0146870
HORVU.MOREX.r3.1HG0007280	HORVU.MOREX.r3.7HG0662080	HORVU.MOREX.r3.6HG0541950	HORVU.MOREX.r3.4HG0406020	HORVU.MOREX.r3.3HG0295570	HORVU.MOREX.r3.2HG0173230	HORVU.MOREX.r3.2HG0146900
HORVU.MOREX.r3.1HG0007290	HORVU.MOREX.r3.7HG0662090	HORVU.MOREX.r3.6HG0541960	HORVU.MOREX.r3.4HG0406030	HORVU.MOREX.r3.3HG0295580	HORVU.MOREX.r3.2HG0173240	HORVU.MOREX.r3.2HG0146920
HORVU.MOREX.r3.1HG0007300	HORVU.MOREX.r3.7HG0662100	HORVU.MOREX.r3.6HG0541970	HORVU.MOREX.r3.4HG0406050	HORVU.MOREX.r3.3HG0295590	HORVU.MOREX.r3.2HG0173270	HORVU.MOREX.r3.2HG0146930
HORVU.MOREX.r3.1HG0007320	HORVU.MOREX.r3.7HG0662110	HORVU.MOREX.r3.6HG0541980	HORVU.MOREX.r3.4HG0406060	HORVU.MOREX.r3.3HG0295600	HORVU.MOREX.r3.2HG0173290	HORVU.MOREX.r3.2HG0146940
HORVU.MOREX.r3.1HG0007330	HORVU.MOREX.r3.7HG0662120	HORVU.MOREX.r3.6HG0542020	HORVU.MOREX.r3.4HG0406070	HORVU.MOREX.r3.3HG0295610	HORVU.MOREX.r3.2HG0173330	HORVU.MOREX.r3.2HG0147020
HORVU.MOREX.r3.1HG0007340	HORVU.MOREX.r3.7HG0662130	HORVU.MOREX.r3.6HG0542030	HORVU.MOREX.r3.4HG0406080	HORVU.MOREX.r3.3HG0295640	HORVU.MOREX.r3.2HG0173340	HORVU.MOREX.r3.2HG0147090
HORVU.MOREX.r3.1HG0007360	HORVU.MOREX.r3.7HG0662160	HORVU.MOREX.r3.6HG0542040	HORVU.MOREX.r3.4HG0406090	HORVU.MOREX.r3.3HG0295660	HORVU.MOREX.r3.2HG0173350	HORVU.MOREX.r3.2HG0147100
HORVU.MOREX.r3.1HG0007370	HORVU.MOREX.r3.7HG0662180	HORVU.MOREX.r3.6HG0542050	HORVU.MOREX.r3.4HG0406100	HORVU.MOREX.r3.3HG0295670	HORVU.MOREX.r3.2HG0173360	HORVU.MOREX.r3.2HG0147120
HORVU.MOREX.r3.1HG0007460	HORVU.MOREX.r3.7HG0662190	HORVU.MOREX.r3.6HG0542070	HORVU.MOREX.r3.4HG0406110	HORVU.MOREX.r3.3HG0295680	HORVU.MOREX.r3.2HG0173380	HORVU.MOREX.r3.2HG0147140
HORVU.MOREX.r3.1HG0007510	HORVU.MOREX.r3.7HG0662200	HORVU.MOREX.r3.6HG0542090	HORVU.MOREX.r3.4HG0406120	HORVU.MOREX.r3.3HG0295690	HORVU.MOREX.r3.2HG0173390	HORVU.MOREX.r3.2HG0147190
HORVU.MOREX.r3.1HG0007520	HORVU.MOREX.r3.7HG0662210	HORVU.MOREX.r3.6HG0542100	HORVU.MOREX.r3.4HG0406130	HORVU.MOREX.r3.3HG0295710	HORVU.MOREX.r3.2HG0173400	HORVU.MOREX.r3.2HG0147210
HORVU.MOREX.r3.1HG0007570	HORVU.MOREX.r3.7HG0662220	HORVU.MOREX.r3.6HG0542110	HORVU.MOREX.r3.4HG0406140	HORVU.MOREX.r3.3HG0295730	HORVU.MOREX.r3.2HG0173410	HORVU.MOREX.r3.2HG0147270
HORVU.MOREX.r3.1HG0007590	HORVU.MOREX.r3.7HG0662250	HORVU.MOREX.r3.6HG0542120	HORVU.MOREX.r3.4HG0406150	HORVU.MOREX.r3.3HG0295760	HORVU.MOREX.r3.2HG0173440	HORVU.MOREX.r3.2HG0147280
HORVU.MOREX.r3.1HG0007600	HORVU.MOREX.r3.7HG0662260	HORVU.MOREX.r3.6HG0542140	HORVU.MOREX.r3.4HG0406180	HORVU.MOREX.r3.3HG0295830	HORVU.MOREX.r3.2HG0173480	HORVU.MOREX.r3.2HG0147580
HORVU.MOREX.r3.1HG0007610	HORVU.MOREX.r3.7HG0662280	HORVU.MOREX.r3.6HG0542170	HORVU.MOREX.r3.4HG0406190	HORVU.MOREX.r3.3HG0295840	HORVU.MOREX.r3.2HG0173500	HORVU.MOREX.r3.2HG0147590
HORVU.MOREX.r3.1HG0007620	HORVU.MOREX.r3.7HG0662290	HORVU.MOREX.r3.6HG0542210	HORVU.MOREX.r3.4HG0406210	HORVU.MOREX.r3.3HG0295850	HORVU.MOREX.r3.2HG0173510	HORVU.MOREX.r3.2HG0147760
HORVU.MOREX.r3.1HG0007630	HORVU.MOREX.r3.7HG0662310	HORVU.MOREX.r3.6HG0542230	HORVU.MOREX.r3.4HG0406220	HORVU.MOREX.r3.3HG0295860	HORVU.MOREX.r3.2HG0173520	HORVU.MOREX.r3.2HG0147770
HORVU.MOREX.r3.1HG0007690	HORVU.MOREX.r3.7HG0662330	HORVU.MOREX.r3.6HG0542240	HORVU.MOREX.r3.4HG0406250	HORVU.MOREX.r3.3HG0295870	HORVU.MOREX.r3.2HG0173530	HORVU.MOREX.r3.2HG0147790
HORVU.MOREX.r3.1HG0007700	HORVU.MOREX.r3.7HG0662340	HORVU.MOREX.r3.6HG0542250	HORVU.MOREX.r3.4HG0406280	HORVU.MOREX.r3.3HG0295880	HORVU.MOREX.r3.2HG0173540	HORVU.MOREX.r3.2HG0147830
HORVU.MOREX.r3.1HG0007740	HORVU.MOREX.r3.7HG0662360	HORVU.MOREX.r3.6HG0542260	HORVU.MOREX.r3.4HG0406300	HORVU.MOREX.r3.3HG0295890	HORVU.MOREX.r3.2HG0173550	HORVU.MOREX.r3.2HG0147880
HORVU.MOREX.r3.1HG0007770	HORVU.MOREX.r3.7HG0662370	HORVU.MOREX.r3.6HG0542290	HORVU.MOREX.r3.4HG0406310	HORVU.MOREX.r3.3HG0295900	HORVU.MOREX.r3.2HG0173560	HORVU.MOREX.r3.2HG0147980
HORVU.MOREX.r3.1HG0007840	HORVU.MOREX.r3.7HG0662380	HORVU.MOREX.r3.6HG0542300	HORVU.MOREX.r3.4HG0406350	HORVU.MOREX.r3.3HG0295950	HORVU.MOREX.r3.2HG0173600	HORVU.MOREX.r3.2HG0148010
HORVU.MOREX.r3.1HG0007850	HORVU.MOREX.r3.7HG0662400	HORVU.MOREX.r3.6HG0542310	HORVU.MOREX.r3.4HG0406380	HORVU.MOREX.r3.3HG0295960	HORVU.MOREX.r3.2HG0173620	HORVU.MOREX.r3.2HG0148030
HORVU.MOREX.r3.1HG0007900	HORVU.MOREX.r3.7HG0662420	HORVU.MOREX.r3.6HG0542320	HORVU.MOREX.r3.4HG0406390	HORVU.MOREX.r3.3HG0295980	HORVU.MOREX.r3.2HG0173630	HORVU.MOREX.r3.2HG0148050
HORVU.MOREX.r3.1HG0007910	HORVU.MOREX.r3.7HG0662430	HORVU.MOREX.r3.6HG0542330	HORVU.MOREX.r3.4HG0406400	HORVU.MOREX.r3.3HG0295990	HORVU.MOREX.r3.2HG0173660	HORVU.MOREX.r3.2HG0148060
HORVU.MOREX.r3.1HG0007940	HORVU.MOREX.r3.7HG0662440	HORVU.MOREX.r3.6HG0542340	HORVU.MOREX.r3.4HG0406410	HORVU.MOREX.r3.3HG0296010	HORVU.MOREX.r3.2HG0173670	HORVU.MOREX.r3.2HG0148070
HORVU.MOREX.r3.1HG0007950	HORVU.MOREX.r3.7HG0662450	HORVU.MOREX.r3.6HG0542350	HORVU.MOREX.r3.4HG0406420	HORVU.MOREX.r3.3HG0296030	HORVU.MOREX.r3.2HG0173680	HORVU.MOREX.r3.2HG0148110
HORVU.MOREX.r3.1HG0007970	HORVU.MOREX.r3.7HG0662480	HORVU.MOREX.r3.6HG0542370	HORVU.MOREX.r3.4HG0406450	HORVU.MOREX.r3.3HG0296050	HORVU.MOREX.r3.2HG0173700	HORVU.MOREX.r3.2HG0148170
HORVU.MOREX.r3.1HG0008000	HORVU.MOREX.r3.7HG0662490	HORVU.MOREX.r3.6HG0542380	HORVU.MOREX.r3.4HG0406470	HORVU.MOREX.r3.3HG0296060	HORVU.MOREX.r3.2HG0173710	HORVU.MOREX.r3.2HG0148240
HORVU.MOREX.r3.1HG0008070	HORVU.MOREX.r3.7HG0662500	HORVU.MOREX.r3.6HG0542390	HORVU.MOREX.r3.4HG0406500	HORVU.MOREX.r3.3HG0296070	HORVU.MOREX.r3.2HG0173720	HORVU.MOREX.r3.2HG0148280
HORVU.MOREX.r3.1HG0008080	HORVU.MOREX.r3.7HG0662550	HORVU.MOREX.r3.6HG0542400	HORVU.MOREX.r3.4HG0406540	HORVU.MOREX.r3.3HG0296090	HORVU.MOREX.r3.2HG0173730	HORVU.MOREX.r3.2HG0148300
HORVU.MOREX.r3.1HG0008100	HORVU.MOREX.r3.7HG0662560	HORVU.MOREX.r3.6HG0542410	HORVU.MOREX.r3.4HG0406550	HORVU.MOREX.r3.3HG0296100	HORVU.MOREX.r3.2HG0173750	HORVU.MOREX.r3.2HG0148310
HORVU.MOREX.r3.1HG0008130	HORVU.MOREX.r3.7HG0662590	HORVU.MOREX.r3.6HG0542430	HORVU.MOREX.r3.4HG0406560	HORVU.MOREX.r3.3HG0296120	HORVU.MOREX.r3.2HG0173800	HORVU.MOREX.r3.2HG0148440
HORVU.MOREX.r3.1HG0008140	HORVU.MOREX.r3.7HG0662620	HORVU.MOREX.r3.6HG0542460	HORVU.MOREX.r3.4HG0406580	HORVU.MOREX.r3.3HG0296140	HORVU.MOREX.r3.2HG0173820	HORVU.MOREX.r3.2HG0148470
HORVU.MOREX.r3.1HG0008150	HORVU.MOREX.r3.7HG0662630	HORVU.MOREX.r3.6HG0542480	HORVU.MOREX.r3.4HG0406590	HORVU.MOREX.r3.3HG0296150	HORVU.MOREX.r3.2HG0173850	HORVU.MOREX.r3.2HG0148520
HORVU.MOREX.r3.1HG0008160	HORVU.MOREX.r3.7HG0662650	HORVU.MOREX.r3.6HG0542490	HORVU.MOREX.r3.4HG0406600	HORVU.MOREX.r3.3HG0296170	HORVU.MOREX.r3.2HG0173870	HORVU.MOREX.r3.2HG0148570
HORVU.MOREX.r3.1HG0008290	HORVU.MOREX.r3.7HG0662670	HORVU.MOREX.r3.6HG0542550	HORVU.MOREX.r3.4HG0406620	HORVU.MOREX.r3.3HG0296180	HORVU.MOREX.r3.2HG0173880	HORVU.MOREX.r3.2HG0148610
HORVU.MOREX.r3.1HG0008310	HORVU.MOREX.r3.7HG0662690	HORVU.MOREX.r3.6HG0542560	HORVU.MOREX.r3.4HG0406630	HORVU.MOREX.r3.3HG0296240	HORVU.MOREX.r3.2HG0173890	HORVU.MOREX.r3.2HG0148670
HORVU.MOREX.r3.1HG0008320	HORVU.MOREX.r3.7HG0662710	HORVU.MOREX.r3.6HG0542570	HORVU.MOREX.r3.4HG0406650	HORVU.MOREX.r3.3HG0296260	HORVU.MOREX.r3.2HG0173930	HORVU.MOREX.r3.2HG0148720
HORVU.MOREX.r3.1HG0008380	HORVU.MOREX.r3.7HG0662720	HORVU.MOREX.r3.6HG0542580	HORVU.MOREX.r3.4HG0406670	HORVU.MOREX.r3.3HG0296270	HORVU.MOREX.r3.2HG0173950	HORVU.MOREX.r3.2HG0148840
HORVU.MOREX.r3.1HG0008390	HORVU.MOREX.r3.7HG0662760	HORVU.MOREX.r3.6HG0542590	HORVU.MOREX.r3.4HG0406710	HORVU.MOREX.r3.3HG0296280	HORVU.MOREX.r3.2HG0173960	HORVU.MOREX.r3.2HG0148850
HORVU.MOREX.r3.1HG0008400	HORVU.MOREX.r3.7HG0662780	HORVU.MOREX.r3.6HG0542610	HORVU.MOREX.r3.4HG0406770	HORVU.MOREX.r3.3HG0296300	HORVU.MOREX.r3.2HG0173970	HORVU.MOREX.r3.2HG0148880
HORVU.MOREX.r3.1HG0008410	HORVU.MOREX.r3.7HG0662800	HORVU.MOREX.r3.6HG0542620	HORVU.MOREX.r3.4HG0406790	HORVU.MOREX.r3.3HG0296310	HORVU.MOREX.r3.2HG0173980	HORVU.MOREX.r3.2HG0148990
HORVU.MOREX.r3.1HG0008440	HORVU.MOREX.r3.7HG0662830	HORVU.MOREX.r3.6HG0542640	HORVU.MOREX.r3.4HG0406800	HORVU.MOREX.r3.3HG0296320	HORVU.MOREX.r3.2HG0173990	HORVU.MOREX.r3.2HG0149060
HORVU.MOREX.r3.1HG0008450	HORVU.MOREX.r3.7HG0662840	HORVU.MOREX.r3.6HG0542660	HORVU.MOREX.r3.4HG0406870	HORVU.MOREX.r3.3HG0296330	HORVU.MOREX.r3.2HG0174000	HORVU.MOREX.r3.2HG0149110
HORVU.MOREX.r3.1HG0008460	HORVU.MOREX.r3.7HG0662880	HORVU.MOREX.r3.6HG0542670	HORVU.MOREX.r3.4HG0406880	HORVU.MOREX.r3.3HG0296370	HORVU.MOREX.r3.2HG0174010	HORVU.MOREX.r3.2HG0149120
HORVU.MOREX.r3.1HG0008470	HORVU.MOREX.r3.7HG0662920	HORVU.MOREX.r3.6HG0542700	HORVU.MOREX.r3.4HG0406900	HORVU.MOREX.r3.3HG0296380	HORVU.MOREX.r3.2HG0174020	HORVU.MOREX.r3.2HG0149130
HORVU.MOREX.r3.1HG0008490	HORVU.MOREX.r3.7HG0662930	HORVU.MOREX.r3.6HG0542720	HORVU.MOREX.r3.4HG0406920	HORVU.MOREX.r3.3HG0296400	HORVU.MOREX.r3.2HG0174030	HORVU.MOREX.r3.2HG0149220
HORVU.MOREX.r3.1HG0008500	HORVU.MOREX.r3.7HG0662940	HORVU.MOREX.r3.6HG0542730	HORVU.MOREX.r3.4HG0406930	HORVU.MOREX.r3.3HG0296410	HORVU.MOREX.r3.2HG0174050	HORVU.MOREX.r3.2HG0149390
HORVU.MOREX.r3.1HG0008510	HORVU.MOREX.r3.7HG0662960	HORVU.MOREX.r3.6HG0542750	HORVU.MOREX.r3.4HG0406950	HORVU.MOREX.r3.3HG0296420	HORVU.MOREX.r3.2HG0174060	HORVU.MOREX.r3.2HG0149410
HORVU.MOREX.r3.1HG0008520	HORVU.MOREX.r3.7HG0662970	HORVU.MOREX.r3.6HG0542760	HORVU.MOREX.r3.4HG0406960	HORVU.MOREX.r3.3HG0296430	HORVU.MOREX.r3.2HG0174080	HORVU.MOREX.r3.2HG0149510
HORVU.MOREX.r3.1HG0008600	HORVU.MOREX.r3.7HG0662990	HORVU.MOREX.r3.6HG0542770	HORVU.MOREX.r3.4HG0406970	HORVU.MOREX.r3.3HG0296440	HORVU.MOREX.r3.2HG0174090	HORVU.MOREX.r3.2HG0149600
HORVU.MOREX.r3.1HG0008610	HORVU.MOREX.r3.7HG0663000	HORVU.MOREX.r3.6HG0542780	HORVU.MOREX.r3.4HG0406980	HORVU.MOREX.r3.3HG0296450	HORVU.MOREX.r3.2HG0174110	HORVU.MOREX.r3.2HG0149770
HORVU.MOREX.r3.1HG0008620	HORVU.MOREX.r3.7HG0663010	HORVU.MOREX.r3.6HG0542790	HORVU.MOREX.r3.4HG0406990	HORVU.MOREX.r3.3HG0296480	HORVU.MOREX.r3.2HG0174120	HORVU.MOREX.r3.2HG0149820
HORVU.MOREX.r3.1HG0008630	HORVU.MOREX.r3.7HG0663020	HORVU.MOREX.r3.6HG0542860	HORVU.MOREX.r3.4HG0407010	HORVU.MOREX.r3.3HG0296490	HORVU.MOREX.r3.2HG0174140	HORVU.MOREX.r3.2HG0149860
HORVU.MOREX.r3.1HG0008640	HORVU.MOREX.r3.7HG0663040	HORVU.MOREX.r3.6HG0542870	HORVU.MOREX.r3.4HG0407020	HORVU.MOREX.r3.3HG0296500	HORVU.MOREX.r3.2HG0174160	HORVU.MOREX.r3.2HG0149940
HORVU.MOREX.r3.1HG0008650	HORVU.MOREX.r3.7HG0663060	HORVU.MOREX.r3.6HG0542880	HORVU.MOREX.r3.4HG0407030	HORVU.MOREX.r3.3HG0296510	HORVU.MOREX.r3.2HG0174170	HORVU.MOREX.r3.2HG0150100
HORVU.MOREX.r3.1HG0008660	HORVU.MOREX.r3.7HG0663070	HORVU.MOREX.r3.6HG0542900	HORVU.MOREX.r3.4HG0407060	HORVU.MOREX.r3.3HG0296520	HORVU.MOREX.r3.2HG0174190	HORVU.MOREX.r3.2HG0150110
HORVU.MOREX.r3.1HG0008680	HORVU.MOREX.r3.7HG0663080	HORVU.MOREX.r3.6HG0542910	HORVU.MOREX.r3.4HG0407080	HORVU.MOREX.r3.3HG0296530	HORVU.MOREX.r3.2HG0174210	HORVU.MOREX.r3.2HG0150230
HORVU.MOREX.r3.1HG0008690	HORVU.MOREX.r3.7HG0663100	HORVU.MOREX.r3.6HG0542940	HORVU.MOREX.r3.4HG0407100	HORVU.MOREX.r3.3HG0296610	HORVU.MOREX.r3.2HG0174240	HORVU.MOREX.r3.2HG0150240
HORVU.MOREX.r3.1HG0008790	HORVU.MOREX.r3.7HG0663130	HORVU.MOREX.r3.6HG0542950	HORVU.MOREX.r3.4HG0407110	HORVU.MOREX.r3.3HG0296620	HORVU.MOREX.r3.2HG0174250	HORVU.MOREX.r3.2HG0150260
HORVU.MOREX.r3.1HG0008810	HORVU.MOREX.r3.7HG0663140	HORVU.MOREX.r3.6HG0542960	HORVU.MOREX.r3.4HG0407120	HORVU.MOREX.r3.3HG0296630	HORVU.MOREX.r3.2HG0174270	HORVU.MOREX.r3.2HG0150450
HORVU.MOREX.r3.1HG0008820	HORVU.MOREX.r3.7HG0663150	HORVU.MOREX.r3.6HG0542970	HORVU.MOREX.r3.4HG0407130	HORVU.MOREX.r3.3HG0296680	HORVU.MOREX.r3.2HG0174280	HORVU.MOREX.r3.2HG0150520
HORVU.MOREX.r3.1HG0008840	HORVU.MOREX.r3.7HG0663200	HORVU.MOREX.r3.6HG0542980	HORVU.MOREX.r3.4HG0407140	HORVU.MOREX.r3.3HG0296700	HORVU.MOREX.r3.2HG0174310	HORVU.MOREX.r3.2HG0150530
HORVU.MOREX.r3.1HG0008860	HORVU.MOREX.r3.7HG0663270	HORVU.MOREX.r3.6HG0542990	HORVU.MOREX.r3.4HG0407160	HORVU.MOREX.r3.3HG0296720	HORVU.MOREX.r3.2HG0174320	HORVU.MOREX.r3.2HG0150570
HORVU.MOREX.r3.1HG0008890	HORVU.MOREX.r3.7HG0663280	HORVU.MOREX.r3.6HG0543100	HORVU.MOREX.r3.4HG0407180	HORVU.MOREX.r3.3HG0296730	HORVU.MOREX.r3.2HG0174340	HORVU.MOREX.r3.2HG0150600
HORVU.MOREX.r3.1HG0008900	HORVU.MOREX.r3.7HG0663320	HORVU.MOREX.r3.6HG0543110	HORVU.MOREX.r3.4HG0407190	HORVU.MOREX.r3.3HG0296750	HORVU.MOREX.r3.2HG0174350	HORVU.MOREX.r3.2HG0150710
HORVU.MOREX.r3.1HG0008910	HORVU.MOREX.r3.7HG0663350	HORVU.MOREX.r3.6HG0543130	HORVU.MOREX.r3.4HG0407200	HORVU.MOREX.r3.3HG0296770	HORVU.MOREX.r3.2HG0174360	HORVU.MOREX.r3.2HG0150720
HORVU.MOREX.r3.1HG0008930	HORVU.MOREX.r3.7HG0663360	HORVU.MOREX.r3.6HG0543140	HORVU.MOREX.r3.4HG0407210	HORVU.MOREX.r3.3HG0296830	HORVU.MOREX.r3.2HG0174390	HORVU.MOREX.r3.2HG0150730
HORVU.MOREX.r3.1HG0008950	HORVU.MOREX.r3.7HG0663370	HORVU.MOREX.r3.6HG0543150	HORVU.MOREX.r3.4HG0407230	HORVU.MOREX.r3.3HG0296840	HORVU.MOREX.r3.2HG0174410	HORVU.MOREX.r3.2HG0150820
HORVU.MOREX.r3.1HG0008980	HORVU.MOREX.r3.7HG0663380	HORVU.MOREX.r3.6HG0543170	HORVU.MOREX.r3.4HG0407270	HORVU.MOREX.r3.3HG0296850	HORVU.MOREX.r3.2HG0174420	HORVU.MOREX.r3.2HG0151030
HORVU.MOREX.r3.1HG0009000	HORVU.MOREX.r3.7HG0663390	HORVU.MOREX.r3.6HG0543180	HORVU.MOREX.r3.4HG0407280	HORVU.MOREX.r3.3HG0296860	HORVU.MOREX.r3.2HG0174440	HORVU.MOREX.r3.2HG0151050
HORVU.MOREX.r3.1HG0009020	HORVU.MOREX.r3.7HG0663400	HORVU.MOREX.r3.6HG0543200	HORVU.MOREX.r3.4HG0407290	HORVU.MOREX.r3.3HG0296870	HORVU.MOREX.r3.2HG0174470	HORVU.MOREX.r3.2HG0151200
HORVU.MOREX.r3.1HG0009050	HORVU.MOREX.r3.7HG0663410	HORVU.MOREX.r3.6HG0543250	HORVU.MOREX.r3.4HG0407300	HORVU.MOREX.r3.3HG0296880	HORVU.MOREX.r3.2HG0174480	HORVU.MOREX.r3.2HG0151240
HORVU.MOREX.r3.1HG0009100	HORVU.MOREX.r3.7HG0663430	HORVU.MOREX.r3.6HG0543260	HORVU.MOREX.r3.4HG0407310	HORVU.MOREX.r3.3HG0296900	HORVU.MOREX.r3.2HG0174500	HORVU.MOREX.r3.2HG0151290
HORVU.MOREX.r3.1HG0009110	HORVU.MOREX.r3.7HG0663440	HORVU.MOREX.r3.6HG0543300	HORVU.MOREX.r3.4HG0407330	HORVU.MOREX.r3.3HG0296910	HORVU.MOREX.r3.2HG0174510	HORVU.MOREX.r3.2HG0151360
HORVU.MOREX.r3.1HG0009120	HORVU.MOREX.r3.7HG0663470	HORVU.MOREX.r3.6HG0543310	HORVU.MOREX.r3.4HG0407340	HORVU.MOREX.r3.3HG0296930	HORVU.MOREX.r3.2HG0174530	HORVU.MOREX.r3.2HG0151370
HORVU.MOREX.r3.1HG0009210	HORVU.MOREX.r3.7HG0663500	HORVU.MOREX.r3.6HG0543320	HORVU.MOREX.r3.4HG0407360	HORVU.MOREX.r3.3HG0296940	HORVU.MOREX.r3.2HG0174550	HORVU.MOREX.r3.2HG0151430
HORVU.MOREX.r3.1HG0009220	HORVU.MOREX.r3.7HG0663510	HORVU.MOREX.r3.6HG0543350	HORVU.MOREX.r3.4HG0407380	HORVU.MOREX.r3.3HG0296950	HORVU.MOREX.r3.2HG0174560	HORVU.MOREX.r3.2HG0151470
HORVU.MOREX.r3.1HG0009270	HORVU.MOREX.r3.7HG0663520	HORVU.MOREX.r3.6HG0543360	HORVU.MOREX.r3.4HG0407390	HORVU.MOREX.r3.3HG0296960	HORVU.MOREX.r3.2HG0174570	HORVU.MOREX.r3.2HG0151490
HORVU.MOREX.r3.1HG0009360	HORVU.MOREX.r3.7HG0663530	HORVU.MOREX.r3.6HG0543370	HORVU.MOREX.r3.4HG0407410	HORVU.MOREX.r3.3HG0296980	HORVU.MOREX.r3.2HG0174600	HORVU.MOREX.r3.2HG0151500
HORVU.MOREX.r3.1HG0009380	HORVU.MOREX.r3.7HG0663540	HORVU.MOREX.r3.6HG0543380	HORVU.MOREX.r3.4HG0407420	HORVU.MOREX.r3.3HG0296990	HORVU.MOREX.r3.2HG0174610	HORVU.MOREX.r3.2HG0151540
HORVU.MOREX.r3.1HG0009390	HORVU.MOREX.r3.7HG0663550	HORVU.MOREX.r3.6HG0543390	HORVU.MOREX.r3.4HG0407450	HORVU.MOREX.r3.3HG0297000	HORVU.MOREX.r3.2HG0174620	HORVU.MOREX.r3.2HG0151560
HORVU.MOREX.r3.1HG0009400	HORVU.MOREX.r3.7HG0663560	HORVU.MOREX.r3.6HG0543400	HORVU.MOREX.r3.4HG0407460	HORVU.MOREX.r3.3HG0297010	HORVU.MOREX.r3.2HG0174630	HORVU.MOREX.r3.2HG0151580
HORVU.MOREX.r3.1HG0009420	HORVU.MOREX.r3.7HG0663570	HORVU.MOREX.r3.6HG0543410	HORVU.MOREX.r3.4HG0407470	HORVU.MOREX.r3.3HG0297030	HORVU.MOREX.r3.2HG0174650	HORVU.MOREX.r3.2HG0151600
HORVU.MOREX.r3.1HG0009450	HORVU.MOREX.r3.7HG0663610	HORVU.MOREX.r3.6HG0543440	HORVU.MOREX.r3.4HG0407500	HORVU.MOREX.r3.3HG0297050	HORVU.MOREX.r3.2HG0174680	HORVU.MOREX.r3.2HG0151690
HORVU.MOREX.r3.1HG0009460	HORVU.MOREX.r3.7HG0663620	HORVU.MOREX.r3.6HG0543450	HORVU.MOREX.r3.4HG0407520	HORVU.MOREX.r3.3HG0297100	HORVU.MOREX.r3.2HG0174700	HORVU.MOREX.r3.2HG0151710
HORVU.MOREX.r3.1HG0009470	HORVU.MOREX.r3.7HG0663640	HORVU.MOREX.r3.6HG0543460	HORVU.MOREX.r3.4HG0407530	HORVU.MOREX.r3.3HG0297110	HORVU.MOREX.r3.2HG0174740	HORVU.MOREX.r3.2HG0151730
HORVU.MOREX.r3.1HG0009480	HORVU.MOREX.r3.7HG0663650	HORVU.MOREX.r3.6HG0543480	HORVU.MOREX.r3.4HG0407540	HORVU.MOREX.r3.3HG0297140	HORVU.MOREX.r3.2HG0174750	HORVU.MOREX.r3.2HG0151760
HORVU.MOREX.r3.1HG0009490	HORVU.MOREX.r3.7HG0663670	HORVU.MOREX.r3.6HG0543490	HORVU.MOREX.r3.4HG0407550	HORVU.MOREX.r3.3HG0297170	HORVU.MOREX.r3.2HG0174760	HORVU.MOREX.r3.2HG0151770
HORVU.MOREX.r3.1HG0009610	HORVU.MOREX.r3.7HG0663690	HORVU.MOREX.r3.6HG0543500	HORVU.MOREX.r3.4HG0407560	HORVU.MOREX.r3.3HG0297180	HORVU.MOREX.r3.2HG0174770	HORVU.MOREX.r3.2HG0151810
HORVU.MOREX.r3.1HG0009630	HORVU.MOREX.r3.7HG0663700	HORVU.MOREX.r3.6HG0543510	HORVU.MOREX.r3.4HG0407580	HORVU.MOREX.r3.3HG0297190	HORVU.MOREX.r3.2HG0174810	HORVU.MOREX.r3.2HG0151930
HORVU.MOREX.r3.1HG0009640	HORVU.MOREX.r3.7HG0663720	HORVU.MOREX.r3.6HG0543520	HORVU.MOREX.r3.4HG0407590	HORVU.MOREX.r3.3HG0297270	HORVU.MOREX.r3.2HG0174820	HORVU.MOREX.r3.2HG0151960
HORVU.MOREX.r3.1HG0009650	HORVU.MOREX.r3.7HG0663730	HORVU.MOREX.r3.6HG0543540	HORVU.MOREX.r3.4HG0407600	HORVU.MOREX.r3.3HG0297280	HORVU.MOREX.r3.2HG0174840	HORVU.MOREX.r3.2HG0151970
HORVU.MOREX.r3.1HG0009670	HORVU.MOREX.r3.7HG0663740	HORVU.MOREX.r3.6HG0543550	HORVU.MOREX.r3.4HG0407610	HORVU.MOREX.r3.3HG0297290	HORVU.MOREX.r3.2HG0174850	HORVU.MOREX.r3.2HG0152090
HORVU.MOREX.r3.1HG0009680	HORVU.MOREX.r3.7HG0663750	HORVU.MOREX.r3.6HG0543560	HORVU.MOREX.r3.4HG0407640	HORVU.MOREX.r3.3HG0297330	HORVU.MOREX.r3.2HG0174860	HORVU.MOREX.r3.2HG0152100
HORVU.MOREX.r3.1HG0009730	HORVU.MOREX.r3.7HG0663760	HORVU.MOREX.r3.6HG0543570	HORVU.MOREX.r3.4HG0407650	HORVU.MOREX.r3.3HG0297350	HORVU.MOREX.r3.2HG0174880	HORVU.MOREX.r3.2HG0152110
HORVU.MOREX.r3.1HG0009740	HORVU.MOREX.r3.7HG0663790	HORVU.MOREX.r3.6HG0543580	HORVU.MOREX.r3.4HG0407670	HORVU.MOREX.r3.3HG0297360	HORVU.MOREX.r3.2HG0174890	HORVU.MOREX.r3.2HG0152140
HORVU.MOREX.r3.1HG0009760	HORVU.MOREX.r3.7HG0663800	HORVU.MOREX.r3.6HG0543590	HORVU.MOREX.r3.4HG0407700	HORVU.MOREX.r3.3HG0297370	HORVU.MOREX.r3.2HG0174920	HORVU.MOREX.r3.2HG0152150
HORVU.MOREX.r3.1HG0009770	HORVU.MOREX.r3.7HG0663810	HORVU.MOREX.r3.6HG0543600	HORVU.MOREX.r3.4HG0407720	HORVU.MOREX.r3.3HG0297400	HORVU.MOREX.r3.2HG0174930	HORVU.MOREX.r3.2HG0152160
HORVU.MOREX.r3.1HG0009810	HORVU.MOREX.r3.7HG0663840	HORVU.MOREX.r3.6HG0543610	HORVU.MOREX.r3.4HG0407730	HORVU.MOREX.r3.3HG0297410	HORVU.MOREX.r3.2HG0174980	HORVU.MOREX.r3.2HG0152170
HORVU.MOREX.r3.1HG0009860	HORVU.MOREX.r3.7HG0663850	HORVU.MOREX.r3.6HG0543620	HORVU.MOREX.r3.4HG0407740	HORVU.MOREX.r3.3HG0297450	HORVU.MOREX.r3.2HG0174990	HORVU.MOREX.r3.2HG0152180
HORVU.MOREX.r3.1HG0009870	HORVU.MOREX.r3.7HG0663860	HORVU.MOREX.r3.6HG0543630	HORVU.MOREX.r3.4HG0407750	HORVU.MOREX.r3.3HG0297460	HORVU.MOREX.r3.2HG0175000	HORVU.MOREX.r3.2HG0152230
HORVU.MOREX.r3.1HG0009920	HORVU.MOREX.r3.7HG0663870	HORVU.MOREX.r3.6HG0543660	HORVU.MOREX.r3.4HG0407760	HORVU.MOREX.r3.3HG0297470	HORVU.MOREX.r3.2HG0175010	HORVU.MOREX.r3.2HG0152280
HORVU.MOREX.r3.1HG0009930	HORVU.MOREX.r3.7HG0663880	HORVU.MOREX.r3.6HG0543700	HORVU.MOREX.r3.4HG0407780	HORVU.MOREX.r3.3HG0297500	HORVU.MOREX.r3.2HG0175020	HORVU.MOREX.r3.2HG0152330
HORVU.MOREX.r3.1HG0009940	HORVU.MOREX.r3.7HG0663900	HORVU.MOREX.r3.6HG0543720	HORVU.MOREX.r3.4HG0407790	HORVU.MOREX.r3.3HG0297530	HORVU.MOREX.r3.2HG0175040	HORVU.MOREX.r3.2HG0152370
HORVU.MOREX.r3.1HG0009950	HORVU.MOREX.r3.7HG0663920	HORVU.MOREX.r3.6HG0543730	HORVU.MOREX.r3.4HG0407800	HORVU.MOREX.r3.3HG0297540	HORVU.MOREX.r3.2HG0175070	HORVU.MOREX.r3.2HG0152380
HORVU.MOREX.r3.1HG0009960	HORVU.MOREX.r3.7HG0663940	HORVU.MOREX.r3.6HG0543740	HORVU.MOREX.r3.4HG0407810	HORVU.MOREX.r3.3HG0297550	HORVU.MOREX.r3.2HG0175090	HORVU.MOREX.r3.2HG0152400
HORVU.MOREX.r3.1HG0010020	HORVU.MOREX.r3.7HG0663950	HORVU.MOREX.r3.6HG0543750	HORVU.MOREX.r3.4HG0407820	HORVU.MOREX.r3.3HG0297560	HORVU.MOREX.r3.2HG0175100	HORVU.MOREX.r3.2HG0152430
HORVU.MOREX.r3.1HG0010030	HORVU.MOREX.r3.7HG0663970	HORVU.MOREX.r3.6HG0543770	HORVU.MOREX.r3.4HG0407830	HORVU.MOREX.r3.3HG0297570	HORVU.MOREX.r3.2HG0175110	HORVU.MOREX.r3.2HG0152460
HORVU.MOREX.r3.1HG0010060	HORVU.MOREX.r3.7HG0663980	HORVU.MOREX.r3.6HG0543780	HORVU.MOREX.r3.4HG0407840	HORVU.MOREX.r3.3HG0297580	HORVU.MOREX.r3.2HG0175130	HORVU.MOREX.r3.2HG0152470
HORVU.MOREX.r3.1HG0010070	HORVU.MOREX.r3.7HG0663990	HORVU.MOREX.r3.6HG0543790	HORVU.MOREX.r3.4HG0407880	HORVU.MOREX.r3.3HG0297600	HORVU.MOREX.r3.2HG0175150	HORVU.MOREX.r3.2HG0152520
HORVU.MOREX.r3.1HG0010080	HORVU.MOREX.r3.7HG0664000	HORVU.MOREX.r3.6HG0543800	HORVU.MOREX.r3.4HG0407890	HORVU.MOREX.r3.3HG0297610	HORVU.MOREX.r3.2HG0175170	HORVU.MOREX.r3.2HG0152530
HORVU.MOREX.r3.1HG0010090	HORVU.MOREX.r3.7HG0664010	HORVU.MOREX.r3.6HG0543810	HORVU.MOREX.r3.4HG0407900	HORVU.MOREX.r3.3HG0297620	HORVU.MOREX.r3.2HG0175180	HORVU.MOREX.r3.2HG0152540
HORVU.MOREX.r3.1HG0010130	HORVU.MOREX.r3.7HG0664030	HORVU.MOREX.r3.6HG0543830	HORVU.MOREX.r3.4HG0407940	HORVU.MOREX.r3.3HG0297650	HORVU.MOREX.r3.2HG0175210	HORVU.MOREX.r3.2HG0152610
HORVU.MOREX.r3.1HG0010140	HORVU.MOREX.r3.7HG0664050	HORVU.MOREX.r3.6HG0543870	HORVU.MOREX.r3.4HG0407950	HORVU.MOREX.r3.3HG0297660	HORVU.MOREX.r3.2HG0175220	HORVU.MOREX.r3.2HG0152640
HORVU.MOREX.r3.1HG0010170	HORVU.MOREX.r3.7HG0664070	HORVU.MOREX.r3.6HG0543880	HORVU.MOREX.r3.4HG0407970	HORVU.MOREX.r3.3HG0297680	HORVU.MOREX.r3.2HG0175290	HORVU.MOREX.r3.2HG0152650
HORVU.MOREX.r3.1HG0010270	HORVU.MOREX.r3.7HG0664080	HORVU.MOREX.r3.6HG0543900	HORVU.MOREX.r3.4HG0407980	HORVU.MOREX.r3.3HG0297690	HORVU.MOREX.r3.2HG0175320	HORVU.MOREX.r3.2HG0152860
HORVU.MOREX.r3.1HG0010310	HORVU.MOREX.r3.7HG0664110	HORVU.MOREX.r3.6HG0543920	HORVU.MOREX.r3.4HG0407990	HORVU.MOREX.r3.3HG0297700	HORVU.MOREX.r3.2HG0175340	HORVU.MOREX.r3.2HG0152870
HORVU.MOREX.r3.1HG0010330	HORVU.MOREX.r3.7HG0664130	HORVU.MOREX.r3.6HG0543930	HORVU.MOREX.r3.4HG0408000	HORVU.MOREX.r3.3HG0297720	HORVU.MOREX.r3.2HG0175350	HORVU.MOREX.r3.2HG0152880
HORVU.MOREX.r3.1HG0010340	HORVU.MOREX.r3.7HG0664150	HORVU.MOREX.r3.6HG0543940	HORVU.MOREX.r3.4HG0408010	HORVU.MOREX.r3.3HG0297730	HORVU.MOREX.r3.2HG0175380	HORVU.MOREX.r3.2HG0152890
HORVU.MOREX.r3.1HG0010350	HORVU.MOREX.r3.7HG0664160	HORVU.MOREX.r3.6HG0543950	HORVU.MOREX.r3.4HG0408030	HORVU.MOREX.r3.3HG0297740	HORVU.MOREX.r3.2HG0175420	HORVU.MOREX.r3.2HG0152910
HORVU.MOREX.r3.1HG0010370	HORVU.MOREX.r3.7HG0664180	HORVU.MOREX.r3.6HG0543960	HORVU.MOREX.r3.4HG0408040	HORVU.MOREX.r3.3HG0297750	HORVU.MOREX.r3.2HG0175440	HORVU.MOREX.r3.2HG0152970
HORVU.MOREX.r3.1HG0010380	HORVU.MOREX.r3.7HG0664230	HORVU.MOREX.r3.6HG0543970	HORVU.MOREX.r3.4HG0408050	HORVU.MOREX.r3.3HG0297780	HORVU.MOREX.r3.2HG0175450	HORVU.MOREX.r3.2HG0153000
HORVU.MOREX.r3.1HG0010400	HORVU.MOREX.r3.7HG0664240	HORVU.MOREX.r3.6HG0544080	HORVU.MOREX.r3.4HG0408060	HORVU.MOREX.r3.3HG0297800	HORVU.MOREX.r3.2HG0175460	HORVU.MOREX.r3.2HG0153010
HORVU.MOREX.r3.1HG0010450	HORVU.MOREX.r3.7HG0664250	HORVU.MOREX.r3.6HG0544100	HORVU.MOREX.r3.4HG0408070	HORVU.MOREX.r3.3HG0297820	HORVU.MOREX.r3.2HG0175510	HORVU.MOREX.r3.2HG0153120
HORVU.MOREX.r3.1HG0010470	HORVU.MOREX.r3.7HG0664260	HORVU.MOREX.r3.6HG0544120	HORVU.MOREX.r3.4HG0408080	HORVU.MOREX.r3.3HG0297830	HORVU.MOREX.r3.2HG0175520	HORVU.MOREX.r3.2HG0153140
HORVU.MOREX.r3.1HG0010480	HORVU.MOREX.r3.7HG0664270	HORVU.MOREX.r3.6HG0544130	HORVU.MOREX.r3.4HG0408090	HORVU.MOREX.r3.3HG0297840	HORVU.MOREX.r3.2HG0175530	HORVU.MOREX.r3.2HG0153170
HORVU.MOREX.r3.1HG0010490	HORVU.MOREX.r3.7HG0664280	HORVU.MOREX.r3.6HG0544140	HORVU.MOREX.r3.4HG0408100	HORVU.MOREX.r3.3HG0297850	HORVU.MOREX.r3.2HG0175540	HORVU.MOREX.r3.2HG0153230
HORVU.MOREX.r3.1HG0010520	HORVU.MOREX.r3.7HG0664290	HORVU.MOREX.r3.6HG0544170	HORVU.MOREX.r3.4HG0408140	HORVU.MOREX.r3.3HG0297860	HORVU.MOREX.r3.2HG0175550	HORVU.MOREX.r3.2HG0153250
HORVU.MOREX.r3.1HG0010530	HORVU.MOREX.r3.7HG0664300	HORVU.MOREX.r3.6HG0544190	HORVU.MOREX.r3.4HG0408170	HORVU.MOREX.r3.3HG0297870	HORVU.MOREX.r3.2HG0175560	HORVU.MOREX.r3.2HG0153260
HORVU.MOREX.r3.1HG0010600	HORVU.MOREX.r3.7HG0664320	HORVU.MOREX.r3.6HG0544290	HORVU.MOREX.r3.4HG0408180	HORVU.MOREX.r3.3HG0297880	HORVU.MOREX.r3.2HG0175570	HORVU.MOREX.r3.2HG0153360
HORVU.MOREX.r3.1HG0010610	HORVU.MOREX.r3.7HG0664330	HORVU.MOREX.r3.6HG0544330	HORVU.MOREX.r3.4HG0408210	HORVU.MOREX.r3.3HG0297900	HORVU.MOREX.r3.2HG0175580	HORVU.MOREX.r3.2HG0153370
HORVU.MOREX.r3.1HG0010620	HORVU.MOREX.r3.7HG0664370	HORVU.MOREX.r3.6HG0544340	HORVU.MOREX.r3.4HG0408230	HORVU.MOREX.r3.3HG0297910	HORVU.MOREX.r3.2HG0175590	HORVU.MOREX.r3.2HG0153380
HORVU.MOREX.r3.1HG0010640	HORVU.MOREX.r3.7HG0664380	HORVU.MOREX.r3.6HG0544350	HORVU.MOREX.r3.4HG0408240	HORVU.MOREX.r3.3HG0297940	HORVU.MOREX.r3.2HG0175630	HORVU.MOREX.r3.2HG0153420
HORVU.MOREX.r3.1HG0010650	HORVU.MOREX.r3.7HG0664390	HORVU.MOREX.r3.6HG0544370	HORVU.MOREX.r3.4HG0408250	HORVU.MOREX.r3.3HG0297960	HORVU.MOREX.r3.2HG0175640	HORVU.MOREX.r3.2HG0153460
HORVU.MOREX.r3.1HG0010660	HORVU.MOREX.r3.7HG0664410	HORVU.MOREX.r3.6HG0544390	HORVU.MOREX.r3.4HG0408260	HORVU.MOREX.r3.3HG0297990	HORVU.MOREX.r3.2HG0175670	HORVU.MOREX.r3.2HG0153470
HORVU.MOREX.r3.1HG0010690	HORVU.MOREX.r3.7HG0664460	HORVU.MOREX.r3.6HG0544400	HORVU.MOREX.r3.4HG0408270	HORVU.MOREX.r3.3HG0298010	HORVU.MOREX.r3.2HG0175690	HORVU.MOREX.r3.2HG0153480
HORVU.MOREX.r3.1HG0010700	HORVU.MOREX.r3.7HG0664470	HORVU.MOREX.r3.6HG0544420	HORVU.MOREX.r3.4HG0408280	HORVU.MOREX.r3.3HG0298020	HORVU.MOREX.r3.2HG0175700	HORVU.MOREX.r3.2HG0153490
HORVU.MOREX.r3.1HG0010720	HORVU.MOREX.r3.7HG0664490	HORVU.MOREX.r3.6HG0544470	HORVU.MOREX.r3.4HG0408300	HORVU.MOREX.r3.3HG0298030	HORVU.MOREX.r3.2HG0175710	HORVU.MOREX.r3.2HG0153610
HORVU.MOREX.r3.1HG0010730	HORVU.MOREX.r3.7HG0664600	HORVU.MOREX.r3.6HG0544530	HORVU.MOREX.r3.4HG0408310	HORVU.MOREX.r3.3HG0298060	HORVU.MOREX.r3.2HG0175730	HORVU.MOREX.r3.2HG0153630
HORVU.MOREX.r3.1HG0010750	HORVU.MOREX.r3.7HG0664610	HORVU.MOREX.r3.6HG0544550	HORVU.MOREX.r3.4HG0408330	HORVU.MOREX.r3.3HG0298070	HORVU.MOREX.r3.2HG0175760	HORVU.MOREX.r3.2HG0153670
HORVU.MOREX.r3.1HG0010780	HORVU.MOREX.r3.7HG0664620	HORVU.MOREX.r3.6HG0544570	HORVU.MOREX.r3.4HG0408340	HORVU.MOREX.r3.3HG0298080	HORVU.MOREX.r3.2HG0175770	HORVU.MOREX.r3.2HG0153680
HORVU.MOREX.r3.1HG0010790	HORVU.MOREX.r3.7HG0664630	HORVU.MOREX.r3.6HG0544730	HORVU.MOREX.r3.4HG0408380	HORVU.MOREX.r3.3HG0298090	HORVU.MOREX.r3.2HG0175780	HORVU.MOREX.r3.2HG0153720
HORVU.MOREX.r3.1HG0010800	HORVU.MOREX.r3.7HG0664660	HORVU.MOREX.r3.6HG0544880	HORVU.MOREX.r3.4HG0408390	HORVU.MOREX.r3.3HG0298100	HORVU.MOREX.r3.2HG0175790	HORVU.MOREX.r3.2HG0153740
HORVU.MOREX.r3.1HG0010810	HORVU.MOREX.r3.7HG0664700	HORVU.MOREX.r3.6HG0544890	HORVU.MOREX.r3.4HG0408400	HORVU.MOREX.r3.3HG0298110	HORVU.MOREX.r3.2HG0175820	HORVU.MOREX.r3.2HG0153750
HORVU.MOREX.r3.1HG0010840	HORVU.MOREX.r3.7HG0664710	HORVU.MOREX.r3.6HG0544930	HORVU.MOREX.r3.4HG0408420	HORVU.MOREX.r3.3HG0298120	HORVU.MOREX.r3.2HG0175850	HORVU.MOREX.r3.2HG0153790
HORVU.MOREX.r3.1HG0010890	HORVU.MOREX.r3.7HG0664720	HORVU.MOREX.r3.6HG0545040	HORVU.MOREX.r3.4HG0408430	HORVU.MOREX.r3.3HG0298130	HORVU.MOREX.r3.2HG0175910	HORVU.MOREX.r3.2HG0153800
HORVU.MOREX.r3.1HG0010920	HORVU.MOREX.r3.7HG0664740	HORVU.MOREX.r3.6HG0545080	HORVU.MOREX.r3.4HG0408470	HORVU.MOREX.r3.3HG0298150	HORVU.MOREX.r3.2HG0175930	HORVU.MOREX.r3.2HG0153830
HORVU.MOREX.r3.1HG0010930	HORVU.MOREX.r3.7HG0664770	HORVU.MOREX.r3.6HG0545090	HORVU.MOREX.r3.4HG0408490	HORVU.MOREX.r3.3HG0298160	HORVU.MOREX.r3.2HG0175970	HORVU.MOREX.r3.2HG0153850
HORVU.MOREX.r3.1HG0010950	HORVU.MOREX.r3.7HG0664780	HORVU.MOREX.r3.6HG0545100	HORVU.MOREX.r3.4HG0408500	HORVU.MOREX.r3.3HG0298170	HORVU.MOREX.r3.2HG0175990	HORVU.MOREX.r3.2HG0153860
HORVU.MOREX.r3.1HG0010970	HORVU.MOREX.r3.7HG0664800	HORVU.MOREX.r3.6HG0545110	HORVU.MOREX.r3.4HG0408510	HORVU.MOREX.r3.3HG0298180	HORVU.MOREX.r3.2HG0176000	HORVU.MOREX.r3.2HG0153900
HORVU.MOREX.r3.1HG0010980	HORVU.MOREX.r3.7HG0664810	HORVU.MOREX.r3.6HG0545130	HORVU.MOREX.r3.4HG0408520	HORVU.MOREX.r3.3HG0298190	HORVU.MOREX.r3.2HG0176010	HORVU.MOREX.r3.2HG0153990
HORVU.MOREX.r3.1HG0010990	HORVU.MOREX.r3.7HG0664820	HORVU.MOREX.r3.6HG0545140	HORVU.MOREX.r3.4HG0408530	HORVU.MOREX.r3.3HG0298200	HORVU.MOREX.r3.2HG0176020	HORVU.MOREX.r3.2HG0154000
HORVU.MOREX.r3.1HG0011010	HORVU.MOREX.r3.7HG0664830	HORVU.MOREX.r3.6HG0545150	HORVU.MOREX.r3.4HG0408540	HORVU.MOREX.r3.3HG0298210	HORVU.MOREX.r3.2HG0176030	HORVU.MOREX.r3.2HG0154040
HORVU.MOREX.r3.1HG0011020	HORVU.MOREX.r3.7HG0664840	HORVU.MOREX.r3.6HG0545180	HORVU.MOREX.r3.4HG0408550	HORVU.MOREX.r3.3HG0298240	HORVU.MOREX.r3.2HG0176040	HORVU.MOREX.r3.2HG0154100
HORVU.MOREX.r3.1HG0011080	HORVU.MOREX.r3.7HG0664850	HORVU.MOREX.r3.6HG0545210	HORVU.MOREX.r3.4HG0408560	HORVU.MOREX.r3.3HG0298250	HORVU.MOREX.r3.2HG0176050	HORVU.MOREX.r3.2HG0154110
HORVU.MOREX.r3.1HG0011090	HORVU.MOREX.r3.7HG0664860	HORVU.MOREX.r3.6HG0545220	HORVU.MOREX.r3.4HG0408570	HORVU.MOREX.r3.3HG0298260	HORVU.MOREX.r3.2HG0176070	HORVU.MOREX.r3.2HG0154120
HORVU.MOREX.r3.1HG0011100	HORVU.MOREX.r3.7HG0664870	HORVU.MOREX.r3.6HG0545240	HORVU.MOREX.r3.4HG0408590	HORVU.MOREX.r3.3HG0298280	HORVU.MOREX.r3.2HG0176090	HORVU.MOREX.r3.2HG0154130
HORVU.MOREX.r3.1HG0011110	HORVU.MOREX.r3.7HG0664880	HORVU.MOREX.r3.6HG0545260	HORVU.MOREX.r3.4HG0408600	HORVU.MOREX.r3.3HG0298310	HORVU.MOREX.r3.2HG0176100	HORVU.MOREX.r3.2HG0154160
HORVU.MOREX.r3.1HG0011130	HORVU.MOREX.r3.7HG0664900	HORVU.MOREX.r3.6HG0545280	HORVU.MOREX.r3.4HG0408610	HORVU.MOREX.r3.3HG0298320	HORVU.MOREX.r3.2HG0176180	HORVU.MOREX.r3.2HG0154170
HORVU.MOREX.r3.1HG0011140	HORVU.MOREX.r3.7HG0664920	HORVU.MOREX.r3.6HG0545290	HORVU.MOREX.r3.4HG0408620	HORVU.MOREX.r3.3HG0298330	HORVU.MOREX.r3.2HG0176200	HORVU.MOREX.r3.2HG0154200
HORVU.MOREX.r3.1HG0011170	HORVU.MOREX.r3.7HG0664940	HORVU.MOREX.r3.6HG0545320	HORVU.MOREX.r3.4HG0408630	HORVU.MOREX.r3.3HG0298340	HORVU.MOREX.r3.2HG0176220	HORVU.MOREX.r3.2HG0154210
HORVU.MOREX.r3.1HG0011180	HORVU.MOREX.r3.7HG0664950	HORVU.MOREX.r3.6HG0545330	HORVU.MOREX.r3.4HG0408640	HORVU.MOREX.r3.3HG0298350	HORVU.MOREX.r3.2HG0176240	HORVU.MOREX.r3.2HG0154230
HORVU.MOREX.r3.1HG0011190	HORVU.MOREX.r3.7HG0665020	HORVU.MOREX.r3.6HG0545360	HORVU.MOREX.r3.4HG0408650	HORVU.MOREX.r3.3HG0298370	HORVU.MOREX.r3.2HG0176250	HORVU.MOREX.r3.2HG0154250
HORVU.MOREX.r3.1HG0011220	HORVU.MOREX.r3.7HG0665040	HORVU.MOREX.r3.6HG0545380	HORVU.MOREX.r3.4HG0408670	HORVU.MOREX.r3.3HG0298380	HORVU.MOREX.r3.2HG0176270	HORVU.MOREX.r3.2HG0154270
HORVU.MOREX.r3.1HG0011250	HORVU.MOREX.r3.7HG0665050	HORVU.MOREX.r3.6HG0545390	HORVU.MOREX.r3.4HG0408690	HORVU.MOREX.r3.3HG0298390	HORVU.MOREX.r3.2HG0176280	HORVU.MOREX.r3.2HG0154320
HORVU.MOREX.r3.1HG0011260	HORVU.MOREX.r3.7HG0665090	HORVU.MOREX.r3.6HG0545410	HORVU.MOREX.r3.4HG0408710	HORVU.MOREX.r3.3HG0298420	HORVU.MOREX.r3.2HG0176290	HORVU.MOREX.r3.2HG0154330
HORVU.MOREX.r3.1HG0011270	HORVU.MOREX.r3.7HG0665140	HORVU.MOREX.r3.6HG0545450	HORVU.MOREX.r3.4HG0408730	HORVU.MOREX.r3.3HG0298450	HORVU.MOREX.r3.2HG0176300	HORVU.MOREX.r3.2HG0154340
HORVU.MOREX.r3.1HG0011280	HORVU.MOREX.r3.7HG0665160	HORVU.MOREX.r3.6HG0545460	HORVU.MOREX.r3.4HG0408760	HORVU.MOREX.r3.3HG0298470	HORVU.MOREX.r3.2HG0176310	HORVU.MOREX.r3.2HG0154350
HORVU.MOREX.r3.1HG0011360	HORVU.MOREX.r3.7HG0665180	HORVU.MOREX.r3.6HG0545470	HORVU.MOREX.r3.4HG0408780	HORVU.MOREX.r3.3HG0298480	HORVU.MOREX.r3.2HG0176340	HORVU.MOREX.r3.2HG0154370
HORVU.MOREX.r3.1HG0011370	HORVU.MOREX.r3.7HG0665190	HORVU.MOREX.r3.6HG0545480	HORVU.MOREX.r3.4HG0408790	HORVU.MOREX.r3.3HG0298500	HORVU.MOREX.r3.2HG0176390	HORVU.MOREX.r3.2HG0154460
HORVU.MOREX.r3.1HG0011380	HORVU.MOREX.r3.7HG0665200	HORVU.MOREX.r3.6HG0545500	HORVU.MOREX.r3.4HG0408800	HORVU.MOREX.r3.3HG0298510	HORVU.MOREX.r3.2HG0176400	HORVU.MOREX.r3.2HG0154480
HORVU.MOREX.r3.1HG0011400	HORVU.MOREX.r3.7HG0665250	HORVU.MOREX.r3.6HG0545510	HORVU.MOREX.r3.4HG0408810	HORVU.MOREX.r3.3HG0298520	HORVU.MOREX.r3.2HG0176420	HORVU.MOREX.r3.2HG0154500
HORVU.MOREX.r3.1HG0011440	HORVU.MOREX.r3.7HG0665260	HORVU.MOREX.r3.6HG0545520	HORVU.MOREX.r3.4HG0408840	HORVU.MOREX.r3.3HG0298540	HORVU.MOREX.r3.2HG0176440	HORVU.MOREX.r3.2HG0154520
HORVU.MOREX.r3.1HG0011450	HORVU.MOREX.r3.7HG0665270	HORVU.MOREX.r3.6HG0545530	HORVU.MOREX.r3.4HG0408860	HORVU.MOREX.r3.3HG0298570	HORVU.MOREX.r3.2HG0176480	HORVU.MOREX.r3.2HG0154530
HORVU.MOREX.r3.1HG0011510	HORVU.MOREX.r3.7HG0665280	HORVU.MOREX.r3.6HG0545540	HORVU.MOREX.r3.4HG0408870	HORVU.MOREX.r3.3HG0298600	HORVU.MOREX.r3.2HG0176490	HORVU.MOREX.r3.2HG0154550
HORVU.MOREX.r3.1HG0011540	HORVU.MOREX.r3.7HG0665290	HORVU.MOREX.r3.6HG0545550	HORVU.MOREX.r3.4HG0408880	HORVU.MOREX.r3.3HG0298620	HORVU.MOREX.r3.2HG0176500	HORVU.MOREX.r3.2HG0154580
HORVU.MOREX.r3.1HG0011550	HORVU.MOREX.r3.7HG0665340	HORVU.MOREX.r3.6HG0545560	HORVU.MOREX.r3.4HG0408930	HORVU.MOREX.r3.3HG0298640	HORVU.MOREX.r3.2HG0176510	HORVU.MOREX.r3.2HG0154590
HORVU.MOREX.r3.1HG0011560	HORVU.MOREX.r3.7HG0665350	HORVU.MOREX.r3.6HG0545580	HORVU.MOREX.r3.4HG0408940	HORVU.MOREX.r3.3HG0298670	HORVU.MOREX.r3.2HG0176550	HORVU.MOREX.r3.2HG0154600
HORVU.MOREX.r3.1HG0011570	HORVU.MOREX.r3.7HG0665360	HORVU.MOREX.r3.6HG0545600	HORVU.MOREX.r3.4HG0408980	HORVU.MOREX.r3.3HG0298680	HORVU.MOREX.r3.2HG0176560	HORVU.MOREX.r3.2HG0154610
HORVU.MOREX.r3.1HG0011590	HORVU.MOREX.r3.7HG0665380	HORVU.MOREX.r3.6HG0545620	HORVU.MOREX.r3.4HG0408990	HORVU.MOREX.r3.3HG0298700	HORVU.MOREX.r3.2HG0176570	HORVU.MOREX.r3.2HG0154630
HORVU.MOREX.r3.1HG0011660	HORVU.MOREX.r3.7HG0665410	HORVU.MOREX.r3.6HG0545630	HORVU.MOREX.r3.4HG0409010	HORVU.MOREX.r3.3HG0298710	HORVU.MOREX.r3.2HG0176580	HORVU.MOREX.r3.2HG0154660
HORVU.MOREX.r3.1HG0011680	HORVU.MOREX.r3.7HG0665460	HORVU.MOREX.r3.6HG0545640	HORVU.MOREX.r3.4HG0409030	HORVU.MOREX.r3.3HG0298740	HORVU.MOREX.r3.2HG0176600	HORVU.MOREX.r3.2HG0154670
HORVU.MOREX.r3.1HG0011700	HORVU.MOREX.r3.7HG0665480	HORVU.MOREX.r3.6HG0545650	HORVU.MOREX.r3.4HG0409080	HORVU.MOREX.r3.3HG0298750	HORVU.MOREX.r3.2HG0176640	HORVU.MOREX.r3.2HG0154740
HORVU.MOREX.r3.1HG0011730	HORVU.MOREX.r3.7HG0665490	HORVU.MOREX.r3.6HG0545660	HORVU.MOREX.r3.4HG0409110	HORVU.MOREX.r3.3HG0298790	HORVU.MOREX.r3.2HG0176650	HORVU.MOREX.r3.2HG0154760
HORVU.MOREX.r3.1HG0011760	HORVU.MOREX.r3.7HG0665510	HORVU.MOREX.r3.6HG0545670	HORVU.MOREX.r3.4HG0409120	HORVU.MOREX.r3.3HG0298800	HORVU.MOREX.r3.2HG0176660	HORVU.MOREX.r3.2HG0154790
HORVU.MOREX.r3.1HG0011790	HORVU.MOREX.r3.7HG0665520	HORVU.MOREX.r3.6HG0545690	HORVU.MOREX.r3.4HG0409140	HORVU.MOREX.r3.3HG0298810	HORVU.MOREX.r3.2HG0176670	HORVU.MOREX.r3.2HG0154830
HORVU.MOREX.r3.1HG0011820	HORVU.MOREX.r3.7HG0665530	HORVU.MOREX.r3.6HG0545700	HORVU.MOREX.r3.4HG0409150	HORVU.MOREX.r3.3HG0298840	HORVU.MOREX.r3.2HG0176680	HORVU.MOREX.r3.2HG0154840
HORVU.MOREX.r3.1HG0011870	HORVU.MOREX.r3.7HG0665540	HORVU.MOREX.r3.6HG0545770	HORVU.MOREX.r3.4HG0409170	HORVU.MOREX.r3.3HG0298850	HORVU.MOREX.r3.2HG0176700	HORVU.MOREX.r3.2HG0154850
HORVU.MOREX.r3.1HG0011880	HORVU.MOREX.r3.7HG0665560	HORVU.MOREX.r3.6HG0545780	HORVU.MOREX.r3.4HG0409180	HORVU.MOREX.r3.3HG0298860	HORVU.MOREX.r3.2HG0176710	HORVU.MOREX.r3.2HG0154890
HORVU.MOREX.r3.1HG0011890	HORVU.MOREX.r3.7HG0665570	HORVU.MOREX.r3.6HG0545790	HORVU.MOREX.r3.4HG0409190	HORVU.MOREX.r3.3HG0298880	HORVU.MOREX.r3.2HG0176730	HORVU.MOREX.r3.2HG0154970
HORVU.MOREX.r3.1HG0011900	HORVU.MOREX.r3.7HG0665590	HORVU.MOREX.r3.6HG0545810	HORVU.MOREX.r3.4HG0409200	HORVU.MOREX.r3.3HG0298890	HORVU.MOREX.r3.2HG0176770	HORVU.MOREX.r3.2HG0155050
HORVU.MOREX.r3.1HG0011910	HORVU.MOREX.r3.7HG0665610	HORVU.MOREX.r3.6HG0545830	HORVU.MOREX.r3.4HG0409210	HORVU.MOREX.r3.3HG0298910	HORVU.MOREX.r3.2HG0176790	HORVU.MOREX.r3.2HG0155060
HORVU.MOREX.r3.1HG0011960	HORVU.MOREX.r3.7HG0665620	HORVU.MOREX.r3.6HG0545860	HORVU.MOREX.r3.4HG0409220	HORVU.MOREX.r3.3HG0298920	HORVU.MOREX.r3.2HG0176800	HORVU.MOREX.r3.2HG0155090
HORVU.MOREX.r3.1HG0011970	HORVU.MOREX.r3.7HG0665630	HORVU.MOREX.r3.6HG0545870	HORVU.MOREX.r3.4HG0409230	HORVU.MOREX.r3.3HG0298980	HORVU.MOREX.r3.2HG0176810	HORVU.MOREX.r3.2HG0155100
HORVU.MOREX.r3.1HG0012000	HORVU.MOREX.r3.7HG0665640	HORVU.MOREX.r3.6HG0545880	HORVU.MOREX.r3.4HG0409240	HORVU.MOREX.r3.3HG0299000	HORVU.MOREX.r3.2HG0176860	HORVU.MOREX.r3.2HG0155110
HORVU.MOREX.r3.1HG0012010	HORVU.MOREX.r3.7HG0665650	HORVU.MOREX.r3.6HG0545890	HORVU.MOREX.r3.4HG0409260	HORVU.MOREX.r3.3HG0299010	HORVU.MOREX.r3.2HG0176870	HORVU.MOREX.r3.2HG0155130
HORVU.MOREX.r3.1HG0012020	HORVU.MOREX.r3.7HG0665680	HORVU.MOREX.r3.6HG0545900	HORVU.MOREX.r3.4HG0409270	HORVU.MOREX.r3.3HG0299020	HORVU.MOREX.r3.2HG0176900	HORVU.MOREX.r3.2HG0155140
HORVU.MOREX.r3.1HG0012030	HORVU.MOREX.r3.7HG0665710	HORVU.MOREX.r3.6HG0545910	HORVU.MOREX.r3.4HG0409280	HORVU.MOREX.r3.3HG0299050	HORVU.MOREX.r3.2HG0176910	HORVU.MOREX.r3.2HG0155180
HORVU.MOREX.r3.1HG0012040	HORVU.MOREX.r3.7HG0665730	HORVU.MOREX.r3.6HG0545920	HORVU.MOREX.r3.4HG0409330	HORVU.MOREX.r3.3HG0299080	HORVU.MOREX.r3.2HG0176920	HORVU.MOREX.r3.2HG0155210
HORVU.MOREX.r3.1HG0012100	HORVU.MOREX.r3.7HG0665750	HORVU.MOREX.r3.6HG0545930	HORVU.MOREX.r3.4HG0409340	HORVU.MOREX.r3.3HG0299090	HORVU.MOREX.r3.2HG0176930	HORVU.MOREX.r3.2HG0155300
HORVU.MOREX.r3.1HG0012110	HORVU.MOREX.r3.7HG0665770	HORVU.MOREX.r3.6HG0545940	HORVU.MOREX.r3.4HG0409360	HORVU.MOREX.r3.3HG0299100	HORVU.MOREX.r3.2HG0176940	HORVU.MOREX.r3.2HG0155460
HORVU.MOREX.r3.1HG0012140	HORVU.MOREX.r3.7HG0665780	HORVU.MOREX.r3.6HG0545950	HORVU.MOREX.r3.4HG0409380	HORVU.MOREX.r3.3HG0299110	HORVU.MOREX.r3.2HG0176950	HORVU.MOREX.r3.2HG0155470
HORVU.MOREX.r3.1HG0012160	HORVU.MOREX.r3.7HG0665810	HORVU.MOREX.r3.6HG0545960	HORVU.MOREX.r3.4HG0409400	HORVU.MOREX.r3.3HG0299120	HORVU.MOREX.r3.2HG0176960	HORVU.MOREX.r3.2HG0155500
HORVU.MOREX.r3.1HG0012170	HORVU.MOREX.r3.7HG0665830	HORVU.MOREX.r3.6HG0545970	HORVU.MOREX.r3.4HG0409410	HORVU.MOREX.r3.3HG0299130	HORVU.MOREX.r3.2HG0176970	HORVU.MOREX.r3.2HG0155530
HORVU.MOREX.r3.1HG0012180	HORVU.MOREX.r3.7HG0665860	HORVU.MOREX.r3.6HG0545980	HORVU.MOREX.r3.4HG0409440	HORVU.MOREX.r3.3HG0299140	HORVU.MOREX.r3.2HG0176980	HORVU.MOREX.r3.2HG0155540
HORVU.MOREX.r3.1HG0012250	HORVU.MOREX.r3.7HG0665870	HORVU.MOREX.r3.6HG0545990	HORVU.MOREX.r3.4HG0409450	HORVU.MOREX.r3.3HG0299150	HORVU.MOREX.r3.2HG0176990	HORVU.MOREX.r3.2HG0155570
HORVU.MOREX.r3.1HG0012290	HORVU.MOREX.r3.7HG0665880	HORVU.MOREX.r3.6HG0546030	HORVU.MOREX.r3.4HG0409460	HORVU.MOREX.r3.3HG0299160	HORVU.MOREX.r3.2HG0177000	HORVU.MOREX.r3.2HG0155580
HORVU.MOREX.r3.1HG0012300	HORVU.MOREX.r3.7HG0665930	HORVU.MOREX.r3.6HG0546040	HORVU.MOREX.r3.4HG0409470	HORVU.MOREX.r3.3HG0299200	HORVU.MOREX.r3.2HG0177020	HORVU.MOREX.r3.2HG0155590
HORVU.MOREX.r3.1HG0012310	HORVU.MOREX.r3.7HG0665940	HORVU.MOREX.r3.6HG0546050	HORVU.MOREX.r3.4HG0409490	HORVU.MOREX.r3.3HG0299220	HORVU.MOREX.r3.2HG0177030	HORVU.MOREX.r3.2HG0155620
HORVU.MOREX.r3.1HG0012320	HORVU.MOREX.r3.7HG0665970	HORVU.MOREX.r3.6HG0546070	HORVU.MOREX.r3.4HG0409510	HORVU.MOREX.r3.3HG0299240	HORVU.MOREX.r3.2HG0177040	HORVU.MOREX.r3.2HG0155650
HORVU.MOREX.r3.1HG0012330	HORVU.MOREX.r3.7HG0665990	HORVU.MOREX.r3.6HG0546100	HORVU.MOREX.r3.4HG0409520	HORVU.MOREX.r3.3HG0299250	HORVU.MOREX.r3.2HG0177050	HORVU.MOREX.r3.2HG0155680
HORVU.MOREX.r3.1HG0012340	HORVU.MOREX.r3.7HG0666010	HORVU.MOREX.r3.6HG0546110	HORVU.MOREX.r3.4HG0409530	HORVU.MOREX.r3.3HG0299280	HORVU.MOREX.r3.2HG0177080	HORVU.MOREX.r3.2HG0155700
HORVU.MOREX.r3.1HG0012370	HORVU.MOREX.r3.7HG0666020	HORVU.MOREX.r3.6HG0546120	HORVU.MOREX.r3.4HG0409540	HORVU.MOREX.r3.3HG0299290	HORVU.MOREX.r3.2HG0177110	HORVU.MOREX.r3.2HG0155750
HORVU.MOREX.r3.1HG0012390	HORVU.MOREX.r3.7HG0666030	HORVU.MOREX.r3.6HG0546130	HORVU.MOREX.r3.4HG0409560	HORVU.MOREX.r3.3HG0299300	HORVU.MOREX.r3.2HG0177120	HORVU.MOREX.r3.2HG0155760
HORVU.MOREX.r3.1HG0012400	HORVU.MOREX.r3.7HG0666060	HORVU.MOREX.r3.6HG0546140	HORVU.MOREX.r3.4HG0409580	HORVU.MOREX.r3.3HG0299310	HORVU.MOREX.r3.2HG0177240	HORVU.MOREX.r3.2HG0155780
HORVU.MOREX.r3.1HG0012410	HORVU.MOREX.r3.7HG0666080	HORVU.MOREX.r3.6HG0546160	HORVU.MOREX.r3.4HG0409590	HORVU.MOREX.r3.3HG0299320	HORVU.MOREX.r3.2HG0177260	HORVU.MOREX.r3.2HG0155790
HORVU.MOREX.r3.1HG0012420	HORVU.MOREX.r3.7HG0666090	HORVU.MOREX.r3.6HG0546180	HORVU.MOREX.r3.4HG0409600	HORVU.MOREX.r3.3HG0299350	HORVU.MOREX.r3.2HG0177270	HORVU.MOREX.r3.2HG0155900
HORVU.MOREX.r3.1HG0012430	HORVU.MOREX.r3.7HG0666110	HORVU.MOREX.r3.6HG0546200	HORVU.MOREX.r3.4HG0409620	HORVU.MOREX.r3.3HG0299360	HORVU.MOREX.r3.2HG0177280	HORVU.MOREX.r3.2HG0155970
HORVU.MOREX.r3.1HG0012440	HORVU.MOREX.r3.7HG0666120	HORVU.MOREX.r3.6HG0546210	HORVU.MOREX.r3.4HG0409660	HORVU.MOREX.r3.3HG0299370	HORVU.MOREX.r3.2HG0177290	HORVU.MOREX.r3.2HG0156100
HORVU.MOREX.r3.1HG0012480	HORVU.MOREX.r3.7HG0666130	HORVU.MOREX.r3.6HG0546230	HORVU.MOREX.r3.4HG0409670	HORVU.MOREX.r3.3HG0299440	HORVU.MOREX.r3.2HG0177300	HORVU.MOREX.r3.2HG0156110
HORVU.MOREX.r3.1HG0012490	HORVU.MOREX.r3.7HG0666140	HORVU.MOREX.r3.6HG0546250	HORVU.MOREX.r3.4HG0409680	HORVU.MOREX.r3.3HG0299450	HORVU.MOREX.r3.2HG0177310	HORVU.MOREX.r3.2HG0156130
HORVU.MOREX.r3.1HG0012520	HORVU.MOREX.r3.7HG0666190	HORVU.MOREX.r3.6HG0546270	HORVU.MOREX.r3.4HG0409690	HORVU.MOREX.r3.3HG0299460	HORVU.MOREX.r3.2HG0177320	HORVU.MOREX.r3.2HG0156150
HORVU.MOREX.r3.1HG0012530	HORVU.MOREX.r3.7HG0666250	HORVU.MOREX.r3.6HG0546280	HORVU.MOREX.r3.4HG0409700	HORVU.MOREX.r3.3HG0299530	HORVU.MOREX.r3.2HG0177340	HORVU.MOREX.r3.2HG0156220
HORVU.MOREX.r3.1HG0012540	HORVU.MOREX.r3.7HG0666260	HORVU.MOREX.r3.6HG0546290	HORVU.MOREX.r3.4HG0409710	HORVU.MOREX.r3.3HG0299540	HORVU.MOREX.r3.2HG0177360	HORVU.MOREX.r3.2HG0156260
HORVU.MOREX.r3.1HG0012570	HORVU.MOREX.r3.7HG0666290	HORVU.MOREX.r3.6HG0546330	HORVU.MOREX.r3.4HG0409720	HORVU.MOREX.r3.3HG0299560	HORVU.MOREX.r3.2HG0177370	HORVU.MOREX.r3.2HG0156270
HORVU.MOREX.r3.1HG0012580	HORVU.MOREX.r3.7HG0666330	HORVU.MOREX.r3.6HG0546340	HORVU.MOREX.r3.4HG0409760	HORVU.MOREX.r3.3HG0299570	HORVU.MOREX.r3.2HG0177410	HORVU.MOREX.r3.2HG0156280
HORVU.MOREX.r3.1HG0012590	HORVU.MOREX.r3.7HG0666340	HORVU.MOREX.r3.6HG0546350	HORVU.MOREX.r3.4HG0409770	HORVU.MOREX.r3.3HG0299580	HORVU.MOREX.r3.2HG0177420	HORVU.MOREX.r3.2HG0156310
HORVU.MOREX.r3.1HG0012620	HORVU.MOREX.r3.7HG0666350	HORVU.MOREX.r3.6HG0546360	HORVU.MOREX.r3.4HG0409790	HORVU.MOREX.r3.3HG0299600	HORVU.MOREX.r3.2HG0177440	HORVU.MOREX.r3.2HG0156390
HORVU.MOREX.r3.1HG0012630	HORVU.MOREX.r3.7HG0666390	HORVU.MOREX.r3.6HG0546370	HORVU.MOREX.r3.4HG0409820	HORVU.MOREX.r3.3HG0299650	HORVU.MOREX.r3.2HG0177450	HORVU.MOREX.r3.2HG0156400
HORVU.MOREX.r3.1HG0012640	HORVU.MOREX.r3.7HG0666420	HORVU.MOREX.r3.6HG0546380	HORVU.MOREX.r3.4HG0409840	HORVU.MOREX.r3.3HG0299660	HORVU.MOREX.r3.2HG0177460	HORVU.MOREX.r3.2HG0156430
HORVU.MOREX.r3.1HG0012650	HORVU.MOREX.r3.7HG0666430	HORVU.MOREX.r3.6HG0546390	HORVU.MOREX.r3.4HG0409850	HORVU.MOREX.r3.3HG0299670	HORVU.MOREX.r3.2HG0177470	HORVU.MOREX.r3.2HG0156450
HORVU.MOREX.r3.1HG0012660	HORVU.MOREX.r3.7HG0666440	HORVU.MOREX.r3.6HG0546400	HORVU.MOREX.r3.4HG0409870	HORVU.MOREX.r3.3HG0299690	HORVU.MOREX.r3.2HG0177480	HORVU.MOREX.r3.2HG0156460
HORVU.MOREX.r3.1HG0012670	HORVU.MOREX.r3.7HG0666460	HORVU.MOREX.r3.6HG0546410	HORVU.MOREX.r3.4HG0409880	HORVU.MOREX.r3.3HG0299710	HORVU.MOREX.r3.2HG0177510	HORVU.MOREX.r3.2HG0156470
HORVU.MOREX.r3.1HG0012680	HORVU.MOREX.r3.7HG0666480	HORVU.MOREX.r3.6HG0546430	HORVU.MOREX.r3.4HG0409890	HORVU.MOREX.r3.3HG0299740	HORVU.MOREX.r3.2HG0177520	HORVU.MOREX.r3.2HG0156510
HORVU.MOREX.r3.1HG0012720	HORVU.MOREX.r3.7HG0666490	HORVU.MOREX.r3.6HG0546450	HORVU.MOREX.r3.4HG0409900	HORVU.MOREX.r3.3HG0299750	HORVU.MOREX.r3.2HG0177540	HORVU.MOREX.r3.2HG0156520
HORVU.MOREX.r3.1HG0012730	HORVU.MOREX.r3.7HG0666500	HORVU.MOREX.r3.6HG0546530	HORVU.MOREX.r3.4HG0409910	HORVU.MOREX.r3.3HG0299760	HORVU.MOREX.r3.2HG0177550	HORVU.MOREX.r3.2HG0156570
HORVU.MOREX.r3.1HG0012760	HORVU.MOREX.r3.7HG0666540	HORVU.MOREX.r3.6HG0546550	HORVU.MOREX.r3.4HG0409940	HORVU.MOREX.r3.3HG0299780	HORVU.MOREX.r3.2HG0177560	HORVU.MOREX.r3.2HG0156580
HORVU.MOREX.r3.1HG0012840	HORVU.MOREX.r3.7HG0666550	HORVU.MOREX.r3.6HG0546560	HORVU.MOREX.r3.4HG0409950	HORVU.MOREX.r3.3HG0299800	HORVU.MOREX.r3.2HG0177570	HORVU.MOREX.r3.2HG0156590
HORVU.MOREX.r3.1HG0012850	HORVU.MOREX.r3.7HG0666560	HORVU.MOREX.r3.6HG0546570	HORVU.MOREX.r3.4HG0409970	HORVU.MOREX.r3.3HG0299810	HORVU.MOREX.r3.2HG0177590	HORVU.MOREX.r3.2HG0156610
HORVU.MOREX.r3.1HG0012860	HORVU.MOREX.r3.7HG0666570	HORVU.MOREX.r3.6HG0546590	HORVU.MOREX.r3.4HG0410000	HORVU.MOREX.r3.3HG0299820	HORVU.MOREX.r3.2HG0177600	HORVU.MOREX.r3.2HG0156620
HORVU.MOREX.r3.1HG0012870	HORVU.MOREX.r3.7HG0666580	HORVU.MOREX.r3.6HG0546600	HORVU.MOREX.r3.4HG0410010	HORVU.MOREX.r3.3HG0299830	HORVU.MOREX.r3.2HG0177640	HORVU.MOREX.r3.2HG0156680
HORVU.MOREX.r3.1HG0012880	HORVU.MOREX.r3.7HG0666610	HORVU.MOREX.r3.6HG0546610	HORVU.MOREX.r3.4HG0410020	HORVU.MOREX.r3.3HG0299850	HORVU.MOREX.r3.2HG0177650	HORVU.MOREX.r3.2HG0156710
HORVU.MOREX.r3.1HG0012890	HORVU.MOREX.r3.7HG0666620	HORVU.MOREX.r3.6HG0546620	HORVU.MOREX.r3.4HG0410030	HORVU.MOREX.r3.3HG0299860	HORVU.MOREX.r3.2HG0177660	HORVU.MOREX.r3.2HG0156720
HORVU.MOREX.r3.1HG0012950	HORVU.MOREX.r3.7HG0666630	HORVU.MOREX.r3.6HG0546630	HORVU.MOREX.r3.4HG0410040	HORVU.MOREX.r3.3HG0299870	HORVU.MOREX.r3.2HG0177670	HORVU.MOREX.r3.2HG0156730
HORVU.MOREX.r3.1HG0012990	HORVU.MOREX.r3.7HG0666660	HORVU.MOREX.r3.6HG0546640	HORVU.MOREX.r3.4HG0410050	HORVU.MOREX.r3.3HG0299890	HORVU.MOREX.r3.2HG0177680	HORVU.MOREX.r3.2HG0156760
HORVU.MOREX.r3.1HG0013000	HORVU.MOREX.r3.7HG0666670	HORVU.MOREX.r3.6HG0546660	HORVU.MOREX.r3.4HG0410080	HORVU.MOREX.r3.3HG0299940	HORVU.MOREX.r3.2HG0177740	HORVU.MOREX.r3.2HG0156770
HORVU.MOREX.r3.1HG0013020	HORVU.MOREX.r3.7HG0666680	HORVU.MOREX.r3.6HG0546690	HORVU.MOREX.r3.4HG0410090	HORVU.MOREX.r3.3HG0299950	HORVU.MOREX.r3.2HG0177780	HORVU.MOREX.r3.2HG0156820
HORVU.MOREX.r3.1HG0013030	HORVU.MOREX.r3.7HG0666700	HORVU.MOREX.r3.6HG0546700	HORVU.MOREX.r3.4HG0410110	HORVU.MOREX.r3.3HG0299980	HORVU.MOREX.r3.2HG0177790	HORVU.MOREX.r3.2HG0156870
HORVU.MOREX.r3.1HG0013050	HORVU.MOREX.r3.7HG0666710	HORVU.MOREX.r3.6HG0546710	HORVU.MOREX.r3.4HG0410120	HORVU.MOREX.r3.3HG0299990	HORVU.MOREX.r3.2HG0177810	HORVU.MOREX.r3.2HG0156880
HORVU.MOREX.r3.1HG0013070	HORVU.MOREX.r3.7HG0666740	HORVU.MOREX.r3.6HG0546730	HORVU.MOREX.r3.4HG0410140	HORVU.MOREX.r3.3HG0300020	HORVU.MOREX.r3.2HG0177820	HORVU.MOREX.r3.2HG0156890
HORVU.MOREX.r3.1HG0013140	HORVU.MOREX.r3.7HG0666750	HORVU.MOREX.r3.6HG0546750	HORVU.MOREX.r3.4HG0410160	HORVU.MOREX.r3.3HG0300030	HORVU.MOREX.r3.2HG0177830	HORVU.MOREX.r3.2HG0156930
HORVU.MOREX.r3.1HG0013150	HORVU.MOREX.r3.7HG0666760	HORVU.MOREX.r3.6HG0546770	HORVU.MOREX.r3.4HG0410170	HORVU.MOREX.r3.3HG0300050	HORVU.MOREX.r3.2HG0177860	HORVU.MOREX.r3.2HG0156970
HORVU.MOREX.r3.1HG0013170	HORVU.MOREX.r3.7HG0666770	HORVU.MOREX.r3.6HG0546790	HORVU.MOREX.r3.4HG0410180	HORVU.MOREX.r3.3HG0300080	HORVU.MOREX.r3.2HG0177920	HORVU.MOREX.r3.2HG0157020
HORVU.MOREX.r3.1HG0013180	HORVU.MOREX.r3.7HG0666800	HORVU.MOREX.r3.6HG0546810	HORVU.MOREX.r3.4HG0410190	HORVU.MOREX.r3.3HG0300100	HORVU.MOREX.r3.2HG0177930	HORVU.MOREX.r3.2HG0157030
HORVU.MOREX.r3.1HG0013220	HORVU.MOREX.r3.7HG0666810	HORVU.MOREX.r3.6HG0546820	HORVU.MOREX.r3.4HG0410200	HORVU.MOREX.r3.3HG0300110	HORVU.MOREX.r3.2HG0177940	HORVU.MOREX.r3.2HG0157090
HORVU.MOREX.r3.1HG0013230	HORVU.MOREX.r3.7HG0666820	HORVU.MOREX.r3.6HG0546840	HORVU.MOREX.r3.4HG0410210	HORVU.MOREX.r3.3HG0300120	HORVU.MOREX.r3.2HG0177960	HORVU.MOREX.r3.2HG0157110
HORVU.MOREX.r3.1HG0013240	HORVU.MOREX.r3.7HG0666830	HORVU.MOREX.r3.6HG0546870	HORVU.MOREX.r3.4HG0410270	HORVU.MOREX.r3.3HG0300130	HORVU.MOREX.r3.2HG0177980	HORVU.MOREX.r3.2HG0157140
HORVU.MOREX.r3.1HG0013250	HORVU.MOREX.r3.7HG0666840	HORVU.MOREX.r3.6HG0546900	HORVU.MOREX.r3.4HG0410290	HORVU.MOREX.r3.3HG0300150	HORVU.MOREX.r3.2HG0177990	HORVU.MOREX.r3.2HG0157150
HORVU.MOREX.r3.1HG0013270	HORVU.MOREX.r3.7HG0666850	HORVU.MOREX.r3.6HG0546910	HORVU.MOREX.r3.4HG0410300	HORVU.MOREX.r3.3HG0300160	HORVU.MOREX.r3.2HG0178000	HORVU.MOREX.r3.2HG0157160
HORVU.MOREX.r3.1HG0013280	HORVU.MOREX.r3.7HG0666870	HORVU.MOREX.r3.6HG0546920	HORVU.MOREX.r3.4HG0410340	HORVU.MOREX.r3.3HG0300190	HORVU.MOREX.r3.2HG0178010	HORVU.MOREX.r3.2HG0157170
HORVU.MOREX.r3.1HG0013300	HORVU.MOREX.r3.7HG0666880	HORVU.MOREX.r3.6HG0546930	HORVU.MOREX.r3.4HG0410360	HORVU.MOREX.r3.3HG0300210	HORVU.MOREX.r3.2HG0178020	HORVU.MOREX.r3.2HG0157180
HORVU.MOREX.r3.1HG0013310	HORVU.MOREX.r3.7HG0666960	HORVU.MOREX.r3.6HG0546950	HORVU.MOREX.r3.4HG0410390	HORVU.MOREX.r3.3HG0300270	HORVU.MOREX.r3.2HG0178030	HORVU.MOREX.r3.2HG0157190
HORVU.MOREX.r3.1HG0013330	HORVU.MOREX.r3.7HG0667000	HORVU.MOREX.r3.6HG0546960	HORVU.MOREX.r3.4HG0410400	HORVU.MOREX.r3.3HG0300280	HORVU.MOREX.r3.2HG0178040	HORVU.MOREX.r3.2HG0157200
HORVU.MOREX.r3.1HG0013340	HORVU.MOREX.r3.7HG0667070	HORVU.MOREX.r3.6HG0547010	HORVU.MOREX.r3.4HG0410410	HORVU.MOREX.r3.3HG0300310	HORVU.MOREX.r3.2HG0178050	HORVU.MOREX.r3.2HG0157210
HORVU.MOREX.r3.1HG0013350	HORVU.MOREX.r3.7HG0667080	HORVU.MOREX.r3.6HG0547020	HORVU.MOREX.r3.4HG0410440	HORVU.MOREX.r3.3HG0300320	HORVU.MOREX.r3.2HG0178060	HORVU.MOREX.r3.2HG0157250
HORVU.MOREX.r3.1HG0013380	HORVU.MOREX.r3.7HG0667120	HORVU.MOREX.r3.6HG0547040	HORVU.MOREX.r3.4HG0410450	HORVU.MOREX.r3.3HG0300330	HORVU.MOREX.r3.2HG0178070	HORVU.MOREX.r3.2HG0157260
HORVU.MOREX.r3.1HG0013400	HORVU.MOREX.r3.7HG0667130	HORVU.MOREX.r3.6HG0547050	HORVU.MOREX.r3.4HG0410500	HORVU.MOREX.r3.3HG0300340	HORVU.MOREX.r3.2HG0178080	HORVU.MOREX.r3.2HG0157290
HORVU.MOREX.r3.1HG0013440	HORVU.MOREX.r3.7HG0667140	HORVU.MOREX.r3.6HG0547060	HORVU.MOREX.r3.4HG0410510	HORVU.MOREX.r3.3HG0300350	HORVU.MOREX.r3.2HG0178090	HORVU.MOREX.r3.2HG0157300
HORVU.MOREX.r3.1HG0013450	HORVU.MOREX.r3.7HG0667150	HORVU.MOREX.r3.6HG0547070	HORVU.MOREX.r3.4HG0410540	HORVU.MOREX.r3.3HG0300360	HORVU.MOREX.r3.2HG0178100	HORVU.MOREX.r3.2HG0157310
HORVU.MOREX.r3.1HG0013470	HORVU.MOREX.r3.7HG0667160	HORVU.MOREX.r3.6HG0547080	HORVU.MOREX.r3.4HG0410550	HORVU.MOREX.r3.3HG0300370	HORVU.MOREX.r3.2HG0178110	HORVU.MOREX.r3.2HG0157320
HORVU.MOREX.r3.1HG0013480	HORVU.MOREX.r3.7HG0667180	HORVU.MOREX.r3.6HG0547090	HORVU.MOREX.r3.4HG0410560	HORVU.MOREX.r3.3HG0300380	HORVU.MOREX.r3.2HG0178120	HORVU.MOREX.r3.2HG0157330
HORVU.MOREX.r3.1HG0013490	HORVU.MOREX.r3.7HG0667190	HORVU.MOREX.r3.6HG0547100	HORVU.MOREX.r3.4HG0410610	HORVU.MOREX.r3.3HG0300400	HORVU.MOREX.r3.2HG0178130	HORVU.MOREX.r3.2HG0157340
HORVU.MOREX.r3.1HG0013510	HORVU.MOREX.r3.7HG0667210	HORVU.MOREX.r3.6HG0547110	HORVU.MOREX.r3.4HG0410620	HORVU.MOREX.r3.3HG0300410	HORVU.MOREX.r3.2HG0178140	HORVU.MOREX.r3.2HG0157400
HORVU.MOREX.r3.1HG0013540	HORVU.MOREX.r3.7HG0667240	HORVU.MOREX.r3.6HG0547120	HORVU.MOREX.r3.4HG0410630	HORVU.MOREX.r3.3HG0300440	HORVU.MOREX.r3.2HG0178150	HORVU.MOREX.r3.2HG0157410
HORVU.MOREX.r3.1HG0013570	HORVU.MOREX.r3.7HG0667250	HORVU.MOREX.r3.6HG0547130	HORVU.MOREX.r3.4HG0410640	HORVU.MOREX.r3.3HG0300480	HORVU.MOREX.r3.2HG0178160	HORVU.MOREX.r3.2HG0157420
HORVU.MOREX.r3.1HG0013590	HORVU.MOREX.r3.7HG0667260	HORVU.MOREX.r3.6HG0547150	HORVU.MOREX.r3.4HG0410650	HORVU.MOREX.r3.3HG0300490	HORVU.MOREX.r3.2HG0178170	HORVU.MOREX.r3.2HG0157450
HORVU.MOREX.r3.1HG0013650	HORVU.MOREX.r3.7HG0667280	HORVU.MOREX.r3.6HG0547160	HORVU.MOREX.r3.4HG0410660	HORVU.MOREX.r3.3HG0300510	HORVU.MOREX.r3.2HG0178180	HORVU.MOREX.r3.2HG0157470
HORVU.MOREX.r3.1HG0013690	HORVU.MOREX.r3.7HG0667290	HORVU.MOREX.r3.6HG0547200	HORVU.MOREX.r3.4HG0410670	HORVU.MOREX.r3.3HG0300520	HORVU.MOREX.r3.2HG0178210	HORVU.MOREX.r3.2HG0157490
HORVU.MOREX.r3.1HG0013700	HORVU.MOREX.r3.7HG0667330	HORVU.MOREX.r3.6HG0547220	HORVU.MOREX.r3.4HG0410680	HORVU.MOREX.r3.3HG0300540	HORVU.MOREX.r3.2HG0178240	HORVU.MOREX.r3.2HG0157500
HORVU.MOREX.r3.1HG0013800	HORVU.MOREX.r3.7HG0667340	HORVU.MOREX.r3.6HG0547240	HORVU.MOREX.r3.4HG0410690	HORVU.MOREX.r3.3HG0300560	HORVU.MOREX.r3.2HG0178250	HORVU.MOREX.r3.2HG0157530
HORVU.MOREX.r3.1HG0013820	HORVU.MOREX.r3.7HG0667350	HORVU.MOREX.r3.6HG0547280	HORVU.MOREX.r3.4HG0410700	HORVU.MOREX.r3.3HG0300570	HORVU.MOREX.r3.2HG0178290	HORVU.MOREX.r3.2HG0157550
HORVU.MOREX.r3.1HG0013910	HORVU.MOREX.r3.7HG0667360	HORVU.MOREX.r3.6HG0547320	HORVU.MOREX.r3.4HG0410710	HORVU.MOREX.r3.3HG0300580	HORVU.MOREX.r3.2HG0178350	HORVU.MOREX.r3.2HG0157570
HORVU.MOREX.r3.1HG0013920	HORVU.MOREX.r3.7HG0667370	HORVU.MOREX.r3.6HG0547330	HORVU.MOREX.r3.4HG0410720	HORVU.MOREX.r3.3HG0300590	HORVU.MOREX.r3.2HG0178400	HORVU.MOREX.r3.2HG0157580
HORVU.MOREX.r3.1HG0013940	HORVU.MOREX.r3.7HG0667390	HORVU.MOREX.r3.6HG0547350	HORVU.MOREX.r3.4HG0410730	HORVU.MOREX.r3.3HG0300600	HORVU.MOREX.r3.2HG0178420	HORVU.MOREX.r3.2HG0157610
HORVU.MOREX.r3.1HG0013960	HORVU.MOREX.r3.7HG0667400	HORVU.MOREX.r3.6HG0547360	HORVU.MOREX.r3.4HG0410740	HORVU.MOREX.r3.3HG0300610	HORVU.MOREX.r3.2HG0178430	HORVU.MOREX.r3.2HG0157620
HORVU.MOREX.r3.1HG0013970	HORVU.MOREX.r3.7HG0667410	HORVU.MOREX.r3.6HG0547370	HORVU.MOREX.r3.4HG0410750	HORVU.MOREX.r3.3HG0300620	HORVU.MOREX.r3.2HG0178440	HORVU.MOREX.r3.2HG0157630
HORVU.MOREX.r3.1HG0013980	HORVU.MOREX.r3.7HG0667440	HORVU.MOREX.r3.6HG0547380	HORVU.MOREX.r3.4HG0410760	HORVU.MOREX.r3.3HG0300630	HORVU.MOREX.r3.2HG0178450	HORVU.MOREX.r3.2HG0157640
HORVU.MOREX.r3.1HG0014090	HORVU.MOREX.r3.7HG0667450	HORVU.MOREX.r3.6HG0547390	HORVU.MOREX.r3.4HG0410780	HORVU.MOREX.r3.3HG0300640	HORVU.MOREX.r3.2HG0178460	HORVU.MOREX.r3.2HG0157650
HORVU.MOREX.r3.1HG0014100	HORVU.MOREX.r3.7HG0667460	HORVU.MOREX.r3.6HG0547410	HORVU.MOREX.r3.4HG0410790	HORVU.MOREX.r3.3HG0300650	HORVU.MOREX.r3.2HG0178470	HORVU.MOREX.r3.2HG0157680
HORVU.MOREX.r3.1HG0014120	HORVU.MOREX.r3.7HG0667470	HORVU.MOREX.r3.6HG0547420	HORVU.MOREX.r3.4HG0410800	HORVU.MOREX.r3.3HG0300660	HORVU.MOREX.r3.2HG0178480	HORVU.MOREX.r3.2HG0157690
HORVU.MOREX.r3.1HG0014190	HORVU.MOREX.r3.7HG0667480	HORVU.MOREX.r3.6HG0547430	HORVU.MOREX.r3.4HG0410810	HORVU.MOREX.r3.3HG0300680	HORVU.MOREX.r3.2HG0178500	HORVU.MOREX.r3.2HG0157710
HORVU.MOREX.r3.1HG0014220	HORVU.MOREX.r3.7HG0667500	HORVU.MOREX.r3.6HG0547440	HORVU.MOREX.r3.4HG0410820	HORVU.MOREX.r3.3HG0300690	HORVU.MOREX.r3.2HG0178520	HORVU.MOREX.r3.2HG0157780
HORVU.MOREX.r3.1HG0014240	HORVU.MOREX.r3.7HG0667510	HORVU.MOREX.r3.6HG0547460	HORVU.MOREX.r3.4HG0410830	HORVU.MOREX.r3.3HG0300700	HORVU.MOREX.r3.2HG0178540	HORVU.MOREX.r3.2HG0157790
HORVU.MOREX.r3.1HG0014260	HORVU.MOREX.r3.7HG0667520	HORVU.MOREX.r3.6HG0547470	HORVU.MOREX.r3.4HG0410870	HORVU.MOREX.r3.3HG0300710	HORVU.MOREX.r3.2HG0178550	HORVU.MOREX.r3.2HG0157820
HORVU.MOREX.r3.1HG0014320	HORVU.MOREX.r3.7HG0667530	HORVU.MOREX.r3.6HG0547480	HORVU.MOREX.r3.4HG0410880	HORVU.MOREX.r3.3HG0300720	HORVU.MOREX.r3.2HG0178560	HORVU.MOREX.r3.2HG0157890
HORVU.MOREX.r3.1HG0014340	HORVU.MOREX.r3.7HG0667540	HORVU.MOREX.r3.6HG0547490	HORVU.MOREX.r3.4HG0410900	HORVU.MOREX.r3.3HG0300760	HORVU.MOREX.r3.2HG0178580	HORVU.MOREX.r3.2HG0157990
HORVU.MOREX.r3.1HG0014350	HORVU.MOREX.r3.7HG0667610	HORVU.MOREX.r3.6HG0547510	HORVU.MOREX.r3.4HG0410920	HORVU.MOREX.r3.3HG0300770	HORVU.MOREX.r3.2HG0178590	HORVU.MOREX.r3.2HG0158000
HORVU.MOREX.r3.1HG0014380	HORVU.MOREX.r3.7HG0667620	HORVU.MOREX.r3.6HG0547550	HORVU.MOREX.r3.4HG0410930	HORVU.MOREX.r3.3HG0300790	HORVU.MOREX.r3.2HG0178600	HORVU.MOREX.r3.2HG0158020
HORVU.MOREX.r3.1HG0014400	HORVU.MOREX.r3.7HG0667630	HORVU.MOREX.r3.6HG0547570	HORVU.MOREX.r3.4HG0410950	HORVU.MOREX.r3.3HG0300810	HORVU.MOREX.r3.2HG0178620	HORVU.MOREX.r3.2HG0158070
HORVU.MOREX.r3.1HG0014410	HORVU.MOREX.r3.7HG0667660	HORVU.MOREX.r3.6HG0547590	HORVU.MOREX.r3.4HG0410980	HORVU.MOREX.r3.3HG0300820	HORVU.MOREX.r3.2HG0178630	HORVU.MOREX.r3.2HG0158080
HORVU.MOREX.r3.1HG0014430	HORVU.MOREX.r3.7HG0667680	HORVU.MOREX.r3.6HG0547600	HORVU.MOREX.r3.4HG0410990	HORVU.MOREX.r3.3HG0300830	HORVU.MOREX.r3.2HG0178640	HORVU.MOREX.r3.2HG0158100
HORVU.MOREX.r3.1HG0014440	HORVU.MOREX.r3.7HG0667690	HORVU.MOREX.r3.6HG0547620	HORVU.MOREX.r3.4HG0411000	HORVU.MOREX.r3.3HG0300870	HORVU.MOREX.r3.2HG0178660	HORVU.MOREX.r3.2HG0158110
HORVU.MOREX.r3.1HG0014490	HORVU.MOREX.r3.7HG0667710	HORVU.MOREX.r3.6HG0547660	HORVU.MOREX.r3.4HG0411010	HORVU.MOREX.r3.3HG0300880	HORVU.MOREX.r3.2HG0178680	HORVU.MOREX.r3.2HG0158120
HORVU.MOREX.r3.1HG0014500	HORVU.MOREX.r3.7HG0667720	HORVU.MOREX.r3.6HG0547680	HORVU.MOREX.r3.4HG0411020	HORVU.MOREX.r3.3HG0300890	HORVU.MOREX.r3.2HG0178690	HORVU.MOREX.r3.2HG0158150
HORVU.MOREX.r3.1HG0014520	HORVU.MOREX.r3.7HG0667730	HORVU.MOREX.r3.6HG0547690	HORVU.MOREX.r3.4HG0411030	HORVU.MOREX.r3.3HG0300900	HORVU.MOREX.r3.2HG0178700	HORVU.MOREX.r3.2HG0158160
HORVU.MOREX.r3.1HG0014530	HORVU.MOREX.r3.7HG0667750	HORVU.MOREX.r3.6HG0547700	HORVU.MOREX.r3.4HG0411040	HORVU.MOREX.r3.3HG0300910	HORVU.MOREX.r3.2HG0178720	HORVU.MOREX.r3.2HG0158170
HORVU.MOREX.r3.1HG0014540	HORVU.MOREX.r3.7HG0667760	HORVU.MOREX.r3.6HG0547720	HORVU.MOREX.r3.4HG0411050	HORVU.MOREX.r3.3HG0300920	HORVU.MOREX.r3.2HG0178740	HORVU.MOREX.r3.2HG0158180
HORVU.MOREX.r3.1HG0014550	HORVU.MOREX.r3.7HG0667770	HORVU.MOREX.r3.6HG0547730	HORVU.MOREX.r3.4HG0411090	HORVU.MOREX.r3.3HG0300930	HORVU.MOREX.r3.2HG0178750	HORVU.MOREX.r3.2HG0158200
HORVU.MOREX.r3.1HG0014560	HORVU.MOREX.r3.7HG0667780	HORVU.MOREX.r3.6HG0547750	HORVU.MOREX.r3.4HG0411100	HORVU.MOREX.r3.3HG0300950	HORVU.MOREX.r3.2HG0178760	HORVU.MOREX.r3.2HG0158210
HORVU.MOREX.r3.1HG0014570	HORVU.MOREX.r3.7HG0667790	HORVU.MOREX.r3.6HG0547770	HORVU.MOREX.r3.4HG0411110	HORVU.MOREX.r3.3HG0300960	HORVU.MOREX.r3.2HG0178780	HORVU.MOREX.r3.2HG0158230
HORVU.MOREX.r3.1HG0014580	HORVU.MOREX.r3.7HG0667800	HORVU.MOREX.r3.6HG0547780	HORVU.MOREX.r3.4HG0411120	HORVU.MOREX.r3.3HG0300970	HORVU.MOREX.r3.2HG0178800	HORVU.MOREX.r3.2HG0158260
HORVU.MOREX.r3.1HG0014590	HORVU.MOREX.r3.7HG0667820	HORVU.MOREX.r3.6HG0547800	HORVU.MOREX.r3.4HG0411150	HORVU.MOREX.r3.3HG0300980	HORVU.MOREX.r3.2HG0178810	HORVU.MOREX.r3.2HG0158270
HORVU.MOREX.r3.1HG0014620	HORVU.MOREX.r3.7HG0667840	HORVU.MOREX.r3.6HG0547820	HORVU.MOREX.r3.4HG0411160	HORVU.MOREX.r3.3HG0301000	HORVU.MOREX.r3.2HG0178820	HORVU.MOREX.r3.2HG0158290
HORVU.MOREX.r3.1HG0014640	HORVU.MOREX.r3.7HG0667850	HORVU.MOREX.r3.6HG0547830	HORVU.MOREX.r3.4HG0411170	HORVU.MOREX.r3.3HG0301010	HORVU.MOREX.r3.2HG0178840	HORVU.MOREX.r3.2HG0158300
HORVU.MOREX.r3.1HG0014650	HORVU.MOREX.r3.7HG0667880	HORVU.MOREX.r3.6HG0547850	HORVU.MOREX.r3.4HG0411180	HORVU.MOREX.r3.3HG0301020	HORVU.MOREX.r3.2HG0178850	HORVU.MOREX.r3.2HG0158310
HORVU.MOREX.r3.1HG0014660	HORVU.MOREX.r3.7HG0667900	HORVU.MOREX.r3.6HG0547890	HORVU.MOREX.r3.4HG0411190	HORVU.MOREX.r3.3HG0301030	HORVU.MOREX.r3.2HG0178880	HORVU.MOREX.r3.2HG0158350
HORVU.MOREX.r3.1HG0014680	HORVU.MOREX.r3.7HG0667910	HORVU.MOREX.r3.6HG0547910	HORVU.MOREX.r3.4HG0411210	HORVU.MOREX.r3.3HG0301040	HORVU.MOREX.r3.2HG0178900	HORVU.MOREX.r3.2HG0158360
HORVU.MOREX.r3.1HG0014690	HORVU.MOREX.r3.7HG0667920	HORVU.MOREX.r3.6HG0547920	HORVU.MOREX.r3.4HG0411230	HORVU.MOREX.r3.3HG0301080	HORVU.MOREX.r3.2HG0178910	HORVU.MOREX.r3.2HG0158370
HORVU.MOREX.r3.1HG0014700	HORVU.MOREX.r3.7HG0667940	HORVU.MOREX.r3.6HG0547930	HORVU.MOREX.r3.4HG0411240	HORVU.MOREX.r3.3HG0301090	HORVU.MOREX.r3.2HG0178930	HORVU.MOREX.r3.2HG0158390
HORVU.MOREX.r3.1HG0014710	HORVU.MOREX.r3.7HG0668040	HORVU.MOREX.r3.6HG0547970	HORVU.MOREX.r3.4HG0411270	HORVU.MOREX.r3.3HG0301110	HORVU.MOREX.r3.2HG0178940	HORVU.MOREX.r3.2HG0158410
HORVU.MOREX.r3.1HG0014730	HORVU.MOREX.r3.7HG0668080	HORVU.MOREX.r3.6HG0547990	HORVU.MOREX.r3.4HG0411290	HORVU.MOREX.r3.3HG0301130	HORVU.MOREX.r3.2HG0178960	HORVU.MOREX.r3.2HG0158440
HORVU.MOREX.r3.1HG0014740	HORVU.MOREX.r3.7HG0668090	HORVU.MOREX.r3.6HG0548000	HORVU.MOREX.r3.4HG0411300	HORVU.MOREX.r3.3HG0301170	HORVU.MOREX.r3.2HG0178990	HORVU.MOREX.r3.2HG0158470
HORVU.MOREX.r3.1HG0014790	HORVU.MOREX.r3.7HG0668100	HORVU.MOREX.r3.6HG0548020	HORVU.MOREX.r3.4HG0411310	HORVU.MOREX.r3.3HG0301210	HORVU.MOREX.r3.2HG0179060	HORVU.MOREX.r3.2HG0158500
HORVU.MOREX.r3.1HG0014800	HORVU.MOREX.r3.7HG0668110	HORVU.MOREX.r3.6HG0548030	HORVU.MOREX.r3.4HG0411320	HORVU.MOREX.r3.3HG0301250	HORVU.MOREX.r3.2HG0179100	HORVU.MOREX.r3.2HG0158580
HORVU.MOREX.r3.1HG0014850	HORVU.MOREX.r3.7HG0668120	HORVU.MOREX.r3.6HG0548050	HORVU.MOREX.r3.4HG0411330	HORVU.MOREX.r3.3HG0301260	HORVU.MOREX.r3.2HG0179110	HORVU.MOREX.r3.2HG0158590
HORVU.MOREX.r3.1HG0014890	HORVU.MOREX.r3.7HG0668180	HORVU.MOREX.r3.6HG0548060	HORVU.MOREX.r3.4HG0411360	HORVU.MOREX.r3.3HG0301270	HORVU.MOREX.r3.2HG0179120	HORVU.MOREX.r3.2HG0158620
HORVU.MOREX.r3.1HG0014910	HORVU.MOREX.r3.7HG0668190	HORVU.MOREX.r3.6HG0548070	HORVU.MOREX.r3.4HG0411370	HORVU.MOREX.r3.3HG0301300	HORVU.MOREX.r3.2HG0179190	HORVU.MOREX.r3.2HG0158640
HORVU.MOREX.r3.1HG0014930	HORVU.MOREX.r3.7HG0668210	HORVU.MOREX.r3.6HG0548110	HORVU.MOREX.r3.4HG0411380	HORVU.MOREX.r3.3HG0301330	HORVU.MOREX.r3.2HG0179200	HORVU.MOREX.r3.2HG0158660
HORVU.MOREX.r3.1HG0015000	HORVU.MOREX.r3.7HG0668240	HORVU.MOREX.r3.6HG0548150	HORVU.MOREX.r3.4HG0411400	HORVU.MOREX.r3.3HG0301370	HORVU.MOREX.r3.2HG0179210	HORVU.MOREX.r3.2HG0158680
HORVU.MOREX.r3.1HG0015080	HORVU.MOREX.r3.7HG0668250	HORVU.MOREX.r3.6HG0548160	HORVU.MOREX.r3.4HG0411420	HORVU.MOREX.r3.3HG0301390	HORVU.MOREX.r3.2HG0179260	HORVU.MOREX.r3.2HG0158690
HORVU.MOREX.r3.1HG0015090	HORVU.MOREX.r3.7HG0668260	HORVU.MOREX.r3.6HG0548180	HORVU.MOREX.r3.4HG0411430	HORVU.MOREX.r3.3HG0301400	HORVU.MOREX.r3.2HG0179270	HORVU.MOREX.r3.2HG0158760
HORVU.MOREX.r3.1HG0015110	HORVU.MOREX.r3.7HG0668310	HORVU.MOREX.r3.6HG0548190	HORVU.MOREX.r3.4HG0411440	HORVU.MOREX.r3.3HG0301430	HORVU.MOREX.r3.2HG0179290	HORVU.MOREX.r3.2HG0158800
HORVU.MOREX.r3.1HG0015120	HORVU.MOREX.r3.7HG0668320	HORVU.MOREX.r3.6HG0548200	HORVU.MOREX.r3.4HG0411460	HORVU.MOREX.r3.3HG0301480	HORVU.MOREX.r3.2HG0179310	HORVU.MOREX.r3.2HG0158810
HORVU.MOREX.r3.1HG0015130	HORVU.MOREX.r3.7HG0668330	HORVU.MOREX.r3.6HG0548210	HORVU.MOREX.r3.4HG0411500	HORVU.MOREX.r3.3HG0301510	HORVU.MOREX.r3.2HG0179320	HORVU.MOREX.r3.2HG0158820
HORVU.MOREX.r3.1HG0015170	HORVU.MOREX.r3.7HG0668340	HORVU.MOREX.r3.6HG0548220	HORVU.MOREX.r3.4HG0411520	HORVU.MOREX.r3.3HG0301520	HORVU.MOREX.r3.2HG0179330	HORVU.MOREX.r3.2HG0158850
HORVU.MOREX.r3.1HG0015180	HORVU.MOREX.r3.7HG0668380	HORVU.MOREX.r3.6HG0548250	HORVU.MOREX.r3.4HG0411530	HORVU.MOREX.r3.3HG0301530	HORVU.MOREX.r3.2HG0179360	HORVU.MOREX.r3.2HG0158870
HORVU.MOREX.r3.1HG0015190	HORVU.MOREX.r3.7HG0668390	HORVU.MOREX.r3.6HG0548270	HORVU.MOREX.r3.4HG0411550	HORVU.MOREX.r3.3HG0301540	HORVU.MOREX.r3.2HG0179400	HORVU.MOREX.r3.2HG0158880
HORVU.MOREX.r3.1HG0015240	HORVU.MOREX.r3.7HG0668400	HORVU.MOREX.r3.6HG0548290	HORVU.MOREX.r3.4HG0411570	HORVU.MOREX.r3.3HG0301550	HORVU.MOREX.r3.2HG0179410	HORVU.MOREX.r3.2HG0158890
HORVU.MOREX.r3.1HG0015250	HORVU.MOREX.r3.7HG0668410	HORVU.MOREX.r3.6HG0548300	HORVU.MOREX.r3.4HG0411580	HORVU.MOREX.r3.3HG0301580	HORVU.MOREX.r3.2HG0179430	HORVU.MOREX.r3.2HG0158900
HORVU.MOREX.r3.1HG0015270	HORVU.MOREX.r3.7HG0668430	HORVU.MOREX.r3.6HG0548310	HORVU.MOREX.r3.4HG0411590	HORVU.MOREX.r3.3HG0301650	HORVU.MOREX.r3.2HG0179460	HORVU.MOREX.r3.2HG0158950
HORVU.MOREX.r3.1HG0015290	HORVU.MOREX.r3.7HG0668440	HORVU.MOREX.r3.6HG0548320	HORVU.MOREX.r3.4HG0411620	HORVU.MOREX.r3.3HG0301700	HORVU.MOREX.r3.2HG0179480	HORVU.MOREX.r3.2HG0159000
HORVU.MOREX.r3.1HG0015330	HORVU.MOREX.r3.7HG0668450	HORVU.MOREX.r3.6HG0548330	HORVU.MOREX.r3.4HG0411630	HORVU.MOREX.r3.3HG0301710	HORVU.MOREX.r3.2HG0179520	HORVU.MOREX.r3.2HG0159010
HORVU.MOREX.r3.1HG0015360	HORVU.MOREX.r3.7HG0668470	HORVU.MOREX.r3.6HG0548350	HORVU.MOREX.r3.4HG0411680	HORVU.MOREX.r3.3HG0301720	HORVU.MOREX.r3.2HG0179540	HORVU.MOREX.r3.2HG0159020
HORVU.MOREX.r3.1HG0015390	HORVU.MOREX.r3.7HG0668500	HORVU.MOREX.r3.6HG0548360	HORVU.MOREX.r3.4HG0411700	HORVU.MOREX.r3.3HG0301750	HORVU.MOREX.r3.2HG0179550	HORVU.MOREX.r3.2HG0159040
HORVU.MOREX.r3.1HG0015420	HORVU.MOREX.r3.7HG0668510	HORVU.MOREX.r3.6HG0548370	HORVU.MOREX.r3.4HG0411730	HORVU.MOREX.r3.3HG0301770	HORVU.MOREX.r3.2HG0179560	HORVU.MOREX.r3.2HG0159100
HORVU.MOREX.r3.1HG0015430	HORVU.MOREX.r3.7HG0668550	HORVU.MOREX.r3.6HG0548380	HORVU.MOREX.r3.4HG0411740	HORVU.MOREX.r3.3HG0301780	HORVU.MOREX.r3.2HG0179570	HORVU.MOREX.r3.2HG0159130
HORVU.MOREX.r3.1HG0015460	HORVU.MOREX.r3.7HG0668560	HORVU.MOREX.r3.6HG0548390	HORVU.MOREX.r3.4HG0411750	HORVU.MOREX.r3.3HG0301790	HORVU.MOREX.r3.2HG0179580	HORVU.MOREX.r3.2HG0159150
HORVU.MOREX.r3.1HG0015470	HORVU.MOREX.r3.7HG0668600	HORVU.MOREX.r3.6HG0548400	HORVU.MOREX.r3.4HG0411760	HORVU.MOREX.r3.3HG0301800	HORVU.MOREX.r3.2HG0179640	HORVU.MOREX.r3.2HG0159190
HORVU.MOREX.r3.1HG0015480	HORVU.MOREX.r3.7HG0668640	HORVU.MOREX.r3.6HG0548410	HORVU.MOREX.r3.4HG0411810	HORVU.MOREX.r3.3HG0301810	HORVU.MOREX.r3.2HG0179650	HORVU.MOREX.r3.2HG0159200
HORVU.MOREX.r3.1HG0015510	HORVU.MOREX.r3.7HG0668680	HORVU.MOREX.r3.6HG0548420	HORVU.MOREX.r3.4HG0411820	HORVU.MOREX.r3.3HG0301820	HORVU.MOREX.r3.2HG0179660	HORVU.MOREX.r3.2HG0159210
HORVU.MOREX.r3.1HG0015520	HORVU.MOREX.r3.7HG0668700	HORVU.MOREX.r3.6HG0548430	HORVU.MOREX.r3.4HG0411830	HORVU.MOREX.r3.3HG0301830	HORVU.MOREX.r3.2HG0179670	HORVU.MOREX.r3.2HG0159250
HORVU.MOREX.r3.1HG0015530	HORVU.MOREX.r3.7HG0668720	HORVU.MOREX.r3.6HG0548450	HORVU.MOREX.r3.4HG0411840	HORVU.MOREX.r3.3HG0301840	HORVU.MOREX.r3.2HG0179680	HORVU.MOREX.r3.2HG0159270
HORVU.MOREX.r3.1HG0015610	HORVU.MOREX.r3.7HG0668730	HORVU.MOREX.r3.6HG0548460	HORVU.MOREX.r3.4HG0411870	HORVU.MOREX.r3.3HG0301850	HORVU.MOREX.r3.2HG0179690	HORVU.MOREX.r3.2HG0159280
HORVU.MOREX.r3.1HG0015620	HORVU.MOREX.r3.7HG0668740	HORVU.MOREX.r3.6HG0548470	HORVU.MOREX.r3.4HG0411890	HORVU.MOREX.r3.3HG0301880	HORVU.MOREX.r3.2HG0179700	HORVU.MOREX.r3.2HG0159290
HORVU.MOREX.r3.1HG0015640	HORVU.MOREX.r3.7HG0668760	HORVU.MOREX.r3.6HG0548480	HORVU.MOREX.r3.4HG0411900	HORVU.MOREX.r3.3HG0301890	HORVU.MOREX.r3.2HG0179740	HORVU.MOREX.r3.2HG0159310
HORVU.MOREX.r3.1HG0015670	HORVU.MOREX.r3.7HG0668770	HORVU.MOREX.r3.6HG0548510	HORVU.MOREX.r3.4HG0411910	HORVU.MOREX.r3.3HG0301900	HORVU.MOREX.r3.2HG0179780	HORVU.MOREX.r3.2HG0159330
HORVU.MOREX.r3.1HG0015680	HORVU.MOREX.r3.7HG0668800	HORVU.MOREX.r3.6HG0548520	HORVU.MOREX.r3.4HG0411930	HORVU.MOREX.r3.3HG0301920	HORVU.MOREX.r3.2HG0179790	HORVU.MOREX.r3.2HG0159340
HORVU.MOREX.r3.1HG0015720	HORVU.MOREX.r3.7HG0668820	HORVU.MOREX.r3.6HG0548530	HORVU.MOREX.r3.4HG0411940	HORVU.MOREX.r3.3HG0301930	HORVU.MOREX.r3.2HG0179810	HORVU.MOREX.r3.2HG0159350
HORVU.MOREX.r3.1HG0015740	HORVU.MOREX.r3.7HG0668850	HORVU.MOREX.r3.6HG0548580	HORVU.MOREX.r3.4HG0411950	HORVU.MOREX.r3.3HG0301950	HORVU.MOREX.r3.2HG0179870	HORVU.MOREX.r3.2HG0159360
HORVU.MOREX.r3.1HG0015750	HORVU.MOREX.r3.7HG0668880	HORVU.MOREX.r3.6HG0548590	HORVU.MOREX.r3.4HG0411960	HORVU.MOREX.r3.3HG0301960	HORVU.MOREX.r3.2HG0179890	HORVU.MOREX.r3.2HG0159370
HORVU.MOREX.r3.1HG0015760	HORVU.MOREX.r3.7HG0668890	HORVU.MOREX.r3.6HG0548600	HORVU.MOREX.r3.4HG0411980	HORVU.MOREX.r3.3HG0301970	HORVU.MOREX.r3.2HG0179900	HORVU.MOREX.r3.2HG0159380
HORVU.MOREX.r3.1HG0015780	HORVU.MOREX.r3.7HG0668900	HORVU.MOREX.r3.6HG0548630	HORVU.MOREX.r3.4HG0412030	HORVU.MOREX.r3.3HG0301980	HORVU.MOREX.r3.2HG0179910	HORVU.MOREX.r3.2HG0159400
HORVU.MOREX.r3.1HG0015790	HORVU.MOREX.r3.7HG0668940	HORVU.MOREX.r3.6HG0548640	HORVU.MOREX.r3.4HG0412040	HORVU.MOREX.r3.3HG0301990	HORVU.MOREX.r3.2HG0179920	HORVU.MOREX.r3.2HG0159420
HORVU.MOREX.r3.1HG0015890	HORVU.MOREX.r3.7HG0668950	HORVU.MOREX.r3.6HG0548650	HORVU.MOREX.r3.4HG0412050	HORVU.MOREX.r3.3HG0302000	HORVU.MOREX.r3.2HG0179930	HORVU.MOREX.r3.2HG0159440
HORVU.MOREX.r3.1HG0015960	HORVU.MOREX.r3.7HG0668970	HORVU.MOREX.r3.6HG0548660	HORVU.MOREX.r3.4HG0412080	HORVU.MOREX.r3.3HG0302020	HORVU.MOREX.r3.2HG0179940	HORVU.MOREX.r3.2HG0159460
HORVU.MOREX.r3.1HG0015990	HORVU.MOREX.r3.7HG0669010	HORVU.MOREX.r3.6HG0548670	HORVU.MOREX.r3.4HG0412090	HORVU.MOREX.r3.3HG0302030	HORVU.MOREX.r3.2HG0179950	HORVU.MOREX.r3.2HG0159520
HORVU.MOREX.r3.1HG0016030	HORVU.MOREX.r3.7HG0669020	HORVU.MOREX.r3.6HG0548700	HORVU.MOREX.r3.4HG0412120	HORVU.MOREX.r3.3HG0302040	HORVU.MOREX.r3.2HG0179970	HORVU.MOREX.r3.2HG0159540
HORVU.MOREX.r3.1HG0016050	HORVU.MOREX.r3.7HG0669030	HORVU.MOREX.r3.6HG0548710	HORVU.MOREX.r3.4HG0412140	HORVU.MOREX.r3.3HG0302050	HORVU.MOREX.r3.2HG0180010	HORVU.MOREX.r3.2HG0159580
HORVU.MOREX.r3.1HG0016090	HORVU.MOREX.r3.7HG0669040	HORVU.MOREX.r3.6HG0548770	HORVU.MOREX.r3.4HG0412150	HORVU.MOREX.r3.3HG0302060	HORVU.MOREX.r3.2HG0180020	HORVU.MOREX.r3.2HG0159590
HORVU.MOREX.r3.1HG0016100	HORVU.MOREX.r3.7HG0669060	HORVU.MOREX.r3.6HG0548780	HORVU.MOREX.r3.4HG0412180	HORVU.MOREX.r3.3HG0302070	HORVU.MOREX.r3.2HG0180030	HORVU.MOREX.r3.2HG0159600
HORVU.MOREX.r3.1HG0016110	HORVU.MOREX.r3.7HG0669070	HORVU.MOREX.r3.6HG0548800	HORVU.MOREX.r3.4HG0412200	HORVU.MOREX.r3.3HG0302080	HORVU.MOREX.r3.2HG0180040	HORVU.MOREX.r3.2HG0159620
HORVU.MOREX.r3.1HG0016120	HORVU.MOREX.r3.7HG0669110	HORVU.MOREX.r3.6HG0548810	HORVU.MOREX.r3.4HG0412230	HORVU.MOREX.r3.3HG0302090	HORVU.MOREX.r3.2HG0180060	HORVU.MOREX.r3.2HG0159630
HORVU.MOREX.r3.1HG0016130	HORVU.MOREX.r3.7HG0669120	HORVU.MOREX.r3.6HG0548830	HORVU.MOREX.r3.4HG0412240	HORVU.MOREX.r3.3HG0302100	HORVU.MOREX.r3.2HG0180080	HORVU.MOREX.r3.2HG0159700
HORVU.MOREX.r3.1HG0016150	HORVU.MOREX.r3.7HG0669140	HORVU.MOREX.r3.6HG0548840	HORVU.MOREX.r3.4HG0412250	HORVU.MOREX.r3.3HG0302110	HORVU.MOREX.r3.2HG0180090	HORVU.MOREX.r3.2HG0159720
HORVU.MOREX.r3.1HG0016160	HORVU.MOREX.r3.7HG0669150	HORVU.MOREX.r3.6HG0548850	HORVU.MOREX.r3.4HG0412260	HORVU.MOREX.r3.3HG0302120	HORVU.MOREX.r3.2HG0180100	HORVU.MOREX.r3.2HG0159730
HORVU.MOREX.r3.1HG0016170	HORVU.MOREX.r3.7HG0669170	HORVU.MOREX.r3.6HG0548860	HORVU.MOREX.r3.4HG0412270	HORVU.MOREX.r3.3HG0302140	HORVU.MOREX.r3.2HG0180110	HORVU.MOREX.r3.2HG0159740
HORVU.MOREX.r3.1HG0016190	HORVU.MOREX.r3.7HG0669180	HORVU.MOREX.r3.6HG0548870	HORVU.MOREX.r3.4HG0412290	HORVU.MOREX.r3.3HG0302160	HORVU.MOREX.r3.2HG0180180	HORVU.MOREX.r3.2HG0159750
HORVU.MOREX.r3.1HG0016200	HORVU.MOREX.r3.7HG0669190	HORVU.MOREX.r3.6HG0548880	HORVU.MOREX.r3.4HG0412300	HORVU.MOREX.r3.3HG0302170	HORVU.MOREX.r3.2HG0180210	HORVU.MOREX.r3.2HG0159780
HORVU.MOREX.r3.1HG0016210	HORVU.MOREX.r3.7HG0669220	HORVU.MOREX.r3.6HG0548900	HORVU.MOREX.r3.4HG0412310	HORVU.MOREX.r3.3HG0302180	HORVU.MOREX.r3.2HG0180240	HORVU.MOREX.r3.2HG0159790
HORVU.MOREX.r3.1HG0016240	HORVU.MOREX.r3.7HG0669230	HORVU.MOREX.r3.6HG0548920	HORVU.MOREX.r3.4HG0412320	HORVU.MOREX.r3.3HG0302230	HORVU.MOREX.r3.2HG0180250	HORVU.MOREX.r3.2HG0159890
HORVU.MOREX.r3.1HG0016260	HORVU.MOREX.r3.7HG0669240	HORVU.MOREX.r3.6HG0548930	HORVU.MOREX.r3.4HG0412330	HORVU.MOREX.r3.3HG0302260	HORVU.MOREX.r3.2HG0180280	HORVU.MOREX.r3.2HG0159920
HORVU.MOREX.r3.1HG0016290	HORVU.MOREX.r3.7HG0669250	HORVU.MOREX.r3.6HG0548940	HORVU.MOREX.r3.4HG0412340	HORVU.MOREX.r3.3HG0302280	HORVU.MOREX.r3.2HG0180310	HORVU.MOREX.r3.2HG0159940
HORVU.MOREX.r3.1HG0016310	HORVU.MOREX.r3.7HG0669270	HORVU.MOREX.r3.6HG0548950	HORVU.MOREX.r3.4HG0412360	HORVU.MOREX.r3.3HG0302300	HORVU.MOREX.r3.2HG0180320	HORVU.MOREX.r3.2HG0159970
HORVU.MOREX.r3.1HG0016340	HORVU.MOREX.r3.7HG0669280	HORVU.MOREX.r3.6HG0548960	HORVU.MOREX.r3.4HG0412370	HORVU.MOREX.r3.3HG0302310	HORVU.MOREX.r3.2HG0180340	HORVU.MOREX.r3.2HG0159990
HORVU.MOREX.r3.1HG0016360	HORVU.MOREX.r3.7HG0669290	HORVU.MOREX.r3.6HG0548980	HORVU.MOREX.r3.4HG0412380	HORVU.MOREX.r3.3HG0302320	HORVU.MOREX.r3.2HG0180360	HORVU.MOREX.r3.2HG0160010
HORVU.MOREX.r3.1HG0016370	HORVU.MOREX.r3.7HG0669300	HORVU.MOREX.r3.6HG0548990	HORVU.MOREX.r3.4HG0412420	HORVU.MOREX.r3.3HG0302340	HORVU.MOREX.r3.2HG0180380	HORVU.MOREX.r3.2HG0160030
HORVU.MOREX.r3.1HG0016410	HORVU.MOREX.r3.7HG0669320	HORVU.MOREX.r3.6HG0549010	HORVU.MOREX.r3.4HG0412430	HORVU.MOREX.r3.3HG0302390	HORVU.MOREX.r3.2HG0180410	HORVU.MOREX.r3.2HG0160060
HORVU.MOREX.r3.1HG0016450	HORVU.MOREX.r3.7HG0669330	HORVU.MOREX.r3.6HG0549030	HORVU.MOREX.r3.4HG0412450	HORVU.MOREX.r3.3HG0302430	HORVU.MOREX.r3.2HG0180420	HORVU.MOREX.r3.2HG0160080
HORVU.MOREX.r3.1HG0016480	HORVU.MOREX.r3.7HG0669340	HORVU.MOREX.r3.6HG0549040	HORVU.MOREX.r3.4HG0412460	HORVU.MOREX.r3.3HG0302440	HORVU.MOREX.r3.2HG0180430	HORVU.MOREX.r3.2HG0160090
HORVU.MOREX.r3.1HG0016510	HORVU.MOREX.r3.7HG0669350	HORVU.MOREX.r3.6HG0549050	HORVU.MOREX.r3.4HG0412480	HORVU.MOREX.r3.3HG0302460	HORVU.MOREX.r3.2HG0180440	HORVU.MOREX.r3.2HG0160130
HORVU.MOREX.r3.1HG0016530	HORVU.MOREX.r3.7HG0669360	HORVU.MOREX.r3.6HG0549060	HORVU.MOREX.r3.4HG0412490	HORVU.MOREX.r3.3HG0302500	HORVU.MOREX.r3.2HG0180450	HORVU.MOREX.r3.2HG0160150
HORVU.MOREX.r3.1HG0016550	HORVU.MOREX.r3.7HG0669380	HORVU.MOREX.r3.6HG0549180	HORVU.MOREX.r3.4HG0412500	HORVU.MOREX.r3.3HG0302510	HORVU.MOREX.r3.2HG0180460	HORVU.MOREX.r3.2HG0160160
HORVU.MOREX.r3.1HG0016580	HORVU.MOREX.r3.7HG0669390	HORVU.MOREX.r3.6HG0549210	HORVU.MOREX.r3.4HG0412540	HORVU.MOREX.r3.3HG0302520	HORVU.MOREX.r3.2HG0180480	HORVU.MOREX.r3.2HG0160170
HORVU.MOREX.r3.1HG0016590	HORVU.MOREX.r3.7HG0669420	HORVU.MOREX.r3.6HG0549320	HORVU.MOREX.r3.4HG0412550	HORVU.MOREX.r3.3HG0302570	HORVU.MOREX.r3.2HG0180490	HORVU.MOREX.r3.2HG0160240
HORVU.MOREX.r3.1HG0016620	HORVU.MOREX.r3.7HG0669440	HORVU.MOREX.r3.6HG0549330	HORVU.MOREX.r3.4HG0412560	HORVU.MOREX.r3.3HG0302590	HORVU.MOREX.r3.2HG0180500	HORVU.MOREX.r3.2HG0160260
HORVU.MOREX.r3.1HG0016660	HORVU.MOREX.r3.7HG0669480	HORVU.MOREX.r3.6HG0549340	HORVU.MOREX.r3.4HG0412570	HORVU.MOREX.r3.3HG0302610	HORVU.MOREX.r3.2HG0180510	HORVU.MOREX.r3.2HG0160290
HORVU.MOREX.r3.1HG0016680	HORVU.MOREX.r3.7HG0669490	HORVU.MOREX.r3.6HG0549360	HORVU.MOREX.r3.4HG0412600	HORVU.MOREX.r3.3HG0302620	HORVU.MOREX.r3.2HG0180530	HORVU.MOREX.r3.2HG0160310
HORVU.MOREX.r3.1HG0016710	HORVU.MOREX.r3.7HG0669500	HORVU.MOREX.r3.6HG0549370	HORVU.MOREX.r3.4HG0412610	HORVU.MOREX.r3.3HG0302630	HORVU.MOREX.r3.2HG0180550	HORVU.MOREX.r3.2HG0160350
HORVU.MOREX.r3.1HG0016730	HORVU.MOREX.r3.7HG0669510	HORVU.MOREX.r3.6HG0549380	HORVU.MOREX.r3.4HG0412620	HORVU.MOREX.r3.3HG0302650	HORVU.MOREX.r3.2HG0180580	HORVU.MOREX.r3.2HG0160480
HORVU.MOREX.r3.1HG0016740	HORVU.MOREX.r3.7HG0669520	HORVU.MOREX.r3.6HG0549420	HORVU.MOREX.r3.4HG0412630	HORVU.MOREX.r3.3HG0302660	HORVU.MOREX.r3.2HG0180590	HORVU.MOREX.r3.2HG0160510
HORVU.MOREX.r3.1HG0016760	HORVU.MOREX.r3.7HG0669530	HORVU.MOREX.r3.6HG0549430	HORVU.MOREX.r3.4HG0412640	HORVU.MOREX.r3.3HG0302670	HORVU.MOREX.r3.2HG0180630	HORVU.MOREX.r3.2HG0160550
HORVU.MOREX.r3.1HG0016770	HORVU.MOREX.r3.7HG0669540	HORVU.MOREX.r3.6HG0549470	HORVU.MOREX.r3.4HG0412650	HORVU.MOREX.r3.3HG0302680	HORVU.MOREX.r3.2HG0180650	HORVU.MOREX.r3.2HG0160560
HORVU.MOREX.r3.1HG0016790	HORVU.MOREX.r3.7HG0669580	HORVU.MOREX.r3.6HG0549480	HORVU.MOREX.r3.4HG0412680	HORVU.MOREX.r3.3HG0302700	HORVU.MOREX.r3.2HG0180660	HORVU.MOREX.r3.2HG0160570
HORVU.MOREX.r3.1HG0016810	HORVU.MOREX.r3.7HG0669590	HORVU.MOREX.r3.6HG0549500	HORVU.MOREX.r3.4HG0412720	HORVU.MOREX.r3.3HG0302730	HORVU.MOREX.r3.2HG0180670	HORVU.MOREX.r3.2HG0160590
HORVU.MOREX.r3.1HG0016820	HORVU.MOREX.r3.7HG0669600	HORVU.MOREX.r3.6HG0549510	HORVU.MOREX.r3.4HG0412730	HORVU.MOREX.r3.3HG0302740	HORVU.MOREX.r3.2HG0180680	HORVU.MOREX.r3.2HG0160610
HORVU.MOREX.r3.1HG0016840	HORVU.MOREX.r3.7HG0669610	HORVU.MOREX.r3.6HG0549520	HORVU.MOREX.r3.4HG0412740	HORVU.MOREX.r3.3HG0302750	HORVU.MOREX.r3.2HG0180690	HORVU.MOREX.r3.2HG0160620
HORVU.MOREX.r3.1HG0016850	HORVU.MOREX.r3.7HG0669620	HORVU.MOREX.r3.6HG0549530	HORVU.MOREX.r3.4HG0412750	HORVU.MOREX.r3.3HG0302770	HORVU.MOREX.r3.2HG0180710	HORVU.MOREX.r3.2HG0160680
HORVU.MOREX.r3.1HG0016910	HORVU.MOREX.r3.7HG0669630	HORVU.MOREX.r3.6HG0549540	HORVU.MOREX.r3.4HG0412760	HORVU.MOREX.r3.3HG0302780	HORVU.MOREX.r3.2HG0180720	HORVU.MOREX.r3.2HG0160690
HORVU.MOREX.r3.1HG0016940	HORVU.MOREX.r3.7HG0669660	HORVU.MOREX.r3.6HG0549550	HORVU.MOREX.r3.4HG0412770	HORVU.MOREX.r3.3HG0302790	HORVU.MOREX.r3.2HG0180730	HORVU.MOREX.r3.2HG0160700
HORVU.MOREX.r3.1HG0016950	HORVU.MOREX.r3.7HG0669710	HORVU.MOREX.r3.6HG0549580	HORVU.MOREX.r3.4HG0412780	HORVU.MOREX.r3.3HG0302800	HORVU.MOREX.r3.2HG0180740	HORVU.MOREX.r3.2HG0160710
HORVU.MOREX.r3.1HG0017020	HORVU.MOREX.r3.7HG0669720	HORVU.MOREX.r3.6HG0549630	HORVU.MOREX.r3.4HG0412790	HORVU.MOREX.r3.3HG0302810	HORVU.MOREX.r3.2HG0180750	HORVU.MOREX.r3.2HG0160760
HORVU.MOREX.r3.1HG0017040	HORVU.MOREX.r3.7HG0669730	HORVU.MOREX.r3.6HG0549660	HORVU.MOREX.r3.4HG0412800	HORVU.MOREX.r3.3HG0302850	HORVU.MOREX.r3.2HG0180780	HORVU.MOREX.r3.2HG0160770
HORVU.MOREX.r3.1HG0017050	HORVU.MOREX.r3.7HG0669750	HORVU.MOREX.r3.6HG0549750	HORVU.MOREX.r3.4HG0412830	HORVU.MOREX.r3.3HG0302860	HORVU.MOREX.r3.2HG0180800	HORVU.MOREX.r3.2HG0160790
HORVU.MOREX.r3.1HG0017060	HORVU.MOREX.r3.7HG0669760	HORVU.MOREX.r3.6HG0549770	HORVU.MOREX.r3.4HG0412870	HORVU.MOREX.r3.3HG0302870	HORVU.MOREX.r3.2HG0180810	HORVU.MOREX.r3.2HG0160800
HORVU.MOREX.r3.1HG0017070	HORVU.MOREX.r3.7HG0669780	HORVU.MOREX.r3.6HG0549780	HORVU.MOREX.r3.4HG0412900	HORVU.MOREX.r3.3HG0302880	HORVU.MOREX.r3.2HG0180820	HORVU.MOREX.r3.2HG0160820
HORVU.MOREX.r3.1HG0017080	HORVU.MOREX.r3.7HG0669790	HORVU.MOREX.r3.6HG0549790	HORVU.MOREX.r3.4HG0412910	HORVU.MOREX.r3.3HG0302890	HORVU.MOREX.r3.2HG0180830	HORVU.MOREX.r3.2HG0160850
HORVU.MOREX.r3.1HG0017090	HORVU.MOREX.r3.7HG0669850	HORVU.MOREX.r3.6HG0549810	HORVU.MOREX.r3.4HG0412930	HORVU.MOREX.r3.3HG0302910	HORVU.MOREX.r3.2HG0180850	HORVU.MOREX.r3.2HG0160870
HORVU.MOREX.r3.1HG0017100	HORVU.MOREX.r3.7HG0669880	HORVU.MOREX.r3.6HG0549830	HORVU.MOREX.r3.4HG0412980	HORVU.MOREX.r3.3HG0302930	HORVU.MOREX.r3.2HG0180860	HORVU.MOREX.r3.2HG0160920
HORVU.MOREX.r3.1HG0017110	HORVU.MOREX.r3.7HG0669890	HORVU.MOREX.r3.6HG0549850	HORVU.MOREX.r3.4HG0412990	HORVU.MOREX.r3.3HG0302970	HORVU.MOREX.r3.2HG0180880	HORVU.MOREX.r3.2HG0160940
HORVU.MOREX.r3.1HG0017130	HORVU.MOREX.r3.7HG0669910	HORVU.MOREX.r3.6HG0549860	HORVU.MOREX.r3.4HG0413000	HORVU.MOREX.r3.3HG0302980	HORVU.MOREX.r3.2HG0180890	HORVU.MOREX.r3.2HG0160950
HORVU.MOREX.r3.1HG0017140	HORVU.MOREX.r3.7HG0669930	HORVU.MOREX.r3.6HG0549870	HORVU.MOREX.r3.4HG0413020	HORVU.MOREX.r3.3HG0302990	HORVU.MOREX.r3.2HG0180900	HORVU.MOREX.r3.2HG0160970
HORVU.MOREX.r3.1HG0017150	HORVU.MOREX.r3.7HG0669960	HORVU.MOREX.r3.6HG0549890	HORVU.MOREX.r3.4HG0413030	HORVU.MOREX.r3.3HG0303000	HORVU.MOREX.r3.2HG0180930	HORVU.MOREX.r3.2HG0160980
HORVU.MOREX.r3.1HG0017240	HORVU.MOREX.r3.7HG0670000	HORVU.MOREX.r3.6HG0549900	HORVU.MOREX.r3.4HG0413050	HORVU.MOREX.r3.3HG0303020	HORVU.MOREX.r3.2HG0180950	HORVU.MOREX.r3.2HG0160990
HORVU.MOREX.r3.1HG0017250	HORVU.MOREX.r3.7HG0670010	HORVU.MOREX.r3.6HG0549910	HORVU.MOREX.r3.4HG0413070	HORVU.MOREX.r3.3HG0303030	HORVU.MOREX.r3.2HG0180960	HORVU.MOREX.r3.2HG0161000
HORVU.MOREX.r3.1HG0017280	HORVU.MOREX.r3.7HG0670020	HORVU.MOREX.r3.6HG0549920	HORVU.MOREX.r3.4HG0413100	HORVU.MOREX.r3.3HG0303050	HORVU.MOREX.r3.2HG0181010	HORVU.MOREX.r3.2HG0161020
HORVU.MOREX.r3.1HG0017310	HORVU.MOREX.r3.7HG0670040	HORVU.MOREX.r3.6HG0549930	HORVU.MOREX.r3.4HG0413120	HORVU.MOREX.r3.3HG0303060	HORVU.MOREX.r3.2HG0181020	HORVU.MOREX.r3.2HG0161040
HORVU.MOREX.r3.1HG0017340	HORVU.MOREX.r3.7HG0670050	HORVU.MOREX.r3.6HG0549940	HORVU.MOREX.r3.4HG0413160	HORVU.MOREX.r3.3HG0303070	HORVU.MOREX.r3.2HG0181030	HORVU.MOREX.r3.2HG0161050
HORVU.MOREX.r3.1HG0017350	HORVU.MOREX.r3.7HG0670060	HORVU.MOREX.r3.6HG0549950	HORVU.MOREX.r3.4HG0413170	HORVU.MOREX.r3.3HG0303080	HORVU.MOREX.r3.2HG0181040	HORVU.MOREX.r3.2HG0161060
HORVU.MOREX.r3.1HG0017370	HORVU.MOREX.r3.7HG0670080	HORVU.MOREX.r3.6HG0549960	HORVU.MOREX.r3.4HG0413180	HORVU.MOREX.r3.3HG0303100	HORVU.MOREX.r3.2HG0181050	HORVU.MOREX.r3.2HG0161120
HORVU.MOREX.r3.1HG0017410	HORVU.MOREX.r3.7HG0670110	HORVU.MOREX.r3.6HG0549970	HORVU.MOREX.r3.4HG0413190	HORVU.MOREX.r3.3HG0303120	HORVU.MOREX.r3.2HG0181060	HORVU.MOREX.r3.2HG0161130
HORVU.MOREX.r3.1HG0017420	HORVU.MOREX.r3.7HG0670120	HORVU.MOREX.r3.6HG0549980	HORVU.MOREX.r3.4HG0413220	HORVU.MOREX.r3.3HG0303130	HORVU.MOREX.r3.2HG0181100	HORVU.MOREX.r3.2HG0161150
HORVU.MOREX.r3.1HG0017430	HORVU.MOREX.r3.7HG0670130	HORVU.MOREX.r3.6HG0549990	HORVU.MOREX.r3.4HG0413230	HORVU.MOREX.r3.3HG0303140	HORVU.MOREX.r3.2HG0181110	HORVU.MOREX.r3.2HG0161160
HORVU.MOREX.r3.1HG0017440	HORVU.MOREX.r3.7HG0670160	HORVU.MOREX.r3.6HG0550000	HORVU.MOREX.r3.4HG0413260	HORVU.MOREX.r3.3HG0303150	HORVU.MOREX.r3.2HG0181130	HORVU.MOREX.r3.2HG0161210
HORVU.MOREX.r3.1HG0017460	HORVU.MOREX.r3.7HG0670170	HORVU.MOREX.r3.6HG0550040	HORVU.MOREX.r3.4HG0413270	HORVU.MOREX.r3.3HG0303160	HORVU.MOREX.r3.2HG0181150	HORVU.MOREX.r3.2HG0161220
HORVU.MOREX.r3.1HG0017480	HORVU.MOREX.r3.7HG0670200	HORVU.MOREX.r3.6HG0550050	HORVU.MOREX.r3.4HG0413290	HORVU.MOREX.r3.3HG0303170	HORVU.MOREX.r3.2HG0181160	HORVU.MOREX.r3.2HG0161240
HORVU.MOREX.r3.1HG0017520	HORVU.MOREX.r3.7HG0670230	HORVU.MOREX.r3.6HG0550060	HORVU.MOREX.r3.4HG0413310	HORVU.MOREX.r3.3HG0303180	HORVU.MOREX.r3.2HG0181170	HORVU.MOREX.r3.2HG0161250
HORVU.MOREX.r3.1HG0017530	HORVU.MOREX.r3.7HG0670240	HORVU.MOREX.r3.6HG0550070	HORVU.MOREX.r3.4HG0413320	HORVU.MOREX.r3.3HG0303190	HORVU.MOREX.r3.2HG0181240	HORVU.MOREX.r3.2HG0161270
HORVU.MOREX.r3.1HG0017560	HORVU.MOREX.r3.7HG0670290	HORVU.MOREX.r3.6HG0550080	HORVU.MOREX.r3.4HG0413330	HORVU.MOREX.r3.3HG0303210	HORVU.MOREX.r3.2HG0181250	HORVU.MOREX.r3.2HG0161280
HORVU.MOREX.r3.1HG0017580	HORVU.MOREX.r3.7HG0670320	HORVU.MOREX.r3.6HG0550190	HORVU.MOREX.r3.4HG0413340	HORVU.MOREX.r3.3HG0303220	HORVU.MOREX.r3.2HG0181290	HORVU.MOREX.r3.2HG0161290
HORVU.MOREX.r3.1HG0017620	HORVU.MOREX.r3.7HG0670350	HORVU.MOREX.r3.6HG0550230	HORVU.MOREX.r3.4HG0413350	HORVU.MOREX.r3.3HG0303230	HORVU.MOREX.r3.2HG0181310	HORVU.MOREX.r3.2HG0161310
HORVU.MOREX.r3.1HG0017630	HORVU.MOREX.r3.7HG0670360	HORVU.MOREX.r3.6HG0550250	HORVU.MOREX.r3.4HG0413360	HORVU.MOREX.r3.3HG0303240	HORVU.MOREX.r3.2HG0181330	HORVU.MOREX.r3.2HG0161340
HORVU.MOREX.r3.1HG0017660	HORVU.MOREX.r3.7HG0670370	HORVU.MOREX.r3.6HG0550260	HORVU.MOREX.r3.4HG0413370	HORVU.MOREX.r3.3HG0303250	HORVU.MOREX.r3.2HG0181350	HORVU.MOREX.r3.2HG0161380
HORVU.MOREX.r3.1HG0017670	HORVU.MOREX.r3.7HG0670400	HORVU.MOREX.r3.6HG0550270	HORVU.MOREX.r3.4HG0413390	HORVU.MOREX.r3.3HG0303270	HORVU.MOREX.r3.2HG0181370	HORVU.MOREX.r3.2HG0161390
HORVU.MOREX.r3.1HG0017680	HORVU.MOREX.r3.7HG0670410	HORVU.MOREX.r3.6HG0550280	HORVU.MOREX.r3.4HG0413400	HORVU.MOREX.r3.3HG0303290	HORVU.MOREX.r3.2HG0181380	HORVU.MOREX.r3.2HG0161410
HORVU.MOREX.r3.1HG0017700	HORVU.MOREX.r3.7HG0670450	HORVU.MOREX.r3.6HG0550300	HORVU.MOREX.r3.4HG0413410	HORVU.MOREX.r3.3HG0303300	HORVU.MOREX.r3.2HG0181390	HORVU.MOREX.r3.2HG0161440
HORVU.MOREX.r3.1HG0017720	HORVU.MOREX.r3.7HG0670480	HORVU.MOREX.r3.6HG0550310	HORVU.MOREX.r3.4HG0413420	HORVU.MOREX.r3.3HG0303310	HORVU.MOREX.r3.2HG0181410	HORVU.MOREX.r3.2HG0161450
HORVU.MOREX.r3.1HG0017730	HORVU.MOREX.r3.7HG0670490	HORVU.MOREX.r3.6HG0550320	HORVU.MOREX.r3.4HG0413440	HORVU.MOREX.r3.3HG0303320	HORVU.MOREX.r3.2HG0181460	HORVU.MOREX.r3.2HG0161500
HORVU.MOREX.r3.1HG0017750	HORVU.MOREX.r3.7HG0670510	HORVU.MOREX.r3.6HG0550330	HORVU.MOREX.r3.4HG0413460	HORVU.MOREX.r3.3HG0303330	HORVU.MOREX.r3.2HG0181470	HORVU.MOREX.r3.2HG0161510
HORVU.MOREX.r3.1HG0017760	HORVU.MOREX.r3.7HG0670520	HORVU.MOREX.r3.6HG0550340	HORVU.MOREX.r3.4HG0413470	HORVU.MOREX.r3.3HG0303340	HORVU.MOREX.r3.2HG0181480	HORVU.MOREX.r3.2HG0161580
HORVU.MOREX.r3.1HG0017770	HORVU.MOREX.r3.7HG0670560	HORVU.MOREX.r3.6HG0550350	HORVU.MOREX.r3.4HG0413480	HORVU.MOREX.r3.3HG0303350	HORVU.MOREX.r3.2HG0181490	HORVU.MOREX.r3.2HG0161630
HORVU.MOREX.r3.1HG0017780	HORVU.MOREX.r3.7HG0670580	HORVU.MOREX.r3.6HG0550360	HORVU.MOREX.r3.4HG0413490	HORVU.MOREX.r3.3HG0303360	HORVU.MOREX.r3.2HG0181510	HORVU.MOREX.r3.2HG0161670
HORVU.MOREX.r3.1HG0017790	HORVU.MOREX.r3.7HG0670600	HORVU.MOREX.r3.6HG0550380	HORVU.MOREX.r3.4HG0413510	HORVU.MOREX.r3.3HG0303380	HORVU.MOREX.r3.2HG0181520	HORVU.MOREX.r3.2HG0161700
HORVU.MOREX.r3.1HG0017820	HORVU.MOREX.r3.7HG0670660	HORVU.MOREX.r3.6HG0550390	HORVU.MOREX.r3.4HG0413520	HORVU.MOREX.r3.3HG0303390	HORVU.MOREX.r3.2HG0181530	HORVU.MOREX.r3.2HG0161720
HORVU.MOREX.r3.1HG0017870	HORVU.MOREX.r3.7HG0670670	HORVU.MOREX.r3.6HG0550410	HORVU.MOREX.r3.4HG0413540	HORVU.MOREX.r3.3HG0303410	HORVU.MOREX.r3.2HG0181540	HORVU.MOREX.r3.2HG0161780
HORVU.MOREX.r3.1HG0017880	HORVU.MOREX.r3.7HG0670680	HORVU.MOREX.r3.6HG0550420	HORVU.MOREX.r3.4HG0413550	HORVU.MOREX.r3.3HG0303420	HORVU.MOREX.r3.2HG0181550	HORVU.MOREX.r3.2HG0161790
HORVU.MOREX.r3.1HG0017890	HORVU.MOREX.r3.7HG0670690	HORVU.MOREX.r3.6HG0550440	HORVU.MOREX.r3.4HG0413560	HORVU.MOREX.r3.3HG0303430	HORVU.MOREX.r3.2HG0181570	HORVU.MOREX.r3.2HG0161820
HORVU.MOREX.r3.1HG0017900	HORVU.MOREX.r3.7HG0670720	HORVU.MOREX.r3.6HG0550450	HORVU.MOREX.r3.4HG0413580	HORVU.MOREX.r3.3HG0303500	HORVU.MOREX.r3.2HG0181610	HORVU.MOREX.r3.2HG0161860
HORVU.MOREX.r3.1HG0017920	HORVU.MOREX.r3.7HG0670730	HORVU.MOREX.r3.6HG0550470	HORVU.MOREX.r3.4HG0413590	HORVU.MOREX.r3.3HG0303530	HORVU.MOREX.r3.2HG0181620	HORVU.MOREX.r3.2HG0161880
HORVU.MOREX.r3.1HG0017930	HORVU.MOREX.r3.7HG0670770	HORVU.MOREX.r3.6HG0550480	HORVU.MOREX.r3.4HG0413600	HORVU.MOREX.r3.3HG0303540	HORVU.MOREX.r3.2HG0181640	HORVU.MOREX.r3.2HG0161990
HORVU.MOREX.r3.1HG0017940	HORVU.MOREX.r3.7HG0670790	HORVU.MOREX.r3.6HG0550500	HORVU.MOREX.r3.4HG0413610	HORVU.MOREX.r3.3HG0303550	HORVU.MOREX.r3.2HG0181650	HORVU.MOREX.r3.2HG0162000
HORVU.MOREX.r3.1HG0017960	HORVU.MOREX.r3.7HG0670800	HORVU.MOREX.r3.6HG0550520	HORVU.MOREX.r3.4HG0413620	HORVU.MOREX.r3.3HG0303590	HORVU.MOREX.r3.2HG0181660	HORVU.MOREX.r3.2HG0162010
HORVU.MOREX.r3.1HG0017980	HORVU.MOREX.r3.7HG0670830	HORVU.MOREX.r3.6HG0550530	HORVU.MOREX.r3.4HG0413630	HORVU.MOREX.r3.3HG0303600	HORVU.MOREX.r3.2HG0181680	HORVU.MOREX.r3.2HG0162030
HORVU.MOREX.r3.1HG0018000	HORVU.MOREX.r3.7HG0670900	HORVU.MOREX.r3.6HG0550550	HORVU.MOREX.r3.4HG0413640	HORVU.MOREX.r3.3HG0303660	HORVU.MOREX.r3.2HG0181690	HORVU.MOREX.r3.2HG0162040
HORVU.MOREX.r3.1HG0018050	HORVU.MOREX.r3.7HG0670910	HORVU.MOREX.r3.6HG0550560	HORVU.MOREX.r3.4HG0413650	HORVU.MOREX.r3.3HG0303670	HORVU.MOREX.r3.2HG0181700	HORVU.MOREX.r3.2HG0162070
HORVU.MOREX.r3.1HG0018110	HORVU.MOREX.r3.7HG0670920	HORVU.MOREX.r3.6HG0550570	HORVU.MOREX.r3.4HG0413660	HORVU.MOREX.r3.3HG0303680	HORVU.MOREX.r3.2HG0181760	HORVU.MOREX.r3.2HG0162300
HORVU.MOREX.r3.1HG0018130	HORVU.MOREX.r3.7HG0670950	HORVU.MOREX.r3.6HG0550630	HORVU.MOREX.r3.4HG0413680	HORVU.MOREX.r3.3HG0303690	HORVU.MOREX.r3.2HG0181770	HORVU.MOREX.r3.2HG0162320
HORVU.MOREX.r3.1HG0018150	HORVU.MOREX.r3.7HG0670970	HORVU.MOREX.r3.6HG0550650	HORVU.MOREX.r3.4HG0413690	HORVU.MOREX.r3.3HG0303700	HORVU.MOREX.r3.2HG0181800	HORVU.MOREX.r3.2HG0162340
HORVU.MOREX.r3.1HG0018160	HORVU.MOREX.r3.7HG0670980	HORVU.MOREX.r3.6HG0550670	HORVU.MOREX.r3.4HG0413710	HORVU.MOREX.r3.3HG0303710	HORVU.MOREX.r3.2HG0181840	HORVU.MOREX.r3.2HG0162350
HORVU.MOREX.r3.1HG0018170	HORVU.MOREX.r3.7HG0670990	HORVU.MOREX.r3.6HG0550690	HORVU.MOREX.r3.4HG0413720	HORVU.MOREX.r3.3HG0303730	HORVU.MOREX.r3.2HG0181870	HORVU.MOREX.r3.2HG0162380
HORVU.MOREX.r3.1HG0018190	HORVU.MOREX.r3.7HG0671010	HORVU.MOREX.r3.6HG0550700	HORVU.MOREX.r3.4HG0413730	HORVU.MOREX.r3.3HG0303750	HORVU.MOREX.r3.2HG0181880	HORVU.MOREX.r3.2HG0162410
HORVU.MOREX.r3.1HG0018200	HORVU.MOREX.r3.7HG0671070	HORVU.MOREX.r3.6HG0550730	HORVU.MOREX.r3.4HG0413740	HORVU.MOREX.r3.3HG0303760	HORVU.MOREX.r3.2HG0181900	HORVU.MOREX.r3.2HG0162520
HORVU.MOREX.r3.1HG0018210	HORVU.MOREX.r3.7HG0671150	HORVU.MOREX.r3.6HG0550740	HORVU.MOREX.r3.4HG0413750	HORVU.MOREX.r3.3HG0303790	HORVU.MOREX.r3.2HG0181910	HORVU.MOREX.r3.2HG0162560
HORVU.MOREX.r3.1HG0018240	HORVU.MOREX.r3.7HG0671160	HORVU.MOREX.r3.6HG0550760	HORVU.MOREX.r3.4HG0413760	HORVU.MOREX.r3.3HG0303800	HORVU.MOREX.r3.2HG0181940	HORVU.MOREX.r3.2HG0162570
HORVU.MOREX.r3.1HG0018250	HORVU.MOREX.r3.7HG0671170	HORVU.MOREX.r3.6HG0550770	HORVU.MOREX.r3.4HG0413770	HORVU.MOREX.r3.3HG0303810	HORVU.MOREX.r3.2HG0181960	HORVU.MOREX.r3.2HG0162580
HORVU.MOREX.r3.1HG0018260	HORVU.MOREX.r3.7HG0671210	HORVU.MOREX.r3.6HG0550780	HORVU.MOREX.r3.4HG0413780	HORVU.MOREX.r3.3HG0303820	HORVU.MOREX.r3.2HG0181970	HORVU.MOREX.r3.2HG0162600
HORVU.MOREX.r3.1HG0018270	HORVU.MOREX.r3.7HG0671220	HORVU.MOREX.r3.6HG0550790	HORVU.MOREX.r3.4HG0413790	HORVU.MOREX.r3.3HG0303830	HORVU.MOREX.r3.2HG0182000	HORVU.MOREX.r3.2HG0162620
HORVU.MOREX.r3.1HG0018350	HORVU.MOREX.r3.7HG0671290	HORVU.MOREX.r3.6HG0550800	HORVU.MOREX.r3.4HG0413800	HORVU.MOREX.r3.3HG0303840	HORVU.MOREX.r3.2HG0182010	HORVU.MOREX.r3.2HG0162640
HORVU.MOREX.r3.1HG0018360	HORVU.MOREX.r3.7HG0671300	HORVU.MOREX.r3.6HG0550810	HORVU.MOREX.r3.4HG0413850	HORVU.MOREX.r3.3HG0303880	HORVU.MOREX.r3.2HG0182020	HORVU.MOREX.r3.2HG0162660
HORVU.MOREX.r3.1HG0018390	HORVU.MOREX.r3.7HG0671310	HORVU.MOREX.r3.6HG0550820	HORVU.MOREX.r3.4HG0413890	HORVU.MOREX.r3.3HG0303890	HORVU.MOREX.r3.2HG0182030	HORVU.MOREX.r3.2HG0162680
HORVU.MOREX.r3.1HG0018400	HORVU.MOREX.r3.7HG0671320	HORVU.MOREX.r3.6HG0550830	HORVU.MOREX.r3.4HG0413910	HORVU.MOREX.r3.3HG0303900	HORVU.MOREX.r3.2HG0182060	HORVU.MOREX.r3.2HG0162690
HORVU.MOREX.r3.1HG0018410	HORVU.MOREX.r3.7HG0671350	HORVU.MOREX.r3.6HG0550840	HORVU.MOREX.r3.4HG0413950	HORVU.MOREX.r3.3HG0303910	HORVU.MOREX.r3.2HG0182080	HORVU.MOREX.r3.2HG0162750
HORVU.MOREX.r3.1HG0018420	HORVU.MOREX.r3.7HG0671360	HORVU.MOREX.r3.6HG0550850	HORVU.MOREX.r3.4HG0413960	HORVU.MOREX.r3.3HG0303920	HORVU.MOREX.r3.2HG0182090	HORVU.MOREX.r3.2HG0162790
HORVU.MOREX.r3.1HG0018430	HORVU.MOREX.r3.7HG0671370	HORVU.MOREX.r3.6HG0550880	HORVU.MOREX.r3.4HG0413970	HORVU.MOREX.r3.3HG0303960	HORVU.MOREX.r3.2HG0182150	HORVU.MOREX.r3.2HG0162800
HORVU.MOREX.r3.1HG0018480	HORVU.MOREX.r3.7HG0671380	HORVU.MOREX.r3.6HG0550890	HORVU.MOREX.r3.4HG0413990	HORVU.MOREX.r3.3HG0303970	HORVU.MOREX.r3.2HG0182190	HORVU.MOREX.r3.2HG0162910
HORVU.MOREX.r3.1HG0018490	HORVU.MOREX.r3.7HG0671400	HORVU.MOREX.r3.6HG0550920	HORVU.MOREX.r3.4HG0414000	HORVU.MOREX.r3.3HG0303980	HORVU.MOREX.r3.2HG0182210	HORVU.MOREX.r3.2HG0162930
HORVU.MOREX.r3.1HG0018510	HORVU.MOREX.r3.7HG0671410	HORVU.MOREX.r3.6HG0550930	HORVU.MOREX.r3.4HG0414010	HORVU.MOREX.r3.3HG0303990	HORVU.MOREX.r3.2HG0182220	HORVU.MOREX.r3.2HG0162940
HORVU.MOREX.r3.1HG0018570	HORVU.MOREX.r3.7HG0671420	HORVU.MOREX.r3.6HG0550940	HORVU.MOREX.r3.4HG0414030	HORVU.MOREX.r3.3HG0304010	HORVU.MOREX.r3.2HG0182280	HORVU.MOREX.r3.2HG0162950
HORVU.MOREX.r3.1HG0018590	HORVU.MOREX.r3.7HG0671430	HORVU.MOREX.r3.6HG0550950	HORVU.MOREX.r3.4HG0414080	HORVU.MOREX.r3.3HG0304020	HORVU.MOREX.r3.2HG0182320	HORVU.MOREX.r3.2HG0163020
HORVU.MOREX.r3.1HG0018610	HORVU.MOREX.r3.7HG0671440	HORVU.MOREX.r3.6HG0550960	HORVU.MOREX.r3.4HG0414100	HORVU.MOREX.r3.3HG0304030	HORVU.MOREX.r3.2HG0182330	HORVU.MOREX.r3.2HG0163050
HORVU.MOREX.r3.1HG0018620	HORVU.MOREX.r3.7HG0671460	HORVU.MOREX.r3.6HG0550980	HORVU.MOREX.r3.4HG0414130	HORVU.MOREX.r3.3HG0304070	HORVU.MOREX.r3.2HG0182350	HORVU.MOREX.r3.2HG0163070
HORVU.MOREX.r3.1HG0018630	HORVU.MOREX.r3.7HG0671470	HORVU.MOREX.r3.6HG0550990	HORVU.MOREX.r3.4HG0414140	HORVU.MOREX.r3.3HG0304080	HORVU.MOREX.r3.2HG0182370	HORVU.MOREX.r3.2HG0163090
HORVU.MOREX.r3.1HG0018640	HORVU.MOREX.r3.7HG0671490	HORVU.MOREX.r3.6HG0551000	HORVU.MOREX.r3.4HG0414150	HORVU.MOREX.r3.3HG0304090	HORVU.MOREX.r3.2HG0182380	HORVU.MOREX.r3.2HG0163110
HORVU.MOREX.r3.1HG0018730	HORVU.MOREX.r3.7HG0671510	HORVU.MOREX.r3.6HG0551010	HORVU.MOREX.r3.4HG0414170	HORVU.MOREX.r3.3HG0304110	HORVU.MOREX.r3.2HG0182390	HORVU.MOREX.r3.2HG0163200
HORVU.MOREX.r3.1HG0018760	HORVU.MOREX.r3.7HG0671520	HORVU.MOREX.r3.6HG0551050	HORVU.MOREX.r3.4HG0414180	HORVU.MOREX.r3.3HG0304120	HORVU.MOREX.r3.2HG0182400	HORVU.MOREX.r3.2HG0163220
HORVU.MOREX.r3.1HG0018770	HORVU.MOREX.r3.7HG0671530	HORVU.MOREX.r3.6HG0551080	HORVU.MOREX.r3.4HG0414190	HORVU.MOREX.r3.3HG0304130	HORVU.MOREX.r3.2HG0182420	HORVU.MOREX.r3.2HG0163240
HORVU.MOREX.r3.1HG0018780	HORVU.MOREX.r3.7HG0671540	HORVU.MOREX.r3.6HG0551130	HORVU.MOREX.r3.4HG0414200	HORVU.MOREX.r3.3HG0304180	HORVU.MOREX.r3.2HG0182430	HORVU.MOREX.r3.2HG0163250
HORVU.MOREX.r3.1HG0018790	HORVU.MOREX.r3.7HG0671550	HORVU.MOREX.r3.6HG0551140	HORVU.MOREX.r3.4HG0414210	HORVU.MOREX.r3.3HG0304190	HORVU.MOREX.r3.2HG0182440	HORVU.MOREX.r3.2HG0163290
HORVU.MOREX.r3.1HG0018800	HORVU.MOREX.r3.7HG0671560	HORVU.MOREX.r3.6HG0551170	HORVU.MOREX.r3.4HG0414220	HORVU.MOREX.r3.3HG0304200	HORVU.MOREX.r3.2HG0182450	HORVU.MOREX.r3.2HG0163320
HORVU.MOREX.r3.1HG0018810	HORVU.MOREX.r3.7HG0671580	HORVU.MOREX.r3.6HG0551180	HORVU.MOREX.r3.4HG0414230	HORVU.MOREX.r3.3HG0304210	HORVU.MOREX.r3.2HG0182460	HORVU.MOREX.r3.2HG0163380
HORVU.MOREX.r3.1HG0018820	HORVU.MOREX.r3.7HG0671590	HORVU.MOREX.r3.6HG0551190	HORVU.MOREX.r3.4HG0414260	HORVU.MOREX.r3.3HG0304220	HORVU.MOREX.r3.2HG0182470	HORVU.MOREX.r3.2HG0163390
HORVU.MOREX.r3.1HG0018830	HORVU.MOREX.r3.7HG0671600	HORVU.MOREX.r3.6HG0551220	HORVU.MOREX.r3.4HG0414290	HORVU.MOREX.r3.3HG0304230	HORVU.MOREX.r3.2HG0182550	HORVU.MOREX.r3.2HG0163410
HORVU.MOREX.r3.1HG0018930	HORVU.MOREX.r3.7HG0671700	HORVU.MOREX.r3.6HG0551230	HORVU.MOREX.r3.4HG0414300	HORVU.MOREX.r3.3HG0304260	HORVU.MOREX.r3.2HG0182570	HORVU.MOREX.r3.2HG0163460
HORVU.MOREX.r3.1HG0018940	HORVU.MOREX.r3.7HG0671710	HORVU.MOREX.r3.6HG0551240	HORVU.MOREX.r3.4HG0414310	HORVU.MOREX.r3.3HG0304270	HORVU.MOREX.r3.2HG0182620	HORVU.MOREX.r3.2HG0163510
HORVU.MOREX.r3.1HG0018950	HORVU.MOREX.r3.7HG0671720	HORVU.MOREX.r3.6HG0551260	HORVU.MOREX.r3.4HG0414320	HORVU.MOREX.r3.3HG0304280	HORVU.MOREX.r3.2HG0182630	HORVU.MOREX.r3.2HG0163520
HORVU.MOREX.r3.1HG0019040	HORVU.MOREX.r3.7HG0671730	HORVU.MOREX.r3.6HG0551300	HORVU.MOREX.r3.4HG0414340	HORVU.MOREX.r3.3HG0304300	HORVU.MOREX.r3.2HG0182650	HORVU.MOREX.r3.2HG0163560
HORVU.MOREX.r3.1HG0019050	HORVU.MOREX.r3.7HG0671750	HORVU.MOREX.r3.6HG0551320	HORVU.MOREX.r3.4HG0414350	HORVU.MOREX.r3.3HG0304310	HORVU.MOREX.r3.2HG0182690	HORVU.MOREX.r3.2HG0163580
HORVU.MOREX.r3.1HG0019060	HORVU.MOREX.r3.7HG0671800	HORVU.MOREX.r3.6HG0551350	HORVU.MOREX.r3.4HG0414370	HORVU.MOREX.r3.3HG0304320	HORVU.MOREX.r3.2HG0182730	HORVU.MOREX.r3.2HG0163590
HORVU.MOREX.r3.1HG0019070	HORVU.MOREX.r3.7HG0671810	HORVU.MOREX.r3.6HG0551380	HORVU.MOREX.r3.4HG0414380	HORVU.MOREX.r3.3HG0304330	HORVU.MOREX.r3.2HG0182740	HORVU.MOREX.r3.2HG0163640
HORVU.MOREX.r3.1HG0019100	HORVU.MOREX.r3.7HG0671820	HORVU.MOREX.r3.6HG0551400	HORVU.MOREX.r3.4HG0414400	HORVU.MOREX.r3.3HG0304340	HORVU.MOREX.r3.2HG0182770	HORVU.MOREX.r3.2HG0163690
HORVU.MOREX.r3.1HG0019140	HORVU.MOREX.r3.7HG0671880	HORVU.MOREX.r3.6HG0551430	HORVU.MOREX.r3.4HG0414410	HORVU.MOREX.r3.3HG0304360	HORVU.MOREX.r3.2HG0182800	HORVU.MOREX.r3.2HG0163740
HORVU.MOREX.r3.1HG0019150	HORVU.MOREX.r3.7HG0671890	HORVU.MOREX.r3.6HG0551440	HORVU.MOREX.r3.4HG0414430	HORVU.MOREX.r3.3HG0304370	HORVU.MOREX.r3.2HG0182810	HORVU.MOREX.r3.2HG0163750
HORVU.MOREX.r3.1HG0019160	HORVU.MOREX.r3.7HG0671910	HORVU.MOREX.r3.6HG0551460	HORVU.MOREX.r3.4HG0414440	HORVU.MOREX.r3.3HG0304380	HORVU.MOREX.r3.2HG0182820	HORVU.MOREX.r3.2HG0163760
HORVU.MOREX.r3.1HG0019170	HORVU.MOREX.r3.7HG0672010	HORVU.MOREX.r3.6HG0551480	HORVU.MOREX.r3.4HG0414450	HORVU.MOREX.r3.3HG0304390	HORVU.MOREX.r3.2HG0182840	HORVU.MOREX.r3.2HG0163780
HORVU.MOREX.r3.1HG0019220	HORVU.MOREX.r3.7HG0672040	HORVU.MOREX.r3.6HG0551500	HORVU.MOREX.r3.4HG0414460	HORVU.MOREX.r3.3HG0304410	HORVU.MOREX.r3.2HG0182850	HORVU.MOREX.r3.2HG0163850
HORVU.MOREX.r3.1HG0019230	HORVU.MOREX.r3.7HG0672060	HORVU.MOREX.r3.6HG0551510	HORVU.MOREX.r3.4HG0414480	HORVU.MOREX.r3.3HG0304420	HORVU.MOREX.r3.2HG0182860	HORVU.MOREX.r3.2HG0163860
HORVU.MOREX.r3.1HG0019240	HORVU.MOREX.r3.7HG0672140	HORVU.MOREX.r3.6HG0551520	HORVU.MOREX.r3.4HG0414490	HORVU.MOREX.r3.3HG0304430	HORVU.MOREX.r3.2HG0182880	HORVU.MOREX.r3.2HG0163880
HORVU.MOREX.r3.1HG0019260	HORVU.MOREX.r3.7HG0672180	HORVU.MOREX.r3.6HG0551530	HORVU.MOREX.r3.4HG0414500	HORVU.MOREX.r3.3HG0304480	HORVU.MOREX.r3.2HG0182910	HORVU.MOREX.r3.2HG0163890
HORVU.MOREX.r3.1HG0019270	HORVU.MOREX.r3.7HG0672190	HORVU.MOREX.r3.6HG0551560	HORVU.MOREX.r3.4HG0414510	HORVU.MOREX.r3.3HG0304490	HORVU.MOREX.r3.2HG0182920	HORVU.MOREX.r3.2HG0163950
HORVU.MOREX.r3.1HG0019320	HORVU.MOREX.r3.7HG0672210	HORVU.MOREX.r3.6HG0551570	HORVU.MOREX.r3.4HG0414520	HORVU.MOREX.r3.3HG0304500	HORVU.MOREX.r3.2HG0182990	HORVU.MOREX.r3.2HG0163960
HORVU.MOREX.r3.1HG0019330	HORVU.MOREX.r3.7HG0672230	HORVU.MOREX.r3.6HG0551600	HORVU.MOREX.r3.4HG0414530	HORVU.MOREX.r3.3HG0304510	HORVU.MOREX.r3.2HG0183010	HORVU.MOREX.r3.2HG0164020
HORVU.MOREX.r3.1HG0019340	HORVU.MOREX.r3.7HG0672240	HORVU.MOREX.r3.6HG0551620	HORVU.MOREX.r3.4HG0414540	HORVU.MOREX.r3.3HG0304540	HORVU.MOREX.r3.2HG0183020	HORVU.MOREX.r3.2HG0164080
HORVU.MOREX.r3.1HG0019350	HORVU.MOREX.r3.7HG0672260	HORVU.MOREX.r3.6HG0551650	HORVU.MOREX.r3.4HG0414550	HORVU.MOREX.r3.3HG0304550	HORVU.MOREX.r3.2HG0183040	HORVU.MOREX.r3.2HG0164090
HORVU.MOREX.r3.1HG0019360	HORVU.MOREX.r3.7HG0672400	HORVU.MOREX.r3.6HG0551660	HORVU.MOREX.r3.4HG0414560	HORVU.MOREX.r3.3HG0304560	HORVU.MOREX.r3.2HG0183060	HORVU.MOREX.r3.2HG0164110
HORVU.MOREX.r3.1HG0019380	HORVU.MOREX.r3.7HG0672430	HORVU.MOREX.r3.6HG0551670	HORVU.MOREX.r3.4HG0414590	HORVU.MOREX.r3.3HG0304600	HORVU.MOREX.r3.2HG0183080	HORVU.MOREX.r3.2HG0164140
HORVU.MOREX.r3.1HG0019390	HORVU.MOREX.r3.7HG0672440	HORVU.MOREX.r3.6HG0551680	HORVU.MOREX.r3.4HG0414600	HORVU.MOREX.r3.3HG0304610	HORVU.MOREX.r3.2HG0183140	HORVU.MOREX.r3.2HG0164150
HORVU.MOREX.r3.1HG0019400	HORVU.MOREX.r3.7HG0672450	HORVU.MOREX.r3.6HG0551690	HORVU.MOREX.r3.4HG0414630	HORVU.MOREX.r3.3HG0304620	HORVU.MOREX.r3.2HG0183150	HORVU.MOREX.r3.2HG0164160
HORVU.MOREX.r3.1HG0019410	HORVU.MOREX.r3.7HG0672470	HORVU.MOREX.r3.6HG0551710	HORVU.MOREX.r3.4HG0414640	HORVU.MOREX.r3.3HG0304630	HORVU.MOREX.r3.2HG0183170	HORVU.MOREX.r3.2HG0164180
HORVU.MOREX.r3.1HG0019420	HORVU.MOREX.r3.7HG0672530	HORVU.MOREX.r3.6HG0551720	HORVU.MOREX.r3.4HG0414650	HORVU.MOREX.r3.3HG0304640	HORVU.MOREX.r3.2HG0183220	HORVU.MOREX.r3.2HG0164200
HORVU.MOREX.r3.1HG0019550	HORVU.MOREX.r3.7HG0672540	HORVU.MOREX.r3.6HG0551730	HORVU.MOREX.r3.4HG0414660	HORVU.MOREX.r3.3HG0304650	HORVU.MOREX.r3.2HG0183240	HORVU.MOREX.r3.3HG0285240
HORVU.MOREX.r3.1HG0019580	HORVU.MOREX.r3.7HG0672550	HORVU.MOREX.r3.6HG0551740	HORVU.MOREX.r3.4HG0414670	HORVU.MOREX.r3.3HG0304660	HORVU.MOREX.r3.2HG0183300	HORVU.MOREX.r3.3HG0285260
HORVU.MOREX.r3.1HG0019650	HORVU.MOREX.r3.7HG0672590	HORVU.MOREX.r3.6HG0551750	HORVU.MOREX.r3.4HG0414700	HORVU.MOREX.r3.3HG0304680	HORVU.MOREX.r3.2HG0183310	HORVU.MOREX.r3.3HG0285270
HORVU.MOREX.r3.1HG0019660	HORVU.MOREX.r3.7HG0672600	HORVU.MOREX.r3.6HG0551770	HORVU.MOREX.r3.4HG0414710	HORVU.MOREX.r3.3HG0304710	HORVU.MOREX.r3.2HG0183320	HORVU.MOREX.r3.3HG0285280
HORVU.MOREX.r3.1HG0019680	HORVU.MOREX.r3.7HG0672620	HORVU.MOREX.r3.6HG0551840	HORVU.MOREX.r3.4HG0414720	HORVU.MOREX.r3.3HG0304720	HORVU.MOREX.r3.2HG0183330	HORVU.MOREX.r3.3HG0285290
HORVU.MOREX.r3.1HG0019690	HORVU.MOREX.r3.7HG0672660	HORVU.MOREX.r3.6HG0551860	HORVU.MOREX.r3.4HG0414780	HORVU.MOREX.r3.3HG0304730	HORVU.MOREX.r3.2HG0183350	HORVU.MOREX.r3.3HG0285310
HORVU.MOREX.r3.1HG0019730	HORVU.MOREX.r3.7HG0672670	HORVU.MOREX.r3.6HG0551870	HORVU.MOREX.r3.4HG0414790	HORVU.MOREX.r3.3HG0304740	HORVU.MOREX.r3.2HG0183360	HORVU.MOREX.r3.3HG0285320
HORVU.MOREX.r3.1HG0019840	HORVU.MOREX.r3.7HG0672690	HORVU.MOREX.r3.6HG0551940	HORVU.MOREX.r3.4HG0414810	HORVU.MOREX.r3.3HG0304770	HORVU.MOREX.r3.2HG0183370	HORVU.MOREX.r3.3HG0285340
HORVU.MOREX.r3.1HG0019870	HORVU.MOREX.r3.7HG0672700	HORVU.MOREX.r3.6HG0551950	HORVU.MOREX.r3.4HG0414820	HORVU.MOREX.r3.3HG0304780	HORVU.MOREX.r3.2HG0183380	HORVU.MOREX.r3.3HG0285350
HORVU.MOREX.r3.1HG0019920	HORVU.MOREX.r3.7HG0672710	HORVU.MOREX.r3.6HG0551960	HORVU.MOREX.r3.4HG0414830	HORVU.MOREX.r3.3HG0304800	HORVU.MOREX.r3.2HG0183390	HORVU.MOREX.r3.3HG0285400
HORVU.MOREX.r3.1HG0019930	HORVU.MOREX.r3.7HG0672730	HORVU.MOREX.r3.6HG0551980	HORVU.MOREX.r3.4HG0414850	HORVU.MOREX.r3.3HG0304810	HORVU.MOREX.r3.2HG0183400	HORVU.MOREX.r3.3HG0285420
HORVU.MOREX.r3.1HG0019940	HORVU.MOREX.r3.7HG0672740	HORVU.MOREX.r3.6HG0551990	HORVU.MOREX.r3.4HG0414880	HORVU.MOREX.r3.3HG0304830	HORVU.MOREX.r3.2HG0183420	HORVU.MOREX.r3.3HG0285440
HORVU.MOREX.r3.1HG0019950	HORVU.MOREX.r3.7HG0672770	HORVU.MOREX.r3.6HG0552010	HORVU.MOREX.r3.4HG0414900	HORVU.MOREX.r3.3HG0304880	HORVU.MOREX.r3.2HG0183430	HORVU.MOREX.r3.3HG0285450
HORVU.MOREX.r3.1HG0019960	HORVU.MOREX.r3.7HG0672810	HORVU.MOREX.r3.6HG0552020	HORVU.MOREX.r3.4HG0414910	HORVU.MOREX.r3.3HG0304890	HORVU.MOREX.r3.2HG0183440	HORVU.MOREX.r3.3HG0285460
HORVU.MOREX.r3.1HG0019970	HORVU.MOREX.r3.7HG0672850	HORVU.MOREX.r3.6HG0552030	HORVU.MOREX.r3.4HG0414920	HORVU.MOREX.r3.3HG0304930	HORVU.MOREX.r3.2HG0183450	HORVU.MOREX.r3.3HG0285470
HORVU.MOREX.r3.1HG0019980	HORVU.MOREX.r3.7HG0672880	HORVU.MOREX.r3.6HG0552040	HORVU.MOREX.r3.4HG0414930	HORVU.MOREX.r3.3HG0304940	HORVU.MOREX.r3.2HG0183460	HORVU.MOREX.r3.3HG0285480
HORVU.MOREX.r3.1HG0019990	HORVU.MOREX.r3.7HG0672890	HORVU.MOREX.r3.6HG0552090	HORVU.MOREX.r3.4HG0414940	HORVU.MOREX.r3.3HG0304950	HORVU.MOREX.r3.2HG0183470	HORVU.MOREX.r3.3HG0285490
HORVU.MOREX.r3.1HG0020010	HORVU.MOREX.r3.7HG0672900	HORVU.MOREX.r3.6HG0552110	HORVU.MOREX.r3.4HG0414950	HORVU.MOREX.r3.3HG0304970	HORVU.MOREX.r3.2HG0183520	HORVU.MOREX.r3.3HG0285510
HORVU.MOREX.r3.1HG0020170	HORVU.MOREX.r3.7HG0672910	HORVU.MOREX.r3.6HG0552120	HORVU.MOREX.r3.4HG0414960	HORVU.MOREX.r3.3HG0304980	HORVU.MOREX.r3.2HG0183530	HORVU.MOREX.r3.3HG0285520
HORVU.MOREX.r3.1HG0020180	HORVU.MOREX.r3.7HG0672930	HORVU.MOREX.r3.6HG0552160	HORVU.MOREX.r3.4HG0414970	HORVU.MOREX.r3.3HG0305030	HORVU.MOREX.r3.2HG0183550	HORVU.MOREX.r3.3HG0285530
HORVU.MOREX.r3.1HG0020190	HORVU.MOREX.r3.7HG0672960	HORVU.MOREX.r3.6HG0552170	HORVU.MOREX.r3.4HG0415030	HORVU.MOREX.r3.3HG0305050	HORVU.MOREX.r3.2HG0183600	HORVU.MOREX.r3.3HG0285540
HORVU.MOREX.r3.1HG0020210	HORVU.MOREX.r3.7HG0672970	HORVU.MOREX.r3.6HG0552180	HORVU.MOREX.r3.4HG0415040	HORVU.MOREX.r3.3HG0305060	HORVU.MOREX.r3.2HG0183610	HORVU.MOREX.r3.3HG0285550
HORVU.MOREX.r3.1HG0020220	HORVU.MOREX.r3.7HG0673000	HORVU.MOREX.r3.6HG0552190	HORVU.MOREX.r3.4HG0415050	HORVU.MOREX.r3.3HG0305070	HORVU.MOREX.r3.2HG0183620	HORVU.MOREX.r3.3HG0285570
HORVU.MOREX.r3.1HG0020250	HORVU.MOREX.r3.7HG0673050	HORVU.MOREX.r3.6HG0552200	HORVU.MOREX.r3.4HG0415060	HORVU.MOREX.r3.3HG0305080	HORVU.MOREX.r3.2HG0183630	HORVU.MOREX.r3.3HG0285620
HORVU.MOREX.r3.1HG0020260	HORVU.MOREX.r3.7HG0673070	HORVU.MOREX.r3.6HG0552210	HORVU.MOREX.r3.4HG0415090	HORVU.MOREX.r3.3HG0305100	HORVU.MOREX.r3.2HG0183640	HORVU.MOREX.r3.3HG0285650
HORVU.MOREX.r3.1HG0020270	HORVU.MOREX.r3.7HG0673150	HORVU.MOREX.r3.6HG0552220	HORVU.MOREX.r3.4HG0415100	HORVU.MOREX.r3.3HG0305120	HORVU.MOREX.r3.2HG0183650	HORVU.MOREX.r3.3HG0285660
HORVU.MOREX.r3.1HG0020280	HORVU.MOREX.r3.7HG0673160	HORVU.MOREX.r3.6HG0552230	HORVU.MOREX.r3.4HG0415110	HORVU.MOREX.r3.3HG0305140	HORVU.MOREX.r3.2HG0183660	HORVU.MOREX.r3.3HG0285680
HORVU.MOREX.r3.1HG0020290	HORVU.MOREX.r3.7HG0673210	HORVU.MOREX.r3.6HG0552250	HORVU.MOREX.r3.4HG0415120	HORVU.MOREX.r3.3HG0305150	HORVU.MOREX.r3.2HG0183670	HORVU.MOREX.r3.3HG0285700
HORVU.MOREX.r3.1HG0020300	HORVU.MOREX.r3.7HG0673260	HORVU.MOREX.r3.6HG0552260	HORVU.MOREX.r3.4HG0415130	HORVU.MOREX.r3.3HG0305180	HORVU.MOREX.r3.2HG0183710	HORVU.MOREX.r3.3HG0285710
HORVU.MOREX.r3.1HG0020310	HORVU.MOREX.r3.7HG0673270	HORVU.MOREX.r3.6HG0552290	HORVU.MOREX.r3.4HG0415160	HORVU.MOREX.r3.3HG0305190	HORVU.MOREX.r3.2HG0183720	HORVU.MOREX.r3.3HG0285730
HORVU.MOREX.r3.1HG0020320	HORVU.MOREX.r3.7HG0673280	HORVU.MOREX.r3.6HG0552410	HORVU.MOREX.r3.4HG0415170	HORVU.MOREX.r3.3HG0305200	HORVU.MOREX.r3.2HG0183730	HORVU.MOREX.r3.3HG0285740
HORVU.MOREX.r3.1HG0020390	HORVU.MOREX.r3.7HG0673290	HORVU.MOREX.r3.6HG0552460	HORVU.MOREX.r3.4HG0415180	HORVU.MOREX.r3.3HG0305210	HORVU.MOREX.r3.2HG0183740	HORVU.MOREX.r3.3HG0285770
HORVU.MOREX.r3.1HG0020430	HORVU.MOREX.r3.7HG0673300	HORVU.MOREX.r3.6HG0552470	HORVU.MOREX.r3.4HG0415230	HORVU.MOREX.r3.3HG0305220	HORVU.MOREX.r3.2HG0183750	HORVU.MOREX.r3.2HG0128810
HORVU.MOREX.r3.1HG0020440	HORVU.MOREX.r3.7HG0673330	HORVU.MOREX.r3.6HG0552480	HORVU.MOREX.r3.4HG0415240	HORVU.MOREX.r3.3HG0305230	HORVU.MOREX.r3.2HG0183770	HORVU.MOREX.r3.2HG0128820
HORVU.MOREX.r3.1HG0020450	HORVU.MOREX.r3.7HG0673370	HORVU.MOREX.r3.6HG0552520	HORVU.MOREX.r3.4HG0415250	HORVU.MOREX.r3.3HG0305240	HORVU.MOREX.r3.2HG0183780	HORVU.MOREX.r3.2HG0128830
HORVU.MOREX.r3.1HG0020460	HORVU.MOREX.r3.7HG0673430	HORVU.MOREX.r3.6HG0552530	HORVU.MOREX.r3.4HG0415260	HORVU.MOREX.r3.3HG0305270	HORVU.MOREX.r3.2HG0183810	HORVU.MOREX.r3.2HG0128840
HORVU.MOREX.r3.1HG0020520	HORVU.MOREX.r3.7HG0673500	HORVU.MOREX.r3.6HG0552540	HORVU.MOREX.r3.4HG0415290	HORVU.MOREX.r3.3HG0305280	HORVU.MOREX.r3.2HG0183820	HORVU.MOREX.r3.2HG0128850
HORVU.MOREX.r3.1HG0020590	HORVU.MOREX.r3.7HG0673520	HORVU.MOREX.r3.6HG0552550	HORVU.MOREX.r3.4HG0415300	HORVU.MOREX.r3.3HG0305290	HORVU.MOREX.r3.2HG0183830	HORVU.MOREX.r3.2HG0121500
HORVU.MOREX.r3.1HG0020650	HORVU.MOREX.r3.7HG0673530	HORVU.MOREX.r3.6HG0552570	HORVU.MOREX.r3.4HG0415320	HORVU.MOREX.r3.3HG0305340	HORVU.MOREX.r3.2HG0183850	HORVU.MOREX.r3.2HG0121520
HORVU.MOREX.r3.1HG0020680	HORVU.MOREX.r3.7HG0673540	HORVU.MOREX.r3.6HG0552580	HORVU.MOREX.r3.4HG0415340	HORVU.MOREX.r3.3HG0305350	HORVU.MOREX.r3.2HG0183860	HORVU.MOREX.r3.2HG0121530
HORVU.MOREX.r3.1HG0020730	HORVU.MOREX.r3.7HG0673550	HORVU.MOREX.r3.6HG0552590	HORVU.MOREX.r3.4HG0415350	HORVU.MOREX.r3.3HG0305360	HORVU.MOREX.r3.2HG0183870	HORVU.MOREX.r3.2HG0121540
HORVU.MOREX.r3.1HG0020760	HORVU.MOREX.r3.7HG0673560	HORVU.MOREX.r3.6HG0552600	HORVU.MOREX.r3.4HG0415360	HORVU.MOREX.r3.3HG0305370	HORVU.MOREX.r3.2HG0183880	HORVU.MOREX.r3.2HG0121570
HORVU.MOREX.r3.1HG0020780	HORVU.MOREX.r3.7HG0673580	HORVU.MOREX.r3.6HG0552610	HORVU.MOREX.r3.4HG0415400	HORVU.MOREX.r3.3HG0305380	HORVU.MOREX.r3.2HG0183890	HORVU.MOREX.r3.2HG0121580
HORVU.MOREX.r3.1HG0020790	HORVU.MOREX.r3.7HG0673610	HORVU.MOREX.r3.6HG0552620	HORVU.MOREX.r3.4HG0415410	HORVU.MOREX.r3.3HG0305390	HORVU.MOREX.r3.2HG0183900	HORVU.MOREX.r3.2HG0121590
HORVU.MOREX.r3.1HG0020800	HORVU.MOREX.r3.7HG0673620	HORVU.MOREX.r3.6HG0552690	HORVU.MOREX.r3.4HG0415420	HORVU.MOREX.r3.3HG0305400	HORVU.MOREX.r3.2HG0183920	HORVU.MOREX.r3.2HG0121610
HORVU.MOREX.r3.1HG0020820	HORVU.MOREX.r3.7HG0673630	HORVU.MOREX.r3.6HG0552720	HORVU.MOREX.r3.4HG0415430	HORVU.MOREX.r3.3HG0305410	HORVU.MOREX.r3.2HG0183930	HORVU.MOREX.r3.2HG0123270
HORVU.MOREX.r3.1HG0020840	HORVU.MOREX.r3.7HG0673700	HORVU.MOREX.r3.6HG0552740	HORVU.MOREX.r3.4HG0415460	HORVU.MOREX.r3.3HG0305420	HORVU.MOREX.r3.2HG0183940	HORVU.MOREX.r3.2HG0123280
HORVU.MOREX.r3.1HG0020850	HORVU.MOREX.r3.7HG0673710	HORVU.MOREX.r3.6HG0552750	HORVU.MOREX.r3.4HG0415470	HORVU.MOREX.r3.3HG0305440	HORVU.MOREX.r3.2HG0183960	HORVU.MOREX.r3.5HG0521740
HORVU.MOREX.r3.1HG0020900	HORVU.MOREX.r3.7HG0673750	HORVU.MOREX.r3.6HG0552780	HORVU.MOREX.r3.4HG0415480	HORVU.MOREX.r3.3HG0305460	HORVU.MOREX.r3.2HG0183980	HORVU.MOREX.r3.5HG0521790
HORVU.MOREX.r3.1HG0020910	HORVU.MOREX.r3.7HG0673770	HORVU.MOREX.r3.6HG0552790	HORVU.MOREX.r3.4HG0415490	HORVU.MOREX.r3.3HG0305490	HORVU.MOREX.r3.2HG0183990	HORVU.MOREX.r3.5HG0521840
HORVU.MOREX.r3.1HG0020930	HORVU.MOREX.r3.7HG0673840	HORVU.MOREX.r3.6HG0552800	HORVU.MOREX.r3.4HG0415510	HORVU.MOREX.r3.3HG0305510	HORVU.MOREX.r3.2HG0184000	HORVU.MOREX.r3.5HG0521850
HORVU.MOREX.r3.1HG0020980	HORVU.MOREX.r3.7HG0673950	HORVU.MOREX.r3.6HG0552810	HORVU.MOREX.r3.4HG0415520	HORVU.MOREX.r3.3HG0305520	HORVU.MOREX.r3.2HG0184010	HORVU.MOREX.r3.5HG0521860
HORVU.MOREX.r3.1HG0020990	HORVU.MOREX.r3.7HG0673970	HORVU.MOREX.r3.6HG0552860	HORVU.MOREX.r3.4HG0415530	HORVU.MOREX.r3.3HG0305530	HORVU.MOREX.r3.2HG0184020	HORVU.MOREX.r3.5HG0521870
HORVU.MOREX.r3.1HG0021010	HORVU.MOREX.r3.7HG0674020	HORVU.MOREX.r3.6HG0552880	HORVU.MOREX.r3.4HG0415550	HORVU.MOREX.r3.3HG0305540	HORVU.MOREX.r3.2HG0184050	HORVU.MOREX.r3.5HG0521880
HORVU.MOREX.r3.1HG0021020	HORVU.MOREX.r3.7HG0674080	HORVU.MOREX.r3.6HG0552890	HORVU.MOREX.r3.4HG0415570	HORVU.MOREX.r3.3HG0305550	HORVU.MOREX.r3.2HG0184060	HORVU.MOREX.r3.5HG0521940
HORVU.MOREX.r3.1HG0021090	HORVU.MOREX.r3.7HG0674090	HORVU.MOREX.r3.6HG0552900	HORVU.MOREX.r3.4HG0415590	HORVU.MOREX.r3.3HG0305560	HORVU.MOREX.r3.2HG0184070	HORVU.MOREX.r3.5HG0521960
HORVU.MOREX.r3.1HG0021100	HORVU.MOREX.r3.7HG0674100	HORVU.MOREX.r3.6HG0552970	HORVU.MOREX.r3.4HG0415600	HORVU.MOREX.r3.3HG0305570	HORVU.MOREX.r3.2HG0184080	HORVU.MOREX.r3.5HG0521970
HORVU.MOREX.r3.1HG0021110	HORVU.MOREX.r3.7HG0674110	HORVU.MOREX.r3.6HG0553080	HORVU.MOREX.r3.4HG0415610	HORVU.MOREX.r3.3HG0305600	HORVU.MOREX.r3.2HG0184130	HORVU.MOREX.r3.5HG0522000
HORVU.MOREX.r3.1HG0021120	HORVU.MOREX.r3.7HG0674130	HORVU.MOREX.r3.6HG0553110	HORVU.MOREX.r3.4HG0415620	HORVU.MOREX.r3.3HG0305630	HORVU.MOREX.r3.2HG0184140	HORVU.MOREX.r3.5HG0522020
HORVU.MOREX.r3.1HG0021130	HORVU.MOREX.r3.7HG0674180	HORVU.MOREX.r3.6HG0553120	HORVU.MOREX.r3.4HG0415630	HORVU.MOREX.r3.3HG0305640	HORVU.MOREX.r3.2HG0184150	HORVU.MOREX.r3.5HG0522040
HORVU.MOREX.r3.1HG0021150	HORVU.MOREX.r3.7HG0674200	HORVU.MOREX.r3.6HG0553140	HORVU.MOREX.r3.4HG0415640	HORVU.MOREX.r3.3HG0305690	HORVU.MOREX.r3.2HG0184160	HORVU.MOREX.r3.5HG0522050
HORVU.MOREX.r3.1HG0021190	HORVU.MOREX.r3.7HG0674230	HORVU.MOREX.r3.6HG0553150	HORVU.MOREX.r3.4HG0415650	HORVU.MOREX.r3.3HG0305700	HORVU.MOREX.r3.2HG0184170	HORVU.MOREX.r3.5HG0522060
HORVU.MOREX.r3.1HG0021200	HORVU.MOREX.r3.7HG0674240	HORVU.MOREX.r3.6HG0553180	HORVU.MOREX.r3.4HG0415660	HORVU.MOREX.r3.3HG0305730	HORVU.MOREX.r3.2HG0184180	HORVU.MOREX.r3.5HG0522090
HORVU.MOREX.r3.1HG0021220	HORVU.MOREX.r3.7HG0674250	HORVU.MOREX.r3.6HG0553200	HORVU.MOREX.r3.4HG0415680	HORVU.MOREX.r3.3HG0305770	HORVU.MOREX.r3.2HG0184230	HORVU.MOREX.r3.5HG0522100
HORVU.MOREX.r3.1HG0021240	HORVU.MOREX.r3.7HG0674260	HORVU.MOREX.r3.6HG0553220	HORVU.MOREX.r3.4HG0415690	HORVU.MOREX.r3.3HG0305780	HORVU.MOREX.r3.2HG0184240	HORVU.MOREX.r3.5HG0522120
HORVU.MOREX.r3.1HG0021280	HORVU.MOREX.r3.7HG0674270	HORVU.MOREX.r3.6HG0553250	HORVU.MOREX.r3.4HG0415720	HORVU.MOREX.r3.3HG0305790	HORVU.MOREX.r3.2HG0184250	HORVU.MOREX.r3.5HG0522130
HORVU.MOREX.r3.1HG0021290	HORVU.MOREX.r3.7HG0674310	HORVU.MOREX.r3.6HG0553270	HORVU.MOREX.r3.4HG0415760	HORVU.MOREX.r3.3HG0305800	HORVU.MOREX.r3.2HG0184260	HORVU.MOREX.r3.5HG0522140
HORVU.MOREX.r3.1HG0021310	HORVU.MOREX.r3.7HG0674320	HORVU.MOREX.r3.6HG0553280	HORVU.MOREX.r3.4HG0415770	HORVU.MOREX.r3.3HG0305810	HORVU.MOREX.r3.2HG0184270	HORVU.MOREX.r3.5HG0522160
HORVU.MOREX.r3.1HG0021320	HORVU.MOREX.r3.7HG0674330	HORVU.MOREX.r3.6HG0553290	HORVU.MOREX.r3.4HG0415780	HORVU.MOREX.r3.3HG0305820	HORVU.MOREX.r3.2HG0184290	HORVU.MOREX.r3.5HG0522170
HORVU.MOREX.r3.1HG0021330	HORVU.MOREX.r3.7HG0674340	HORVU.MOREX.r3.6HG0553310	HORVU.MOREX.r3.4HG0415820	HORVU.MOREX.r3.3HG0305830	HORVU.MOREX.r3.2HG0184300	HORVU.MOREX.r3.5HG0522230
HORVU.MOREX.r3.1HG0021340	HORVU.MOREX.r3.7HG0674350	HORVU.MOREX.r3.6HG0553340	HORVU.MOREX.r3.4HG0415840	HORVU.MOREX.r3.3HG0305860	HORVU.MOREX.r3.2HG0184310	HORVU.MOREX.r3.5HG0522240
HORVU.MOREX.r3.1HG0021350	HORVU.MOREX.r3.7HG0674380	HORVU.MOREX.r3.6HG0553350	HORVU.MOREX.r3.4HG0415860	HORVU.MOREX.r3.3HG0305870	HORVU.MOREX.r3.2HG0184320	HORVU.MOREX.r3.5HG0522260
HORVU.MOREX.r3.1HG0021360	HORVU.MOREX.r3.7HG0674400	HORVU.MOREX.r3.6HG0553390	HORVU.MOREX.r3.4HG0415870	HORVU.MOREX.r3.3HG0305900	HORVU.MOREX.r3.2HG0184360	HORVU.MOREX.r3.5HG0522270
HORVU.MOREX.r3.1HG0021380	HORVU.MOREX.r3.7HG0674410	HORVU.MOREX.r3.6HG0553430	HORVU.MOREX.r3.4HG0415890	HORVU.MOREX.r3.3HG0305930	HORVU.MOREX.r3.2HG0184370	HORVU.MOREX.r3.5HG0522290
HORVU.MOREX.r3.1HG0021390	HORVU.MOREX.r3.7HG0674440	HORVU.MOREX.r3.6HG0553440	HORVU.MOREX.r3.4HG0415900	HORVU.MOREX.r3.3HG0305940	HORVU.MOREX.r3.2HG0184380	HORVU.MOREX.r3.5HG0522310
HORVU.MOREX.r3.1HG0021400	HORVU.MOREX.r3.7HG0674460	HORVU.MOREX.r3.6HG0553450	HORVU.MOREX.r3.4HG0415910	HORVU.MOREX.r3.3HG0305950	HORVU.MOREX.r3.2HG0184410	HORVU.MOREX.r3.5HG0522320
HORVU.MOREX.r3.1HG0021430	HORVU.MOREX.r3.7HG0674480	HORVU.MOREX.r3.6HG0553460	HORVU.MOREX.r3.4HG0415950	HORVU.MOREX.r3.3HG0305960	HORVU.MOREX.r3.2HG0184420	HORVU.MOREX.r3.5HG0522340
HORVU.MOREX.r3.1HG0021440	HORVU.MOREX.r3.7HG0674510	HORVU.MOREX.r3.6HG0553470	HORVU.MOREX.r3.4HG0415960	HORVU.MOREX.r3.3HG0305970	HORVU.MOREX.r3.2HG0184430	HORVU.MOREX.r3.5HG0522350
HORVU.MOREX.r3.1HG0021450	HORVU.MOREX.r3.7HG0674520	HORVU.MOREX.r3.6HG0553480	HORVU.MOREX.r3.4HG0415970	HORVU.MOREX.r3.3HG0305980	HORVU.MOREX.r3.2HG0184450	HORVU.MOREX.r3.5HG0522360
HORVU.MOREX.r3.1HG0021570	HORVU.MOREX.r3.7HG0674530	HORVU.MOREX.r3.6HG0553490	HORVU.MOREX.r3.4HG0415980	HORVU.MOREX.r3.3HG0305990	HORVU.MOREX.r3.2HG0184460	HORVU.MOREX.r3.2HG0122470
HORVU.MOREX.r3.1HG0021610	HORVU.MOREX.r3.7HG0674540	HORVU.MOREX.r3.6HG0553500	HORVU.MOREX.r3.4HG0416040	HORVU.MOREX.r3.3HG0306000	HORVU.MOREX.r3.2HG0184480	HORVU.MOREX.r3.2HG0122480
HORVU.MOREX.r3.1HG0021620	HORVU.MOREX.r3.7HG0674550	HORVU.MOREX.r3.6HG0553520	HORVU.MOREX.r3.4HG0416060	HORVU.MOREX.r3.3HG0306010	HORVU.MOREX.r3.2HG0184520	HORVU.MOREX.r3.2HG0122500
HORVU.MOREX.r3.1HG0021640	HORVU.MOREX.r3.7HG0674560	HORVU.MOREX.r3.6HG0553530	HORVU.MOREX.r3.4HG0416070	HORVU.MOREX.r3.3HG0306030	HORVU.MOREX.r3.2HG0184530	HORVU.MOREX.r3.2HG0122510
HORVU.MOREX.r3.1HG0021670	HORVU.MOREX.r3.7HG0674570	HORVU.MOREX.r3.6HG0553580	HORVU.MOREX.r3.4HG0416080	HORVU.MOREX.r3.3HG0306040	HORVU.MOREX.r3.2HG0184540	HORVU.MOREX.r3.2HG0122530
HORVU.MOREX.r3.1HG0021690	HORVU.MOREX.r3.7HG0674600	HORVU.MOREX.r3.6HG0553610	HORVU.MOREX.r3.4HG0416090	HORVU.MOREX.r3.3HG0306050	HORVU.MOREX.r3.2HG0184550	HORVU.MOREX.r3.2HG0122540
HORVU.MOREX.r3.1HG0021710	HORVU.MOREX.r3.7HG0674610	HORVU.MOREX.r3.6HG0553660	HORVU.MOREX.r3.4HG0416100	HORVU.MOREX.r3.3HG0306060	HORVU.MOREX.r3.2HG0184560	HORVU.MOREX.r3.2HG0122550
HORVU.MOREX.r3.1HG0021720	HORVU.MOREX.r3.7HG0674620	HORVU.MOREX.r3.6HG0553720	HORVU.MOREX.r3.4HG0416120	HORVU.MOREX.r3.3HG0306100	HORVU.MOREX.r3.2HG0184570	HORVU.MOREX.r3.2HG0122580
HORVU.MOREX.r3.1HG0021740	HORVU.MOREX.r3.7HG0674640	HORVU.MOREX.r3.6HG0553750	HORVU.MOREX.r3.4HG0416140	HORVU.MOREX.r3.3HG0306120	HORVU.MOREX.r3.2HG0184580	HORVU.MOREX.r3.2HG0122600
HORVU.MOREX.r3.1HG0021770	HORVU.MOREX.r3.7HG0674650	HORVU.MOREX.r3.6HG0553760	HORVU.MOREX.r3.4HG0416150	HORVU.MOREX.r3.3HG0306130	HORVU.MOREX.r3.2HG0184590	HORVU.MOREX.r3.2HG0122610
HORVU.MOREX.r3.1HG0021780	HORVU.MOREX.r3.7HG0674660	HORVU.MOREX.r3.6HG0553810	HORVU.MOREX.r3.4HG0416160	HORVU.MOREX.r3.3HG0306150	HORVU.MOREX.r3.2HG0184620	HORVU.MOREX.r3.2HG0122620
HORVU.MOREX.r3.1HG0021800	HORVU.MOREX.r3.7HG0674680	HORVU.MOREX.r3.6HG0553820	HORVU.MOREX.r3.4HG0416170	HORVU.MOREX.r3.3HG0306160	HORVU.MOREX.r3.2HG0184630	HORVU.MOREX.r3.2HG0122630
HORVU.MOREX.r3.1HG0021810	HORVU.MOREX.r3.7HG0674690	HORVU.MOREX.r3.6HG0553860	HORVU.MOREX.r3.4HG0416190	HORVU.MOREX.r3.3HG0306170	HORVU.MOREX.r3.2HG0184640	HORVU.MOREX.r3.2HG0122640
HORVU.MOREX.r3.1HG0021820	HORVU.MOREX.r3.7HG0674710	HORVU.MOREX.r3.6HG0553870	HORVU.MOREX.r3.4HG0416200	HORVU.MOREX.r3.3HG0306180	HORVU.MOREX.r3.2HG0184650	HORVU.MOREX.r3.2HG0122660
HORVU.MOREX.r3.1HG0021830	HORVU.MOREX.r3.7HG0674720	HORVU.MOREX.r3.6HG0553900	HORVU.MOREX.r3.4HG0416210	HORVU.MOREX.r3.3HG0306200	HORVU.MOREX.r3.2HG0184660	HORVU.MOREX.r3.2HG0123240
HORVU.MOREX.r3.1HG0021840	HORVU.MOREX.r3.7HG0674730	HORVU.MOREX.r3.6HG0553930	HORVU.MOREX.r3.4HG0416220	HORVU.MOREX.r3.3HG0306210	HORVU.MOREX.r3.2HG0184670	HORVU.MOREX.r3.2HG0121670
HORVU.MOREX.r3.1HG0021870	HORVU.MOREX.r3.7HG0674740	HORVU.MOREX.r3.6HG0553990	HORVU.MOREX.r3.4HG0416240	HORVU.MOREX.r3.3HG0306220	HORVU.MOREX.r3.2HG0184680	HORVU.MOREX.r3.2HG0121680
HORVU.MOREX.r3.1HG0021880	HORVU.MOREX.r3.7HG0674750	HORVU.MOREX.r3.6HG0554050	HORVU.MOREX.r3.4HG0416250	HORVU.MOREX.r3.3HG0306240	HORVU.MOREX.r3.2HG0184700	HORVU.MOREX.r3.2HG0121700
HORVU.MOREX.r3.1HG0021960	HORVU.MOREX.r3.7HG0674760	HORVU.MOREX.r3.6HG0554070	HORVU.MOREX.r3.4HG0416260	HORVU.MOREX.r3.3HG0306260	HORVU.MOREX.r3.2HG0184710	HORVU.MOREX.r3.2HG0121760
HORVU.MOREX.r3.1HG0021970	HORVU.MOREX.r3.7HG0674770	HORVU.MOREX.r3.6HG0554120	HORVU.MOREX.r3.4HG0416290	HORVU.MOREX.r3.3HG0306270	HORVU.MOREX.r3.2HG0184740	HORVU.MOREX.r3.2HG0121790
HORVU.MOREX.r3.1HG0021980	HORVU.MOREX.r3.7HG0674790	HORVU.MOREX.r3.6HG0554130	HORVU.MOREX.r3.4HG0416300	HORVU.MOREX.r3.3HG0306300	HORVU.MOREX.r3.2HG0184760	HORVU.MOREX.r3.2HG0121800
HORVU.MOREX.r3.1HG0022060	HORVU.MOREX.r3.7HG0674800	HORVU.MOREX.r3.6HG0554230	HORVU.MOREX.r3.4HG0416320	HORVU.MOREX.r3.3HG0306320	HORVU.MOREX.r3.2HG0184780	HORVU.MOREX.r3.2HG0121820
HORVU.MOREX.r3.1HG0022070	HORVU.MOREX.r3.7HG0674840	HORVU.MOREX.r3.6HG0554260	HORVU.MOREX.r3.4HG0416340	HORVU.MOREX.r3.3HG0306330	HORVU.MOREX.r3.2HG0184820	HORVU.MOREX.r3.2HG0121830
HORVU.MOREX.r3.1HG0022080	HORVU.MOREX.r3.7HG0674850	HORVU.MOREX.r3.6HG0554270	HORVU.MOREX.r3.4HG0416360	HORVU.MOREX.r3.3HG0306340	HORVU.MOREX.r3.2HG0184840	HORVU.MOREX.r3.2HG0121900
HORVU.MOREX.r3.1HG0022090	HORVU.MOREX.r3.7HG0674860	HORVU.MOREX.r3.6HG0554280	HORVU.MOREX.r3.4HG0416370	HORVU.MOREX.r3.3HG0306370	HORVU.MOREX.r3.2HG0184870	HORVU.MOREX.r3.2HG0121930
HORVU.MOREX.r3.1HG0022100	HORVU.MOREX.r3.7HG0674880	HORVU.MOREX.r3.6HG0554310	HORVU.MOREX.r3.4HG0416380	HORVU.MOREX.r3.3HG0306380	HORVU.MOREX.r3.2HG0184890	HORVU.MOREX.r3.2HG0121940
HORVU.MOREX.r3.1HG0022120	HORVU.MOREX.r3.7HG0674890	HORVU.MOREX.r3.6HG0554320	HORVU.MOREX.r3.4HG0416390	HORVU.MOREX.r3.3HG0306390	HORVU.MOREX.r3.2HG0184920	HORVU.MOREX.r3.2HG0121950
HORVU.MOREX.r3.1HG0022320	HORVU.MOREX.r3.7HG0674950	HORVU.MOREX.r3.6HG0554370	HORVU.MOREX.r3.4HG0416400	HORVU.MOREX.r3.3HG0306410	HORVU.MOREX.r3.2HG0184930	HORVU.MOREX.r3.2HG0121960
HORVU.MOREX.r3.1HG0022330	HORVU.MOREX.r3.7HG0674970	HORVU.MOREX.r3.6HG0554400	HORVU.MOREX.r3.4HG0416440	HORVU.MOREX.r3.3HG0306420	HORVU.MOREX.r3.2HG0184960	HORVU.MOREX.r3.2HG0121970
HORVU.MOREX.r3.1HG0022340	HORVU.MOREX.r3.7HG0674990	HORVU.MOREX.r3.6HG0554420	HORVU.MOREX.r3.4HG0416450	HORVU.MOREX.r3.3HG0306430	HORVU.MOREX.r3.2HG0184980	HORVU.MOREX.r3.2HG0121980
HORVU.MOREX.r3.1HG0022350	HORVU.MOREX.r3.7HG0675010	HORVU.MOREX.r3.6HG0554430	HORVU.MOREX.r3.4HG0416460	HORVU.MOREX.r3.3HG0306440	HORVU.MOREX.r3.2HG0184990	HORVU.MOREX.r3.2HG0122000
HORVU.MOREX.r3.1HG0022360	HORVU.MOREX.r3.7HG0675030	HORVU.MOREX.r3.6HG0554480	HORVU.MOREX.r3.4HG0416470	HORVU.MOREX.r3.3HG0306490	HORVU.MOREX.r3.2HG0185000	HORVU.MOREX.r3.2HG0122010
HORVU.MOREX.r3.1HG0022380	HORVU.MOREX.r3.7HG0675040	HORVU.MOREX.r3.6HG0554500	HORVU.MOREX.r3.4HG0416530	HORVU.MOREX.r3.3HG0306540	HORVU.MOREX.r3.2HG0185030	HORVU.MOREX.r3.2HG0122020
HORVU.MOREX.r3.1HG0022400	HORVU.MOREX.r3.7HG0675060	HORVU.MOREX.r3.6HG0554520	HORVU.MOREX.r3.4HG0416540	HORVU.MOREX.r3.3HG0306550	HORVU.MOREX.r3.2HG0185050	HORVU.MOREX.r3.2HG0122040
HORVU.MOREX.r3.1HG0022430	HORVU.MOREX.r3.7HG0675090	HORVU.MOREX.r3.6HG0554540	HORVU.MOREX.r3.4HG0416550	HORVU.MOREX.r3.3HG0306590	HORVU.MOREX.r3.2HG0185060	HORVU.MOREX.r3.2HG0122050
HORVU.MOREX.r3.1HG0022440	HORVU.MOREX.r3.7HG0675160	HORVU.MOREX.r3.6HG0554560	HORVU.MOREX.r3.4HG0416560	HORVU.MOREX.r3.3HG0306600	HORVU.MOREX.r3.2HG0185070	HORVU.MOREX.r3.2HG0122060
HORVU.MOREX.r3.1HG0022450	HORVU.MOREX.r3.7HG0675190	HORVU.MOREX.r3.6HG0554610	HORVU.MOREX.r3.4HG0416570	HORVU.MOREX.r3.3HG0306610	HORVU.MOREX.r3.2HG0185090	HORVU.MOREX.r3.2HG0122070
HORVU.MOREX.r3.1HG0022460	HORVU.MOREX.r3.7HG0675210	HORVU.MOREX.r3.6HG0554620	HORVU.MOREX.r3.4HG0416600	HORVU.MOREX.r3.3HG0306620	HORVU.MOREX.r3.2HG0185100	HORVU.MOREX.r3.2HG0122080
HORVU.MOREX.r3.1HG0022490	HORVU.MOREX.r3.7HG0675240	HORVU.MOREX.r3.6HG0554630	HORVU.MOREX.r3.4HG0416610	HORVU.MOREX.r3.3HG0306630	HORVU.MOREX.r3.2HG0185130	HORVU.MOREX.r3.2HG0122090
HORVU.MOREX.r3.1HG0022500	HORVU.MOREX.r3.7HG0675260	HORVU.MOREX.r3.6HG0554650	HORVU.MOREX.r3.4HG0416620	HORVU.MOREX.r3.3HG0306650	HORVU.MOREX.r3.2HG0185140	HORVU.MOREX.r3.2HG0122100
HORVU.MOREX.r3.1HG0022530	HORVU.MOREX.r3.7HG0675270	HORVU.MOREX.r3.6HG0554680	HORVU.MOREX.r3.4HG0416640	HORVU.MOREX.r3.3HG0306670	HORVU.MOREX.r3.2HG0185160	HORVU.MOREX.r3.2HG0122110
HORVU.MOREX.r3.1HG0022540	HORVU.MOREX.r3.7HG0675280	HORVU.MOREX.r3.6HG0554690	HORVU.MOREX.r3.4HG0416670	HORVU.MOREX.r3.3HG0306680	HORVU.MOREX.r3.2HG0185190	HORVU.MOREX.r3.2HG0122120
HORVU.MOREX.r3.1HG0022550	HORVU.MOREX.r3.7HG0675290	HORVU.MOREX.r3.6HG0554700	HORVU.MOREX.r3.4HG0416690	HORVU.MOREX.r3.3HG0306690	HORVU.MOREX.r3.2HG0185210	HORVU.MOREX.r3.2HG0122130
HORVU.MOREX.r3.1HG0022560	HORVU.MOREX.r3.7HG0675320	HORVU.MOREX.r3.6HG0554710	HORVU.MOREX.r3.4HG0416700	HORVU.MOREX.r3.3HG0306700	HORVU.MOREX.r3.2HG0185220	HORVU.MOREX.r3.2HG0122140
HORVU.MOREX.r3.1HG0022570	HORVU.MOREX.r3.7HG0675370	HORVU.MOREX.r3.6HG0554720	HORVU.MOREX.r3.4HG0416710	HORVU.MOREX.r3.3HG0306710	HORVU.MOREX.r3.2HG0185230	HORVU.MOREX.r3.2HG0122160
HORVU.MOREX.r3.1HG0022580	HORVU.MOREX.r3.7HG0675390	HORVU.MOREX.r3.6HG0554750	HORVU.MOREX.r3.4HG0416720	HORVU.MOREX.r3.3HG0306720	HORVU.MOREX.r3.2HG0185240	HORVU.MOREX.r3.2HG0122170
HORVU.MOREX.r3.1HG0022660	HORVU.MOREX.r3.7HG0675400	HORVU.MOREX.r3.6HG0554790	HORVU.MOREX.r3.4HG0416730	HORVU.MOREX.r3.3HG0306730	HORVU.MOREX.r3.2HG0185260	HORVU.MOREX.r3.2HG0122190
HORVU.MOREX.r3.1HG0022680	HORVU.MOREX.r3.7HG0675410	HORVU.MOREX.r3.6HG0554800	HORVU.MOREX.r3.4HG0416740	HORVU.MOREX.r3.3HG0306740	HORVU.MOREX.r3.2HG0185290	HORVU.MOREX.r3.2HG0122200
HORVU.MOREX.r3.1HG0022700	HORVU.MOREX.r3.7HG0675420	HORVU.MOREX.r3.6HG0554810	HORVU.MOREX.r3.4HG0416750	HORVU.MOREX.r3.3HG0306750	HORVU.MOREX.r3.2HG0185300	HORVU.MOREX.r3.2HG0122210
HORVU.MOREX.r3.1HG0022730	HORVU.MOREX.r3.7HG0675480	HORVU.MOREX.r3.6HG0554840	HORVU.MOREX.r3.4HG0416780	HORVU.MOREX.r3.3HG0306830	HORVU.MOREX.r3.2HG0185310	HORVU.MOREX.r3.2HG0122340
HORVU.MOREX.r3.1HG0022740	HORVU.MOREX.r3.7HG0675490	HORVU.MOREX.r3.6HG0554910	HORVU.MOREX.r3.4HG0416810	HORVU.MOREX.r3.3HG0306840	HORVU.MOREX.r3.2HG0185320	HORVU.MOREX.r3.2HG0122350
HORVU.MOREX.r3.1HG0022750	HORVU.MOREX.r3.7HG0675500	HORVU.MOREX.r3.6HG0554960	HORVU.MOREX.r3.4HG0416820	HORVU.MOREX.r3.3HG0306850	HORVU.MOREX.r3.2HG0185330	HORVU.MOREX.r3.2HG0122360
HORVU.MOREX.r3.1HG0022760	HORVU.MOREX.r3.7HG0675510	HORVU.MOREX.r3.6HG0554970	HORVU.MOREX.r3.4HG0416910	HORVU.MOREX.r3.3HG0306860	HORVU.MOREX.r3.2HG0185340	HORVU.MOREX.r3.2HG0122400
HORVU.MOREX.r3.1HG0022780	HORVU.MOREX.r3.7HG0675530	HORVU.MOREX.r3.6HG0554980	HORVU.MOREX.r3.4HG0416920	HORVU.MOREX.r3.3HG0306880	HORVU.MOREX.r3.2HG0185360	HORVU.MOREX.r3.2HG0122420
HORVU.MOREX.r3.1HG0022790	HORVU.MOREX.r3.7HG0675540	HORVU.MOREX.r3.6HG0554990	HORVU.MOREX.r3.4HG0416940	HORVU.MOREX.r3.3HG0306890	HORVU.MOREX.r3.2HG0185370	HORVU.MOREX.r3.2HG0122430
HORVU.MOREX.r3.1HG0022860	HORVU.MOREX.r3.7HG0675560	HORVU.MOREX.r3.6HG0555000	HORVU.MOREX.r3.4HG0416950	HORVU.MOREX.r3.3HG0306910	HORVU.MOREX.r3.2HG0185380	HORVU.MOREX.r3.2HG0122440
HORVU.MOREX.r3.1HG0022870	HORVU.MOREX.r3.7HG0675570	HORVU.MOREX.r3.6HG0555030	HORVU.MOREX.r3.4HG0416970	HORVU.MOREX.r3.3HG0306920	HORVU.MOREX.r3.2HG0185390	HORVU.MOREX.r3.2HG0122460
HORVU.MOREX.r3.1HG0022890	HORVU.MOREX.r3.7HG0675580	HORVU.MOREX.r3.6HG0555040	HORVU.MOREX.r3.4HG0416980	HORVU.MOREX.r3.3HG0306970	HORVU.MOREX.r3.2HG0185400	HORVU.MOREX.r3.2HG0128720
HORVU.MOREX.r3.1HG0022910	HORVU.MOREX.r3.7HG0675630	HORVU.MOREX.r3.6HG0555060	HORVU.MOREX.r3.4HG0417010	HORVU.MOREX.r3.3HG0306990	HORVU.MOREX.r3.2HG0185430	HORVU.MOREX.r3.2HG0128730
HORVU.MOREX.r3.1HG0022990	HORVU.MOREX.r3.7HG0675670	HORVU.MOREX.r3.6HG0555090	HORVU.MOREX.r3.4HG0417030	HORVU.MOREX.r3.3HG0307000	HORVU.MOREX.r3.2HG0185440	HORVU.MOREX.r3.2HG0128750
HORVU.MOREX.r3.1HG0023010	HORVU.MOREX.r3.7HG0675690	HORVU.MOREX.r3.6HG0555110	HORVU.MOREX.r3.4HG0417040	HORVU.MOREX.r3.3HG0307010	HORVU.MOREX.r3.2HG0185450	HORVU.MOREX.r3.2HG0128790
HORVU.MOREX.r3.1HG0023130	HORVU.MOREX.r3.7HG0675710	HORVU.MOREX.r3.6HG0555140	HORVU.MOREX.r3.4HG0417070	HORVU.MOREX.r3.3HG0307020	HORVU.MOREX.r3.2HG0185460	HORVU.MOREX.r3.2HG0128800
HORVU.MOREX.r3.1HG0023140	HORVU.MOREX.r3.7HG0675770	HORVU.MOREX.r3.6HG0555150	HORVU.MOREX.r3.4HG0417080	HORVU.MOREX.r3.3HG0307030	HORVU.MOREX.r3.2HG0185480	HORVU.MOREX.r3.3HG0285860
HORVU.MOREX.r3.1HG0023150	HORVU.MOREX.r3.7HG0675780	HORVU.MOREX.r3.6HG0555160	HORVU.MOREX.r3.4HG0417090	HORVU.MOREX.r3.3HG0307040	HORVU.MOREX.r3.2HG0185490	HORVU.MOREX.r3.3HG0285890
HORVU.MOREX.r3.1HG0023200	HORVU.MOREX.r3.7HG0675800	HORVU.MOREX.r3.6HG0555170	HORVU.MOREX.r3.4HG0417130	HORVU.MOREX.r3.3HG0307120	HORVU.MOREX.r3.2HG0185500	HORVU.MOREX.r3.3HG0285900
HORVU.MOREX.r3.1HG0023210	HORVU.MOREX.r3.7HG0675810	HORVU.MOREX.r3.6HG0555190	HORVU.MOREX.r3.4HG0417160	HORVU.MOREX.r3.3HG0307130	HORVU.MOREX.r3.2HG0185510	HORVU.MOREX.r3.3HG0285920
HORVU.MOREX.r3.1HG0023220	HORVU.MOREX.r3.7HG0675830	HORVU.MOREX.r3.6HG0555220	HORVU.MOREX.r3.4HG0417170	HORVU.MOREX.r3.3HG0307140	HORVU.MOREX.r3.2HG0185540	HORVU.MOREX.r3.3HG0285930
HORVU.MOREX.r3.1HG0023230	HORVU.MOREX.r3.7HG0675840	HORVU.MOREX.r3.6HG0555230	HORVU.MOREX.r3.4HG0417190	HORVU.MOREX.r3.3HG0307150	HORVU.MOREX.r3.2HG0185550	HORVU.MOREX.r3.3HG0285940
HORVU.MOREX.r3.1HG0023240	HORVU.MOREX.r3.7HG0675850	HORVU.MOREX.r3.6HG0555240	HORVU.MOREX.r3.4HG0417200	HORVU.MOREX.r3.3HG0307160	HORVU.MOREX.r3.2HG0185570	HORVU.MOREX.r3.3HG0285980
HORVU.MOREX.r3.1HG0023250	HORVU.MOREX.r3.7HG0675890	HORVU.MOREX.r3.6HG0555250	HORVU.MOREX.r3.4HG0417220	HORVU.MOREX.r3.3HG0307170	HORVU.MOREX.r3.2HG0185580	HORVU.MOREX.r3.3HG0286010
HORVU.MOREX.r3.1HG0023300	HORVU.MOREX.r3.7HG0675910	HORVU.MOREX.r3.6HG0555260	HORVU.MOREX.r3.4HG0417250	HORVU.MOREX.r3.3HG0307200	HORVU.MOREX.r3.2HG0185590	HORVU.MOREX.r3.3HG0286060
HORVU.MOREX.r3.1HG0023370	HORVU.MOREX.r3.7HG0675920	HORVU.MOREX.r3.6HG0555270	HORVU.MOREX.r3.4HG0417260	HORVU.MOREX.r3.3HG0307210	HORVU.MOREX.r3.2HG0185610	HORVU.MOREX.r3.3HG0286070
HORVU.MOREX.r3.1HG0023420	HORVU.MOREX.r3.7HG0675940	HORVU.MOREX.r3.6HG0555290	HORVU.MOREX.r3.4HG0417270	HORVU.MOREX.r3.3HG0307220	HORVU.MOREX.r3.2HG0185630	HORVU.MOREX.r3.3HG0286080
HORVU.MOREX.r3.1HG0023540	HORVU.MOREX.r3.7HG0675950	HORVU.MOREX.r3.6HG0555330	HORVU.MOREX.r3.4HG0417280	HORVU.MOREX.r3.3HG0307240	HORVU.MOREX.r3.2HG0185640	HORVU.MOREX.r3.3HG0286090
HORVU.MOREX.r3.1HG0023550	HORVU.MOREX.r3.7HG0675960	HORVU.MOREX.r3.6HG0555350	HORVU.MOREX.r3.4HG0417290	HORVU.MOREX.r3.3HG0307250	HORVU.MOREX.r3.2HG0185650	HORVU.MOREX.r3.3HG0286100
HORVU.MOREX.r3.1HG0023580	HORVU.MOREX.r3.7HG0675970	HORVU.MOREX.r3.6HG0555370	HORVU.MOREX.r3.4HG0417300	HORVU.MOREX.r3.3HG0307280	HORVU.MOREX.r3.2HG0185660	HORVU.MOREX.r3.3HG0286110
HORVU.MOREX.r3.1HG0023590	HORVU.MOREX.r3.7HG0676000	HORVU.MOREX.r3.6HG0555430	HORVU.MOREX.r3.4HG0417310	HORVU.MOREX.r3.3HG0307290	HORVU.MOREX.r3.2HG0185670	HORVU.MOREX.r3.3HG0286130
HORVU.MOREX.r3.1HG0023600	HORVU.MOREX.r3.7HG0676010	HORVU.MOREX.r3.6HG0555440	HORVU.MOREX.r3.4HG0417320	HORVU.MOREX.r3.3HG0307300	HORVU.MOREX.r3.2HG0185760	HORVU.MOREX.r3.3HG0286140
HORVU.MOREX.r3.1HG0023610	HORVU.MOREX.r3.7HG0676020	HORVU.MOREX.r3.6HG0555500	HORVU.MOREX.r3.4HG0417370	HORVU.MOREX.r3.3HG0307310	HORVU.MOREX.r3.2HG0185770	HORVU.MOREX.r3.3HG0286160
HORVU.MOREX.r3.1HG0023620	HORVU.MOREX.r3.7HG0676040	HORVU.MOREX.r3.6HG0555510	HORVU.MOREX.r3.4HG0417380	HORVU.MOREX.r3.3HG0307320	HORVU.MOREX.r3.2HG0185800	HORVU.MOREX.r3.3HG0286170
HORVU.MOREX.r3.1HG0023630	HORVU.MOREX.r3.7HG0676080	HORVU.MOREX.r3.6HG0555520	HORVU.MOREX.r3.4HG0417390	HORVU.MOREX.r3.3HG0307330	HORVU.MOREX.r3.2HG0185820	HORVU.MOREX.r3.3HG0286190
HORVU.MOREX.r3.1HG0023640	HORVU.MOREX.r3.7HG0676100	HORVU.MOREX.r3.6HG0555530	HORVU.MOREX.r3.4HG0417400	HORVU.MOREX.r3.3HG0307340	HORVU.MOREX.r3.2HG0185830	HORVU.MOREX.r3.3HG0286200
HORVU.MOREX.r3.1HG0023650	HORVU.MOREX.r3.7HG0676110	HORVU.MOREX.r3.6HG0555560	HORVU.MOREX.r3.4HG0417410	HORVU.MOREX.r3.3HG0307350	HORVU.MOREX.r3.2HG0185840	HORVU.MOREX.r3.3HG0286220
HORVU.MOREX.r3.1HG0023680	HORVU.MOREX.r3.7HG0676130	HORVU.MOREX.r3.6HG0555570	HORVU.MOREX.r3.4HG0417450	HORVU.MOREX.r3.3HG0307360	HORVU.MOREX.r3.2HG0185850	HORVU.MOREX.r3.3HG0286240
HORVU.MOREX.r3.1HG0023710	HORVU.MOREX.r3.7HG0676140	HORVU.MOREX.r3.6HG0555590	HORVU.MOREX.r3.4HG0417480	HORVU.MOREX.r3.3HG0307370	HORVU.MOREX.r3.2HG0185860	HORVU.MOREX.r3.3HG0286250
HORVU.MOREX.r3.1HG0023740	HORVU.MOREX.r3.7HG0676160	HORVU.MOREX.r3.6HG0555630	HORVU.MOREX.r3.4HG0417490	HORVU.MOREX.r3.3HG0307380	HORVU.MOREX.r3.2HG0185870	HORVU.MOREX.r3.2HG0122670
HORVU.MOREX.r3.1HG0023760	HORVU.MOREX.r3.7HG0676180	HORVU.MOREX.r3.6HG0555640	HORVU.MOREX.r3.4HG0417500	HORVU.MOREX.r3.3HG0307390	HORVU.MOREX.r3.2HG0185880	HORVU.MOREX.r3.2HG0122700
HORVU.MOREX.r3.1HG0023770	HORVU.MOREX.r3.7HG0676220	HORVU.MOREX.r3.6HG0555650	HORVU.MOREX.r3.4HG0417510	HORVU.MOREX.r3.3HG0307400	HORVU.MOREX.r3.2HG0185890	HORVU.MOREX.r3.2HG0122720
HORVU.MOREX.r3.1HG0023810	HORVU.MOREX.r3.7HG0676240	HORVU.MOREX.r3.6HG0555660	HORVU.MOREX.r3.4HG0417520	HORVU.MOREX.r3.3HG0307410	HORVU.MOREX.r3.2HG0185910	HORVU.MOREX.r3.2HG0122750
HORVU.MOREX.r3.1HG0023820	HORVU.MOREX.r3.7HG0676250	HORVU.MOREX.r3.6HG0555670	HORVU.MOREX.r3.4HG0417540	HORVU.MOREX.r3.3HG0307420	HORVU.MOREX.r3.2HG0185930	HORVU.MOREX.r3.2HG0122760
HORVU.MOREX.r3.1HG0023840	HORVU.MOREX.r3.7HG0676300	HORVU.MOREX.r3.6HG0555690	HORVU.MOREX.r3.4HG0417550	HORVU.MOREX.r3.3HG0307460	HORVU.MOREX.r3.2HG0185960	HORVU.MOREX.r3.2HG0122770
HORVU.MOREX.r3.1HG0023870	HORVU.MOREX.r3.7HG0676340	HORVU.MOREX.r3.6HG0555700	HORVU.MOREX.r3.4HG0417570	HORVU.MOREX.r3.3HG0307470	HORVU.MOREX.r3.2HG0185970	HORVU.MOREX.r3.2HG0122780
HORVU.MOREX.r3.1HG0023920	HORVU.MOREX.r3.7HG0676350	HORVU.MOREX.r3.6HG0555740	HORVU.MOREX.r3.4HG0417580	HORVU.MOREX.r3.3HG0307480	HORVU.MOREX.r3.2HG0185980	HORVU.MOREX.r3.2HG0122800
HORVU.MOREX.r3.1HG0023930	HORVU.MOREX.r3.7HG0676380	HORVU.MOREX.r3.6HG0555800	HORVU.MOREX.r3.4HG0417590	HORVU.MOREX.r3.3HG0307490	HORVU.MOREX.r3.2HG0186020	HORVU.MOREX.r3.2HG0122830
HORVU.MOREX.r3.1HG0023940	HORVU.MOREX.r3.7HG0676390	HORVU.MOREX.r3.6HG0555810	HORVU.MOREX.r3.4HG0417620	HORVU.MOREX.r3.3HG0307510	HORVU.MOREX.r3.2HG0186030	HORVU.MOREX.r3.2HG0122840
HORVU.MOREX.r3.1HG0023950	HORVU.MOREX.r3.7HG0676400	HORVU.MOREX.r3.6HG0555820	HORVU.MOREX.r3.4HG0417630	HORVU.MOREX.r3.3HG0307530	HORVU.MOREX.r3.2HG0186060	HORVU.MOREX.r3.2HG0122880
HORVU.MOREX.r3.1HG0023970	HORVU.MOREX.r3.7HG0676410	HORVU.MOREX.r3.6HG0555830	HORVU.MOREX.r3.4HG0417640	HORVU.MOREX.r3.3HG0307540	HORVU.MOREX.r3.2HG0186080	HORVU.MOREX.r3.2HG0122890
HORVU.MOREX.r3.1HG0023990	HORVU.MOREX.r3.7HG0676420	HORVU.MOREX.r3.6HG0555850	HORVU.MOREX.r3.4HG0417650	HORVU.MOREX.r3.3HG0307560	HORVU.MOREX.r3.2HG0186150	HORVU.MOREX.r3.2HG0122900
HORVU.MOREX.r3.1HG0024020	HORVU.MOREX.r3.7HG0676500	HORVU.MOREX.r3.6HG0555860	HORVU.MOREX.r3.4HG0417660	HORVU.MOREX.r3.3HG0307620	HORVU.MOREX.r3.2HG0186160	HORVU.MOREX.r3.2HG0122940
HORVU.MOREX.r3.1HG0024030	HORVU.MOREX.r3.7HG0676510	HORVU.MOREX.r3.6HG0555870	HORVU.MOREX.r3.4HG0417670	HORVU.MOREX.r3.3HG0307630	HORVU.MOREX.r3.2HG0186180	HORVU.MOREX.r3.2HG0123000
HORVU.MOREX.r3.1HG0024040	HORVU.MOREX.r3.7HG0676530	HORVU.MOREX.r3.6HG0555880	HORVU.MOREX.r3.4HG0417680	HORVU.MOREX.r3.3HG0307700	HORVU.MOREX.r3.2HG0186190	HORVU.MOREX.r3.2HG0123020
HORVU.MOREX.r3.1HG0024050	HORVU.MOREX.r3.7HG0676550	HORVU.MOREX.r3.6HG0555930	HORVU.MOREX.r3.4HG0417690	HORVU.MOREX.r3.3HG0307740	HORVU.MOREX.r3.2HG0186200	HORVU.MOREX.r3.2HG0123040
HORVU.MOREX.r3.1HG0024060	HORVU.MOREX.r3.7HG0676570	HORVU.MOREX.r3.6HG0555940	HORVU.MOREX.r3.4HG0417700	HORVU.MOREX.r3.3HG0307760	HORVU.MOREX.r3.2HG0186210	HORVU.MOREX.r3.2HG0123050
HORVU.MOREX.r3.1HG0024070	HORVU.MOREX.r3.7HG0676590	HORVU.MOREX.r3.6HG0555950	HORVU.MOREX.r3.4HG0417710	HORVU.MOREX.r3.3HG0307780	HORVU.MOREX.r3.2HG0186230	HORVU.MOREX.r3.2HG0123060
HORVU.MOREX.r3.1HG0024090	HORVU.MOREX.r3.7HG0676610	HORVU.MOREX.r3.6HG0555970	HORVU.MOREX.r3.4HG0417720	HORVU.MOREX.r3.3HG0307800	HORVU.MOREX.r3.2HG0186240	HORVU.MOREX.r3.2HG0123070
HORVU.MOREX.r3.1HG0024140	HORVU.MOREX.r3.7HG0676630	HORVU.MOREX.r3.6HG0555990	HORVU.MOREX.r3.4HG0417740	HORVU.MOREX.r3.3HG0307810	HORVU.MOREX.r3.2HG0186300	HORVU.MOREX.r3.2HG0123080
HORVU.MOREX.r3.1HG0024150	HORVU.MOREX.r3.7HG0676640	HORVU.MOREX.r3.6HG0556000	HORVU.MOREX.r3.4HG0417750	HORVU.MOREX.r3.3HG0307820	HORVU.MOREX.r3.2HG0186310	HORVU.MOREX.r3.2HG0123090
HORVU.MOREX.r3.1HG0024200	HORVU.MOREX.r3.7HG0676660	HORVU.MOREX.r3.6HG0556050	HORVU.MOREX.r3.4HG0417760	HORVU.MOREX.r3.3HG0307840	HORVU.MOREX.r3.2HG0186340	HORVU.MOREX.r3.2HG0123170
HORVU.MOREX.r3.1HG0024210	HORVU.MOREX.r3.7HG0676670	HORVU.MOREX.r3.6HG0556090	HORVU.MOREX.r3.4HG0417790	HORVU.MOREX.r3.3HG0307850	HORVU.MOREX.r3.2HG0186360	HORVU.MOREX.r3.2HG0123180
HORVU.MOREX.r3.1HG0024220	HORVU.MOREX.r3.7HG0676690	HORVU.MOREX.r3.6HG0556100	HORVU.MOREX.r3.4HG0417800	HORVU.MOREX.r3.3HG0307860	HORVU.MOREX.r3.2HG0186370	HORVU.MOREX.r3.2HG0127740
HORVU.MOREX.r3.1HG0024230	HORVU.MOREX.r3.7HG0676720	HORVU.MOREX.r3.6HG0556120	HORVU.MOREX.r3.4HG0417810	HORVU.MOREX.r3.3HG0307870	HORVU.MOREX.r3.2HG0186400	HORVU.MOREX.r3.2HG0127900
HORVU.MOREX.r3.1HG0024260	HORVU.MOREX.r3.7HG0676730	HORVU.MOREX.r3.6HG0556130	HORVU.MOREX.r3.4HG0417830	HORVU.MOREX.r3.3HG0307880	HORVU.MOREX.r3.2HG0186410	HORVU.MOREX.r3.2HG0127940
HORVU.MOREX.r3.1HG0024280	HORVU.MOREX.r3.7HG0676790	HORVU.MOREX.r3.6HG0556160	HORVU.MOREX.r3.4HG0417840	HORVU.MOREX.r3.3HG0307890	HORVU.MOREX.r3.2HG0186430	HORVU.MOREX.r3.2HG0127950
HORVU.MOREX.r3.1HG0024290	HORVU.MOREX.r3.7HG0676800	HORVU.MOREX.r3.6HG0556170	HORVU.MOREX.r3.4HG0417850	HORVU.MOREX.r3.3HG0307900	HORVU.MOREX.r3.2HG0186440	HORVU.MOREX.r3.2HG0127960
HORVU.MOREX.r3.1HG0024310	HORVU.MOREX.r3.7HG0676820	HORVU.MOREX.r3.6HG0556240	HORVU.MOREX.r3.4HG0417880	HORVU.MOREX.r3.3HG0307910	HORVU.MOREX.r3.2HG0186470	HORVU.MOREX.r3.2HG0127970
HORVU.MOREX.r3.1HG0024340	HORVU.MOREX.r3.7HG0676830	HORVU.MOREX.r3.6HG0556250	HORVU.MOREX.r3.4HG0417900	HORVU.MOREX.r3.3HG0307920	HORVU.MOREX.r3.2HG0186480	HORVU.MOREX.r3.2HG0127980
HORVU.MOREX.r3.1HG0024360	HORVU.MOREX.r3.7HG0676840	HORVU.MOREX.r3.6HG0556260	HORVU.MOREX.r3.4HG0417910	HORVU.MOREX.r3.3HG0307930	HORVU.MOREX.r3.2HG0186490	HORVU.MOREX.r3.2HG0127990
HORVU.MOREX.r3.1HG0024370	HORVU.MOREX.r3.7HG0676860	HORVU.MOREX.r3.6HG0556270	HORVU.MOREX.r3.4HG0417920	HORVU.MOREX.r3.3HG0307950	HORVU.MOREX.r3.2HG0186500	HORVU.MOREX.r3.2HG0128000
HORVU.MOREX.r3.1HG0024380	HORVU.MOREX.r3.7HG0676880	HORVU.MOREX.r3.6HG0556280	HORVU.MOREX.r3.4HG0417930	HORVU.MOREX.r3.3HG0307960	HORVU.MOREX.r3.2HG0186510	HORVU.MOREX.r3.2HG0128010
HORVU.MOREX.r3.1HG0024440	HORVU.MOREX.r3.7HG0676890	HORVU.MOREX.r3.6HG0556330	HORVU.MOREX.r3.4HG0417960	HORVU.MOREX.r3.3HG0307970	HORVU.MOREX.r3.2HG0186530	HORVU.MOREX.r3.2HG0128020
HORVU.MOREX.r3.1HG0024500	HORVU.MOREX.r3.7HG0676900	HORVU.MOREX.r3.6HG0556360	HORVU.MOREX.r3.4HG0417970	HORVU.MOREX.r3.3HG0308000	HORVU.MOREX.r3.2HG0186540	HORVU.MOREX.r3.2HG0128030
HORVU.MOREX.r3.1HG0024510	HORVU.MOREX.r3.7HG0676910	HORVU.MOREX.r3.6HG0556420	HORVU.MOREX.r3.4HG0418020	HORVU.MOREX.r3.3HG0308010	HORVU.MOREX.r3.2HG0186550	HORVU.MOREX.r3.2HG0128040
HORVU.MOREX.r3.1HG0024560	HORVU.MOREX.r3.7HG0676980	HORVU.MOREX.r3.6HG0556470	HORVU.MOREX.r3.4HG0418110	HORVU.MOREX.r3.3HG0308020	HORVU.MOREX.r3.2HG0186560	HORVU.MOREX.r3.2HG0128070
HORVU.MOREX.r3.1HG0024570	HORVU.MOREX.r3.7HG0676990	HORVU.MOREX.r3.6HG0556480	HORVU.MOREX.r3.4HG0418120	HORVU.MOREX.r3.3HG0308030	HORVU.MOREX.r3.2HG0186630	HORVU.MOREX.r3.2HG0128090
HORVU.MOREX.r3.1HG0024600	HORVU.MOREX.r3.7HG0677050	HORVU.MOREX.r3.6HG0556490	HORVU.MOREX.r3.4HG0418130	HORVU.MOREX.r3.3HG0308040	HORVU.MOREX.r3.2HG0186650	HORVU.MOREX.r3.2HG0128100
HORVU.MOREX.r3.1HG0024650	HORVU.MOREX.r3.7HG0677060	HORVU.MOREX.r3.6HG0556530	HORVU.MOREX.r3.4HG0418140	HORVU.MOREX.r3.3HG0308050	HORVU.MOREX.r3.2HG0186670	HORVU.MOREX.r3.2HG0128110
HORVU.MOREX.r3.1HG0024670	HORVU.MOREX.r3.7HG0677070	HORVU.MOREX.r3.6HG0556540	HORVU.MOREX.r3.4HG0418160	HORVU.MOREX.r3.3HG0308070	HORVU.MOREX.r3.2HG0186680	HORVU.MOREX.r3.2HG0128170
HORVU.MOREX.r3.1HG0024690	HORVU.MOREX.r3.7HG0677110	HORVU.MOREX.r3.6HG0556550	HORVU.MOREX.r3.4HG0418170	HORVU.MOREX.r3.3HG0308080	HORVU.MOREX.r3.2HG0186690	HORVU.MOREX.r3.2HG0128190
HORVU.MOREX.r3.1HG0024710	HORVU.MOREX.r3.7HG0677120	HORVU.MOREX.r3.6HG0556580	HORVU.MOREX.r3.4HG0418180	HORVU.MOREX.r3.3HG0308140	HORVU.MOREX.r3.2HG0186700	HORVU.MOREX.r3.2HG0128200
HORVU.MOREX.r3.1HG0024730	HORVU.MOREX.r3.7HG0677140	HORVU.MOREX.r3.6HG0556600	HORVU.MOREX.r3.4HG0418190	HORVU.MOREX.r3.3HG0308150	HORVU.MOREX.r3.2HG0186710	HORVU.MOREX.r3.2HG0128220
HORVU.MOREX.r3.1HG0024740	HORVU.MOREX.r3.7HG0677150	HORVU.MOREX.r3.6HG0556640	HORVU.MOREX.r3.4HG0418200	HORVU.MOREX.r3.3HG0308180	HORVU.MOREX.r3.2HG0186720	HORVU.MOREX.r3.2HG0128230
HORVU.MOREX.r3.1HG0024800	HORVU.MOREX.r3.7HG0677170	HORVU.MOREX.r3.6HG0556660	HORVU.MOREX.r3.4HG0418210	HORVU.MOREX.r3.3HG0308190	HORVU.MOREX.r3.2HG0186730	HORVU.MOREX.r3.2HG0128240
HORVU.MOREX.r3.1HG0024860	HORVU.MOREX.r3.7HG0677180	HORVU.MOREX.r3.6HG0556710	HORVU.MOREX.r3.4HG0418220	HORVU.MOREX.r3.3HG0308200	HORVU.MOREX.r3.2HG0186750	HORVU.MOREX.r3.2HG0128250
HORVU.MOREX.r3.1HG0024880	HORVU.MOREX.r3.7HG0677190	HORVU.MOREX.r3.6HG0556720	HORVU.MOREX.r3.4HG0418230	HORVU.MOREX.r3.3HG0308230	HORVU.MOREX.r3.2HG0186770	HORVU.MOREX.r3.2HG0128260
HORVU.MOREX.r3.1HG0024900	HORVU.MOREX.r3.7HG0677200	HORVU.MOREX.r3.6HG0556730	HORVU.MOREX.r3.4HG0418250	HORVU.MOREX.r3.3HG0308240	HORVU.MOREX.r3.2HG0186780	HORVU.MOREX.r3.2HG0128270
HORVU.MOREX.r3.1HG0024910	HORVU.MOREX.r3.7HG0677220	HORVU.MOREX.r3.6HG0556760	HORVU.MOREX.r3.4HG0418290	HORVU.MOREX.r3.3HG0308250	HORVU.MOREX.r3.2HG0186820	HORVU.MOREX.r3.2HG0128280
HORVU.MOREX.r3.1HG0024920	HORVU.MOREX.r3.7HG0677230	HORVU.MOREX.r3.6HG0556780	HORVU.MOREX.r3.4HG0418330	HORVU.MOREX.r3.3HG0308270	HORVU.MOREX.r3.2HG0186840	HORVU.MOREX.r3.2HG0128290
HORVU.MOREX.r3.1HG0024930	HORVU.MOREX.r3.7HG0677260	HORVU.MOREX.r3.6HG0556800	HORVU.MOREX.r3.4HG0418340	HORVU.MOREX.r3.3HG0308290	HORVU.MOREX.r3.2HG0186850	HORVU.MOREX.r3.2HG0128300
HORVU.MOREX.r3.1HG0024980	HORVU.MOREX.r3.7HG0677270	HORVU.MOREX.r3.6HG0556810	HORVU.MOREX.r3.4HG0418350	HORVU.MOREX.r3.3HG0308310	HORVU.MOREX.r3.2HG0186860	HORVU.MOREX.r3.2HG0128310
HORVU.MOREX.r3.1HG0024990	HORVU.MOREX.r3.7HG0677280	HORVU.MOREX.r3.6HG0556820	HORVU.MOREX.r3.4HG0418360	HORVU.MOREX.r3.3HG0308350	HORVU.MOREX.r3.2HG0186870	HORVU.MOREX.r3.2HG0128320
HORVU.MOREX.r3.1HG0025010	HORVU.MOREX.r3.7HG0677290	HORVU.MOREX.r3.6HG0556870	HORVU.MOREX.r3.4HG0418370	HORVU.MOREX.r3.3HG0308360	HORVU.MOREX.r3.2HG0186940	HORVU.MOREX.r3.2HG0128340
HORVU.MOREX.r3.1HG0025050	HORVU.MOREX.r3.7HG0677360	HORVU.MOREX.r3.6HG0556880	HORVU.MOREX.r3.4HG0418400	HORVU.MOREX.r3.3HG0308370	HORVU.MOREX.r3.2HG0186970	HORVU.MOREX.r3.2HG0128360
HORVU.MOREX.r3.1HG0025060	HORVU.MOREX.r3.7HG0677370	HORVU.MOREX.r3.6HG0556980	HORVU.MOREX.r3.4HG0418410	HORVU.MOREX.r3.3HG0308410	HORVU.MOREX.r3.2HG0186980	HORVU.MOREX.r3.2HG0128410
HORVU.MOREX.r3.1HG0025100	HORVU.MOREX.r3.7HG0677380	HORVU.MOREX.r3.6HG0556990	HORVU.MOREX.r3.4HG0418420	HORVU.MOREX.r3.3HG0308420	HORVU.MOREX.r3.2HG0187000	HORVU.MOREX.r3.2HG0128430
HORVU.MOREX.r3.1HG0025110	HORVU.MOREX.r3.7HG0677390	HORVU.MOREX.r3.6HG0557000	HORVU.MOREX.r3.4HG0418430	HORVU.MOREX.r3.3HG0308430	HORVU.MOREX.r3.2HG0187010	HORVU.MOREX.r3.2HG0128480
HORVU.MOREX.r3.1HG0025150	HORVU.MOREX.r3.7HG0677410	HORVU.MOREX.r3.6HG0557020	HORVU.MOREX.r3.4HG0418440	HORVU.MOREX.r3.3HG0308450	HORVU.MOREX.r3.2HG0187030	HORVU.MOREX.r3.2HG0128490
HORVU.MOREX.r3.1HG0025200	HORVU.MOREX.r3.7HG0677440	HORVU.MOREX.r3.6HG0557060	HORVU.MOREX.r3.4HG0418460	HORVU.MOREX.r3.3HG0308460	HORVU.MOREX.r3.2HG0187050	HORVU.MOREX.r3.2HG0128500
HORVU.MOREX.r3.1HG0025230	HORVU.MOREX.r3.7HG0677450	HORVU.MOREX.r3.6HG0557070	HORVU.MOREX.r3.4HG0418470	HORVU.MOREX.r3.3HG0308480	HORVU.MOREX.r3.2HG0187080	HORVU.MOREX.r3.2HG0128530
HORVU.MOREX.r3.1HG0025320	HORVU.MOREX.r3.7HG0677460	HORVU.MOREX.r3.6HG0557080	HORVU.MOREX.r3.4HG0418480	HORVU.MOREX.r3.3HG0308510	HORVU.MOREX.r3.2HG0187090	HORVU.MOREX.r3.2HG0128540
HORVU.MOREX.r3.1HG0025340	HORVU.MOREX.r3.7HG0677480	HORVU.MOREX.r3.6HG0557120	HORVU.MOREX.r3.4HG0418520	HORVU.MOREX.r3.3HG0308520	HORVU.MOREX.r3.2HG0187100	HORVU.MOREX.r3.2HG0128550
HORVU.MOREX.r3.1HG0025350	HORVU.MOREX.r3.7HG0677510	HORVU.MOREX.r3.6HG0557130	HORVU.MOREX.r3.4HG0418530	HORVU.MOREX.r3.3HG0308530	HORVU.MOREX.r3.2HG0187120	HORVU.MOREX.r3.2HG0128600
HORVU.MOREX.r3.1HG0025440	HORVU.MOREX.r3.7HG0677520	HORVU.MOREX.r3.6HG0557140	HORVU.MOREX.r3.4HG0418540	HORVU.MOREX.r3.3HG0308540	HORVU.MOREX.r3.2HG0187130	HORVU.MOREX.r3.2HG0128630
HORVU.MOREX.r3.1HG0025460	HORVU.MOREX.r3.7HG0677540	HORVU.MOREX.r3.6HG0557160	HORVU.MOREX.r3.4HG0418560	HORVU.MOREX.r3.3HG0308560	HORVU.MOREX.r3.2HG0187140	HORVU.MOREX.r3.2HG0128640
HORVU.MOREX.r3.1HG0025500	HORVU.MOREX.r3.7HG0677550	HORVU.MOREX.r3.6HG0557190	HORVU.MOREX.r3.4HG0418580	HORVU.MOREX.r3.3HG0308570	HORVU.MOREX.r3.2HG0187170	HORVU.MOREX.r3.2HG0128680
HORVU.MOREX.r3.1HG0025510	HORVU.MOREX.r3.7HG0677570	HORVU.MOREX.r3.6HG0557230	HORVU.MOREX.r3.4HG0418600	HORVU.MOREX.r3.3HG0308580	HORVU.MOREX.r3.2HG0187210	HORVU.MOREX.r3.2HG0128700
HORVU.MOREX.r3.1HG0025520	HORVU.MOREX.r3.7HG0677580	HORVU.MOREX.r3.6HG0557260	HORVU.MOREX.r3.4HG0418610	HORVU.MOREX.r3.3HG0308590	HORVU.MOREX.r3.2HG0187360	HORVU.MOREX.r3.2HG0123220
HORVU.MOREX.r3.1HG0025530	HORVU.MOREX.r3.7HG0677600	HORVU.MOREX.r3.6HG0557280	HORVU.MOREX.r3.4HG0418620	HORVU.MOREX.r3.3HG0308620	HORVU.MOREX.r3.2HG0187430	HORVU.MOREX.r3.2HG0120350
HORVU.MOREX.r3.1HG0025550	HORVU.MOREX.r3.7HG0677610	HORVU.MOREX.r3.6HG0557290	HORVU.MOREX.r3.4HG0418630	HORVU.MOREX.r3.3HG0308630	HORVU.MOREX.r3.2HG0187440	HORVU.MOREX.r3.2HG0120360
HORVU.MOREX.r3.1HG0025580	HORVU.MOREX.r3.7HG0677630	HORVU.MOREX.r3.6HG0557340	HORVU.MOREX.r3.4HG0418640	HORVU.MOREX.r3.3HG0308640	HORVU.MOREX.r3.2HG0187450	HORVU.MOREX.r3.2HG0120370
HORVU.MOREX.r3.1HG0025590	HORVU.MOREX.r3.7HG0677640	HORVU.MOREX.r3.6HG0557400	HORVU.MOREX.r3.4HG0418650	HORVU.MOREX.r3.3HG0308660	HORVU.MOREX.r3.2HG0187460	HORVU.MOREX.r3.2HG0120380
HORVU.MOREX.r3.1HG0025600	HORVU.MOREX.r3.7HG0677710	HORVU.MOREX.r3.6HG0557410	HORVU.MOREX.r3.4HG0418660	HORVU.MOREX.r3.3HG0308720	HORVU.MOREX.r3.2HG0187470	HORVU.MOREX.r3.2HG0120400
HORVU.MOREX.r3.1HG0025620	HORVU.MOREX.r3.7HG0677750	HORVU.MOREX.r3.6HG0557420	HORVU.MOREX.r3.4HG0418670	HORVU.MOREX.r3.3HG0308740	HORVU.MOREX.r3.2HG0187500	HORVU.MOREX.r3.2HG0120410
HORVU.MOREX.r3.1HG0025660	HORVU.MOREX.r3.7HG0677770	HORVU.MOREX.r3.6HG0557440	HORVU.MOREX.r3.4HG0418680	HORVU.MOREX.r3.3HG0308770	HORVU.MOREX.r3.2HG0187530	HORVU.MOREX.r3.2HG0120420
HORVU.MOREX.r3.1HG0025690	HORVU.MOREX.r3.7HG0677780	HORVU.MOREX.r3.6HG0557460	HORVU.MOREX.r3.4HG0418700	HORVU.MOREX.r3.3HG0308780	HORVU.MOREX.r3.2HG0187540	HORVU.MOREX.r3.2HG0120470
HORVU.MOREX.r3.1HG0025720	HORVU.MOREX.r3.7HG0677790	HORVU.MOREX.r3.6HG0557480	HORVU.MOREX.r3.4HG0418710	HORVU.MOREX.r3.3HG0308800	HORVU.MOREX.r3.2HG0187550	HORVU.MOREX.r3.2HG0120480
HORVU.MOREX.r3.1HG0025730	HORVU.MOREX.r3.7HG0677800	HORVU.MOREX.r3.6HG0557490	HORVU.MOREX.r3.4HG0418720	HORVU.MOREX.r3.3HG0308810	HORVU.MOREX.r3.2HG0187560	HORVU.MOREX.r3.2HG0120490
HORVU.MOREX.r3.1HG0025750	HORVU.MOREX.r3.7HG0677820	HORVU.MOREX.r3.6HG0557550	HORVU.MOREX.r3.4HG0418760	HORVU.MOREX.r3.3HG0308820	HORVU.MOREX.r3.2HG0187570	HORVU.MOREX.r3.2HG0120510
HORVU.MOREX.r3.1HG0025790	HORVU.MOREX.r3.7HG0677850	HORVU.MOREX.r3.6HG0557570	HORVU.MOREX.r3.4HG0418770	HORVU.MOREX.r3.3HG0308830	HORVU.MOREX.r3.2HG0187590	HORVU.MOREX.r3.2HG0120560
HORVU.MOREX.r3.1HG0025810	HORVU.MOREX.r3.7HG0677860	HORVU.MOREX.r3.6HG0557590	HORVU.MOREX.r3.4HG0418780	HORVU.MOREX.r3.3HG0308840	HORVU.MOREX.r3.2HG0187610	HORVU.MOREX.r3.2HG0120570
HORVU.MOREX.r3.1HG0025820	HORVU.MOREX.r3.7HG0677870	HORVU.MOREX.r3.6HG0557610	HORVU.MOREX.r3.4HG0418790	HORVU.MOREX.r3.3HG0308890	HORVU.MOREX.r3.2HG0187620	HORVU.MOREX.r3.2HG0120580
HORVU.MOREX.r3.1HG0025840	HORVU.MOREX.r3.7HG0677890	HORVU.MOREX.r3.6HG0557620	HORVU.MOREX.r3.4HG0418800	HORVU.MOREX.r3.3HG0308900	HORVU.MOREX.r3.2HG0187630	HORVU.MOREX.r3.2HG0120590
HORVU.MOREX.r3.1HG0025870	HORVU.MOREX.r3.7HG0677930	HORVU.MOREX.r3.6HG0557640	HORVU.MOREX.r3.4HG0418810	HORVU.MOREX.r3.3HG0308910	HORVU.MOREX.r3.2HG0187640	HORVU.MOREX.r3.2HG0120610
HORVU.MOREX.r3.1HG0025880	HORVU.MOREX.r3.7HG0677940	HORVU.MOREX.r3.6HG0557690	HORVU.MOREX.r3.4HG0418820	HORVU.MOREX.r3.3HG0308930	HORVU.MOREX.r3.2HG0187650	HORVU.MOREX.r3.2HG0120650
HORVU.MOREX.r3.1HG0025890	HORVU.MOREX.r3.7HG0677960	HORVU.MOREX.r3.6HG0557700	HORVU.MOREX.r3.4HG0418830	HORVU.MOREX.r3.3HG0308950	HORVU.MOREX.r3.2HG0187660	HORVU.MOREX.r3.2HG0120670
HORVU.MOREX.r3.1HG0025900	HORVU.MOREX.r3.7HG0677990	HORVU.MOREX.r3.6HG0557740	HORVU.MOREX.r3.4HG0418840	HORVU.MOREX.r3.3HG0308960	HORVU.MOREX.r3.2HG0187680	HORVU.MOREX.r3.2HG0120700
HORVU.MOREX.r3.1HG0025910	HORVU.MOREX.r3.7HG0678020	HORVU.MOREX.r3.6HG0557750	HORVU.MOREX.r3.4HG0418850	HORVU.MOREX.r3.3HG0308970	HORVU.MOREX.r3.2HG0187690	HORVU.MOREX.r3.2HG0120710
HORVU.MOREX.r3.1HG0025960	HORVU.MOREX.r3.7HG0678040	HORVU.MOREX.r3.6HG0557770	HORVU.MOREX.r3.4HG0418860	HORVU.MOREX.r3.3HG0308980	HORVU.MOREX.r3.2HG0187760	HORVU.MOREX.r3.2HG0120720
HORVU.MOREX.r3.1HG0025970	HORVU.MOREX.r3.7HG0678080	HORVU.MOREX.r3.6HG0557780	HORVU.MOREX.r3.4HG0418870	HORVU.MOREX.r3.3HG0308990	HORVU.MOREX.r3.2HG0187780	HORVU.MOREX.r3.2HG0120760
HORVU.MOREX.r3.1HG0025980	HORVU.MOREX.r3.7HG0678090	HORVU.MOREX.r3.6HG0557830	HORVU.MOREX.r3.4HG0418880	HORVU.MOREX.r3.3HG0309000	HORVU.MOREX.r3.2HG0187800	HORVU.MOREX.r3.2HG0120820
HORVU.MOREX.r3.1HG0025990	HORVU.MOREX.r3.7HG0678110	HORVU.MOREX.r3.6HG0557860	HORVU.MOREX.r3.4HG0418890	HORVU.MOREX.r3.3HG0309010	HORVU.MOREX.r3.2HG0187810	HORVU.MOREX.r3.2HG0120830
HORVU.MOREX.r3.1HG0026010	HORVU.MOREX.r3.7HG0678130	HORVU.MOREX.r3.6HG0557880	HORVU.MOREX.r3.4HG0418900	HORVU.MOREX.r3.3HG0309050	HORVU.MOREX.r3.2HG0187820	HORVU.MOREX.r3.2HG0120840
HORVU.MOREX.r3.1HG0026020	HORVU.MOREX.r3.7HG0678140	HORVU.MOREX.r3.6HG0557890	HORVU.MOREX.r3.4HG0418910	HORVU.MOREX.r3.3HG0309060	HORVU.MOREX.r3.2HG0187830	HORVU.MOREX.r3.2HG0120870
HORVU.MOREX.r3.1HG0026030	HORVU.MOREX.r3.7HG0678160	HORVU.MOREX.r3.6HG0557900	HORVU.MOREX.r3.4HG0418920	HORVU.MOREX.r3.3HG0309080	HORVU.MOREX.r3.2HG0187850	HORVU.MOREX.r3.2HG0120880
HORVU.MOREX.r3.1HG0026070	HORVU.MOREX.r3.7HG0678170	HORVU.MOREX.r3.6HG0557910	HORVU.MOREX.r3.4HG0418930	HORVU.MOREX.r3.3HG0309090	HORVU.MOREX.r3.2HG0187860	HORVU.MOREX.r3.2HG0120900
HORVU.MOREX.r3.1HG0026080	HORVU.MOREX.r3.7HG0678180	HORVU.MOREX.r3.6HG0557920	HORVU.MOREX.r3.4HG0418940	HORVU.MOREX.r3.3HG0309110	HORVU.MOREX.r3.2HG0187870	HORVU.MOREX.r3.2HG0120910
HORVU.MOREX.r3.1HG0026100	HORVU.MOREX.r3.7HG0678190	HORVU.MOREX.r3.6HG0557930	HORVU.MOREX.r3.4HG0418950	HORVU.MOREX.r3.3HG0309130	HORVU.MOREX.r3.2HG0187880	HORVU.MOREX.r3.2HG0120950
HORVU.MOREX.r3.1HG0026110	HORVU.MOREX.r3.7HG0678200	HORVU.MOREX.r3.6HG0557950	HORVU.MOREX.r3.4HG0418960	HORVU.MOREX.r3.3HG0309140	HORVU.MOREX.r3.2HG0187890	HORVU.MOREX.r3.2HG0120980
HORVU.MOREX.r3.1HG0026140	HORVU.MOREX.r3.7HG0678210	HORVU.MOREX.r3.6HG0557970	HORVU.MOREX.r3.4HG0418970	HORVU.MOREX.r3.3HG0309150	HORVU.MOREX.r3.2HG0187900	HORVU.MOREX.r3.2HG0121000
HORVU.MOREX.r3.1HG0026170	HORVU.MOREX.r3.7HG0678220	HORVU.MOREX.r3.6HG0557980	HORVU.MOREX.r3.4HG0418980	HORVU.MOREX.r3.3HG0309170	HORVU.MOREX.r3.2HG0187910	HORVU.MOREX.r3.2HG0121010
HORVU.MOREX.r3.1HG0026180	HORVU.MOREX.r3.7HG0678230	HORVU.MOREX.r3.6HG0558040	HORVU.MOREX.r3.4HG0418990	HORVU.MOREX.r3.3HG0309190	HORVU.MOREX.r3.2HG0187920	HORVU.MOREX.r3.2HG0121110
HORVU.MOREX.r3.1HG0026190	HORVU.MOREX.r3.7HG0678240	HORVU.MOREX.r3.6HG0558080	HORVU.MOREX.r3.4HG0419000	HORVU.MOREX.r3.3HG0309200	HORVU.MOREX.r3.2HG0187930	HORVU.MOREX.r3.2HG0121120
HORVU.MOREX.r3.1HG0026220	HORVU.MOREX.r3.7HG0678290	HORVU.MOREX.r3.6HG0558090	HORVU.MOREX.r3.4HG0419010	HORVU.MOREX.r3.3HG0309210	HORVU.MOREX.r3.2HG0187940	HORVU.MOREX.r3.2HG0121130
HORVU.MOREX.r3.1HG0026230	HORVU.MOREX.r3.7HG0678310	HORVU.MOREX.r3.6HG0558100	HORVU.MOREX.r3.4HG0419020	HORVU.MOREX.r3.3HG0309220	HORVU.MOREX.r3.2HG0187970	HORVU.MOREX.r3.2HG0121170
HORVU.MOREX.r3.1HG0026240	HORVU.MOREX.r3.7HG0678320	HORVU.MOREX.r3.6HG0558110	HORVU.MOREX.r3.4HG0419030	HORVU.MOREX.r3.3HG0309240	HORVU.MOREX.r3.2HG0187980	HORVU.MOREX.r3.2HG0121180
HORVU.MOREX.r3.1HG0026280	HORVU.MOREX.r3.7HG0678330	HORVU.MOREX.r3.6HG0558120	HORVU.MOREX.r3.4HG0419050	HORVU.MOREX.r3.3HG0309260	HORVU.MOREX.r3.2HG0187990	HORVU.MOREX.r3.2HG0121200
HORVU.MOREX.r3.1HG0026300	HORVU.MOREX.r3.7HG0678430	HORVU.MOREX.r3.6HG0558170	HORVU.MOREX.r3.4HG0419070	HORVU.MOREX.r3.3HG0309270	HORVU.MOREX.r3.2HG0188000	HORVU.MOREX.r3.2HG0121290
HORVU.MOREX.r3.1HG0026350	HORVU.MOREX.r3.7HG0678440	HORVU.MOREX.r3.6HG0558180	HORVU.MOREX.r3.4HG0419090	HORVU.MOREX.r3.3HG0309280	HORVU.MOREX.r3.2HG0188010	HORVU.MOREX.r3.2HG0121300
HORVU.MOREX.r3.1HG0026380	HORVU.MOREX.r3.7HG0678460	HORVU.MOREX.r3.6HG0558220	HORVU.MOREX.r3.4HG0419100	HORVU.MOREX.r3.3HG0309300	HORVU.MOREX.r3.2HG0188020	HORVU.MOREX.r3.2HG0121310
HORVU.MOREX.r3.1HG0026390	HORVU.MOREX.r3.7HG0678490	HORVU.MOREX.r3.6HG0558240	HORVU.MOREX.r3.4HG0419120	HORVU.MOREX.r3.3HG0309330	HORVU.MOREX.r3.2HG0188030	HORVU.MOREX.r3.2HG0121320
HORVU.MOREX.r3.1HG0026420	HORVU.MOREX.r3.7HG0678520	HORVU.MOREX.r3.6HG0558250	HORVU.MOREX.r3.4HG0419130	HORVU.MOREX.r3.3HG0309340	HORVU.MOREX.r3.2HG0188040	HORVU.MOREX.r3.2HG0121350
HORVU.MOREX.r3.1HG0026430	HORVU.MOREX.r3.7HG0678530	HORVU.MOREX.r3.6HG0558260	HORVU.MOREX.r3.4HG0419140	HORVU.MOREX.r3.3HG0309350	HORVU.MOREX.r3.2HG0188050	HORVU.MOREX.r3.2HG0121370
HORVU.MOREX.r3.1HG0026440	HORVU.MOREX.r3.7HG0678560	HORVU.MOREX.r3.6HG0558280	HORVU.MOREX.r3.4HG0419150	HORVU.MOREX.r3.3HG0309360	HORVU.MOREX.r3.2HG0188060	HORVU.MOREX.r3.2HG0121430
HORVU.MOREX.r3.1HG0026470	HORVU.MOREX.r3.7HG0678590	HORVU.MOREX.r3.6HG0558300	HORVU.MOREX.r3.4HG0419170	HORVU.MOREX.r3.3HG0309380	HORVU.MOREX.r3.2HG0188070	HORVU.MOREX.r3.2HG0121450
HORVU.MOREX.r3.1HG0026520	HORVU.MOREX.r3.7HG0678620	HORVU.MOREX.r3.6HG0558310	HORVU.MOREX.r3.4HG0419180	HORVU.MOREX.r3.3HG0309400	HORVU.MOREX.r3.2HG0188080	HORVU.MOREX.r3.2HG0121480
HORVU.MOREX.r3.1HG0026530	HORVU.MOREX.r3.7HG0678630	HORVU.MOREX.r3.6HG0558320	HORVU.MOREX.r3.4HG0419200	HORVU.MOREX.r3.3HG0309410	HORVU.MOREX.r3.2HG0188090	HORVU.MOREX.r3.3HG0269650
HORVU.MOREX.r3.1HG0026570	HORVU.MOREX.r3.7HG0678660	HORVU.MOREX.r3.6HG0558330	HORVU.MOREX.r3.4HG0419220	HORVU.MOREX.r3.3HG0309460	HORVU.MOREX.r3.2HG0188110	HORVU.MOREX.r3.3HG0269660
HORVU.MOREX.r3.1HG0026580	HORVU.MOREX.r3.7HG0678680	HORVU.MOREX.r3.6HG0558350	HORVU.MOREX.r3.4HG0419230	HORVU.MOREX.r3.3HG0309470	HORVU.MOREX.r3.2HG0188120	HORVU.MOREX.r3.3HG0269680
HORVU.MOREX.r3.1HG0026590	HORVU.MOREX.r3.7HG0678690	HORVU.MOREX.r3.6HG0558360	HORVU.MOREX.r3.4HG0419240	HORVU.MOREX.r3.3HG0309490	HORVU.MOREX.r3.2HG0188130	HORVU.MOREX.r3.3HG0269730
HORVU.MOREX.r3.1HG0026630	HORVU.MOREX.r3.7HG0678750	HORVU.MOREX.r3.6HG0558370	HORVU.MOREX.r3.4HG0419250	HORVU.MOREX.r3.3HG0309500	HORVU.MOREX.r3.2HG0188160	HORVU.MOREX.r3.3HG0269760
HORVU.MOREX.r3.1HG0026640	HORVU.MOREX.r3.7HG0678790	HORVU.MOREX.r3.6HG0558390	HORVU.MOREX.r3.4HG0419260	HORVU.MOREX.r3.3HG0309510	HORVU.MOREX.r3.2HG0188170	HORVU.MOREX.r3.3HG0269810
HORVU.MOREX.r3.1HG0026650	HORVU.MOREX.r3.7HG0678810	HORVU.MOREX.r3.6HG0558410	HORVU.MOREX.r3.4HG0419270	HORVU.MOREX.r3.3HG0309520	HORVU.MOREX.r3.2HG0188190	HORVU.MOREX.r3.3HG0269840
HORVU.MOREX.r3.1HG0026660	HORVU.MOREX.r3.7HG0678820	HORVU.MOREX.r3.6HG0558430	HORVU.MOREX.r3.4HG0419280	HORVU.MOREX.r3.3HG0309530	HORVU.MOREX.r3.2HG0188200	HORVU.MOREX.r3.3HG0269850
HORVU.MOREX.r3.1HG0026720	HORVU.MOREX.r3.7HG0678830	HORVU.MOREX.r3.6HG0558440	HORVU.MOREX.r3.4HG0419290	HORVU.MOREX.r3.3HG0309540	HORVU.MOREX.r3.2HG0188210	HORVU.MOREX.r3.3HG0269860
HORVU.MOREX.r3.1HG0026750	HORVU.MOREX.r3.7HG0678840	HORVU.MOREX.r3.6HG0558450	HORVU.MOREX.r3.4HG0419300	HORVU.MOREX.r3.3HG0309550	HORVU.MOREX.r3.2HG0188220	HORVU.MOREX.r3.3HG0269870
HORVU.MOREX.r3.1HG0026830	HORVU.MOREX.r3.7HG0678860	HORVU.MOREX.r3.6HG0558460	HORVU.MOREX.r3.4HG0419310	HORVU.MOREX.r3.3HG0309560	HORVU.MOREX.r3.2HG0188230	HORVU.MOREX.r3.3HG0269890
HORVU.MOREX.r3.1HG0026860	HORVU.MOREX.r3.7HG0678890	HORVU.MOREX.r3.6HG0558490	HORVU.MOREX.r3.4HG0419320	HORVU.MOREX.r3.3HG0309570	HORVU.MOREX.r3.2HG0188270	HORVU.MOREX.r3.3HG0269900
HORVU.MOREX.r3.1HG0026870	HORVU.MOREX.r3.7HG0678920	HORVU.MOREX.r3.6HG0558500	HORVU.MOREX.r3.4HG0419340	HORVU.MOREX.r3.3HG0309580	HORVU.MOREX.r3.2HG0188290	HORVU.MOREX.r3.3HG0269910
HORVU.MOREX.r3.1HG0026900	HORVU.MOREX.r3.7HG0678940	HORVU.MOREX.r3.6HG0558520	HORVU.MOREX.r3.4HG0419360	HORVU.MOREX.r3.3HG0309590	HORVU.MOREX.r3.2HG0188300	HORVU.MOREX.r3.3HG0269930
HORVU.MOREX.r3.1HG0026930	HORVU.MOREX.r3.7HG0678960	HORVU.MOREX.r3.6HG0558530	HORVU.MOREX.r3.4HG0419370	HORVU.MOREX.r3.3HG0309610	HORVU.MOREX.r3.2HG0188310	HORVU.MOREX.r3.3HG0269960
HORVU.MOREX.r3.1HG0026940	HORVU.MOREX.r3.7HG0678990	HORVU.MOREX.r3.6HG0558540	HORVU.MOREX.r3.4HG0419390	HORVU.MOREX.r3.3HG0309620	HORVU.MOREX.r3.2HG0188320	HORVU.MOREX.r3.3HG0270040
HORVU.MOREX.r3.1HG0026950	HORVU.MOREX.r3.7HG0679050	HORVU.MOREX.r3.6HG0558550	HORVU.MOREX.r3.4HG0419410	HORVU.MOREX.r3.3HG0309630	HORVU.MOREX.r3.2HG0188370	HORVU.MOREX.r3.3HG0270050
HORVU.MOREX.r3.1HG0026960	HORVU.MOREX.r3.7HG0679060	HORVU.MOREX.r3.6HG0558580	HORVU.MOREX.r3.4HG0419440	HORVU.MOREX.r3.3HG0309650	HORVU.MOREX.r3.2HG0188380	HORVU.MOREX.r3.3HG0270100
HORVU.MOREX.r3.1HG0027000	HORVU.MOREX.r3.7HG0679100	HORVU.MOREX.r3.6HG0558620	HORVU.MOREX.r3.4HG0419450	HORVU.MOREX.r3.3HG0309660	HORVU.MOREX.r3.2HG0188410	HORVU.MOREX.r3.3HG0270160
HORVU.MOREX.r3.1HG0027030	HORVU.MOREX.r3.7HG0679130	HORVU.MOREX.r3.6HG0558630	HORVU.MOREX.r3.4HG0419460	HORVU.MOREX.r3.3HG0309700	HORVU.MOREX.r3.2HG0188420	HORVU.MOREX.r3.3HG0270190
HORVU.MOREX.r3.1HG0027040	HORVU.MOREX.r3.7HG0679170	HORVU.MOREX.r3.6HG0558640	HORVU.MOREX.r3.5HG0419470	HORVU.MOREX.r3.3HG0309720	HORVU.MOREX.r3.2HG0188430	HORVU.MOREX.r3.3HG0270240
HORVU.MOREX.r3.1HG0027050	HORVU.MOREX.r3.7HG0679180	HORVU.MOREX.r3.6HG0558690	HORVU.MOREX.r3.5HG0419480	HORVU.MOREX.r3.3HG0309730	HORVU.MOREX.r3.2HG0188440	HORVU.MOREX.r3.3HG0270250
HORVU.MOREX.r3.1HG0027080	HORVU.MOREX.r3.7HG0679220	HORVU.MOREX.r3.6HG0558740	HORVU.MOREX.r3.5HG0419500	HORVU.MOREX.r3.3HG0309760	HORVU.MOREX.r3.2HG0188500	HORVU.MOREX.r3.3HG0270260
HORVU.MOREX.r3.1HG0027090	HORVU.MOREX.r3.7HG0679310	HORVU.MOREX.r3.6HG0558760	HORVU.MOREX.r3.5HG0419520	HORVU.MOREX.r3.3HG0309780	HORVU.MOREX.r3.2HG0188520	HORVU.MOREX.r3.3HG0270270
HORVU.MOREX.r3.1HG0027120	HORVU.MOREX.r3.7HG0679350	HORVU.MOREX.r3.6HG0558770	HORVU.MOREX.r3.5HG0419530	HORVU.MOREX.r3.3HG0309790	HORVU.MOREX.r3.2HG0188580	HORVU.MOREX.r3.3HG0270290
HORVU.MOREX.r3.1HG0027140	HORVU.MOREX.r3.7HG0679360	HORVU.MOREX.r3.6HG0558800	HORVU.MOREX.r3.5HG0419540	HORVU.MOREX.r3.3HG0309800	HORVU.MOREX.r3.2HG0188620	HORVU.MOREX.r3.3HG0270300
HORVU.MOREX.r3.1HG0027150	HORVU.MOREX.r3.7HG0679390	HORVU.MOREX.r3.6HG0558810	HORVU.MOREX.r3.5HG0419550	HORVU.MOREX.r3.3HG0309820	HORVU.MOREX.r3.2HG0188630	HORVU.MOREX.r3.3HG0270310
HORVU.MOREX.r3.1HG0027180	HORVU.MOREX.r3.7HG0679410	HORVU.MOREX.r3.6HG0558830	HORVU.MOREX.r3.5HG0419570	HORVU.MOREX.r3.3HG0309850	HORVU.MOREX.r3.2HG0188640	HORVU.MOREX.r3.3HG0270320
HORVU.MOREX.r3.1HG0027190	HORVU.MOREX.r3.7HG0679430	HORVU.MOREX.r3.6HG0558840	HORVU.MOREX.r3.5HG0419590	HORVU.MOREX.r3.3HG0309870	HORVU.MOREX.r3.2HG0188650	HORVU.MOREX.r3.3HG0270400
HORVU.MOREX.r3.1HG0027200	HORVU.MOREX.r3.7HG0679440	HORVU.MOREX.r3.6HG0558870	HORVU.MOREX.r3.5HG0419600	HORVU.MOREX.r3.3HG0309880	HORVU.MOREX.r3.2HG0188660	HORVU.MOREX.r3.3HG0270410
HORVU.MOREX.r3.1HG0027220	HORVU.MOREX.r3.7HG0679460	HORVU.MOREX.r3.6HG0558880	HORVU.MOREX.r3.5HG0419610	HORVU.MOREX.r3.3HG0309890	HORVU.MOREX.r3.2HG0188670	HORVU.MOREX.r3.3HG0270430
HORVU.MOREX.r3.1HG0027280	HORVU.MOREX.r3.7HG0679480	HORVU.MOREX.r3.6HG0558930	HORVU.MOREX.r3.5HG0419640	HORVU.MOREX.r3.3HG0309900	HORVU.MOREX.r3.2HG0188700	HORVU.MOREX.r3.3HG0270450
HORVU.MOREX.r3.1HG0027330	HORVU.MOREX.r3.7HG0679520	HORVU.MOREX.r3.6HG0558970	HORVU.MOREX.r3.5HG0419660	HORVU.MOREX.r3.3HG0309910	HORVU.MOREX.r3.2HG0188710	HORVU.MOREX.r3.3HG0270460
HORVU.MOREX.r3.1HG0027350	HORVU.MOREX.r3.7HG0679540	HORVU.MOREX.r3.6HG0559000	HORVU.MOREX.r3.5HG0419680	HORVU.MOREX.r3.3HG0309920	HORVU.MOREX.r3.2HG0188750	HORVU.MOREX.r3.3HG0270500
HORVU.MOREX.r3.1HG0027360	HORVU.MOREX.r3.7HG0679550	HORVU.MOREX.r3.6HG0559010	HORVU.MOREX.r3.5HG0419700	HORVU.MOREX.r3.3HG0309930	HORVU.MOREX.r3.2HG0188760	HORVU.MOREX.r3.3HG0270520
HORVU.MOREX.r3.1HG0027380	HORVU.MOREX.r3.7HG0679560	HORVU.MOREX.r3.6HG0559070	HORVU.MOREX.r3.5HG0419720	HORVU.MOREX.r3.3HG0309940	HORVU.MOREX.r3.2HG0188770	HORVU.MOREX.r3.3HG0270530
HORVU.MOREX.r3.1HG0027400	HORVU.MOREX.r3.7HG0679570	HORVU.MOREX.r3.6HG0559110	HORVU.MOREX.r3.5HG0419740	HORVU.MOREX.r3.3HG0309960	HORVU.MOREX.r3.2HG0188780	HORVU.MOREX.r3.3HG0270540
HORVU.MOREX.r3.1HG0027460	HORVU.MOREX.r3.7HG0679600	HORVU.MOREX.r3.6HG0559130	HORVU.MOREX.r3.5HG0419750	HORVU.MOREX.r3.3HG0310010	HORVU.MOREX.r3.2HG0188790	HORVU.MOREX.r3.3HG0270610
HORVU.MOREX.r3.1HG0027490	HORVU.MOREX.r3.7HG0679610	HORVU.MOREX.r3.6HG0559140	HORVU.MOREX.r3.5HG0419760	HORVU.MOREX.r3.3HG0310040	HORVU.MOREX.r3.2HG0188800	HORVU.MOREX.r3.3HG0270620
HORVU.MOREX.r3.1HG0027520	HORVU.MOREX.r3.7HG0679650	HORVU.MOREX.r3.6HG0559160	HORVU.MOREX.r3.5HG0419770	HORVU.MOREX.r3.3HG0310060	HORVU.MOREX.r3.2HG0188810	HORVU.MOREX.r3.3HG0270650
HORVU.MOREX.r3.1HG0027530	HORVU.MOREX.r3.7HG0679710	HORVU.MOREX.r3.6HG0559180	HORVU.MOREX.r3.5HG0419780	HORVU.MOREX.r3.3HG0310070	HORVU.MOREX.r3.2HG0188820	HORVU.MOREX.r3.3HG0270660
HORVU.MOREX.r3.1HG0027560	HORVU.MOREX.r3.7HG0679760	HORVU.MOREX.r3.6HG0559190	HORVU.MOREX.r3.5HG0419790	HORVU.MOREX.r3.3HG0310080	HORVU.MOREX.r3.2HG0188850	HORVU.MOREX.r3.3HG0270670
HORVU.MOREX.r3.1HG0027590	HORVU.MOREX.r3.7HG0679770	HORVU.MOREX.r3.6HG0559200	HORVU.MOREX.r3.5HG0419800	HORVU.MOREX.r3.3HG0310090	HORVU.MOREX.r3.2HG0188860	HORVU.MOREX.r3.3HG0270710
HORVU.MOREX.r3.1HG0027640	HORVU.MOREX.r3.7HG0679780	HORVU.MOREX.r3.6HG0559230	HORVU.MOREX.r3.5HG0419820	HORVU.MOREX.r3.3HG0310110	HORVU.MOREX.r3.2HG0188890	HORVU.MOREX.r3.3HG0270720
HORVU.MOREX.r3.1HG0027650	HORVU.MOREX.r3.7HG0679800	HORVU.MOREX.r3.6HG0559240	HORVU.MOREX.r3.5HG0419830	HORVU.MOREX.r3.3HG0310140	HORVU.MOREX.r3.2HG0188900	HORVU.MOREX.r3.3HG0270730
HORVU.MOREX.r3.1HG0027680	HORVU.MOREX.r3.7HG0679820	HORVU.MOREX.r3.6HG0559310	HORVU.MOREX.r3.5HG0419840	HORVU.MOREX.r3.3HG0310150	HORVU.MOREX.r3.2HG0188940	HORVU.MOREX.r3.3HG0270750
HORVU.MOREX.r3.1HG0027710	HORVU.MOREX.r3.7HG0679830	HORVU.MOREX.r3.6HG0559350	HORVU.MOREX.r3.5HG0419870	HORVU.MOREX.r3.3HG0310160	HORVU.MOREX.r3.2HG0188950	HORVU.MOREX.r3.3HG0270800
HORVU.MOREX.r3.1HG0027740	HORVU.MOREX.r3.7HG0679840	HORVU.MOREX.r3.6HG0559360	HORVU.MOREX.r3.5HG0419880	HORVU.MOREX.r3.3HG0310170	HORVU.MOREX.r3.2HG0188960	HORVU.MOREX.r3.3HG0270810
HORVU.MOREX.r3.1HG0027750	HORVU.MOREX.r3.7HG0679930	HORVU.MOREX.r3.6HG0559370	HORVU.MOREX.r3.5HG0419910	HORVU.MOREX.r3.3HG0310210	HORVU.MOREX.r3.2HG0188970	HORVU.MOREX.r3.3HG0270820
HORVU.MOREX.r3.1HG0027800	HORVU.MOREX.r3.7HG0679960	HORVU.MOREX.r3.6HG0559380	HORVU.MOREX.r3.5HG0419920	HORVU.MOREX.r3.3HG0310240	HORVU.MOREX.r3.2HG0189010	HORVU.MOREX.r3.3HG0270840
HORVU.MOREX.r3.1HG0027810	HORVU.MOREX.r3.7HG0679970	HORVU.MOREX.r3.6HG0559390	HORVU.MOREX.r3.5HG0419930	HORVU.MOREX.r3.3HG0310270	HORVU.MOREX.r3.2HG0189030	HORVU.MOREX.r3.3HG0270850
HORVU.MOREX.r3.1HG0027820	HORVU.MOREX.r3.7HG0679980	HORVU.MOREX.r3.6HG0559400	HORVU.MOREX.r3.5HG0419940	HORVU.MOREX.r3.3HG0310280	HORVU.MOREX.r3.2HG0189040	HORVU.MOREX.r3.3HG0270870
HORVU.MOREX.r3.1HG0027850	HORVU.MOREX.r3.7HG0679990	HORVU.MOREX.r3.6HG0559410	HORVU.MOREX.r3.5HG0419950	HORVU.MOREX.r3.3HG0310300	HORVU.MOREX.r3.2HG0189080	HORVU.MOREX.r3.3HG0270880
HORVU.MOREX.r3.1HG0027880	HORVU.MOREX.r3.7HG0680040	HORVU.MOREX.r3.6HG0559430	HORVU.MOREX.r3.5HG0419960	HORVU.MOREX.r3.3HG0310320	HORVU.MOREX.r3.2HG0189090	HORVU.MOREX.r3.3HG0270910
HORVU.MOREX.r3.1HG0027890	HORVU.MOREX.r3.7HG0680060	HORVU.MOREX.r3.6HG0559440	HORVU.MOREX.r3.5HG0419980	HORVU.MOREX.r3.3HG0310330	HORVU.MOREX.r3.2HG0189100	HORVU.MOREX.r3.3HG0270990
HORVU.MOREX.r3.1HG0027930	HORVU.MOREX.r3.7HG0680070	HORVU.MOREX.r3.6HG0559450	HORVU.MOREX.r3.5HG0420000	HORVU.MOREX.r3.3HG0310340	HORVU.MOREX.r3.2HG0189110	HORVU.MOREX.r3.3HG0271000
HORVU.MOREX.r3.1HG0027940	HORVU.MOREX.r3.7HG0680110	HORVU.MOREX.r3.6HG0559470	HORVU.MOREX.r3.5HG0420010	HORVU.MOREX.r3.3HG0310350	HORVU.MOREX.r3.2HG0189150	HORVU.MOREX.r3.3HG0271040
HORVU.MOREX.r3.1HG0027950	HORVU.MOREX.r3.7HG0680120	HORVU.MOREX.r3.6HG0559500	HORVU.MOREX.r3.5HG0420020	HORVU.MOREX.r3.3HG0310360	HORVU.MOREX.r3.2HG0189190	HORVU.MOREX.r3.3HG0271140
HORVU.MOREX.r3.1HG0028030	HORVU.MOREX.r3.7HG0680130	HORVU.MOREX.r3.6HG0559510	HORVU.MOREX.r3.5HG0420030	HORVU.MOREX.r3.3HG0310380	HORVU.MOREX.r3.2HG0189200	HORVU.MOREX.r3.3HG0271170
HORVU.MOREX.r3.1HG0028070	HORVU.MOREX.r3.7HG0680140	HORVU.MOREX.r3.6HG0559520	HORVU.MOREX.r3.5HG0420060	HORVU.MOREX.r3.3HG0310390	HORVU.MOREX.r3.2HG0189270	HORVU.MOREX.r3.3HG0271180
HORVU.MOREX.r3.1HG0028080	HORVU.MOREX.r3.7HG0680310	HORVU.MOREX.r3.6HG0559530	HORVU.MOREX.r3.5HG0420070	HORVU.MOREX.r3.3HG0310400	HORVU.MOREX.r3.2HG0189290	HORVU.MOREX.r3.3HG0271250
HORVU.MOREX.r3.1HG0028100	HORVU.MOREX.r3.7HG0680330	HORVU.MOREX.r3.6HG0559600	HORVU.MOREX.r3.5HG0420080	HORVU.MOREX.r3.3HG0310420	HORVU.MOREX.r3.2HG0189320	HORVU.MOREX.r3.3HG0271280
HORVU.MOREX.r3.1HG0028110	HORVU.MOREX.r3.7HG0680350	HORVU.MOREX.r3.6HG0559620	HORVU.MOREX.r3.5HG0420100	HORVU.MOREX.r3.3HG0310440	HORVU.MOREX.r3.2HG0189330	HORVU.MOREX.r3.3HG0271290
HORVU.MOREX.r3.1HG0028150	HORVU.MOREX.r3.7HG0680360	HORVU.MOREX.r3.6HG0559640	HORVU.MOREX.r3.5HG0420110	HORVU.MOREX.r3.3HG0310450	HORVU.MOREX.r3.2HG0189340	HORVU.MOREX.r3.3HG0271330
HORVU.MOREX.r3.1HG0028190	HORVU.MOREX.r3.7HG0680380	HORVU.MOREX.r3.6HG0559650	HORVU.MOREX.r3.5HG0420120	HORVU.MOREX.r3.3HG0310460	HORVU.MOREX.r3.2HG0189360	HORVU.MOREX.r3.3HG0271370
HORVU.MOREX.r3.1HG0028220	HORVU.MOREX.r3.7HG0680410	HORVU.MOREX.r3.6HG0559710	HORVU.MOREX.r3.5HG0420130	HORVU.MOREX.r3.3HG0310470	HORVU.MOREX.r3.2HG0189400	HORVU.MOREX.r3.3HG0271380
HORVU.MOREX.r3.1HG0028230	HORVU.MOREX.r3.7HG0680430	HORVU.MOREX.r3.6HG0559730	HORVU.MOREX.r3.5HG0420140	HORVU.MOREX.r3.3HG0310480	HORVU.MOREX.r3.2HG0189420	HORVU.MOREX.r3.3HG0271430
HORVU.MOREX.r3.1HG0028240	HORVU.MOREX.r3.7HG0680440	HORVU.MOREX.r3.6HG0559740	HORVU.MOREX.r3.5HG0420150	HORVU.MOREX.r3.3HG0310490	HORVU.MOREX.r3.2HG0189430	HORVU.MOREX.r3.3HG0271450
HORVU.MOREX.r3.1HG0028250	HORVU.MOREX.r3.7HG0680470	HORVU.MOREX.r3.6HG0559790	HORVU.MOREX.r3.5HG0420160	HORVU.MOREX.r3.3HG0310500	HORVU.MOREX.r3.2HG0189440	HORVU.MOREX.r3.3HG0271470
HORVU.MOREX.r3.1HG0028280	HORVU.MOREX.r3.7HG0680480	HORVU.MOREX.r3.6HG0559850	HORVU.MOREX.r3.5HG0420170	HORVU.MOREX.r3.3HG0310510	HORVU.MOREX.r3.2HG0189460	HORVU.MOREX.r3.3HG0271480
HORVU.MOREX.r3.1HG0028320	HORVU.MOREX.r3.7HG0680490	HORVU.MOREX.r3.6HG0559870	HORVU.MOREX.r3.5HG0420180	HORVU.MOREX.r3.3HG0310520	HORVU.MOREX.r3.2HG0189470	HORVU.MOREX.r3.3HG0271530
HORVU.MOREX.r3.1HG0028360	HORVU.MOREX.r3.7HG0680520	HORVU.MOREX.r3.6HG0559890	HORVU.MOREX.r3.5HG0420190	HORVU.MOREX.r3.3HG0310530	HORVU.MOREX.r3.2HG0189530	HORVU.MOREX.r3.3HG0271540
HORVU.MOREX.r3.1HG0028380	HORVU.MOREX.r3.7HG0680530	HORVU.MOREX.r3.6HG0559930	HORVU.MOREX.r3.5HG0420210	HORVU.MOREX.r3.3HG0310540	HORVU.MOREX.r3.2HG0189540	HORVU.MOREX.r3.3HG0271550
HORVU.MOREX.r3.1HG0028400	HORVU.MOREX.r3.7HG0680540	HORVU.MOREX.r3.6HG0559940	HORVU.MOREX.r3.5HG0420230	HORVU.MOREX.r3.3HG0310550	HORVU.MOREX.r3.2HG0189550	HORVU.MOREX.r3.3HG0271560
HORVU.MOREX.r3.1HG0028440	HORVU.MOREX.r3.7HG0680550	HORVU.MOREX.r3.6HG0559950	HORVU.MOREX.r3.5HG0420270	HORVU.MOREX.r3.3HG0310560	HORVU.MOREX.r3.2HG0189580	HORVU.MOREX.r3.3HG0271570
HORVU.MOREX.r3.1HG0028450	HORVU.MOREX.r3.7HG0680610	HORVU.MOREX.r3.6HG0559960	HORVU.MOREX.r3.5HG0420290	HORVU.MOREX.r3.3HG0310580	HORVU.MOREX.r3.2HG0189600	HORVU.MOREX.r3.3HG0271580
HORVU.MOREX.r3.1HG0028570	HORVU.MOREX.r3.7HG0680680	HORVU.MOREX.r3.6HG0559980	HORVU.MOREX.r3.5HG0420310	HORVU.MOREX.r3.3HG0310600	HORVU.MOREX.r3.2HG0189620	HORVU.MOREX.r3.3HG0271600
HORVU.MOREX.r3.1HG0028790	HORVU.MOREX.r3.7HG0680690	HORVU.MOREX.r3.6HG0559990	HORVU.MOREX.r3.5HG0420320	HORVU.MOREX.r3.3HG0310610	HORVU.MOREX.r3.2HG0189640	HORVU.MOREX.r3.3HG0271640
HORVU.MOREX.r3.1HG0028850	HORVU.MOREX.r3.7HG0680700	HORVU.MOREX.r3.6HG0560000	HORVU.MOREX.r3.5HG0420330	HORVU.MOREX.r3.3HG0310630	HORVU.MOREX.r3.2HG0189650	HORVU.MOREX.r3.3HG0271660
HORVU.MOREX.r3.1HG0028870	HORVU.MOREX.r3.7HG0680710	HORVU.MOREX.r3.6HG0560010	HORVU.MOREX.r3.5HG0420340	HORVU.MOREX.r3.3HG0310640	HORVU.MOREX.r3.2HG0189660	HORVU.MOREX.r3.3HG0271700
HORVU.MOREX.r3.1HG0029060	HORVU.MOREX.r3.7HG0680750	HORVU.MOREX.r3.6HG0560030	HORVU.MOREX.r3.5HG0420350	HORVU.MOREX.r3.3HG0310660	HORVU.MOREX.r3.2HG0189670	HORVU.MOREX.r3.3HG0271710
HORVU.MOREX.r3.1HG0029090	HORVU.MOREX.r3.7HG0680770	HORVU.MOREX.r3.6HG0560050	HORVU.MOREX.r3.5HG0420370	HORVU.MOREX.r3.3HG0310670	HORVU.MOREX.r3.2HG0189680	HORVU.MOREX.r3.3HG0271740
HORVU.MOREX.r3.1HG0029100	HORVU.MOREX.r3.7HG0680840	HORVU.MOREX.r3.6HG0560100	HORVU.MOREX.r3.5HG0420380	HORVU.MOREX.r3.3HG0310680	HORVU.MOREX.r3.2HG0189710	HORVU.MOREX.r3.3HG0271870
HORVU.MOREX.r3.1HG0029140	HORVU.MOREX.r3.7HG0680850	HORVU.MOREX.r3.6HG0560140	HORVU.MOREX.r3.5HG0420410	HORVU.MOREX.r3.3HG0310690	HORVU.MOREX.r3.2HG0189720	HORVU.MOREX.r3.3HG0271900
HORVU.MOREX.r3.1HG0029150	HORVU.MOREX.r3.7HG0680870	HORVU.MOREX.r3.6HG0560150	HORVU.MOREX.r3.5HG0420420	HORVU.MOREX.r3.3HG0310700	HORVU.MOREX.r3.2HG0189730	HORVU.MOREX.r3.3HG0271930
HORVU.MOREX.r3.1HG0029190	HORVU.MOREX.r3.7HG0680880	HORVU.MOREX.r3.6HG0560180	HORVU.MOREX.r3.5HG0420450	HORVU.MOREX.r3.3HG0310710	HORVU.MOREX.r3.2HG0189740	HORVU.MOREX.r3.3HG0271960
HORVU.MOREX.r3.1HG0029200	HORVU.MOREX.r3.7HG0680900	HORVU.MOREX.r3.6HG0560190	HORVU.MOREX.r3.5HG0420460	HORVU.MOREX.r3.3HG0310750	HORVU.MOREX.r3.2HG0189750	HORVU.MOREX.r3.3HG0272030
HORVU.MOREX.r3.1HG0029210	HORVU.MOREX.r3.7HG0680960	HORVU.MOREX.r3.6HG0560200	HORVU.MOREX.r3.5HG0420480	HORVU.MOREX.r3.3HG0310780	HORVU.MOREX.r3.2HG0189780	HORVU.MOREX.r3.3HG0272100
HORVU.MOREX.r3.1HG0029220	HORVU.MOREX.r3.7HG0680970	HORVU.MOREX.r3.6HG0560240	HORVU.MOREX.r3.5HG0420500	HORVU.MOREX.r3.3HG0310800	HORVU.MOREX.r3.2HG0189790	HORVU.MOREX.r3.3HG0272120
HORVU.MOREX.r3.1HG0029240	HORVU.MOREX.r3.7HG0680980	HORVU.MOREX.r3.6HG0560330	HORVU.MOREX.r3.5HG0420620	HORVU.MOREX.r3.3HG0310810	HORVU.MOREX.r3.2HG0189800	HORVU.MOREX.r3.3HG0272130
HORVU.MOREX.r3.1HG0029270	HORVU.MOREX.r3.7HG0680990	HORVU.MOREX.r3.6HG0560370	HORVU.MOREX.r3.5HG0420630	HORVU.MOREX.r3.3HG0310820	HORVU.MOREX.r3.2HG0189810	HORVU.MOREX.r3.3HG0272140
HORVU.MOREX.r3.1HG0029280	HORVU.MOREX.r3.7HG0681040	HORVU.MOREX.r3.6HG0560390	HORVU.MOREX.r3.5HG0420640	HORVU.MOREX.r3.3HG0310830	HORVU.MOREX.r3.2HG0189820	HORVU.MOREX.r3.3HG0272150
HORVU.MOREX.r3.1HG0029300	HORVU.MOREX.r3.7HG0681050	HORVU.MOREX.r3.6HG0560450	HORVU.MOREX.r3.5HG0420650	HORVU.MOREX.r3.3HG0310920	HORVU.MOREX.r3.2HG0189830	HORVU.MOREX.r3.3HG0272160
HORVU.MOREX.r3.1HG0029320	HORVU.MOREX.r3.7HG0681060	HORVU.MOREX.r3.6HG0560460	HORVU.MOREX.r3.5HG0420660	HORVU.MOREX.r3.3HG0310930	HORVU.MOREX.r3.2HG0189840	HORVU.MOREX.r3.3HG0272170
HORVU.MOREX.r3.1HG0029340	HORVU.MOREX.r3.7HG0681090	HORVU.MOREX.r3.6HG0560470	HORVU.MOREX.r3.5HG0420670	HORVU.MOREX.r3.3HG0310940	HORVU.MOREX.r3.2HG0189850	HORVU.MOREX.r3.3HG0272240
HORVU.MOREX.r3.1HG0029360	HORVU.MOREX.r3.7HG0681100	HORVU.MOREX.r3.6HG0560480	HORVU.MOREX.r3.5HG0420680	HORVU.MOREX.r3.3HG0310970	HORVU.MOREX.r3.2HG0189870	HORVU.MOREX.r3.3HG0272250
HORVU.MOREX.r3.1HG0029430	HORVU.MOREX.r3.7HG0681130	HORVU.MOREX.r3.6HG0560490	HORVU.MOREX.r3.5HG0420690	HORVU.MOREX.r3.3HG0311010	HORVU.MOREX.r3.2HG0189890	HORVU.MOREX.r3.3HG0272260
HORVU.MOREX.r3.1HG0029470	HORVU.MOREX.r3.7HG0681140	HORVU.MOREX.r3.6HG0560500	HORVU.MOREX.r3.5HG0420700	HORVU.MOREX.r3.3HG0311040	HORVU.MOREX.r3.2HG0189930	HORVU.MOREX.r3.3HG0272290
HORVU.MOREX.r3.1HG0029480	HORVU.MOREX.r3.7HG0681160	HORVU.MOREX.r3.6HG0560520	HORVU.MOREX.r3.5HG0420710	HORVU.MOREX.r3.3HG0311050	HORVU.MOREX.r3.2HG0189940	HORVU.MOREX.r3.3HG0272300
HORVU.MOREX.r3.1HG0029490	HORVU.MOREX.r3.7HG0681170	HORVU.MOREX.r3.6HG0560530	HORVU.MOREX.r3.5HG0420720	HORVU.MOREX.r3.3HG0311060	HORVU.MOREX.r3.2HG0189950	HORVU.MOREX.r3.3HG0272350
HORVU.MOREX.r3.1HG0029500	HORVU.MOREX.r3.7HG0681180	HORVU.MOREX.r3.6HG0560630	HORVU.MOREX.r3.5HG0420730	HORVU.MOREX.r3.3HG0311070	HORVU.MOREX.r3.2HG0189960	HORVU.MOREX.r3.3HG0272360
HORVU.MOREX.r3.1HG0029510	HORVU.MOREX.r3.7HG0681220	HORVU.MOREX.r3.6HG0560640	HORVU.MOREX.r3.5HG0420740	HORVU.MOREX.r3.3HG0311090	HORVU.MOREX.r3.2HG0189970	HORVU.MOREX.r3.3HG0272390
HORVU.MOREX.r3.1HG0029520	HORVU.MOREX.r3.7HG0681230	HORVU.MOREX.r3.6HG0560670	HORVU.MOREX.r3.5HG0420760	HORVU.MOREX.r3.3HG0311140	HORVU.MOREX.r3.2HG0189980	HORVU.MOREX.r3.3HG0272410
HORVU.MOREX.r3.1HG0029540	HORVU.MOREX.r3.7HG0681240	HORVU.MOREX.r3.6HG0560680	HORVU.MOREX.r3.5HG0420780	HORVU.MOREX.r3.3HG0311160	HORVU.MOREX.r3.2HG0189990	HORVU.MOREX.r3.3HG0272430
HORVU.MOREX.r3.1HG0029600	HORVU.MOREX.r3.7HG0681250	HORVU.MOREX.r3.6HG0560690	HORVU.MOREX.r3.5HG0420790	HORVU.MOREX.r3.3HG0311260	HORVU.MOREX.r3.2HG0190010	HORVU.MOREX.r3.3HG0272470
HORVU.MOREX.r3.1HG0029620	HORVU.MOREX.r3.7HG0681260	HORVU.MOREX.r3.6HG0560710	HORVU.MOREX.r3.5HG0420830	HORVU.MOREX.r3.3HG0311380	HORVU.MOREX.r3.2HG0190020	HORVU.MOREX.r3.3HG0272480
HORVU.MOREX.r3.1HG0029650	HORVU.MOREX.r3.7HG0681300	HORVU.MOREX.r3.6HG0560740	HORVU.MOREX.r3.5HG0420850	HORVU.MOREX.r3.3HG0311390	HORVU.MOREX.r3.2HG0190040	HORVU.MOREX.r3.3HG0272500
HORVU.MOREX.r3.1HG0029680	HORVU.MOREX.r3.7HG0681330	HORVU.MOREX.r3.6HG0560760	HORVU.MOREX.r3.5HG0420860	HORVU.MOREX.r3.3HG0311410	HORVU.MOREX.r3.2HG0190070	HORVU.MOREX.r3.3HG0272630
HORVU.MOREX.r3.1HG0029690	HORVU.MOREX.r3.7HG0681410	HORVU.MOREX.r3.6HG0560790	HORVU.MOREX.r3.5HG0420880	HORVU.MOREX.r3.3HG0311440	HORVU.MOREX.r3.2HG0190080	HORVU.MOREX.r3.3HG0272660
HORVU.MOREX.r3.1HG0029730	HORVU.MOREX.r3.7HG0681470	HORVU.MOREX.r3.6HG0560870	HORVU.MOREX.r3.5HG0420890	HORVU.MOREX.r3.3HG0311460	HORVU.MOREX.r3.2HG0190100	HORVU.MOREX.r3.3HG0272690
HORVU.MOREX.r3.1HG0029780	HORVU.MOREX.r3.7HG0681540	HORVU.MOREX.r3.6HG0560910	HORVU.MOREX.r3.5HG0420900	HORVU.MOREX.r3.3HG0311470	HORVU.MOREX.r3.2HG0190110	HORVU.MOREX.r3.3HG0272890
HORVU.MOREX.r3.1HG0029820	HORVU.MOREX.r3.7HG0681550	HORVU.MOREX.r3.6HG0560920	HORVU.MOREX.r3.5HG0420910	HORVU.MOREX.r3.3HG0311480	HORVU.MOREX.r3.2HG0190140	HORVU.MOREX.r3.3HG0272980
HORVU.MOREX.r3.1HG0029890	HORVU.MOREX.r3.7HG0681560	HORVU.MOREX.r3.6HG0560930	HORVU.MOREX.r3.5HG0420920	HORVU.MOREX.r3.3HG0311490	HORVU.MOREX.r3.2HG0190170	HORVU.MOREX.r3.3HG0273010
HORVU.MOREX.r3.1HG0029900	HORVU.MOREX.r3.7HG0681650	HORVU.MOREX.r3.6HG0560940	HORVU.MOREX.r3.5HG0420960	HORVU.MOREX.r3.3HG0311510	HORVU.MOREX.r3.2HG0190210	HORVU.MOREX.r3.3HG0273030
HORVU.MOREX.r3.1HG0029910	HORVU.MOREX.r3.7HG0681680	HORVU.MOREX.r3.6HG0560970	HORVU.MOREX.r3.5HG0420970	HORVU.MOREX.r3.3HG0311520	HORVU.MOREX.r3.2HG0190220	HORVU.MOREX.r3.3HG0273060
HORVU.MOREX.r3.1HG0029990	HORVU.MOREX.r3.7HG0681690	HORVU.MOREX.r3.6HG0560980	HORVU.MOREX.r3.5HG0420980	HORVU.MOREX.r3.3HG0311550	HORVU.MOREX.r3.2HG0190230	HORVU.MOREX.r3.3HG0273070
HORVU.MOREX.r3.1HG0030000	HORVU.MOREX.r3.7HG0681700	HORVU.MOREX.r3.6HG0561000	HORVU.MOREX.r3.5HG0420990	HORVU.MOREX.r3.3HG0311560	HORVU.MOREX.r3.2HG0190240	HORVU.MOREX.r3.3HG0273080
HORVU.MOREX.r3.1HG0030010	HORVU.MOREX.r3.7HG0681730	HORVU.MOREX.r3.6HG0561020	HORVU.MOREX.r3.5HG0421020	HORVU.MOREX.r3.3HG0311570	HORVU.MOREX.r3.2HG0190250	HORVU.MOREX.r3.3HG0273130
HORVU.MOREX.r3.1HG0030080	HORVU.MOREX.r3.7HG0681750	HORVU.MOREX.r3.6HG0561080	HORVU.MOREX.r3.5HG0421030	HORVU.MOREX.r3.3HG0311580	HORVU.MOREX.r3.2HG0190260	HORVU.MOREX.r3.3HG0273140
HORVU.MOREX.r3.1HG0030090	HORVU.MOREX.r3.7HG0681820	HORVU.MOREX.r3.6HG0561100	HORVU.MOREX.r3.5HG0421040	HORVU.MOREX.r3.3HG0311590	HORVU.MOREX.r3.2HG0190270	HORVU.MOREX.r3.3HG0273160
HORVU.MOREX.r3.1HG0030120	HORVU.MOREX.r3.7HG0681830	HORVU.MOREX.r3.6HG0561130	HORVU.MOREX.r3.5HG0421070	HORVU.MOREX.r3.3HG0311600	HORVU.MOREX.r3.2HG0190290	HORVU.MOREX.r3.3HG0273170
HORVU.MOREX.r3.1HG0030200	HORVU.MOREX.r3.7HG0681850	HORVU.MOREX.r3.6HG0561140	HORVU.MOREX.r3.5HG0421100	HORVU.MOREX.r3.3HG0311610	HORVU.MOREX.r3.2HG0190300	HORVU.MOREX.r3.3HG0273210
HORVU.MOREX.r3.1HG0030210	HORVU.MOREX.r3.7HG0681870	HORVU.MOREX.r3.6HG0561150	HORVU.MOREX.r3.5HG0421110	HORVU.MOREX.r3.3HG0311630	HORVU.MOREX.r3.2HG0190310	HORVU.MOREX.r3.3HG0273250
HORVU.MOREX.r3.1HG0030220	HORVU.MOREX.r3.7HG0681920	HORVU.MOREX.r3.6HG0561170	HORVU.MOREX.r3.5HG0421130	HORVU.MOREX.r3.3HG0311640	HORVU.MOREX.r3.2HG0190330	HORVU.MOREX.r3.3HG0273270
HORVU.MOREX.r3.1HG0030230	HORVU.MOREX.r3.7HG0681930	HORVU.MOREX.r3.6HG0561180	HORVU.MOREX.r3.5HG0421140	HORVU.MOREX.r3.3HG0311650	HORVU.MOREX.r3.2HG0190340	HORVU.MOREX.r3.3HG0273280
HORVU.MOREX.r3.1HG0030240	HORVU.MOREX.r3.7HG0681940	HORVU.MOREX.r3.6HG0561190	HORVU.MOREX.r3.5HG0421150	HORVU.MOREX.r3.3HG0311690	HORVU.MOREX.r3.2HG0190350	HORVU.MOREX.r3.3HG0273290
HORVU.MOREX.r3.1HG0030280	HORVU.MOREX.r3.7HG0681950	HORVU.MOREX.r3.6HG0561250	HORVU.MOREX.r3.5HG0421160	HORVU.MOREX.r3.3HG0311700	HORVU.MOREX.r3.2HG0190380	HORVU.MOREX.r3.3HG0273300
HORVU.MOREX.r3.1HG0030290	HORVU.MOREX.r3.7HG0681960	HORVU.MOREX.r3.6HG0561260	HORVU.MOREX.r3.5HG0421170	HORVU.MOREX.r3.3HG0311710	HORVU.MOREX.r3.2HG0190390	HORVU.MOREX.r3.3HG0273330
HORVU.MOREX.r3.1HG0030320	HORVU.MOREX.r3.7HG0682010	HORVU.MOREX.r3.6HG0561270	HORVU.MOREX.r3.5HG0421200	HORVU.MOREX.r3.3HG0311720	HORVU.MOREX.r3.2HG0190400	HORVU.MOREX.r3.3HG0273340
HORVU.MOREX.r3.1HG0030330	HORVU.MOREX.r3.7HG0682020	HORVU.MOREX.r3.6HG0561380	HORVU.MOREX.r3.5HG0421220	HORVU.MOREX.r3.3HG0311730	HORVU.MOREX.r3.2HG0190410	HORVU.MOREX.r3.3HG0273350
HORVU.MOREX.r3.1HG0030350	HORVU.MOREX.r3.7HG0682050	HORVU.MOREX.r3.6HG0561400	HORVU.MOREX.r3.5HG0421290	HORVU.MOREX.r3.3HG0311740	HORVU.MOREX.r3.2HG0190420	HORVU.MOREX.r3.3HG0273390
HORVU.MOREX.r3.1HG0030390	HORVU.MOREX.r3.7HG0682060	HORVU.MOREX.r3.6HG0561410	HORVU.MOREX.r3.5HG0421310	HORVU.MOREX.r3.3HG0311760	HORVU.MOREX.r3.2HG0190430	HORVU.MOREX.r3.3HG0273410
HORVU.MOREX.r3.1HG0030500	HORVU.MOREX.r3.7HG0682080	HORVU.MOREX.r3.6HG0561430	HORVU.MOREX.r3.5HG0421350	HORVU.MOREX.r3.3HG0311780	HORVU.MOREX.r3.2HG0190440	HORVU.MOREX.r3.3HG0273430
HORVU.MOREX.r3.1HG0030510	HORVU.MOREX.r3.7HG0682090	HORVU.MOREX.r3.6HG0561440	HORVU.MOREX.r3.5HG0421360	HORVU.MOREX.r3.3HG0311790	HORVU.MOREX.r3.2HG0190450	HORVU.MOREX.r3.3HG0273450
HORVU.MOREX.r3.1HG0030520	HORVU.MOREX.r3.7HG0682120	HORVU.MOREX.r3.6HG0561510	HORVU.MOREX.r3.5HG0421370	HORVU.MOREX.r3.3HG0311800	HORVU.MOREX.r3.2HG0190460	HORVU.MOREX.r3.3HG0273460
HORVU.MOREX.r3.1HG0030590	HORVU.MOREX.r3.7HG0682130	HORVU.MOREX.r3.6HG0561530	HORVU.MOREX.r3.5HG0421410	HORVU.MOREX.r3.3HG0311810	HORVU.MOREX.r3.2HG0190470	HORVU.MOREX.r3.3HG0273490
HORVU.MOREX.r3.1HG0030630	HORVU.MOREX.r3.7HG0682160	HORVU.MOREX.r3.6HG0561570	HORVU.MOREX.r3.5HG0421420	HORVU.MOREX.r3.3HG0311820	HORVU.MOREX.r3.2HG0190500	HORVU.MOREX.r3.3HG0273500
HORVU.MOREX.r3.1HG0030640	HORVU.MOREX.r3.7HG0682170	HORVU.MOREX.r3.6HG0561600	HORVU.MOREX.r3.5HG0421430	HORVU.MOREX.r3.3HG0311830	HORVU.MOREX.r3.2HG0190550	HORVU.MOREX.r3.3HG0273510
HORVU.MOREX.r3.1HG0030650	HORVU.MOREX.r3.7HG0682220	HORVU.MOREX.r3.6HG0561620	HORVU.MOREX.r3.5HG0421450	HORVU.MOREX.r3.3HG0311840	HORVU.MOREX.r3.2HG0190560	HORVU.MOREX.r3.3HG0273530
HORVU.MOREX.r3.1HG0030690	HORVU.MOREX.r3.7HG0682400	HORVU.MOREX.r3.6HG0561650	HORVU.MOREX.r3.5HG0421460	HORVU.MOREX.r3.3HG0311900	HORVU.MOREX.r3.2HG0190570	HORVU.MOREX.r3.3HG0273540
HORVU.MOREX.r3.1HG0030700	HORVU.MOREX.r3.7HG0682410	HORVU.MOREX.r3.6HG0561660	HORVU.MOREX.r3.5HG0421470	HORVU.MOREX.r3.3HG0311920	HORVU.MOREX.r3.2HG0190600	HORVU.MOREX.r3.3HG0273590
HORVU.MOREX.r3.1HG0030720	HORVU.MOREX.r3.7HG0682420	HORVU.MOREX.r3.6HG0561680	HORVU.MOREX.r3.5HG0421560	HORVU.MOREX.r3.3HG0311930	HORVU.MOREX.r3.2HG0190610	HORVU.MOREX.r3.3HG0273610
HORVU.MOREX.r3.1HG0030730	HORVU.MOREX.r3.7HG0682430	HORVU.MOREX.r3.6HG0561700	HORVU.MOREX.r3.5HG0421570	HORVU.MOREX.r3.3HG0311940	HORVU.MOREX.r3.2HG0190620	HORVU.MOREX.r3.3HG0273620
HORVU.MOREX.r3.1HG0030750	HORVU.MOREX.r3.7HG0682460	HORVU.MOREX.r3.6HG0561820	HORVU.MOREX.r3.5HG0421580	HORVU.MOREX.r3.3HG0311950	HORVU.MOREX.r3.2HG0190630	HORVU.MOREX.r3.3HG0273630
HORVU.MOREX.r3.1HG0030850	HORVU.MOREX.r3.7HG0682490	HORVU.MOREX.r3.6HG0561870	HORVU.MOREX.r3.5HG0421680	HORVU.MOREX.r3.3HG0312000	HORVU.MOREX.r3.2HG0190650	HORVU.MOREX.r3.3HG0273640
HORVU.MOREX.r3.1HG0030870	HORVU.MOREX.r3.7HG0682550	HORVU.MOREX.r3.6HG0561940	HORVU.MOREX.r3.5HG0421690	HORVU.MOREX.r3.3HG0312010	HORVU.MOREX.r3.2HG0190660	HORVU.MOREX.r3.3HG0273660
HORVU.MOREX.r3.1HG0031030	HORVU.MOREX.r3.7HG0682610	HORVU.MOREX.r3.6HG0561950	HORVU.MOREX.r3.5HG0421710	HORVU.MOREX.r3.3HG0312020	HORVU.MOREX.r3.2HG0190670	HORVU.MOREX.r3.3HG0273790
HORVU.MOREX.r3.1HG0031170	HORVU.MOREX.r3.7HG0682620	HORVU.MOREX.r3.6HG0561960	HORVU.MOREX.r3.5HG0421720	HORVU.MOREX.r3.3HG0312030	HORVU.MOREX.r3.2HG0190680	HORVU.MOREX.r3.3HG0273800
HORVU.MOREX.r3.1HG0031180	HORVU.MOREX.r3.7HG0682630	HORVU.MOREX.r3.6HG0562080	HORVU.MOREX.r3.5HG0421760	HORVU.MOREX.r3.3HG0312050	HORVU.MOREX.r3.2HG0190700	HORVU.MOREX.r3.3HG0273810
HORVU.MOREX.r3.1HG0031210	HORVU.MOREX.r3.7HG0682640	HORVU.MOREX.r3.6HG0562150	HORVU.MOREX.r3.5HG0421810	HORVU.MOREX.r3.3HG0312070	HORVU.MOREX.r3.2HG0190710	HORVU.MOREX.r3.3HG0273880
HORVU.MOREX.r3.1HG0031220	HORVU.MOREX.r3.7HG0682660	HORVU.MOREX.r3.6HG0562460	HORVU.MOREX.r3.5HG0421830	HORVU.MOREX.r3.3HG0312090	HORVU.MOREX.r3.2HG0190730	HORVU.MOREX.r3.3HG0273910
HORVU.MOREX.r3.1HG0031230	HORVU.MOREX.r3.7HG0682690	HORVU.MOREX.r3.6HG0562490	HORVU.MOREX.r3.5HG0421840	HORVU.MOREX.r3.3HG0312140	HORVU.MOREX.r3.2HG0190740	HORVU.MOREX.r3.3HG0274000
HORVU.MOREX.r3.1HG0031260	HORVU.MOREX.r3.7HG0682760	HORVU.MOREX.r3.6HG0562710	HORVU.MOREX.r3.5HG0421880	HORVU.MOREX.r3.3HG0312160	HORVU.MOREX.r3.2HG0190750	HORVU.MOREX.r3.3HG0274020
HORVU.MOREX.r3.1HG0031270	HORVU.MOREX.r3.7HG0682790	HORVU.MOREX.r3.6HG0562790	HORVU.MOREX.r3.5HG0421920	HORVU.MOREX.r3.3HG0312190	HORVU.MOREX.r3.2HG0190790	HORVU.MOREX.r3.3HG0274030
HORVU.MOREX.r3.1HG0031310	HORVU.MOREX.r3.7HG0682830	HORVU.MOREX.r3.6HG0562930	HORVU.MOREX.r3.5HG0422080	HORVU.MOREX.r3.3HG0312200	HORVU.MOREX.r3.2HG0190800	HORVU.MOREX.r3.3HG0274040
HORVU.MOREX.r3.1HG0031320	HORVU.MOREX.r3.7HG0682910	HORVU.MOREX.r3.6HG0563070	HORVU.MOREX.r3.5HG0422110	HORVU.MOREX.r3.3HG0312220	HORVU.MOREX.r3.2HG0190860	HORVU.MOREX.r3.3HG0274050
HORVU.MOREX.r3.1HG0031340	HORVU.MOREX.r3.7HG0682920	HORVU.MOREX.r3.6HG0563110	HORVU.MOREX.r3.5HG0422130	HORVU.MOREX.r3.3HG0312230	HORVU.MOREX.r3.2HG0190890	HORVU.MOREX.r3.3HG0274060
HORVU.MOREX.r3.1HG0031380	HORVU.MOREX.r3.7HG0682930	HORVU.MOREX.r3.6HG0563170	HORVU.MOREX.r3.5HG0422220	HORVU.MOREX.r3.3HG0312240	HORVU.MOREX.r3.2HG0190990	HORVU.MOREX.r3.3HG0274090
HORVU.MOREX.r3.1HG0031410	HORVU.MOREX.r3.7HG0682940	HORVU.MOREX.r3.6HG0563210	HORVU.MOREX.r3.5HG0422360	HORVU.MOREX.r3.3HG0312250	HORVU.MOREX.r3.2HG0191020	HORVU.MOREX.r3.3HG0274110
HORVU.MOREX.r3.1HG0031420	HORVU.MOREX.r3.7HG0682950	HORVU.MOREX.r3.6HG0563250	HORVU.MOREX.r3.5HG0422380	HORVU.MOREX.r3.3HG0312260	HORVU.MOREX.r3.2HG0191040	HORVU.MOREX.r3.3HG0274120
HORVU.MOREX.r3.1HG0031450	HORVU.MOREX.r3.7HG0682960	HORVU.MOREX.r3.6HG0563290	HORVU.MOREX.r3.5HG0422410	HORVU.MOREX.r3.3HG0312290	HORVU.MOREX.r3.2HG0191070	HORVU.MOREX.r3.3HG0274130
HORVU.MOREX.r3.1HG0031460	HORVU.MOREX.r3.7HG0683020	HORVU.MOREX.r3.6HG0563370	HORVU.MOREX.r3.5HG0422490	HORVU.MOREX.r3.3HG0312300	HORVU.MOREX.r3.2HG0191090	HORVU.MOREX.r3.3HG0274150
HORVU.MOREX.r3.1HG0031470	HORVU.MOREX.r3.7HG0683040	HORVU.MOREX.r3.6HG0563390	HORVU.MOREX.r3.5HG0422500	HORVU.MOREX.r3.3HG0312310	HORVU.MOREX.r3.2HG0191110	HORVU.MOREX.r3.3HG0274160
HORVU.MOREX.r3.1HG0031480	HORVU.MOREX.r3.7HG0683070	HORVU.MOREX.r3.6HG0563440	HORVU.MOREX.r3.5HG0422530	HORVU.MOREX.r3.3HG0312320	HORVU.MOREX.r3.2HG0191120	HORVU.MOREX.r3.3HG0274170
HORVU.MOREX.r3.1HG0031520	HORVU.MOREX.r3.7HG0683090	HORVU.MOREX.r3.6HG0563460	HORVU.MOREX.r3.5HG0422540	HORVU.MOREX.r3.3HG0312340	HORVU.MOREX.r3.2HG0191130	HORVU.MOREX.r3.3HG0274180
HORVU.MOREX.r3.1HG0031680	HORVU.MOREX.r3.7HG0683100	HORVU.MOREX.r3.6HG0563500	HORVU.MOREX.r3.5HG0422600	HORVU.MOREX.r3.3HG0312360	HORVU.MOREX.r3.2HG0191140	HORVU.MOREX.r3.3HG0274260
HORVU.MOREX.r3.1HG0031730	HORVU.MOREX.r3.7HG0683110	HORVU.MOREX.r3.6HG0563560	HORVU.MOREX.r3.5HG0422660	HORVU.MOREX.r3.3HG0312370	HORVU.MOREX.r3.2HG0191150	HORVU.MOREX.r3.3HG0274270
HORVU.MOREX.r3.1HG0031740	HORVU.MOREX.r3.7HG0683150	HORVU.MOREX.r3.6HG0563570	HORVU.MOREX.r3.5HG0422670	HORVU.MOREX.r3.3HG0312400	HORVU.MOREX.r3.2HG0191180	HORVU.MOREX.r3.3HG0274310
HORVU.MOREX.r3.1HG0031750	HORVU.MOREX.r3.7HG0683160	HORVU.MOREX.r3.6HG0563580	HORVU.MOREX.r3.5HG0422690	HORVU.MOREX.r3.3HG0312410	HORVU.MOREX.r3.2HG0191210	HORVU.MOREX.r3.3HG0274320
HORVU.MOREX.r3.1HG0031770	HORVU.MOREX.r3.7HG0683230	HORVU.MOREX.r3.6HG0563600	HORVU.MOREX.r3.5HG0422710	HORVU.MOREX.r3.3HG0312420	HORVU.MOREX.r3.2HG0191220	HORVU.MOREX.r3.3HG0274350
HORVU.MOREX.r3.1HG0031820	HORVU.MOREX.r3.7HG0683250	HORVU.MOREX.r3.6HG0563610	HORVU.MOREX.r3.5HG0422720	HORVU.MOREX.r3.3HG0312430	HORVU.MOREX.r3.2HG0191230	HORVU.MOREX.r3.3HG0274380
HORVU.MOREX.r3.1HG0031900	HORVU.MOREX.r3.7HG0683270	HORVU.MOREX.r3.6HG0563620	HORVU.MOREX.r3.5HG0422780	HORVU.MOREX.r3.3HG0312440	HORVU.MOREX.r3.2HG0191240	HORVU.MOREX.r3.3HG0274450
HORVU.MOREX.r3.1HG0031920	HORVU.MOREX.r3.7HG0683280	HORVU.MOREX.r3.6HG0563630	HORVU.MOREX.r3.5HG0422930	HORVU.MOREX.r3.3HG0312450	HORVU.MOREX.r3.2HG0191250	HORVU.MOREX.r3.3HG0274500
HORVU.MOREX.r3.1HG0031940	HORVU.MOREX.r3.7HG0683350	HORVU.MOREX.r3.6HG0563640	HORVU.MOREX.r3.5HG0422940	HORVU.MOREX.r3.3HG0312460	HORVU.MOREX.r3.2HG0191260	HORVU.MOREX.r3.3HG0274520
HORVU.MOREX.r3.1HG0031950	HORVU.MOREX.r3.7HG0683360	HORVU.MOREX.r3.6HG0563650	HORVU.MOREX.r3.5HG0422950	HORVU.MOREX.r3.3HG0312470	HORVU.MOREX.r3.2HG0191300	HORVU.MOREX.r3.3HG0274530
HORVU.MOREX.r3.1HG0031980	HORVU.MOREX.r3.7HG0683440	HORVU.MOREX.r3.6HG0563670	HORVU.MOREX.r3.5HG0423020	HORVU.MOREX.r3.3HG0312490	HORVU.MOREX.r3.2HG0191320	HORVU.MOREX.r3.3HG0274550
HORVU.MOREX.r3.1HG0032000	HORVU.MOREX.r3.7HG0683450	HORVU.MOREX.r3.6HG0563730	HORVU.MOREX.r3.5HG0423030	HORVU.MOREX.r3.3HG0312500	HORVU.MOREX.r3.2HG0191330	HORVU.MOREX.r3.3HG0274610
HORVU.MOREX.r3.1HG0032010	HORVU.MOREX.r3.7HG0683460	HORVU.MOREX.r3.6HG0563740	HORVU.MOREX.r3.5HG0423040	HORVU.MOREX.r3.3HG0312510	HORVU.MOREX.r3.2HG0191360	HORVU.MOREX.r3.3HG0274620
HORVU.MOREX.r3.1HG0032030	HORVU.MOREX.r3.7HG0683470	HORVU.MOREX.r3.6HG0563760	HORVU.MOREX.r3.5HG0423060	HORVU.MOREX.r3.3HG0312530	HORVU.MOREX.r3.2HG0191380	HORVU.MOREX.r3.3HG0274630
HORVU.MOREX.r3.1HG0032040	HORVU.MOREX.r3.7HG0683490	HORVU.MOREX.r3.6HG0563790	HORVU.MOREX.r3.5HG0423070	HORVU.MOREX.r3.3HG0312540	HORVU.MOREX.r3.2HG0191390	HORVU.MOREX.r3.3HG0274650
HORVU.MOREX.r3.1HG0032050	HORVU.MOREX.r3.7HG0683500	HORVU.MOREX.r3.6HG0563800	HORVU.MOREX.r3.5HG0423080	HORVU.MOREX.r3.3HG0312550	HORVU.MOREX.r3.2HG0191410	HORVU.MOREX.r3.3HG0274660
HORVU.MOREX.r3.1HG0032070	HORVU.MOREX.r3.7HG0683510	HORVU.MOREX.r3.6HG0563820	HORVU.MOREX.r3.5HG0423090	HORVU.MOREX.r3.3HG0312560	HORVU.MOREX.r3.2HG0191420	HORVU.MOREX.r3.3HG0274670
HORVU.MOREX.r3.1HG0032140	HORVU.MOREX.r3.7HG0683550	HORVU.MOREX.r3.6HG0563900	HORVU.MOREX.r3.5HG0423100	HORVU.MOREX.r3.3HG0312580	HORVU.MOREX.r3.2HG0191430	HORVU.MOREX.r3.3HG0274680
HORVU.MOREX.r3.1HG0032150	HORVU.MOREX.r3.7HG0683560	HORVU.MOREX.r3.6HG0563930	HORVU.MOREX.r3.5HG0423110	HORVU.MOREX.r3.3HG0312600	HORVU.MOREX.r3.2HG0191440	HORVU.MOREX.r3.3HG0274690
HORVU.MOREX.r3.1HG0032160	HORVU.MOREX.r3.7HG0683570	HORVU.MOREX.r3.6HG0563940	HORVU.MOREX.r3.5HG0423130	HORVU.MOREX.r3.3HG0312620	HORVU.MOREX.r3.2HG0191450	HORVU.MOREX.r3.3HG0274700
HORVU.MOREX.r3.1HG0032170	HORVU.MOREX.r3.7HG0683600	HORVU.MOREX.r3.6HG0563970	HORVU.MOREX.r3.5HG0423140	HORVU.MOREX.r3.3HG0312640	HORVU.MOREX.r3.2HG0191460	HORVU.MOREX.r3.3HG0274780
HORVU.MOREX.r3.1HG0032200	HORVU.MOREX.r3.7HG0683640	HORVU.MOREX.r3.6HG0563980	HORVU.MOREX.r3.5HG0423160	HORVU.MOREX.r3.3HG0312670	HORVU.MOREX.r3.2HG0191470	HORVU.MOREX.r3.3HG0274820
HORVU.MOREX.r3.1HG0032220	HORVU.MOREX.r3.7HG0683650	HORVU.MOREX.r3.6HG0564010	HORVU.MOREX.r3.5HG0423170	HORVU.MOREX.r3.3HG0312690	HORVU.MOREX.r3.2HG0191480	HORVU.MOREX.r3.3HG0274830
HORVU.MOREX.r3.1HG0032230	HORVU.MOREX.r3.7HG0683680	HORVU.MOREX.r3.6HG0564020	HORVU.MOREX.r3.5HG0423190	HORVU.MOREX.r3.3HG0312710	HORVU.MOREX.r3.2HG0191490	HORVU.MOREX.r3.3HG0274840
HORVU.MOREX.r3.1HG0032260	HORVU.MOREX.r3.7HG0683700	HORVU.MOREX.r3.6HG0564030	HORVU.MOREX.r3.5HG0423200	HORVU.MOREX.r3.3HG0312720	HORVU.MOREX.r3.2HG0191510	HORVU.MOREX.r3.3HG0274850
HORVU.MOREX.r3.1HG0032470	HORVU.MOREX.r3.7HG0683710	HORVU.MOREX.r3.6HG0564080	HORVU.MOREX.r3.5HG0423250	HORVU.MOREX.r3.3HG0312730	HORVU.MOREX.r3.2HG0191520	HORVU.MOREX.r3.3HG0274900
HORVU.MOREX.r3.1HG0032510	HORVU.MOREX.r3.7HG0683720	HORVU.MOREX.r3.6HG0564090	HORVU.MOREX.r3.5HG0423260	HORVU.MOREX.r3.3HG0312740	HORVU.MOREX.r3.2HG0191530	HORVU.MOREX.r3.3HG0274910
HORVU.MOREX.r3.1HG0032540	HORVU.MOREX.r3.7HG0683740	HORVU.MOREX.r3.6HG0564190	HORVU.MOREX.r3.5HG0423290	HORVU.MOREX.r3.3HG0312750	HORVU.MOREX.r3.2HG0191540	HORVU.MOREX.r3.3HG0274920
HORVU.MOREX.r3.1HG0032560	HORVU.MOREX.r3.7HG0683770	HORVU.MOREX.r3.6HG0564200	HORVU.MOREX.r3.5HG0423300	HORVU.MOREX.r3.3HG0312760	HORVU.MOREX.r3.2HG0191550	HORVU.MOREX.r3.3HG0274930
HORVU.MOREX.r3.1HG0032570	HORVU.MOREX.r3.7HG0683790	HORVU.MOREX.r3.6HG0564240	HORVU.MOREX.r3.5HG0423340	HORVU.MOREX.r3.3HG0312780	HORVU.MOREX.r3.2HG0191560	HORVU.MOREX.r3.3HG0275030
HORVU.MOREX.r3.1HG0032650	HORVU.MOREX.r3.7HG0683800	HORVU.MOREX.r3.6HG0564260	HORVU.MOREX.r3.5HG0423360	HORVU.MOREX.r3.3HG0312790	HORVU.MOREX.r3.2HG0191570	HORVU.MOREX.r3.3HG0275040
HORVU.MOREX.r3.1HG0032710	HORVU.MOREX.r3.7HG0683830	HORVU.MOREX.r3.6HG0564320	HORVU.MOREX.r3.5HG0423380	HORVU.MOREX.r3.3HG0312840	HORVU.MOREX.r3.2HG0191580	HORVU.MOREX.r3.3HG0275060
HORVU.MOREX.r3.1HG0032760	HORVU.MOREX.r3.7HG0683840	HORVU.MOREX.r3.6HG0564330	HORVU.MOREX.r3.5HG0423390	HORVU.MOREX.r3.3HG0312880	HORVU.MOREX.r3.2HG0191590	HORVU.MOREX.r3.3HG0275090
HORVU.MOREX.r3.1HG0032790	HORVU.MOREX.r3.7HG0683860	HORVU.MOREX.r3.6HG0564430	HORVU.MOREX.r3.5HG0423410	HORVU.MOREX.r3.3HG0312890	HORVU.MOREX.r3.2HG0191600	HORVU.MOREX.r3.3HG0275160
HORVU.MOREX.r3.1HG0032800	HORVU.MOREX.r3.7HG0683870	HORVU.MOREX.r3.6HG0564450	HORVU.MOREX.r3.5HG0423420	HORVU.MOREX.r3.3HG0312910	HORVU.MOREX.r3.2HG0191610	HORVU.MOREX.r3.3HG0275170
HORVU.MOREX.r3.1HG0032820	HORVU.MOREX.r3.7HG0683900	HORVU.MOREX.r3.6HG0564460	HORVU.MOREX.r3.5HG0423460	HORVU.MOREX.r3.3HG0312920	HORVU.MOREX.r3.2HG0191620	HORVU.MOREX.r3.3HG0275200
HORVU.MOREX.r3.1HG0032840	HORVU.MOREX.r3.7HG0683940	HORVU.MOREX.r3.6HG0564470	HORVU.MOREX.r3.5HG0423470	HORVU.MOREX.r3.3HG0312970	HORVU.MOREX.r3.2HG0191630	HORVU.MOREX.r3.3HG0275220
HORVU.MOREX.r3.1HG0032860	HORVU.MOREX.r3.7HG0683950	HORVU.MOREX.r3.6HG0564480	HORVU.MOREX.r3.5HG0423530	HORVU.MOREX.r3.3HG0313000	HORVU.MOREX.r3.2HG0191640	HORVU.MOREX.r3.3HG0275260
HORVU.MOREX.r3.1HG0032870	HORVU.MOREX.r3.7HG0683960	HORVU.MOREX.r3.6HG0564510	HORVU.MOREX.r3.5HG0423650	HORVU.MOREX.r3.3HG0313010	HORVU.MOREX.r3.2HG0191650	HORVU.MOREX.r3.3HG0275290
HORVU.MOREX.r3.1HG0032910	HORVU.MOREX.r3.7HG0683980	HORVU.MOREX.r3.6HG0564520	HORVU.MOREX.r3.5HG0423710	HORVU.MOREX.r3.3HG0313020	HORVU.MOREX.r3.2HG0191730	HORVU.MOREX.r3.3HG0275320
HORVU.MOREX.r3.1HG0032930	HORVU.MOREX.r3.7HG0684000	HORVU.MOREX.r3.6HG0564530	HORVU.MOREX.r3.5HG0423740	HORVU.MOREX.r3.3HG0313040	HORVU.MOREX.r3.2HG0191750	HORVU.MOREX.r3.3HG0275330
HORVU.MOREX.r3.1HG0032990	HORVU.MOREX.r3.7HG0684020	HORVU.MOREX.r3.6HG0564570	HORVU.MOREX.r3.5HG0423750	HORVU.MOREX.r3.3HG0313050	HORVU.MOREX.r3.2HG0191770	HORVU.MOREX.r3.3HG0275350
HORVU.MOREX.r3.1HG0033070	HORVU.MOREX.r3.7HG0684030	HORVU.MOREX.r3.6HG0564580	HORVU.MOREX.r3.5HG0423780	HORVU.MOREX.r3.3HG0313060	HORVU.MOREX.r3.2HG0191810	HORVU.MOREX.r3.3HG0275370
HORVU.MOREX.r3.1HG0033110	HORVU.MOREX.r3.7HG0684040	HORVU.MOREX.r3.6HG0564590	HORVU.MOREX.r3.5HG0423800	HORVU.MOREX.r3.3HG0313070	HORVU.MOREX.r3.2HG0191880	HORVU.MOREX.r3.3HG0275440
HORVU.MOREX.r3.1HG0033120	HORVU.MOREX.r3.7HG0684050	HORVU.MOREX.r3.6HG0564630	HORVU.MOREX.r3.5HG0423810	HORVU.MOREX.r3.3HG0313080	HORVU.MOREX.r3.2HG0191890	HORVU.MOREX.r3.3HG0275450
HORVU.MOREX.r3.1HG0033130	HORVU.MOREX.r3.7HG0684090	HORVU.MOREX.r3.6HG0564650	HORVU.MOREX.r3.5HG0423820	HORVU.MOREX.r3.3HG0313090	HORVU.MOREX.r3.2HG0191910	HORVU.MOREX.r3.3HG0275490
HORVU.MOREX.r3.1HG0033150	HORVU.MOREX.r3.7HG0684120	HORVU.MOREX.r3.6HG0564660	HORVU.MOREX.r3.5HG0423840	HORVU.MOREX.r3.3HG0313110	HORVU.MOREX.r3.2HG0191950	HORVU.MOREX.r3.3HG0275500
HORVU.MOREX.r3.1HG0033160	HORVU.MOREX.r3.7HG0684140	HORVU.MOREX.r3.6HG0564690	HORVU.MOREX.r3.5HG0423910	HORVU.MOREX.r3.3HG0313120	HORVU.MOREX.r3.2HG0191960	HORVU.MOREX.r3.3HG0275530
HORVU.MOREX.r3.1HG0033310	HORVU.MOREX.r3.7HG0684150	HORVU.MOREX.r3.6HG0564730	HORVU.MOREX.r3.5HG0423930	HORVU.MOREX.r3.3HG0313130	HORVU.MOREX.r3.2HG0191970	HORVU.MOREX.r3.3HG0275610
HORVU.MOREX.r3.1HG0033330	HORVU.MOREX.r3.7HG0684160	HORVU.MOREX.r3.6HG0564740	HORVU.MOREX.r3.5HG0423980	HORVU.MOREX.r3.3HG0313150	HORVU.MOREX.r3.2HG0191980	HORVU.MOREX.r3.3HG0275650
HORVU.MOREX.r3.1HG0033350	HORVU.MOREX.r3.7HG0684180	HORVU.MOREX.r3.6HG0564760	HORVU.MOREX.r3.5HG0423990	HORVU.MOREX.r3.3HG0313180	HORVU.MOREX.r3.2HG0191990	HORVU.MOREX.r3.3HG0275670
HORVU.MOREX.r3.1HG0033380	HORVU.MOREX.r3.7HG0684200	HORVU.MOREX.r3.6HG0564840	HORVU.MOREX.r3.5HG0424010	HORVU.MOREX.r3.3HG0313190	HORVU.MOREX.r3.2HG0192000	HORVU.MOREX.r3.3HG0275680
HORVU.MOREX.r3.1HG0033390	HORVU.MOREX.r3.7HG0684240	HORVU.MOREX.r3.6HG0564870	HORVU.MOREX.r3.5HG0424030	HORVU.MOREX.r3.3HG0313200	HORVU.MOREX.r3.2HG0192050	HORVU.MOREX.r3.3HG0275710
HORVU.MOREX.r3.1HG0033440	HORVU.MOREX.r3.7HG0684300	HORVU.MOREX.r3.6HG0564880	HORVU.MOREX.r3.5HG0424050	HORVU.MOREX.r3.3HG0313210	HORVU.MOREX.r3.2HG0192080	HORVU.MOREX.r3.3HG0275770
HORVU.MOREX.r3.1HG0033470	HORVU.MOREX.r3.7HG0684350	HORVU.MOREX.r3.6HG0564910	HORVU.MOREX.r3.5HG0424060	HORVU.MOREX.r3.3HG0313240	HORVU.MOREX.r3.2HG0192100	HORVU.MOREX.r3.3HG0275790
HORVU.MOREX.r3.1HG0033510	HORVU.MOREX.r3.7HG0684520	HORVU.MOREX.r3.6HG0564930	HORVU.MOREX.r3.5HG0424080	HORVU.MOREX.r3.3HG0313250	HORVU.MOREX.r3.2HG0192120	HORVU.MOREX.r3.3HG0275810
HORVU.MOREX.r3.1HG0033520	HORVU.MOREX.r3.7HG0684530	HORVU.MOREX.r3.6HG0564980	HORVU.MOREX.r3.5HG0424110	HORVU.MOREX.r3.3HG0313260	HORVU.MOREX.r3.2HG0192160	HORVU.MOREX.r3.3HG0275900
HORVU.MOREX.r3.1HG0033530	HORVU.MOREX.r3.7HG0684570	HORVU.MOREX.r3.6HG0565000	HORVU.MOREX.r3.5HG0424130	HORVU.MOREX.r3.3HG0313270	HORVU.MOREX.r3.2HG0192180	HORVU.MOREX.r3.3HG0275910
HORVU.MOREX.r3.1HG0033540	HORVU.MOREX.r3.7HG0684580	HORVU.MOREX.r3.6HG0565030	HORVU.MOREX.r3.5HG0424150	HORVU.MOREX.r3.3HG0313280	HORVU.MOREX.r3.2HG0192190	HORVU.MOREX.r3.3HG0275930
HORVU.MOREX.r3.1HG0033590	HORVU.MOREX.r3.7HG0684610	HORVU.MOREX.r3.6HG0565050	HORVU.MOREX.r3.5HG0424180	HORVU.MOREX.r3.3HG0313300	HORVU.MOREX.r3.2HG0192220	HORVU.MOREX.r3.3HG0275940
HORVU.MOREX.r3.1HG0033620	HORVU.MOREX.r3.7HG0684680	HORVU.MOREX.r3.6HG0565090	HORVU.MOREX.r3.5HG0424230	HORVU.MOREX.r3.3HG0313310	HORVU.MOREX.r3.2HG0192250	HORVU.MOREX.r3.3HG0275950
HORVU.MOREX.r3.1HG0033710	HORVU.MOREX.r3.7HG0684710	HORVU.MOREX.r3.6HG0565120	HORVU.MOREX.r3.5HG0424270	HORVU.MOREX.r3.3HG0313320	HORVU.MOREX.r3.2HG0192270	HORVU.MOREX.r3.3HG0275990
HORVU.MOREX.r3.1HG0033730	HORVU.MOREX.r3.7HG0684780	HORVU.MOREX.r3.6HG0565130	HORVU.MOREX.r3.5HG0424280	HORVU.MOREX.r3.3HG0313370	HORVU.MOREX.r3.2HG0192300	HORVU.MOREX.r3.3HG0276000
HORVU.MOREX.r3.1HG0033780	HORVU.MOREX.r3.7HG0684810	HORVU.MOREX.r3.6HG0565210	HORVU.MOREX.r3.5HG0424290	HORVU.MOREX.r3.3HG0313410	HORVU.MOREX.r3.2HG0192360	HORVU.MOREX.r3.3HG0276050
HORVU.MOREX.r3.1HG0033790	HORVU.MOREX.r3.7HG0684820	HORVU.MOREX.r3.6HG0565230	HORVU.MOREX.r3.5HG0424430	HORVU.MOREX.r3.3HG0313420	HORVU.MOREX.r3.2HG0192380	HORVU.MOREX.r3.3HG0276080
HORVU.MOREX.r3.1HG0033900	HORVU.MOREX.r3.7HG0684830	HORVU.MOREX.r3.6HG0565240	HORVU.MOREX.r3.5HG0424440	HORVU.MOREX.r3.3HG0313430	HORVU.MOREX.r3.2HG0192390	HORVU.MOREX.r3.3HG0276110
HORVU.MOREX.r3.1HG0033920	HORVU.MOREX.r3.7HG0684860	HORVU.MOREX.r3.6HG0565260	HORVU.MOREX.r3.5HG0424470	HORVU.MOREX.r3.3HG0313450	HORVU.MOREX.r3.2HG0192400	HORVU.MOREX.r3.3HG0276120
HORVU.MOREX.r3.1HG0033960	HORVU.MOREX.r3.7HG0684880	HORVU.MOREX.r3.6HG0565330	HORVU.MOREX.r3.5HG0424490	HORVU.MOREX.r3.3HG0313470	HORVU.MOREX.r3.2HG0192410	HORVU.MOREX.r3.3HG0276130
HORVU.MOREX.r3.1HG0033980	HORVU.MOREX.r3.7HG0684890	HORVU.MOREX.r3.6HG0565340	HORVU.MOREX.r3.5HG0424520	HORVU.MOREX.r3.3HG0313480	HORVU.MOREX.r3.2HG0192420	HORVU.MOREX.r3.3HG0276150
HORVU.MOREX.r3.1HG0034050	HORVU.MOREX.r3.7HG0684900	HORVU.MOREX.r3.6HG0565350	HORVU.MOREX.r3.5HG0424540	HORVU.MOREX.r3.3HG0313490	HORVU.MOREX.r3.2HG0192430	HORVU.MOREX.r3.3HG0276160
HORVU.MOREX.r3.1HG0034120	HORVU.MOREX.r3.7HG0684930	HORVU.MOREX.r3.6HG0565360	HORVU.MOREX.r3.5HG0424550	HORVU.MOREX.r3.3HG0313520	HORVU.MOREX.r3.2HG0192440	HORVU.MOREX.r3.3HG0276180
HORVU.MOREX.r3.1HG0034140	HORVU.MOREX.r3.7HG0684940	HORVU.MOREX.r3.6HG0565380	HORVU.MOREX.r3.5HG0424560	HORVU.MOREX.r3.3HG0313560	HORVU.MOREX.r3.2HG0192450	HORVU.MOREX.r3.3HG0276200
HORVU.MOREX.r3.1HG0034230	HORVU.MOREX.r3.7HG0684950	HORVU.MOREX.r3.6HG0565400	HORVU.MOREX.r3.5HG0424570	HORVU.MOREX.r3.3HG0313580	HORVU.MOREX.r3.2HG0192500	HORVU.MOREX.r3.3HG0276210
HORVU.MOREX.r3.1HG0034310	HORVU.MOREX.r3.7HG0684990	HORVU.MOREX.r3.6HG0565410	HORVU.MOREX.r3.5HG0424590	HORVU.MOREX.r3.3HG0313600	HORVU.MOREX.r3.2HG0192510	HORVU.MOREX.r3.3HG0276230
HORVU.MOREX.r3.1HG0034330	HORVU.MOREX.r3.7HG0685200	HORVU.MOREX.r3.6HG0565420	HORVU.MOREX.r3.5HG0424600	HORVU.MOREX.r3.3HG0313620	HORVU.MOREX.r3.2HG0192540	HORVU.MOREX.r3.3HG0276320
HORVU.MOREX.r3.1HG0034340	HORVU.MOREX.r3.7HG0685210	HORVU.MOREX.r3.6HG0565430	HORVU.MOREX.r3.5HG0424630	HORVU.MOREX.r3.3HG0313630	HORVU.MOREX.r3.2HG0192560	HORVU.MOREX.r3.3HG0276340
HORVU.MOREX.r3.1HG0034380	HORVU.MOREX.r3.7HG0685220	HORVU.MOREX.r3.6HG0565450	HORVU.MOREX.r3.5HG0424650	HORVU.MOREX.r3.3HG0313640	HORVU.MOREX.r3.2HG0192590	HORVU.MOREX.r3.3HG0276350
HORVU.MOREX.r3.1HG0034400	HORVU.MOREX.r3.7HG0685230	HORVU.MOREX.r3.6HG0565480	HORVU.MOREX.r3.5HG0424680	HORVU.MOREX.r3.3HG0313650	HORVU.MOREX.r3.2HG0192610	HORVU.MOREX.r3.3HG0276390
HORVU.MOREX.r3.1HG0034480	HORVU.MOREX.r3.7HG0685250	HORVU.MOREX.r3.6HG0565560	HORVU.MOREX.r3.5HG0424710	HORVU.MOREX.r3.3HG0313690	HORVU.MOREX.r3.2HG0192620	HORVU.MOREX.r3.3HG0276400
HORVU.MOREX.r3.1HG0034520	HORVU.MOREX.r3.7HG0685260	HORVU.MOREX.r3.6HG0565570	HORVU.MOREX.r3.5HG0424720	HORVU.MOREX.r3.3HG0313710	HORVU.MOREX.r3.2HG0192630	HORVU.MOREX.r3.3HG0276410
HORVU.MOREX.r3.1HG0034560	HORVU.MOREX.r3.7HG0685270	HORVU.MOREX.r3.6HG0565610	HORVU.MOREX.r3.5HG0424730	HORVU.MOREX.r3.3HG0313730	HORVU.MOREX.r3.2HG0192650	HORVU.MOREX.r3.3HG0276420
HORVU.MOREX.r3.1HG0034570	HORVU.MOREX.r3.7HG0685280	HORVU.MOREX.r3.6HG0565660	HORVU.MOREX.r3.5HG0424740	HORVU.MOREX.r3.3HG0313740	HORVU.MOREX.r3.2HG0192690	HORVU.MOREX.r3.3HG0276430
HORVU.MOREX.r3.1HG0034590	HORVU.MOREX.r3.7HG0685290	HORVU.MOREX.r3.6HG0565670	HORVU.MOREX.r3.5HG0424760	HORVU.MOREX.r3.3HG0313750	HORVU.MOREX.r3.2HG0192750	HORVU.MOREX.r3.3HG0276460
HORVU.MOREX.r3.1HG0034640	HORVU.MOREX.r3.7HG0685300	HORVU.MOREX.r3.6HG0565760	HORVU.MOREX.r3.5HG0424770	HORVU.MOREX.r3.3HG0313760	HORVU.MOREX.r3.2HG0192770	HORVU.MOREX.r3.3HG0276480
HORVU.MOREX.r3.1HG0034670	HORVU.MOREX.r3.7HG0685320	HORVU.MOREX.r3.6HG0565770	HORVU.MOREX.r3.5HG0424800	HORVU.MOREX.r3.3HG0313770	HORVU.MOREX.r3.2HG0192830	HORVU.MOREX.r3.3HG0276500
HORVU.MOREX.r3.1HG0034690	HORVU.MOREX.r3.7HG0685330	HORVU.MOREX.r3.6HG0565790	HORVU.MOREX.r3.5HG0424810	HORVU.MOREX.r3.3HG0313780	HORVU.MOREX.r3.2HG0192840	HORVU.MOREX.r3.3HG0276510
HORVU.MOREX.r3.1HG0034700	HORVU.MOREX.r3.7HG0685350	HORVU.MOREX.r3.6HG0565800	HORVU.MOREX.r3.5HG0424830	HORVU.MOREX.r3.3HG0313790	HORVU.MOREX.r3.2HG0192850	HORVU.MOREX.r3.3HG0276520
HORVU.MOREX.r3.1HG0034760	HORVU.MOREX.r3.7HG0685360	HORVU.MOREX.r3.6HG0565830	HORVU.MOREX.r3.5HG0424850	HORVU.MOREX.r3.3HG0313810	HORVU.MOREX.r3.2HG0192860	HORVU.MOREX.r3.3HG0276570
HORVU.MOREX.r3.1HG0034850	HORVU.MOREX.r3.7HG0685370	HORVU.MOREX.r3.6HG0565880	HORVU.MOREX.r3.5HG0424860	HORVU.MOREX.r3.3HG0313850	HORVU.MOREX.r3.2HG0192880	HORVU.MOREX.r3.3HG0276610
HORVU.MOREX.r3.1HG0034910	HORVU.MOREX.r3.7HG0685410	HORVU.MOREX.r3.6HG0565890	HORVU.MOREX.r3.5HG0424880	HORVU.MOREX.r3.3HG0313860	HORVU.MOREX.r3.2HG0192890	HORVU.MOREX.r3.3HG0276690
HORVU.MOREX.r3.1HG0034950	HORVU.MOREX.r3.7HG0685440	HORVU.MOREX.r3.6HG0565930	HORVU.MOREX.r3.5HG0424890	HORVU.MOREX.r3.3HG0313870	HORVU.MOREX.r3.2HG0192900	HORVU.MOREX.r3.3HG0276710
HORVU.MOREX.r3.1HG0034970	HORVU.MOREX.r3.7HG0685480	HORVU.MOREX.r3.6HG0565940	HORVU.MOREX.r3.5HG0424900	HORVU.MOREX.r3.3HG0313890	HORVU.MOREX.r3.2HG0192910	HORVU.MOREX.r3.3HG0276730
HORVU.MOREX.r3.1HG0034990	HORVU.MOREX.r3.7HG0685490	HORVU.MOREX.r3.6HG0565950	HORVU.MOREX.r3.5HG0424910	HORVU.MOREX.r3.3HG0313900	HORVU.MOREX.r3.2HG0192940	HORVU.MOREX.r3.3HG0276740
HORVU.MOREX.r3.1HG0035100	HORVU.MOREX.r3.7HG0685520	HORVU.MOREX.r3.6HG0565970	HORVU.MOREX.r3.5HG0424940	HORVU.MOREX.r3.3HG0313910	HORVU.MOREX.r3.2HG0192950	HORVU.MOREX.r3.3HG0276810
HORVU.MOREX.r3.1HG0035140	HORVU.MOREX.r3.7HG0685540	HORVU.MOREX.r3.6HG0565980	HORVU.MOREX.r3.5HG0424950	HORVU.MOREX.r3.3HG0313920	HORVU.MOREX.r3.2HG0192960	HORVU.MOREX.r3.3HG0276820
HORVU.MOREX.r3.1HG0035170	HORVU.MOREX.r3.7HG0685550	HORVU.MOREX.r3.6HG0565990	HORVU.MOREX.r3.5HG0424970	HORVU.MOREX.r3.3HG0313930	HORVU.MOREX.r3.2HG0192970	HORVU.MOREX.r3.3HG0276830
HORVU.MOREX.r3.1HG0035230	HORVU.MOREX.r3.7HG0685560	HORVU.MOREX.r3.6HG0566000	HORVU.MOREX.r3.5HG0424980	HORVU.MOREX.r3.3HG0313940	HORVU.MOREX.r3.2HG0192990	HORVU.MOREX.r3.3HG0276840
HORVU.MOREX.r3.1HG0035350	HORVU.MOREX.r3.7HG0685590	HORVU.MOREX.r3.6HG0566020	HORVU.MOREX.r3.5HG0424990	HORVU.MOREX.r3.3HG0313960	HORVU.MOREX.r3.2HG0193000	HORVU.MOREX.r3.3HG0276850
HORVU.MOREX.r3.1HG0035390	HORVU.MOREX.r3.7HG0685600	HORVU.MOREX.r3.6HG0566030	HORVU.MOREX.r3.5HG0425010	HORVU.MOREX.r3.3HG0313970	HORVU.MOREX.r3.2HG0193010	HORVU.MOREX.r3.3HG0276860
HORVU.MOREX.r3.1HG0035400	HORVU.MOREX.r3.7HG0685620	HORVU.MOREX.r3.6HG0566040	HORVU.MOREX.r3.5HG0425020	HORVU.MOREX.r3.3HG0313980	HORVU.MOREX.r3.2HG0193020	HORVU.MOREX.r3.3HG0276870
HORVU.MOREX.r3.1HG0035530	HORVU.MOREX.r3.7HG0685700	HORVU.MOREX.r3.6HG0566050	HORVU.MOREX.r3.5HG0425040	HORVU.MOREX.r3.3HG0313990	HORVU.MOREX.r3.2HG0193030	HORVU.MOREX.r3.3HG0276880
HORVU.MOREX.r3.1HG0035540	HORVU.MOREX.r3.7HG0685760	HORVU.MOREX.r3.6HG0566060	HORVU.MOREX.r3.5HG0425050	HORVU.MOREX.r3.3HG0314000	HORVU.MOREX.r3.2HG0193060	HORVU.MOREX.r3.3HG0276890
HORVU.MOREX.r3.1HG0035550	HORVU.MOREX.r3.7HG0685830	HORVU.MOREX.r3.6HG0566070	HORVU.MOREX.r3.5HG0425060	HORVU.MOREX.r3.3HG0314010	HORVU.MOREX.r3.2HG0193070	HORVU.MOREX.r3.3HG0276900
HORVU.MOREX.r3.1HG0035560	HORVU.MOREX.r3.7HG0685850	HORVU.MOREX.r3.6HG0566100	HORVU.MOREX.r3.5HG0425080	HORVU.MOREX.r3.3HG0314030	HORVU.MOREX.r3.2HG0193080	HORVU.MOREX.r3.3HG0276910
HORVU.MOREX.r3.1HG0035600	HORVU.MOREX.r3.7HG0685870	HORVU.MOREX.r3.6HG0566110	HORVU.MOREX.r3.5HG0425090	HORVU.MOREX.r3.3HG0314040	HORVU.MOREX.r3.2HG0193090	HORVU.MOREX.r3.3HG0276920
HORVU.MOREX.r3.1HG0035650	HORVU.MOREX.r3.7HG0685920	HORVU.MOREX.r3.6HG0566160	HORVU.MOREX.r3.5HG0425110	HORVU.MOREX.r3.3HG0314060	HORVU.MOREX.r3.2HG0193100	HORVU.MOREX.r3.3HG0276930
HORVU.MOREX.r3.1HG0035690	HORVU.MOREX.r3.7HG0685950	HORVU.MOREX.r3.6HG0566170	HORVU.MOREX.r3.5HG0425120	HORVU.MOREX.r3.3HG0314070	HORVU.MOREX.r3.2HG0193110	HORVU.MOREX.r3.3HG0276940
HORVU.MOREX.r3.1HG0035720	HORVU.MOREX.r3.7HG0685960	HORVU.MOREX.r3.6HG0566180	HORVU.MOREX.r3.5HG0425130	HORVU.MOREX.r3.3HG0314110	HORVU.MOREX.r3.2HG0193130	HORVU.MOREX.r3.3HG0276950
HORVU.MOREX.r3.1HG0035740	HORVU.MOREX.r3.7HG0685970	HORVU.MOREX.r3.6HG0566190	HORVU.MOREX.r3.5HG0425160	HORVU.MOREX.r3.3HG0314120	HORVU.MOREX.r3.2HG0193140	HORVU.MOREX.r3.3HG0276960
HORVU.MOREX.r3.1HG0035750	HORVU.MOREX.r3.7HG0686000	HORVU.MOREX.r3.6HG0566200	HORVU.MOREX.r3.5HG0425250	HORVU.MOREX.r3.3HG0314140	HORVU.MOREX.r3.2HG0193160	HORVU.MOREX.r3.3HG0276970
HORVU.MOREX.r3.1HG0035760	HORVU.MOREX.r3.7HG0686010	HORVU.MOREX.r3.6HG0566220	HORVU.MOREX.r3.5HG0425290	HORVU.MOREX.r3.3HG0314150	HORVU.MOREX.r3.2HG0193180	HORVU.MOREX.r3.3HG0276980
HORVU.MOREX.r3.1HG0035770	HORVU.MOREX.r3.7HG0686020	HORVU.MOREX.r3.6HG0566230	HORVU.MOREX.r3.5HG0425310	HORVU.MOREX.r3.3HG0314170	HORVU.MOREX.r3.2HG0193210	HORVU.MOREX.r3.3HG0276990
HORVU.MOREX.r3.1HG0035870	HORVU.MOREX.r3.7HG0686030	HORVU.MOREX.r3.6HG0566240	HORVU.MOREX.r3.5HG0425330	HORVU.MOREX.r3.3HG0314180	HORVU.MOREX.r3.2HG0193220	HORVU.MOREX.r3.3HG0277100
HORVU.MOREX.r3.1HG0035920	HORVU.MOREX.r3.7HG0686090	HORVU.MOREX.r3.6HG0566260	HORVU.MOREX.r3.5HG0425370	HORVU.MOREX.r3.3HG0314190	HORVU.MOREX.r3.2HG0193230	HORVU.MOREX.r3.3HG0277120
HORVU.MOREX.r3.1HG0035980	HORVU.MOREX.r3.7HG0686110	HORVU.MOREX.r3.6HG0566290	HORVU.MOREX.r3.5HG0425420	HORVU.MOREX.r3.3HG0314200	HORVU.MOREX.r3.2HG0193260	HORVU.MOREX.r3.3HG0277140
HORVU.MOREX.r3.1HG0036270	HORVU.MOREX.r3.7HG0686160	HORVU.MOREX.r3.6HG0566300	HORVU.MOREX.r3.5HG0425430	HORVU.MOREX.r3.3HG0314210	HORVU.MOREX.r3.2HG0193280	HORVU.MOREX.r3.3HG0277190
HORVU.MOREX.r3.1HG0036330	HORVU.MOREX.r3.7HG0686250	HORVU.MOREX.r3.6HG0566320	HORVU.MOREX.r3.5HG0425460	HORVU.MOREX.r3.3HG0314220	HORVU.MOREX.r3.2HG0193290	HORVU.MOREX.r3.3HG0277200
HORVU.MOREX.r3.1HG0036370	HORVU.MOREX.r3.7HG0686260	HORVU.MOREX.r3.6HG0566340	HORVU.MOREX.r3.5HG0425480	HORVU.MOREX.r3.3HG0314240	HORVU.MOREX.r3.2HG0193330	HORVU.MOREX.r3.3HG0277230
HORVU.MOREX.r3.1HG0036380	HORVU.MOREX.r3.7HG0686270	HORVU.MOREX.r3.6HG0566420	HORVU.MOREX.r3.5HG0425490	HORVU.MOREX.r3.3HG0314250	HORVU.MOREX.r3.2HG0193340	HORVU.MOREX.r3.3HG0277250
HORVU.MOREX.r3.1HG0036390	HORVU.MOREX.r3.7HG0686300	HORVU.MOREX.r3.6HG0566430	HORVU.MOREX.r3.5HG0425520	HORVU.MOREX.r3.3HG0314270	HORVU.MOREX.r3.2HG0193390	HORVU.MOREX.r3.3HG0277270
HORVU.MOREX.r3.1HG0036400	HORVU.MOREX.r3.7HG0686310	HORVU.MOREX.r3.6HG0566440	HORVU.MOREX.r3.5HG0425540	HORVU.MOREX.r3.3HG0314290	HORVU.MOREX.r3.2HG0193410	HORVU.MOREX.r3.3HG0277320
HORVU.MOREX.r3.1HG0036440	HORVU.MOREX.r3.7HG0686320	HORVU.MOREX.r3.6HG0566460	HORVU.MOREX.r3.5HG0425570	HORVU.MOREX.r3.3HG0314300	HORVU.MOREX.r3.2HG0193430	HORVU.MOREX.r3.3HG0277330
HORVU.MOREX.r3.1HG0036480	HORVU.MOREX.r3.7HG0686330	HORVU.MOREX.r3.6HG0566540	HORVU.MOREX.r3.5HG0425590	HORVU.MOREX.r3.3HG0314320	HORVU.MOREX.r3.2HG0193440	HORVU.MOREX.r3.3HG0277380
HORVU.MOREX.r3.1HG0036490	HORVU.MOREX.r3.7HG0686390	HORVU.MOREX.r3.6HG0566560	HORVU.MOREX.r3.5HG0425610	HORVU.MOREX.r3.3HG0314330	HORVU.MOREX.r3.2HG0193460	HORVU.MOREX.r3.3HG0277390
HORVU.MOREX.r3.1HG0036530	HORVU.MOREX.r3.7HG0686430	HORVU.MOREX.r3.6HG0566570	HORVU.MOREX.r3.5HG0425620	HORVU.MOREX.r3.3HG0314370	HORVU.MOREX.r3.2HG0193470	HORVU.MOREX.r3.3HG0277400
HORVU.MOREX.r3.1HG0036600	HORVU.MOREX.r3.7HG0686440	HORVU.MOREX.r3.6HG0566590	HORVU.MOREX.r3.5HG0425630	HORVU.MOREX.r3.3HG0314380	HORVU.MOREX.r3.2HG0193490	HORVU.MOREX.r3.3HG0277430
HORVU.MOREX.r3.1HG0036620	HORVU.MOREX.r3.7HG0686460	HORVU.MOREX.r3.6HG0566630	HORVU.MOREX.r3.5HG0425640	HORVU.MOREX.r3.3HG0314390	HORVU.MOREX.r3.2HG0193510	HORVU.MOREX.r3.3HG0277570
HORVU.MOREX.r3.1HG0036630	HORVU.MOREX.r3.7HG0686480	HORVU.MOREX.r3.6HG0566680	HORVU.MOREX.r3.5HG0425650	HORVU.MOREX.r3.3HG0314400	HORVU.MOREX.r3.2HG0193530	HORVU.MOREX.r3.3HG0277610
HORVU.MOREX.r3.1HG0036660	HORVU.MOREX.r3.7HG0686490	HORVU.MOREX.r3.6HG0566690	HORVU.MOREX.r3.5HG0425660	HORVU.MOREX.r3.3HG0314420	HORVU.MOREX.r3.2HG0193540	HORVU.MOREX.r3.3HG0277620
HORVU.MOREX.r3.1HG0036770	HORVU.MOREX.r3.7HG0686530	HORVU.MOREX.r3.6HG0566720	HORVU.MOREX.r3.5HG0425670	HORVU.MOREX.r3.3HG0314450	HORVU.MOREX.r3.2HG0193560	HORVU.MOREX.r3.3HG0277640
HORVU.MOREX.r3.1HG0036860	HORVU.MOREX.r3.7HG0686540	HORVU.MOREX.r3.6HG0566790	HORVU.MOREX.r3.5HG0425680	HORVU.MOREX.r3.3HG0314460	HORVU.MOREX.r3.2HG0193570	HORVU.MOREX.r3.3HG0277670
HORVU.MOREX.r3.1HG0036870	HORVU.MOREX.r3.7HG0686550	HORVU.MOREX.r3.6HG0566800	HORVU.MOREX.r3.5HG0425710	HORVU.MOREX.r3.3HG0314470	HORVU.MOREX.r3.2HG0193580	HORVU.MOREX.r3.3HG0277690
HORVU.MOREX.r3.1HG0036930	HORVU.MOREX.r3.7HG0686560	HORVU.MOREX.r3.6HG0566810	HORVU.MOREX.r3.5HG0425730	HORVU.MOREX.r3.3HG0314480	HORVU.MOREX.r3.2HG0193600	HORVU.MOREX.r3.3HG0277700
HORVU.MOREX.r3.1HG0037010	HORVU.MOREX.r3.7HG0686570	HORVU.MOREX.r3.6HG0566830	HORVU.MOREX.r3.5HG0425750	HORVU.MOREX.r3.3HG0314490	HORVU.MOREX.r3.2HG0193610	HORVU.MOREX.r3.3HG0277710
HORVU.MOREX.r3.1HG0037020	HORVU.MOREX.r3.7HG0686580	HORVU.MOREX.r3.6HG0566850	HORVU.MOREX.r3.5HG0425790	HORVU.MOREX.r3.3HG0314500	HORVU.MOREX.r3.2HG0193640	HORVU.MOREX.r3.3HG0277750
HORVU.MOREX.r3.1HG0037180	HORVU.MOREX.r3.7HG0686670	HORVU.MOREX.r3.6HG0566890	HORVU.MOREX.r3.5HG0425800	HORVU.MOREX.r3.3HG0314510	HORVU.MOREX.r3.2HG0193650	HORVU.MOREX.r3.3HG0277760
HORVU.MOREX.r3.1HG0037200	HORVU.MOREX.r3.7HG0686690	HORVU.MOREX.r3.6HG0566900	HORVU.MOREX.r3.5HG0425810	HORVU.MOREX.r3.3HG0314530	HORVU.MOREX.r3.2HG0193660	HORVU.MOREX.r3.3HG0277770
HORVU.MOREX.r3.1HG0037210	HORVU.MOREX.r3.7HG0686710	HORVU.MOREX.r3.6HG0566930	HORVU.MOREX.r3.5HG0425880	HORVU.MOREX.r3.3HG0314560	HORVU.MOREX.r3.2HG0193690	HORVU.MOREX.r3.3HG0277810
HORVU.MOREX.r3.1HG0037250	HORVU.MOREX.r3.7HG0686730	HORVU.MOREX.r3.6HG0566940	HORVU.MOREX.r3.5HG0425910	HORVU.MOREX.r3.3HG0314570	HORVU.MOREX.r3.2HG0193700	HORVU.MOREX.r3.3HG0277850
HORVU.MOREX.r3.1HG0037270	HORVU.MOREX.r3.7HG0686750	HORVU.MOREX.r3.6HG0566970	HORVU.MOREX.r3.5HG0425920	HORVU.MOREX.r3.3HG0314590	HORVU.MOREX.r3.2HG0193710	HORVU.MOREX.r3.3HG0277860
HORVU.MOREX.r3.1HG0037440	HORVU.MOREX.r3.7HG0686780	HORVU.MOREX.r3.6HG0567000	HORVU.MOREX.r3.5HG0425930	HORVU.MOREX.r3.3HG0314600	HORVU.MOREX.r3.2HG0193730	HORVU.MOREX.r3.3HG0277870
HORVU.MOREX.r3.1HG0037490	HORVU.MOREX.r3.7HG0686790	HORVU.MOREX.r3.6HG0567010	HORVU.MOREX.r3.5HG0425940	HORVU.MOREX.r3.3HG0314610	HORVU.MOREX.r3.2HG0193750	HORVU.MOREX.r3.3HG0277880
HORVU.MOREX.r3.1HG0037500	HORVU.MOREX.r3.7HG0686800	HORVU.MOREX.r3.6HG0567020	HORVU.MOREX.r3.5HG0425950	HORVU.MOREX.r3.3HG0314650	HORVU.MOREX.r3.2HG0193770	HORVU.MOREX.r3.3HG0277890
HORVU.MOREX.r3.1HG0037530	HORVU.MOREX.r3.7HG0686830	HORVU.MOREX.r3.6HG0567030	HORVU.MOREX.r3.5HG0425980	HORVU.MOREX.r3.3HG0314660	HORVU.MOREX.r3.2HG0193780	HORVU.MOREX.r3.3HG0277900
HORVU.MOREX.r3.1HG0037550	HORVU.MOREX.r3.7HG0686840	HORVU.MOREX.r3.6HG0567040	HORVU.MOREX.r3.5HG0425990	HORVU.MOREX.r3.3HG0314690	HORVU.MOREX.r3.2HG0193790	HORVU.MOREX.r3.3HG0277910
HORVU.MOREX.r3.1HG0037560	HORVU.MOREX.r3.7HG0686880	HORVU.MOREX.r3.6HG0567050	HORVU.MOREX.r3.5HG0426000	HORVU.MOREX.r3.3HG0314710	HORVU.MOREX.r3.2HG0193800	HORVU.MOREX.r3.3HG0277980
HORVU.MOREX.r3.1HG0037610	HORVU.MOREX.r3.7HG0686900	HORVU.MOREX.r3.6HG0567060	HORVU.MOREX.r3.5HG0426010	HORVU.MOREX.r3.3HG0314720	HORVU.MOREX.r3.2HG0193810	HORVU.MOREX.r3.3HG0278050
HORVU.MOREX.r3.1HG0037620	HORVU.MOREX.r3.7HG0686910	HORVU.MOREX.r3.6HG0567090	HORVU.MOREX.r3.5HG0426030	HORVU.MOREX.r3.3HG0314730	HORVU.MOREX.r3.2HG0193820	HORVU.MOREX.r3.3HG0278110
HORVU.MOREX.r3.1HG0037640	HORVU.MOREX.r3.7HG0686920	HORVU.MOREX.r3.6HG0567100	HORVU.MOREX.r3.5HG0426040	HORVU.MOREX.r3.3HG0314740	HORVU.MOREX.r3.2HG0193840	HORVU.MOREX.r3.3HG0278120
HORVU.MOREX.r3.1HG0037670	HORVU.MOREX.r3.7HG0686930	HORVU.MOREX.r3.6HG0567110	HORVU.MOREX.r3.5HG0426050	HORVU.MOREX.r3.3HG0314750	HORVU.MOREX.r3.2HG0193850	HORVU.MOREX.r3.3HG0278130
HORVU.MOREX.r3.1HG0037710	HORVU.MOREX.r3.7HG0686940	HORVU.MOREX.r3.6HG0567120	HORVU.MOREX.r3.5HG0426060	HORVU.MOREX.r3.3HG0314760	HORVU.MOREX.r3.2HG0193880	HORVU.MOREX.r3.3HG0278140
HORVU.MOREX.r3.1HG0037770	HORVU.MOREX.r3.7HG0686950	HORVU.MOREX.r3.6HG0567140	HORVU.MOREX.r3.5HG0426110	HORVU.MOREX.r3.3HG0314770	HORVU.MOREX.r3.2HG0193900	HORVU.MOREX.r3.3HG0278170
HORVU.MOREX.r3.1HG0037780	HORVU.MOREX.r3.7HG0686960	HORVU.MOREX.r3.6HG0567150	HORVU.MOREX.r3.5HG0426130	HORVU.MOREX.r3.3HG0314780	HORVU.MOREX.r3.2HG0193910	HORVU.MOREX.r3.3HG0278190
HORVU.MOREX.r3.1HG0037800	HORVU.MOREX.r3.7HG0686980	HORVU.MOREX.r3.6HG0567160	HORVU.MOREX.r3.5HG0426140	HORVU.MOREX.r3.3HG0314810	HORVU.MOREX.r3.2HG0193920	HORVU.MOREX.r3.3HG0278210
HORVU.MOREX.r3.1HG0037890	HORVU.MOREX.r3.7HG0687040	HORVU.MOREX.r3.6HG0567180	HORVU.MOREX.r3.5HG0426160	HORVU.MOREX.r3.3HG0314840	HORVU.MOREX.r3.2HG0193930	HORVU.MOREX.r3.3HG0278220
HORVU.MOREX.r3.1HG0037920	HORVU.MOREX.r3.7HG0687050	HORVU.MOREX.r3.6HG0567190	HORVU.MOREX.r3.5HG0426180	HORVU.MOREX.r3.3HG0314850	HORVU.MOREX.r3.2HG0193950	HORVU.MOREX.r3.3HG0278230
HORVU.MOREX.r3.1HG0037930	HORVU.MOREX.r3.7HG0687070	HORVU.MOREX.r3.6HG0567200	HORVU.MOREX.r3.5HG0426210	HORVU.MOREX.r3.3HG0314860	HORVU.MOREX.r3.2HG0193990	HORVU.MOREX.r3.3HG0278270
HORVU.MOREX.r3.1HG0037960	HORVU.MOREX.r3.7HG0687080	HORVU.MOREX.r3.6HG0567230	HORVU.MOREX.r3.5HG0426220	HORVU.MOREX.r3.3HG0314880	HORVU.MOREX.r3.2HG0194000	HORVU.MOREX.r3.3HG0278320
HORVU.MOREX.r3.1HG0037990	HORVU.MOREX.r3.7HG0687190	HORVU.MOREX.r3.6HG0567250	HORVU.MOREX.r3.5HG0426240	HORVU.MOREX.r3.3HG0314900	HORVU.MOREX.r3.2HG0194010	HORVU.MOREX.r3.3HG0278360
HORVU.MOREX.r3.1HG0038000	HORVU.MOREX.r3.7HG0687210	HORVU.MOREX.r3.6HG0567270	HORVU.MOREX.r3.5HG0426250	HORVU.MOREX.r3.3HG0314930	HORVU.MOREX.r3.2HG0194030	HORVU.MOREX.r3.3HG0278400
HORVU.MOREX.r3.1HG0038010	HORVU.MOREX.r3.7HG0687250	HORVU.MOREX.r3.6HG0567330	HORVU.MOREX.r3.5HG0426260	HORVU.MOREX.r3.3HG0314950	HORVU.MOREX.r3.2HG0194050	HORVU.MOREX.r3.3HG0278430
HORVU.MOREX.r3.1HG0038070	HORVU.MOREX.r3.7HG0687260	HORVU.MOREX.r3.6HG0567350	HORVU.MOREX.r3.5HG0426280	HORVU.MOREX.r3.3HG0314970	HORVU.MOREX.r3.2HG0194100	HORVU.MOREX.r3.3HG0278460
HORVU.MOREX.r3.1HG0038080	HORVU.MOREX.r3.7HG0687350	HORVU.MOREX.r3.6HG0567370	HORVU.MOREX.r3.5HG0426290	HORVU.MOREX.r3.3HG0315000	HORVU.MOREX.r3.2HG0194110	HORVU.MOREX.r3.3HG0278470
HORVU.MOREX.r3.1HG0038100	HORVU.MOREX.r3.7HG0687380	HORVU.MOREX.r3.6HG0567390	HORVU.MOREX.r3.5HG0426300	HORVU.MOREX.r3.3HG0315010	HORVU.MOREX.r3.2HG0194120	HORVU.MOREX.r3.3HG0278480
HORVU.MOREX.r3.1HG0038120	HORVU.MOREX.r3.7HG0687420	HORVU.MOREX.r3.6HG0567400	HORVU.MOREX.r3.5HG0426330	HORVU.MOREX.r3.3HG0315050	HORVU.MOREX.r3.2HG0194130	HORVU.MOREX.r3.3HG0278490
HORVU.MOREX.r3.1HG0038140	HORVU.MOREX.r3.7HG0687430	HORVU.MOREX.r3.6HG0567430	HORVU.MOREX.r3.5HG0426340	HORVU.MOREX.r3.3HG0315070	HORVU.MOREX.r3.2HG0194150	HORVU.MOREX.r3.3HG0278520
HORVU.MOREX.r3.1HG0038160	HORVU.MOREX.r3.7HG0687450	HORVU.MOREX.r3.6HG0567450	HORVU.MOREX.r3.5HG0426350	HORVU.MOREX.r3.3HG0315080	HORVU.MOREX.r3.2HG0194180	HORVU.MOREX.r3.3HG0278540
HORVU.MOREX.r3.1HG0038170	HORVU.MOREX.r3.7HG0687460	HORVU.MOREX.r3.6HG0567460	HORVU.MOREX.r3.5HG0426380	HORVU.MOREX.r3.3HG0315090	HORVU.MOREX.r3.2HG0194200	HORVU.MOREX.r3.3HG0278550
HORVU.MOREX.r3.1HG0038190	HORVU.MOREX.r3.7HG0687470	HORVU.MOREX.r3.6HG0567470	HORVU.MOREX.r3.5HG0426390	HORVU.MOREX.r3.3HG0315100	HORVU.MOREX.r3.2HG0194210	HORVU.MOREX.r3.3HG0278560
HORVU.MOREX.r3.1HG0038220	HORVU.MOREX.r3.7HG0687480	HORVU.MOREX.r3.6HG0567490	HORVU.MOREX.r3.5HG0426410	HORVU.MOREX.r3.3HG0315110	HORVU.MOREX.r3.2HG0194220	HORVU.MOREX.r3.3HG0278570
HORVU.MOREX.r3.1HG0038230	HORVU.MOREX.r3.7HG0687490	HORVU.MOREX.r3.6HG0567500	HORVU.MOREX.r3.5HG0426430	HORVU.MOREX.r3.3HG0315120	HORVU.MOREX.r3.2HG0194230	HORVU.MOREX.r3.3HG0278610
HORVU.MOREX.r3.1HG0038240	HORVU.MOREX.r3.7HG0687500	HORVU.MOREX.r3.6HG0567520	HORVU.MOREX.r3.5HG0426450	HORVU.MOREX.r3.3HG0315130	HORVU.MOREX.r3.2HG0194240	HORVU.MOREX.r3.3HG0278630
HORVU.MOREX.r3.1HG0038460	HORVU.MOREX.r3.7HG0687510	HORVU.MOREX.r3.6HG0567530	HORVU.MOREX.r3.5HG0426460	HORVU.MOREX.r3.3HG0315150	HORVU.MOREX.r3.2HG0194250	HORVU.MOREX.r3.3HG0278640
HORVU.MOREX.r3.1HG0038470	HORVU.MOREX.r3.7HG0687530	HORVU.MOREX.r3.6HG0567600	HORVU.MOREX.r3.5HG0426480	HORVU.MOREX.r3.3HG0315170	HORVU.MOREX.r3.2HG0194260	HORVU.MOREX.r3.3HG0278650
HORVU.MOREX.r3.1HG0038550	HORVU.MOREX.r3.7HG0687540	HORVU.MOREX.r3.6HG0567630	HORVU.MOREX.r3.5HG0426510	HORVU.MOREX.r3.3HG0315180	HORVU.MOREX.r3.2HG0194280	HORVU.MOREX.r3.3HG0278670
HORVU.MOREX.r3.1HG0038580	HORVU.MOREX.r3.7HG0687560	HORVU.MOREX.r3.6HG0567660	HORVU.MOREX.r3.5HG0426520	HORVU.MOREX.r3.3HG0315190	HORVU.MOREX.r3.2HG0194310	HORVU.MOREX.r3.3HG0278710
HORVU.MOREX.r3.1HG0038590	HORVU.MOREX.r3.7HG0687590	HORVU.MOREX.r3.6HG0567670	HORVU.MOREX.r3.5HG0426530	HORVU.MOREX.r3.3HG0315200	HORVU.MOREX.r3.2HG0194320	HORVU.MOREX.r3.3HG0278750
HORVU.MOREX.r3.1HG0038600	HORVU.MOREX.r3.7HG0687600	HORVU.MOREX.r3.6HG0567780	HORVU.MOREX.r3.5HG0426640	HORVU.MOREX.r3.3HG0315210	HORVU.MOREX.r3.2HG0194350	HORVU.MOREX.r3.3HG0278760
HORVU.MOREX.r3.1HG0038620	HORVU.MOREX.r3.7HG0687630	HORVU.MOREX.r3.6HG0567800	HORVU.MOREX.r3.5HG0426690	HORVU.MOREX.r3.3HG0315220	HORVU.MOREX.r3.2HG0194360	HORVU.MOREX.r3.3HG0278780
HORVU.MOREX.r3.1HG0038630	HORVU.MOREX.r3.7HG0687640	HORVU.MOREX.r3.6HG0568070	HORVU.MOREX.r3.5HG0426750	HORVU.MOREX.r3.3HG0315250	HORVU.MOREX.r3.2HG0194370	HORVU.MOREX.r3.3HG0278790
HORVU.MOREX.r3.1HG0038640	HORVU.MOREX.r3.7HG0687680	HORVU.MOREX.r3.6HG0568090	HORVU.MOREX.r3.5HG0426780	HORVU.MOREX.r3.3HG0315260	HORVU.MOREX.r3.2HG0194390	HORVU.MOREX.r3.3HG0278840
HORVU.MOREX.r3.1HG0038650	HORVU.MOREX.r3.7HG0687750	HORVU.MOREX.r3.6HG0568130	HORVU.MOREX.r3.5HG0426790	HORVU.MOREX.r3.3HG0315270	HORVU.MOREX.r3.2HG0194450	HORVU.MOREX.r3.3HG0278880
HORVU.MOREX.r3.1HG0038710	HORVU.MOREX.r3.7HG0687760	HORVU.MOREX.r3.6HG0568140	HORVU.MOREX.r3.5HG0426820	HORVU.MOREX.r3.3HG0315280	HORVU.MOREX.r3.2HG0194460	HORVU.MOREX.r3.3HG0278890
HORVU.MOREX.r3.1HG0038720	HORVU.MOREX.r3.7HG0687790	HORVU.MOREX.r3.6HG0568170	HORVU.MOREX.r3.5HG0426840	HORVU.MOREX.r3.3HG0315300	HORVU.MOREX.r3.2HG0194480	HORVU.MOREX.r3.3HG0279020
HORVU.MOREX.r3.1HG0038740	HORVU.MOREX.r3.7HG0687860	HORVU.MOREX.r3.6HG0568190	HORVU.MOREX.r3.5HG0426890	HORVU.MOREX.r3.3HG0315310	HORVU.MOREX.r3.2HG0194490	HORVU.MOREX.r3.3HG0279030
HORVU.MOREX.r3.1HG0038750	HORVU.MOREX.r3.7HG0687900	HORVU.MOREX.r3.6HG0568230	HORVU.MOREX.r3.5HG0426900	HORVU.MOREX.r3.3HG0315320	HORVU.MOREX.r3.2HG0194500	HORVU.MOREX.r3.3HG0279040
HORVU.MOREX.r3.1HG0038760	HORVU.MOREX.r3.7HG0687920	HORVU.MOREX.r3.6HG0568240	HORVU.MOREX.r3.5HG0426910	HORVU.MOREX.r3.3HG0315350	HORVU.MOREX.r3.2HG0194520	HORVU.MOREX.r3.3HG0279070
HORVU.MOREX.r3.1HG0038780	HORVU.MOREX.r3.7HG0687930	HORVU.MOREX.r3.6HG0568250	HORVU.MOREX.r3.5HG0427030	HORVU.MOREX.r3.3HG0315360	HORVU.MOREX.r3.2HG0194530	HORVU.MOREX.r3.3HG0279100
HORVU.MOREX.r3.1HG0038790	HORVU.MOREX.r3.7HG0687940	HORVU.MOREX.r3.6HG0568290	HORVU.MOREX.r3.5HG0427040	HORVU.MOREX.r3.3HG0315380	HORVU.MOREX.r3.2HG0194540	HORVU.MOREX.r3.3HG0279110
HORVU.MOREX.r3.1HG0038800	HORVU.MOREX.r3.7HG0687960	HORVU.MOREX.r3.6HG0568300	HORVU.MOREX.r3.5HG0427070	HORVU.MOREX.r3.3HG0315390	HORVU.MOREX.r3.2HG0194550	HORVU.MOREX.r3.3HG0279160
HORVU.MOREX.r3.1HG0038820	HORVU.MOREX.r3.7HG0687970	HORVU.MOREX.r3.6HG0568340	HORVU.MOREX.r3.5HG0427080	HORVU.MOREX.r3.3HG0315410	HORVU.MOREX.r3.2HG0194560	HORVU.MOREX.r3.3HG0279170
HORVU.MOREX.r3.1HG0038900	HORVU.MOREX.r3.7HG0687980	HORVU.MOREX.r3.6HG0568360	HORVU.MOREX.r3.5HG0427090	HORVU.MOREX.r3.3HG0315420	HORVU.MOREX.r3.2HG0194580	HORVU.MOREX.r3.3HG0279190
HORVU.MOREX.r3.1HG0038930	HORVU.MOREX.r3.7HG0688020	HORVU.MOREX.r3.6HG0568380	HORVU.MOREX.r3.5HG0427110	HORVU.MOREX.r3.3HG0315430	HORVU.MOREX.r3.2HG0194600	HORVU.MOREX.r3.3HG0279210
HORVU.MOREX.r3.1HG0038960	HORVU.MOREX.r3.7HG0688040	HORVU.MOREX.r3.6HG0568390	HORVU.MOREX.r3.5HG0427120	HORVU.MOREX.r3.3HG0315530	HORVU.MOREX.r3.2HG0194610	HORVU.MOREX.r3.3HG0279250
HORVU.MOREX.r3.1HG0038980	HORVU.MOREX.r3.7HG0688050	HORVU.MOREX.r3.6HG0568400	HORVU.MOREX.r3.5HG0427150	HORVU.MOREX.r3.3HG0315540	HORVU.MOREX.r3.2HG0194620	HORVU.MOREX.r3.3HG0279260
HORVU.MOREX.r3.1HG0038990	HORVU.MOREX.r3.7HG0688080	HORVU.MOREX.r3.6HG0568410	HORVU.MOREX.r3.5HG0427160	HORVU.MOREX.r3.3HG0315570	HORVU.MOREX.r3.2HG0194630	HORVU.MOREX.r3.3HG0279280
HORVU.MOREX.r3.1HG0039000	HORVU.MOREX.r3.7HG0688110	HORVU.MOREX.r3.6HG0568420	HORVU.MOREX.r3.5HG0427210	HORVU.MOREX.r3.3HG0315580	HORVU.MOREX.r3.2HG0194640	HORVU.MOREX.r3.3HG0279300
HORVU.MOREX.r3.1HG0039050	HORVU.MOREX.r3.7HG0688270	HORVU.MOREX.r3.6HG0568450	HORVU.MOREX.r3.5HG0427220	HORVU.MOREX.r3.3HG0315590	HORVU.MOREX.r3.2HG0194650	HORVU.MOREX.r3.3HG0279310
HORVU.MOREX.r3.1HG0039060	HORVU.MOREX.r3.7HG0688280	HORVU.MOREX.r3.6HG0568470	HORVU.MOREX.r3.5HG0427230	HORVU.MOREX.r3.3HG0315620	HORVU.MOREX.r3.2HG0194660	HORVU.MOREX.r3.3HG0279320
HORVU.MOREX.r3.1HG0039070	HORVU.MOREX.r3.7HG0688300	HORVU.MOREX.r3.6HG0568480	HORVU.MOREX.r3.5HG0427240	HORVU.MOREX.r3.3HG0315640	HORVU.MOREX.r3.2HG0194690	HORVU.MOREX.r3.3HG0279330
HORVU.MOREX.r3.1HG0039090	HORVU.MOREX.r3.7HG0688310	HORVU.MOREX.r3.6HG0568500	HORVU.MOREX.r3.5HG0427250	HORVU.MOREX.r3.3HG0315650	HORVU.MOREX.r3.2HG0194700	HORVU.MOREX.r3.3HG0279360
HORVU.MOREX.r3.1HG0039110	HORVU.MOREX.r3.7HG0688330	HORVU.MOREX.r3.6HG0568510	HORVU.MOREX.r3.5HG0427270	HORVU.MOREX.r3.3HG0315660	HORVU.MOREX.r3.2HG0194710	HORVU.MOREX.r3.3HG0279370
HORVU.MOREX.r3.1HG0039130	HORVU.MOREX.r3.7HG0688380	HORVU.MOREX.r3.6HG0568520	HORVU.MOREX.r3.5HG0427280	HORVU.MOREX.r3.3HG0315670	HORVU.MOREX.r3.2HG0194750	HORVU.MOREX.r3.3HG0279380
HORVU.MOREX.r3.1HG0039150	HORVU.MOREX.r3.7HG0688400	HORVU.MOREX.r3.6HG0568530	HORVU.MOREX.r3.5HG0427290	HORVU.MOREX.r3.3HG0315690	HORVU.MOREX.r3.2HG0194760	HORVU.MOREX.r3.3HG0279390
HORVU.MOREX.r3.1HG0039160	HORVU.MOREX.r3.7HG0688410	HORVU.MOREX.r3.6HG0568570	HORVU.MOREX.r3.5HG0427370	HORVU.MOREX.r3.3HG0315730	HORVU.MOREX.r3.2HG0194770	HORVU.MOREX.r3.3HG0279410
HORVU.MOREX.r3.1HG0039170	HORVU.MOREX.r3.7HG0688550	HORVU.MOREX.r3.6HG0568580	HORVU.MOREX.r3.5HG0427390	HORVU.MOREX.r3.3HG0315750	HORVU.MOREX.r3.2HG0194780	HORVU.MOREX.r3.3HG0279420
HORVU.MOREX.r3.1HG0039180	HORVU.MOREX.r3.7HG0688570	HORVU.MOREX.r3.6HG0568590	HORVU.MOREX.r3.5HG0427400	HORVU.MOREX.r3.3HG0315760	HORVU.MOREX.r3.2HG0194790	HORVU.MOREX.r3.3HG0279430
HORVU.MOREX.r3.1HG0039190	HORVU.MOREX.r3.7HG0688580	HORVU.MOREX.r3.6HG0568640	HORVU.MOREX.r3.5HG0427440	HORVU.MOREX.r3.3HG0315810	HORVU.MOREX.r3.2HG0194810	HORVU.MOREX.r3.3HG0279470
HORVU.MOREX.r3.1HG0039210	HORVU.MOREX.r3.7HG0688610	HORVU.MOREX.r3.6HG0568690	HORVU.MOREX.r3.5HG0427450	HORVU.MOREX.r3.3HG0315900	HORVU.MOREX.r3.2HG0194820	HORVU.MOREX.r3.3HG0279500
HORVU.MOREX.r3.1HG0039220	HORVU.MOREX.r3.7HG0688620	HORVU.MOREX.r3.6HG0568720	HORVU.MOREX.r3.5HG0427460	HORVU.MOREX.r3.3HG0315910	HORVU.MOREX.r3.2HG0194850	HORVU.MOREX.r3.3HG0279530
HORVU.MOREX.r3.1HG0039230	HORVU.MOREX.r3.7HG0688640	HORVU.MOREX.r3.6HG0568740	HORVU.MOREX.r3.5HG0427470	HORVU.MOREX.r3.3HG0315930	HORVU.MOREX.r3.2HG0194880	HORVU.MOREX.r3.3HG0279560
HORVU.MOREX.r3.1HG0039240	HORVU.MOREX.r3.7HG0688690	HORVU.MOREX.r3.6HG0568750	HORVU.MOREX.r3.5HG0427480	HORVU.MOREX.r3.3HG0315990	HORVU.MOREX.r3.2HG0194890	HORVU.MOREX.r3.3HG0279570
HORVU.MOREX.r3.1HG0039350	HORVU.MOREX.r3.7HG0688720	HORVU.MOREX.r3.6HG0568780	HORVU.MOREX.r3.5HG0427490	HORVU.MOREX.r3.3HG0316000	HORVU.MOREX.r3.2HG0194900	HORVU.MOREX.r3.3HG0279580
HORVU.MOREX.r3.1HG0039360	HORVU.MOREX.r3.7HG0688730	HORVU.MOREX.r3.6HG0568820	HORVU.MOREX.r3.5HG0427500	HORVU.MOREX.r3.3HG0316010	HORVU.MOREX.r3.2HG0194910	HORVU.MOREX.r3.3HG0279600
HORVU.MOREX.r3.1HG0039370	HORVU.MOREX.r3.7HG0688780	HORVU.MOREX.r3.6HG0568830	HORVU.MOREX.r3.5HG0427510	HORVU.MOREX.r3.3HG0316020	HORVU.MOREX.r3.2HG0194920	HORVU.MOREX.r3.3HG0279610
HORVU.MOREX.r3.1HG0039410	HORVU.MOREX.r3.7HG0688870	HORVU.MOREX.r3.6HG0568860	HORVU.MOREX.r3.5HG0427520	HORVU.MOREX.r3.3HG0316030	HORVU.MOREX.r3.2HG0194930	HORVU.MOREX.r3.3HG0279620
HORVU.MOREX.r3.1HG0039430	HORVU.MOREX.r3.7HG0688880	HORVU.MOREX.r3.6HG0568870	HORVU.MOREX.r3.5HG0427530	HORVU.MOREX.r3.3HG0316060	HORVU.MOREX.r3.2HG0194940	HORVU.MOREX.r3.3HG0279630
HORVU.MOREX.r3.1HG0039450	HORVU.MOREX.r3.7HG0688900	HORVU.MOREX.r3.6HG0568880	HORVU.MOREX.r3.5HG0427540	HORVU.MOREX.r3.3HG0316070	HORVU.MOREX.r3.2HG0194950	HORVU.MOREX.r3.3HG0279650
HORVU.MOREX.r3.1HG0039460	HORVU.MOREX.r3.7HG0688930	HORVU.MOREX.r3.6HG0568900	HORVU.MOREX.r3.5HG0427550	HORVU.MOREX.r3.3HG0316080	HORVU.MOREX.r3.2HG0194960	HORVU.MOREX.r3.3HG0279700
HORVU.MOREX.r3.1HG0039490	HORVU.MOREX.r3.7HG0688940	HORVU.MOREX.r3.6HG0568910	HORVU.MOREX.r3.5HG0427560	HORVU.MOREX.r3.3HG0316100	HORVU.MOREX.r3.2HG0194970	HORVU.MOREX.r3.3HG0279710
HORVU.MOREX.r3.1HG0039560	HORVU.MOREX.r3.7HG0688950	HORVU.MOREX.r3.6HG0568920	HORVU.MOREX.r3.5HG0427570	HORVU.MOREX.r3.3HG0316110	HORVU.MOREX.r3.2HG0195010	HORVU.MOREX.r3.3HG0279730
HORVU.MOREX.r3.1HG0039590	HORVU.MOREX.r3.7HG0689010	HORVU.MOREX.r3.6HG0569030	HORVU.MOREX.r3.5HG0427590	HORVU.MOREX.r3.3HG0316120	HORVU.MOREX.r3.2HG0195020	HORVU.MOREX.r3.3HG0279750
HORVU.MOREX.r3.1HG0039670	HORVU.MOREX.r3.7HG0689040	HORVU.MOREX.r3.6HG0569040	HORVU.MOREX.r3.5HG0427600	HORVU.MOREX.r3.3HG0316130	HORVU.MOREX.r3.2HG0195030	HORVU.MOREX.r3.3HG0279760
HORVU.MOREX.r3.1HG0039730	HORVU.MOREX.r3.7HG0689050	HORVU.MOREX.r3.6HG0569090	HORVU.MOREX.r3.5HG0427650	HORVU.MOREX.r3.3HG0316160	HORVU.MOREX.r3.2HG0195060	HORVU.MOREX.r3.3HG0279820
HORVU.MOREX.r3.1HG0039740	HORVU.MOREX.r3.7HG0689130	HORVU.MOREX.r3.6HG0569280	HORVU.MOREX.r3.5HG0427690	HORVU.MOREX.r3.3HG0316200	HORVU.MOREX.r3.2HG0195070	HORVU.MOREX.r3.3HG0279840
HORVU.MOREX.r3.1HG0039840	HORVU.MOREX.r3.7HG0689150	HORVU.MOREX.r3.6HG0569310	HORVU.MOREX.r3.5HG0427700	HORVU.MOREX.r3.3HG0316210	HORVU.MOREX.r3.2HG0195080	HORVU.MOREX.r3.3HG0279880
HORVU.MOREX.r3.1HG0039860	HORVU.MOREX.r3.7HG0689170	HORVU.MOREX.r3.6HG0569320	HORVU.MOREX.r3.5HG0427730	HORVU.MOREX.r3.3HG0316220	HORVU.MOREX.r3.2HG0195090	HORVU.MOREX.r3.3HG0279920
HORVU.MOREX.r3.1HG0039870	HORVU.MOREX.r3.7HG0689200	HORVU.MOREX.r3.6HG0569380	HORVU.MOREX.r3.5HG0427760	HORVU.MOREX.r3.3HG0316230	HORVU.MOREX.r3.2HG0195100	HORVU.MOREX.r3.3HG0279930
HORVU.MOREX.r3.1HG0039900	HORVU.MOREX.r3.7HG0689210	HORVU.MOREX.r3.6HG0569410	HORVU.MOREX.r3.5HG0427770	HORVU.MOREX.r3.3HG0316240	HORVU.MOREX.r3.2HG0195110	HORVU.MOREX.r3.3HG0279940
HORVU.MOREX.r3.1HG0039910	HORVU.MOREX.r3.7HG0689220	HORVU.MOREX.r3.6HG0569440	HORVU.MOREX.r3.5HG0427780	HORVU.MOREX.r3.3HG0316250	HORVU.MOREX.r3.2HG0195120	HORVU.MOREX.r3.3HG0279950
HORVU.MOREX.r3.1HG0039920	HORVU.MOREX.r3.7HG0689240	HORVU.MOREX.r3.6HG0569450	HORVU.MOREX.r3.5HG0427800	HORVU.MOREX.r3.3HG0316260	HORVU.MOREX.r3.2HG0195130	HORVU.MOREX.r3.3HG0280030
HORVU.MOREX.r3.1HG0039930	HORVU.MOREX.r3.7HG0689300	HORVU.MOREX.r3.6HG0569480	HORVU.MOREX.r3.5HG0427830	HORVU.MOREX.r3.3HG0316280	HORVU.MOREX.r3.2HG0195140	HORVU.MOREX.r3.3HG0280050
HORVU.MOREX.r3.1HG0039940	HORVU.MOREX.r3.7HG0689310	HORVU.MOREX.r3.6HG0569490	HORVU.MOREX.r3.5HG0427840	HORVU.MOREX.r3.3HG0316290	HORVU.MOREX.r3.2HG0195150	HORVU.MOREX.r3.3HG0280060
HORVU.MOREX.r3.1HG0039960	HORVU.MOREX.r3.7HG0689320	HORVU.MOREX.r3.6HG0569510	HORVU.MOREX.r3.5HG0427880	HORVU.MOREX.r3.3HG0316370	HORVU.MOREX.r3.2HG0195180	HORVU.MOREX.r3.3HG0280090
HORVU.MOREX.r3.1HG0039980	HORVU.MOREX.r3.7HG0689340	HORVU.MOREX.r3.6HG0569520	HORVU.MOREX.r3.5HG0427890	HORVU.MOREX.r3.3HG0316450	HORVU.MOREX.r3.2HG0195190	HORVU.MOREX.r3.3HG0280120
HORVU.MOREX.r3.1HG0040000	HORVU.MOREX.r3.7HG0689350	HORVU.MOREX.r3.6HG0569540	HORVU.MOREX.r3.5HG0427910	HORVU.MOREX.r3.3HG0316460	HORVU.MOREX.r3.2HG0195200	HORVU.MOREX.r3.3HG0280130
HORVU.MOREX.r3.1HG0040050	HORVU.MOREX.r3.7HG0689360	HORVU.MOREX.r3.6HG0569550	HORVU.MOREX.r3.5HG0427920	HORVU.MOREX.r3.3HG0316540	HORVU.MOREX.r3.2HG0195210	HORVU.MOREX.r3.3HG0280160
HORVU.MOREX.r3.1HG0040100	HORVU.MOREX.r3.7HG0689370	HORVU.MOREX.r3.6HG0569590	HORVU.MOREX.r3.5HG0427990	HORVU.MOREX.r3.3HG0316550	HORVU.MOREX.r3.2HG0195220	HORVU.MOREX.r3.3HG0280180
HORVU.MOREX.r3.1HG0040110	HORVU.MOREX.r3.7HG0689440	HORVU.MOREX.r3.6HG0569600	HORVU.MOREX.r3.5HG0428010	HORVU.MOREX.r3.3HG0316560	HORVU.MOREX.r3.2HG0195230	HORVU.MOREX.r3.3HG0280240
HORVU.MOREX.r3.1HG0040190	HORVU.MOREX.r3.7HG0689490	HORVU.MOREX.r3.6HG0569610	HORVU.MOREX.r3.5HG0428050	HORVU.MOREX.r3.3HG0316580	HORVU.MOREX.r3.2HG0195270	HORVU.MOREX.r3.3HG0280250
HORVU.MOREX.r3.1HG0040220	HORVU.MOREX.r3.7HG0689580	HORVU.MOREX.r3.6HG0569680	HORVU.MOREX.r3.5HG0428060	HORVU.MOREX.r3.3HG0316640	HORVU.MOREX.r3.2HG0195290	HORVU.MOREX.r3.3HG0280270
HORVU.MOREX.r3.1HG0040350	HORVU.MOREX.r3.7HG0689590	HORVU.MOREX.r3.6HG0569700	HORVU.MOREX.r3.5HG0428090	HORVU.MOREX.r3.3HG0316680	HORVU.MOREX.r3.2HG0195300	HORVU.MOREX.r3.3HG0280290
HORVU.MOREX.r3.1HG0040360	HORVU.MOREX.r3.7HG0689620	HORVU.MOREX.r3.6HG0569710	HORVU.MOREX.r3.5HG0428100	HORVU.MOREX.r3.3HG0316750	HORVU.MOREX.r3.2HG0195390	HORVU.MOREX.r3.3HG0280300
HORVU.MOREX.r3.1HG0040370	HORVU.MOREX.r3.7HG0689660	HORVU.MOREX.r3.6HG0569780	HORVU.MOREX.r3.5HG0428110	HORVU.MOREX.r3.3HG0316850	HORVU.MOREX.r3.2HG0195410	HORVU.MOREX.r3.3HG0280310
HORVU.MOREX.r3.1HG0040380	HORVU.MOREX.r3.7HG0689670	HORVU.MOREX.r3.6HG0569810	HORVU.MOREX.r3.5HG0428120	HORVU.MOREX.r3.3HG0316860	HORVU.MOREX.r3.2HG0195440	HORVU.MOREX.r3.3HG0280320
HORVU.MOREX.r3.1HG0040400	HORVU.MOREX.r3.7HG0689680	HORVU.MOREX.r3.6HG0569830	HORVU.MOREX.r3.5HG0428150	HORVU.MOREX.r3.3HG0316870	HORVU.MOREX.r3.2HG0195450	HORVU.MOREX.r3.3HG0280400
HORVU.MOREX.r3.1HG0040550	HORVU.MOREX.r3.7HG0689750	HORVU.MOREX.r3.6HG0569870	HORVU.MOREX.r3.5HG0428180	HORVU.MOREX.r3.3HG0316890	HORVU.MOREX.r3.2HG0195460	HORVU.MOREX.r3.3HG0280430
HORVU.MOREX.r3.1HG0040570	HORVU.MOREX.r3.7HG0689770	HORVU.MOREX.r3.6HG0569880	HORVU.MOREX.r3.5HG0428190	HORVU.MOREX.r3.3HG0316900	HORVU.MOREX.r3.2HG0195470	HORVU.MOREX.r3.3HG0280440
HORVU.MOREX.r3.1HG0040600	HORVU.MOREX.r3.7HG0689870	HORVU.MOREX.r3.6HG0569900	HORVU.MOREX.r3.5HG0428210	HORVU.MOREX.r3.3HG0316940	HORVU.MOREX.r3.2HG0195490	HORVU.MOREX.r3.3HG0280450
HORVU.MOREX.r3.1HG0040610	HORVU.MOREX.r3.7HG0689890	HORVU.MOREX.r3.6HG0569920	HORVU.MOREX.r3.5HG0428230	HORVU.MOREX.r3.3HG0316960	HORVU.MOREX.r3.2HG0195500	HORVU.MOREX.r3.3HG0280470
HORVU.MOREX.r3.1HG0040640	HORVU.MOREX.r3.7HG0689920	HORVU.MOREX.r3.6HG0569930	HORVU.MOREX.r3.5HG0428240	HORVU.MOREX.r3.3HG0317170	HORVU.MOREX.r3.2HG0195510	HORVU.MOREX.r3.3HG0280490
HORVU.MOREX.r3.1HG0040680	HORVU.MOREX.r3.7HG0689940	HORVU.MOREX.r3.6HG0569940	HORVU.MOREX.r3.5HG0428250	HORVU.MOREX.r3.3HG0317180	HORVU.MOREX.r3.2HG0195520	HORVU.MOREX.r3.3HG0280500
HORVU.MOREX.r3.1HG0040690	HORVU.MOREX.r3.7HG0690090	HORVU.MOREX.r3.6HG0569950	HORVU.MOREX.r3.5HG0428260	HORVU.MOREX.r3.3HG0317190	HORVU.MOREX.r3.2HG0195540	HORVU.MOREX.r3.3HG0280510
HORVU.MOREX.r3.1HG0040700	HORVU.MOREX.r3.7HG0690120	HORVU.MOREX.r3.6HG0569970	HORVU.MOREX.r3.5HG0428270	HORVU.MOREX.r3.3HG0317200	HORVU.MOREX.r3.2HG0195550	HORVU.MOREX.r3.3HG0280520
HORVU.MOREX.r3.1HG0040760	HORVU.MOREX.r3.7HG0690240	HORVU.MOREX.r3.6HG0569980	HORVU.MOREX.r3.5HG0428280	HORVU.MOREX.r3.3HG0317230	HORVU.MOREX.r3.2HG0195560	HORVU.MOREX.r3.3HG0280530
HORVU.MOREX.r3.1HG0040770	HORVU.MOREX.r3.7HG0690250	HORVU.MOREX.r3.6HG0569990	HORVU.MOREX.r3.5HG0428290	HORVU.MOREX.r3.3HG0317240	HORVU.MOREX.r3.2HG0195580	HORVU.MOREX.r3.3HG0280610
HORVU.MOREX.r3.1HG0040790	HORVU.MOREX.r3.7HG0690270	HORVU.MOREX.r3.6HG0570000	HORVU.MOREX.r3.5HG0428300	HORVU.MOREX.r3.3HG0317250	HORVU.MOREX.r3.2HG0195600	HORVU.MOREX.r3.3HG0280620
HORVU.MOREX.r3.1HG0040800	HORVU.MOREX.r3.7HG0690370	HORVU.MOREX.r3.6HG0570020	HORVU.MOREX.r3.5HG0428310	HORVU.MOREX.r3.3HG0317270	HORVU.MOREX.r3.2HG0195610	HORVU.MOREX.r3.3HG0280630
HORVU.MOREX.r3.1HG0040810	HORVU.MOREX.r3.7HG0690400	HORVU.MOREX.r3.6HG0570040	HORVU.MOREX.r3.5HG0428320	HORVU.MOREX.r3.3HG0317300	HORVU.MOREX.r3.2HG0195630	HORVU.MOREX.r3.3HG0280670
HORVU.MOREX.r3.1HG0040830	HORVU.MOREX.r3.7HG0690460	HORVU.MOREX.r3.6HG0570130	HORVU.MOREX.r3.5HG0428330	HORVU.MOREX.r3.3HG0317310	HORVU.MOREX.r3.2HG0195640	HORVU.MOREX.r3.3HG0280680
HORVU.MOREX.r3.1HG0040850	HORVU.MOREX.r3.7HG0690540	HORVU.MOREX.r3.6HG0570180	HORVU.MOREX.r3.5HG0428340	HORVU.MOREX.r3.3HG0317500	HORVU.MOREX.r3.2HG0195650	HORVU.MOREX.r3.3HG0280700
HORVU.MOREX.r3.1HG0040860	HORVU.MOREX.r3.7HG0690550	HORVU.MOREX.r3.6HG0570190	HORVU.MOREX.r3.5HG0428350	HORVU.MOREX.r3.3HG0317510	HORVU.MOREX.r3.2HG0195690	HORVU.MOREX.r3.3HG0280710
HORVU.MOREX.r3.1HG0040880	HORVU.MOREX.r3.7HG0690610	HORVU.MOREX.r3.6HG0570200	HORVU.MOREX.r3.5HG0428360	HORVU.MOREX.r3.3HG0317520	HORVU.MOREX.r3.2HG0195710	HORVU.MOREX.r3.3HG0280720
HORVU.MOREX.r3.1HG0040900	HORVU.MOREX.r3.7HG0690650	HORVU.MOREX.r3.6HG0570230	HORVU.MOREX.r3.5HG0428370	HORVU.MOREX.r3.3HG0317610	HORVU.MOREX.r3.2HG0195730	HORVU.MOREX.r3.3HG0280730
HORVU.MOREX.r3.1HG0040950	HORVU.MOREX.r3.7HG0690670	HORVU.MOREX.r3.6HG0570240	HORVU.MOREX.r3.5HG0428440	HORVU.MOREX.r3.3HG0317650	HORVU.MOREX.r3.2HG0195750	HORVU.MOREX.r3.3HG0280740
HORVU.MOREX.r3.1HG0040960	HORVU.MOREX.r3.7HG0690730	HORVU.MOREX.r3.6HG0570250	HORVU.MOREX.r3.5HG0428450	HORVU.MOREX.r3.3HG0317710	HORVU.MOREX.r3.2HG0195790	HORVU.MOREX.r3.3HG0280790
HORVU.MOREX.r3.1HG0040970	HORVU.MOREX.r3.7HG0690780	HORVU.MOREX.r3.6HG0570310	HORVU.MOREX.r3.5HG0428460	HORVU.MOREX.r3.3HG0317730	HORVU.MOREX.r3.2HG0195800	HORVU.MOREX.r3.3HG0280830
HORVU.MOREX.r3.1HG0040990	HORVU.MOREX.r3.7HG0690810	HORVU.MOREX.r3.6HG0570340	HORVU.MOREX.r3.5HG0428530	HORVU.MOREX.r3.3HG0317780	HORVU.MOREX.r3.2HG0195810	HORVU.MOREX.r3.3HG0280840
HORVU.MOREX.r3.1HG0041010	HORVU.MOREX.r3.7HG0690820	HORVU.MOREX.r3.6HG0570350	HORVU.MOREX.r3.5HG0428560	HORVU.MOREX.r3.3HG0317790	HORVU.MOREX.r3.2HG0195850	HORVU.MOREX.r3.3HG0280850
HORVU.MOREX.r3.1HG0041030	HORVU.MOREX.r3.7HG0690890	HORVU.MOREX.r3.6HG0570360	HORVU.MOREX.r3.5HG0428580	HORVU.MOREX.r3.3HG0317800	HORVU.MOREX.r3.2HG0195860	HORVU.MOREX.r3.3HG0280880
HORVU.MOREX.r3.1HG0041060	HORVU.MOREX.r3.7HG0690940	HORVU.MOREX.r3.6HG0570380	HORVU.MOREX.r3.5HG0428600	HORVU.MOREX.r3.3HG0317810	HORVU.MOREX.r3.2HG0195880	HORVU.MOREX.r3.3HG0280890
HORVU.MOREX.r3.1HG0041070	HORVU.MOREX.r3.7HG0690990	HORVU.MOREX.r3.6HG0570430	HORVU.MOREX.r3.5HG0428610	HORVU.MOREX.r3.3HG0317820	HORVU.MOREX.r3.2HG0195900	HORVU.MOREX.r3.3HG0280900
HORVU.MOREX.r3.1HG0041120	HORVU.MOREX.r3.7HG0691000	HORVU.MOREX.r3.6HG0570440	HORVU.MOREX.r3.5HG0428630	HORVU.MOREX.r3.3HG0317830	HORVU.MOREX.r3.2HG0195910	HORVU.MOREX.r3.3HG0280910
HORVU.MOREX.r3.1HG0041130	HORVU.MOREX.r3.7HG0691010	HORVU.MOREX.r3.6HG0570460	HORVU.MOREX.r3.5HG0428640	HORVU.MOREX.r3.3HG0317840	HORVU.MOREX.r3.2HG0195920	HORVU.MOREX.r3.3HG0280920
HORVU.MOREX.r3.1HG0041150	HORVU.MOREX.r3.7HG0691040	HORVU.MOREX.r3.6HG0570470	HORVU.MOREX.r3.5HG0428660	HORVU.MOREX.r3.3HG0317860	HORVU.MOREX.r3.2HG0195930	HORVU.MOREX.r3.3HG0280930
HORVU.MOREX.r3.1HG0041190	HORVU.MOREX.r3.7HG0691060	HORVU.MOREX.r3.6HG0570500	HORVU.MOREX.r3.5HG0428670	HORVU.MOREX.r3.3HG0317870	HORVU.MOREX.r3.2HG0195940	HORVU.MOREX.r3.3HG0280940
HORVU.MOREX.r3.1HG0041200	HORVU.MOREX.r3.7HG0691100	HORVU.MOREX.r3.6HG0570510	HORVU.MOREX.r3.5HG0428680	HORVU.MOREX.r3.3HG0317880	HORVU.MOREX.r3.2HG0195950	HORVU.MOREX.r3.3HG0280960
HORVU.MOREX.r3.1HG0041230	HORVU.MOREX.r3.7HG0691110	HORVU.MOREX.r3.6HG0570520	HORVU.MOREX.r3.5HG0428690	HORVU.MOREX.r3.3HG0317900	HORVU.MOREX.r3.2HG0195960	HORVU.MOREX.r3.3HG0280970
HORVU.MOREX.r3.1HG0041250	HORVU.MOREX.r3.7HG0691120	HORVU.MOREX.r3.6HG0570560	HORVU.MOREX.r3.5HG0428720	HORVU.MOREX.r3.3HG0317910	HORVU.MOREX.r3.2HG0195970	HORVU.MOREX.r3.3HG0280980
HORVU.MOREX.r3.1HG0041260	HORVU.MOREX.r3.7HG0691180	HORVU.MOREX.r3.6HG0570590	HORVU.MOREX.r3.5HG0428750	HORVU.MOREX.r3.3HG0317920	HORVU.MOREX.r3.2HG0195980	HORVU.MOREX.r3.3HG0280990
HORVU.MOREX.r3.1HG0041280	HORVU.MOREX.r3.7HG0691210	HORVU.MOREX.r3.6HG0570600	HORVU.MOREX.r3.5HG0428770	HORVU.MOREX.r3.3HG0318010	HORVU.MOREX.r3.2HG0195990	HORVU.MOREX.r3.3HG0281000
HORVU.MOREX.r3.1HG0041380	HORVU.MOREX.r3.7HG0691390	HORVU.MOREX.r3.6HG0570620	HORVU.MOREX.r3.5HG0428790	HORVU.MOREX.r3.3HG0318080	HORVU.MOREX.r3.2HG0196010	HORVU.MOREX.r3.3HG0281040
HORVU.MOREX.r3.1HG0041410	HORVU.MOREX.r3.7HG0691440	HORVU.MOREX.r3.6HG0570630	HORVU.MOREX.r3.5HG0428820	HORVU.MOREX.r3.3HG0318090	HORVU.MOREX.r3.2HG0196020	HORVU.MOREX.r3.3HG0281070
HORVU.MOREX.r3.1HG0041440	HORVU.MOREX.r3.7HG0691500	HORVU.MOREX.r3.6HG0570640	HORVU.MOREX.r3.5HG0428840	HORVU.MOREX.r3.3HG0318130	HORVU.MOREX.r3.2HG0196050	HORVU.MOREX.r3.3HG0281080
HORVU.MOREX.r3.1HG0041490	HORVU.MOREX.r3.7HG0691520	HORVU.MOREX.r3.6HG0570650	HORVU.MOREX.r3.5HG0428850	HORVU.MOREX.r3.3HG0318170	HORVU.MOREX.r3.2HG0196070	HORVU.MOREX.r3.3HG0281100
HORVU.MOREX.r3.1HG0041500	HORVU.MOREX.r3.7HG0691530	HORVU.MOREX.r3.6HG0570660	HORVU.MOREX.r3.5HG0428880	HORVU.MOREX.r3.3HG0318230	HORVU.MOREX.r3.2HG0196080	HORVU.MOREX.r3.3HG0281110
HORVU.MOREX.r3.1HG0041510	HORVU.MOREX.r3.7HG0691550	HORVU.MOREX.r3.6HG0570670	HORVU.MOREX.r3.5HG0428890	HORVU.MOREX.r3.3HG0318260	HORVU.MOREX.r3.2HG0196090	HORVU.MOREX.r3.3HG0281130
HORVU.MOREX.r3.1HG0041520	HORVU.MOREX.r3.7HG0691600	HORVU.MOREX.r3.6HG0570760	HORVU.MOREX.r3.5HG0428950	HORVU.MOREX.r3.3HG0318270	HORVU.MOREX.r3.2HG0196100	HORVU.MOREX.r3.3HG0281150
HORVU.MOREX.r3.1HG0041550	HORVU.MOREX.r3.7HG0691610	HORVU.MOREX.r3.6HG0570800	HORVU.MOREX.r3.5HG0428960	HORVU.MOREX.r3.3HG0318280	HORVU.MOREX.r3.2HG0196120	HORVU.MOREX.r3.3HG0281180
HORVU.MOREX.r3.1HG0041560	HORVU.MOREX.r3.7HG0691650	HORVU.MOREX.r3.6HG0570820	HORVU.MOREX.r3.5HG0428970	HORVU.MOREX.r3.3HG0318290	HORVU.MOREX.r3.2HG0196130	HORVU.MOREX.r3.3HG0281190
HORVU.MOREX.r3.1HG0041570	HORVU.MOREX.r3.7HG0691700	HORVU.MOREX.r3.6HG0570830	HORVU.MOREX.r3.5HG0428990	HORVU.MOREX.r3.3HG0318330	HORVU.MOREX.r3.2HG0196140	HORVU.MOREX.r3.3HG0281200
HORVU.MOREX.r3.1HG0041580	HORVU.MOREX.r3.7HG0691750	HORVU.MOREX.r3.6HG0570850	HORVU.MOREX.r3.5HG0429000	HORVU.MOREX.r3.3HG0318340	HORVU.MOREX.r3.2HG0196150	HORVU.MOREX.r3.3HG0281210
HORVU.MOREX.r3.1HG0041600	HORVU.MOREX.r3.7HG0691770	HORVU.MOREX.r3.6HG0570860	HORVU.MOREX.r3.5HG0429010	HORVU.MOREX.r3.3HG0318350	HORVU.MOREX.r3.2HG0196160	HORVU.MOREX.r3.3HG0281220
HORVU.MOREX.r3.1HG0041630	HORVU.MOREX.r3.7HG0691800	HORVU.MOREX.r3.6HG0570880	HORVU.MOREX.r3.5HG0429030	HORVU.MOREX.r3.3HG0318370	HORVU.MOREX.r3.2HG0196170	HORVU.MOREX.r3.3HG0281240
HORVU.MOREX.r3.1HG0041660	HORVU.MOREX.r3.7HG0691850	HORVU.MOREX.r3.6HG0570890	HORVU.MOREX.r3.5HG0429040	HORVU.MOREX.r3.3HG0318380	HORVU.MOREX.r3.2HG0196180	HORVU.MOREX.r3.3HG0281250
HORVU.MOREX.r3.1HG0041670	HORVU.MOREX.r3.7HG0691910	HORVU.MOREX.r3.6HG0570900	HORVU.MOREX.r3.5HG0429050	HORVU.MOREX.r3.3HG0318390	HORVU.MOREX.r3.2HG0196190	HORVU.MOREX.r3.3HG0281260
HORVU.MOREX.r3.1HG0041680	HORVU.MOREX.r3.7HG0691920	HORVU.MOREX.r3.6HG0570910	HORVU.MOREX.r3.5HG0429100	HORVU.MOREX.r3.3HG0318400	HORVU.MOREX.r3.2HG0196250	HORVU.MOREX.r3.3HG0281270
HORVU.MOREX.r3.1HG0041700	HORVU.MOREX.r3.7HG0691930	HORVU.MOREX.r3.6HG0570920	HORVU.MOREX.r3.5HG0429130	HORVU.MOREX.r3.3HG0318420	HORVU.MOREX.r3.2HG0196270	HORVU.MOREX.r3.3HG0281280
HORVU.MOREX.r3.1HG0041710	HORVU.MOREX.r3.7HG0691940	HORVU.MOREX.r3.6HG0570940	HORVU.MOREX.r3.5HG0429140	HORVU.MOREX.r3.3HG0318450	HORVU.MOREX.r3.2HG0196290	HORVU.MOREX.r3.3HG0281290
HORVU.MOREX.r3.1HG0041720	HORVU.MOREX.r3.7HG0691980	HORVU.MOREX.r3.6HG0570950	HORVU.MOREX.r3.5HG0429150	HORVU.MOREX.r3.3HG0318470	HORVU.MOREX.r3.2HG0196300	HORVU.MOREX.r3.3HG0281310
HORVU.MOREX.r3.1HG0041780	HORVU.MOREX.r3.7HG0691990	HORVU.MOREX.r3.6HG0570960	HORVU.MOREX.r3.5HG0429170	HORVU.MOREX.r3.3HG0318510	HORVU.MOREX.r3.2HG0196310	HORVU.MOREX.r3.3HG0281320
HORVU.MOREX.r3.1HG0041820	HORVU.MOREX.r3.7HG0692050	HORVU.MOREX.r3.6HG0570970	HORVU.MOREX.r3.5HG0429180	HORVU.MOREX.r3.3HG0318550	HORVU.MOREX.r3.2HG0196320	HORVU.MOREX.r3.3HG0281330
HORVU.MOREX.r3.1HG0041830	HORVU.MOREX.r3.7HG0692070	HORVU.MOREX.r3.6HG0570980	HORVU.MOREX.r3.5HG0429190	HORVU.MOREX.r3.3HG0318560	HORVU.MOREX.r3.2HG0196330	HORVU.MOREX.r3.3HG0281340
HORVU.MOREX.r3.1HG0041960	HORVU.MOREX.r3.7HG0692090	HORVU.MOREX.r3.6HG0570990	HORVU.MOREX.r3.5HG0429210	HORVU.MOREX.r3.3HG0318580	HORVU.MOREX.r3.2HG0196340	HORVU.MOREX.r3.3HG0281350
HORVU.MOREX.r3.1HG0041970	HORVU.MOREX.r3.7HG0692100	HORVU.MOREX.r3.6HG0571000	HORVU.MOREX.r3.5HG0429230	HORVU.MOREX.r3.3HG0318590	HORVU.MOREX.r3.2HG0196360	HORVU.MOREX.r3.3HG0281390
HORVU.MOREX.r3.1HG0041980	HORVU.MOREX.r3.7HG0692170	HORVU.MOREX.r3.6HG0571070	HORVU.MOREX.r3.5HG0429260	HORVU.MOREX.r3.3HG0318600	HORVU.MOREX.r3.2HG0196370	HORVU.MOREX.r3.3HG0281400
HORVU.MOREX.r3.1HG0042040	HORVU.MOREX.r3.7HG0692370	HORVU.MOREX.r3.6HG0571180	HORVU.MOREX.r3.5HG0429280	HORVU.MOREX.r3.3HG0318610	HORVU.MOREX.r3.2HG0196380	HORVU.MOREX.r3.3HG0281430
HORVU.MOREX.r3.1HG0042060	HORVU.MOREX.r3.7HG0692380	HORVU.MOREX.r3.6HG0571190	HORVU.MOREX.r3.5HG0429300	HORVU.MOREX.r3.3HG0318620	HORVU.MOREX.r3.2HG0196390	HORVU.MOREX.r3.3HG0281440
HORVU.MOREX.r3.1HG0042080	HORVU.MOREX.r3.7HG0692390	HORVU.MOREX.r3.6HG0571210	HORVU.MOREX.r3.5HG0429320	HORVU.MOREX.r3.3HG0318640	HORVU.MOREX.r3.2HG0196410	HORVU.MOREX.r3.3HG0281480
HORVU.MOREX.r3.1HG0042090	HORVU.MOREX.r3.7HG0692490	HORVU.MOREX.r3.6HG0571240	HORVU.MOREX.r3.5HG0429340	HORVU.MOREX.r3.3HG0318650	HORVU.MOREX.r3.2HG0196420	HORVU.MOREX.r3.3HG0281500
HORVU.MOREX.r3.1HG0042100	HORVU.MOREX.r3.7HG0692500	HORVU.MOREX.r3.6HG0571260	HORVU.MOREX.r3.5HG0429360	HORVU.MOREX.r3.3HG0318660	HORVU.MOREX.r3.2HG0196450	HORVU.MOREX.r3.3HG0281510
HORVU.MOREX.r3.1HG0042110	HORVU.MOREX.r3.7HG0692610	HORVU.MOREX.r3.6HG0571270	HORVU.MOREX.r3.5HG0429370	HORVU.MOREX.r3.3HG0318670	HORVU.MOREX.r3.2HG0196460	HORVU.MOREX.r3.3HG0281520
HORVU.MOREX.r3.1HG0042120	HORVU.MOREX.r3.7HG0692640	HORVU.MOREX.r3.6HG0571280	HORVU.MOREX.r3.5HG0429380	HORVU.MOREX.r3.3HG0318700	HORVU.MOREX.r3.2HG0196470	HORVU.MOREX.r3.3HG0281530
HORVU.MOREX.r3.1HG0042190	HORVU.MOREX.r3.7HG0692650	HORVU.MOREX.r3.6HG0571290	HORVU.MOREX.r3.5HG0429390	HORVU.MOREX.r3.3HG0318720	HORVU.MOREX.r3.2HG0196480	HORVU.MOREX.r3.3HG0281540
HORVU.MOREX.r3.1HG0042200	HORVU.MOREX.r3.7HG0692740	HORVU.MOREX.r3.6HG0571300	HORVU.MOREX.r3.5HG0429400	HORVU.MOREX.r3.3HG0318760	HORVU.MOREX.r3.2HG0196510	HORVU.MOREX.r3.3HG0281590
HORVU.MOREX.r3.1HG0042220	HORVU.MOREX.r3.7HG0692990	HORVU.MOREX.r3.6HG0571330	HORVU.MOREX.r3.5HG0429420	HORVU.MOREX.r3.3HG0318790	HORVU.MOREX.r3.2HG0196520	HORVU.MOREX.r3.3HG0281610
HORVU.MOREX.r3.1HG0042230	HORVU.MOREX.r3.7HG0693010	HORVU.MOREX.r3.6HG0571370	HORVU.MOREX.r3.5HG0429430	HORVU.MOREX.r3.3HG0318810	HORVU.MOREX.r3.2HG0196530	HORVU.MOREX.r3.3HG0281620
HORVU.MOREX.r3.1HG0042290	HORVU.MOREX.r3.7HG0693030	HORVU.MOREX.r3.6HG0571380	HORVU.MOREX.r3.5HG0429510	HORVU.MOREX.r3.3HG0318820	HORVU.MOREX.r3.2HG0196540	HORVU.MOREX.r3.3HG0281690
HORVU.MOREX.r3.1HG0042320	HORVU.MOREX.r3.7HG0693060	HORVU.MOREX.r3.6HG0571420	HORVU.MOREX.r3.5HG0429520	HORVU.MOREX.r3.3HG0318840	HORVU.MOREX.r3.2HG0196550	HORVU.MOREX.r3.3HG0281700
HORVU.MOREX.r3.1HG0042370	HORVU.MOREX.r3.7HG0693070	HORVU.MOREX.r3.6HG0571450	HORVU.MOREX.r3.5HG0429530	HORVU.MOREX.r3.3HG0318870	HORVU.MOREX.r3.2HG0196570	HORVU.MOREX.r3.3HG0281730
HORVU.MOREX.r3.1HG0042380	HORVU.MOREX.r3.7HG0693080	HORVU.MOREX.r3.6HG0571460	HORVU.MOREX.r3.5HG0429550	HORVU.MOREX.r3.3HG0318880	HORVU.MOREX.r3.2HG0196590	HORVU.MOREX.r3.3HG0281770
HORVU.MOREX.r3.1HG0042400	HORVU.MOREX.r3.7HG0693110	HORVU.MOREX.r3.6HG0571470	HORVU.MOREX.r3.5HG0429580	HORVU.MOREX.r3.3HG0318890	HORVU.MOREX.r3.2HG0196600	HORVU.MOREX.r3.3HG0281780
HORVU.MOREX.r3.1HG0042420	HORVU.MOREX.r3.7HG0693240	HORVU.MOREX.r3.6HG0571480	HORVU.MOREX.r3.5HG0429590	HORVU.MOREX.r3.3HG0318900	HORVU.MOREX.r3.2HG0196610	HORVU.MOREX.r3.3HG0281790
HORVU.MOREX.r3.1HG0042440	HORVU.MOREX.r3.7HG0693250	HORVU.MOREX.r3.6HG0571560	HORVU.MOREX.r3.5HG0429600	HORVU.MOREX.r3.3HG0318930	HORVU.MOREX.r3.2HG0196620	HORVU.MOREX.r3.3HG0281810
HORVU.MOREX.r3.1HG0042470	HORVU.MOREX.r3.7HG0693260	HORVU.MOREX.r3.6HG0571590	HORVU.MOREX.r3.5HG0429610	HORVU.MOREX.r3.3HG0318940	HORVU.MOREX.r3.2HG0196630	HORVU.MOREX.r3.3HG0281820
HORVU.MOREX.r3.1HG0042510	HORVU.MOREX.r3.7HG0693280	HORVU.MOREX.r3.6HG0571610	HORVU.MOREX.r3.5HG0429620	HORVU.MOREX.r3.3HG0318990	HORVU.MOREX.r3.2HG0196640	HORVU.MOREX.r3.3HG0281850
HORVU.MOREX.r3.1HG0042530	HORVU.MOREX.r3.7HG0693310	HORVU.MOREX.r3.6HG0571620	HORVU.MOREX.r3.5HG0429630	HORVU.MOREX.r3.3HG0319010	HORVU.MOREX.r3.2HG0196650	HORVU.MOREX.r3.3HG0281860
HORVU.MOREX.r3.1HG0042590	HORVU.MOREX.r3.7HG0693320	HORVU.MOREX.r3.6HG0571630	HORVU.MOREX.r3.5HG0429660	HORVU.MOREX.r3.3HG0319020	HORVU.MOREX.r3.2HG0196660	HORVU.MOREX.r3.3HG0281980
HORVU.MOREX.r3.1HG0042600	HORVU.MOREX.r3.7HG0693340	HORVU.MOREX.r3.6HG0571650	HORVU.MOREX.r3.5HG0429680	HORVU.MOREX.r3.3HG0319060	HORVU.MOREX.r3.2HG0196670	HORVU.MOREX.r3.3HG0282000
HORVU.MOREX.r3.1HG0042620	HORVU.MOREX.r3.7HG0693350	HORVU.MOREX.r3.6HG0571680	HORVU.MOREX.r3.5HG0429700	HORVU.MOREX.r3.3HG0319100	HORVU.MOREX.r3.2HG0196700	HORVU.MOREX.r3.3HG0282010
HORVU.MOREX.r3.1HG0042720	HORVU.MOREX.r3.7HG0693390	HORVU.MOREX.r3.6HG0571700	HORVU.MOREX.r3.5HG0429720	HORVU.MOREX.r3.3HG0319110	HORVU.MOREX.r3.2HG0196710	HORVU.MOREX.r3.3HG0282020
HORVU.MOREX.r3.1HG0042740	HORVU.MOREX.r3.7HG0693420	HORVU.MOREX.r3.6HG0571710	HORVU.MOREX.r3.5HG0429750	HORVU.MOREX.r3.3HG0319130	HORVU.MOREX.r3.2HG0196720	HORVU.MOREX.r3.3HG0282120
HORVU.MOREX.r3.1HG0042750	HORVU.MOREX.r3.7HG0693430	HORVU.MOREX.r3.6HG0571720	HORVU.MOREX.r3.5HG0429770	HORVU.MOREX.r3.3HG0319140	HORVU.MOREX.r3.2HG0196740	HORVU.MOREX.r3.3HG0282130
HORVU.MOREX.r3.1HG0042770	HORVU.MOREX.r3.7HG0693440	HORVU.MOREX.r3.6HG0571740	HORVU.MOREX.r3.5HG0429780	HORVU.MOREX.r3.3HG0319180	HORVU.MOREX.r3.2HG0196750	HORVU.MOREX.r3.3HG0282140
HORVU.MOREX.r3.1HG0042860	HORVU.MOREX.r3.7HG0693490	HORVU.MOREX.r3.6HG0571750	HORVU.MOREX.r3.5HG0429810	HORVU.MOREX.r3.3HG0319190	HORVU.MOREX.r3.2HG0196760	HORVU.MOREX.r3.3HG0282150
HORVU.MOREX.r3.1HG0042870	HORVU.MOREX.r3.7HG0693570	HORVU.MOREX.r3.6HG0571760	HORVU.MOREX.r3.5HG0429820	HORVU.MOREX.r3.3HG0319200	HORVU.MOREX.r3.2HG0196780	HORVU.MOREX.r3.3HG0282160
HORVU.MOREX.r3.1HG0042920	HORVU.MOREX.r3.7HG0693590	HORVU.MOREX.r3.6HG0571770	HORVU.MOREX.r3.5HG0429830	HORVU.MOREX.r3.3HG0319210	HORVU.MOREX.r3.2HG0196800	HORVU.MOREX.r3.3HG0282170
HORVU.MOREX.r3.1HG0042940	HORVU.MOREX.r3.7HG0693700	HORVU.MOREX.r3.6HG0571780	HORVU.MOREX.r3.5HG0429840	HORVU.MOREX.r3.3HG0319220	HORVU.MOREX.r3.2HG0196810	HORVU.MOREX.r3.3HG0282210
HORVU.MOREX.r3.1HG0042970	HORVU.MOREX.r3.7HG0693770	HORVU.MOREX.r3.6HG0571790	HORVU.MOREX.r3.5HG0429860	HORVU.MOREX.r3.3HG0319240	HORVU.MOREX.r3.2HG0196820	HORVU.MOREX.r3.3HG0282230
HORVU.MOREX.r3.1HG0042990	HORVU.MOREX.r3.7HG0693880	HORVU.MOREX.r3.6HG0571800	HORVU.MOREX.r3.5HG0429870	HORVU.MOREX.r3.3HG0319250	HORVU.MOREX.r3.2HG0196830	HORVU.MOREX.r3.3HG0282250
HORVU.MOREX.r3.1HG0043000	HORVU.MOREX.r3.7HG0693910	HORVU.MOREX.r3.6HG0571810	HORVU.MOREX.r3.5HG0429890	HORVU.MOREX.r3.3HG0319270	HORVU.MOREX.r3.2HG0196840	HORVU.MOREX.r3.3HG0282360
HORVU.MOREX.r3.1HG0043030	HORVU.MOREX.r3.7HG0693960	HORVU.MOREX.r3.6HG0571820	HORVU.MOREX.r3.5HG0429900	HORVU.MOREX.r3.3HG0319280	HORVU.MOREX.r3.2HG0196850	HORVU.MOREX.r3.3HG0282370
HORVU.MOREX.r3.1HG0043060	HORVU.MOREX.r3.7HG0694060	HORVU.MOREX.r3.6HG0571870	HORVU.MOREX.r3.5HG0429930	HORVU.MOREX.r3.3HG0319300	HORVU.MOREX.r3.2HG0196890	HORVU.MOREX.r3.3HG0282430
HORVU.MOREX.r3.1HG0043100	HORVU.MOREX.r3.7HG0694080	HORVU.MOREX.r3.6HG0571900	HORVU.MOREX.r3.5HG0429940	HORVU.MOREX.r3.3HG0319310	HORVU.MOREX.r3.2HG0196910	HORVU.MOREX.r3.3HG0282440
HORVU.MOREX.r3.1HG0043170	HORVU.MOREX.r3.7HG0694090	HORVU.MOREX.r3.6HG0571920	HORVU.MOREX.r3.5HG0429960	HORVU.MOREX.r3.3HG0319320	HORVU.MOREX.r3.2HG0196920	HORVU.MOREX.r3.3HG0282500
HORVU.MOREX.r3.1HG0043190	HORVU.MOREX.r3.7HG0694130	HORVU.MOREX.r3.6HG0571930	HORVU.MOREX.r3.5HG0429970	HORVU.MOREX.r3.3HG0319330	HORVU.MOREX.r3.2HG0196930	HORVU.MOREX.r3.3HG0282510
HORVU.MOREX.r3.1HG0043210	HORVU.MOREX.r3.7HG0694190	HORVU.MOREX.r3.6HG0571950	HORVU.MOREX.r3.5HG0429980	HORVU.MOREX.r3.3HG0319340	HORVU.MOREX.r3.2HG0196940	HORVU.MOREX.r3.3HG0282530
HORVU.MOREX.r3.1HG0043220	HORVU.MOREX.r3.7HG0694250	HORVU.MOREX.r3.6HG0571970	HORVU.MOREX.r3.5HG0430000	HORVU.MOREX.r3.3HG0319350	HORVU.MOREX.r3.2HG0196950	HORVU.MOREX.r3.3HG0282580
HORVU.MOREX.r3.1HG0043270	HORVU.MOREX.r3.7HG0694260	HORVU.MOREX.r3.6HG0572030	HORVU.MOREX.r3.5HG0430020	HORVU.MOREX.r3.3HG0319360	HORVU.MOREX.r3.2HG0196960	HORVU.MOREX.r3.3HG0282600
HORVU.MOREX.r3.1HG0043310	HORVU.MOREX.r3.7HG0694310	HORVU.MOREX.r3.6HG0572060	HORVU.MOREX.r3.5HG0430030	HORVU.MOREX.r3.3HG0319370	HORVU.MOREX.r3.2HG0196990	HORVU.MOREX.r3.3HG0282630
HORVU.MOREX.r3.1HG0043320	HORVU.MOREX.r3.7HG0694350	HORVU.MOREX.r3.6HG0572070	HORVU.MOREX.r3.5HG0430050	HORVU.MOREX.r3.3HG0319380	HORVU.MOREX.r3.2HG0197000	HORVU.MOREX.r3.3HG0282640
HORVU.MOREX.r3.1HG0043330	HORVU.MOREX.r3.7HG0694470	HORVU.MOREX.r3.6HG0572090	HORVU.MOREX.r3.5HG0430130	HORVU.MOREX.r3.3HG0319390	HORVU.MOREX.r3.2HG0197010	HORVU.MOREX.r3.3HG0282680
HORVU.MOREX.r3.1HG0043350	HORVU.MOREX.r3.7HG0694490	HORVU.MOREX.r3.6HG0572110	HORVU.MOREX.r3.5HG0430140	HORVU.MOREX.r3.3HG0319400	HORVU.MOREX.r3.2HG0197020	HORVU.MOREX.r3.3HG0282690
HORVU.MOREX.r3.1HG0043410	HORVU.MOREX.r3.7HG0694520	HORVU.MOREX.r3.6HG0572120	HORVU.MOREX.r3.5HG0430170	HORVU.MOREX.r3.3HG0319410	HORVU.MOREX.r3.2HG0197030	HORVU.MOREX.r3.3HG0282700
HORVU.MOREX.r3.1HG0043450	HORVU.MOREX.r3.7HG0694660	HORVU.MOREX.r3.6HG0572130	HORVU.MOREX.r3.5HG0430180	HORVU.MOREX.r3.3HG0319450	HORVU.MOREX.r3.2HG0197040	HORVU.MOREX.r3.3HG0282710
HORVU.MOREX.r3.1HG0043520	HORVU.MOREX.r3.7HG0694690	HORVU.MOREX.r3.6HG0572160	HORVU.MOREX.r3.5HG0430200	HORVU.MOREX.r3.3HG0319460	HORVU.MOREX.r3.2HG0197050	HORVU.MOREX.r3.3HG0282720
HORVU.MOREX.r3.1HG0043530	HORVU.MOREX.r3.7HG0694750	HORVU.MOREX.r3.6HG0572180	HORVU.MOREX.r3.5HG0430210	HORVU.MOREX.r3.3HG0319500	HORVU.MOREX.r3.2HG0197060	HORVU.MOREX.r3.3HG0282740
HORVU.MOREX.r3.1HG0043570	HORVU.MOREX.r3.7HG0694780	HORVU.MOREX.r3.6HG0572230	HORVU.MOREX.r3.5HG0430240	HORVU.MOREX.r3.3HG0319510	HORVU.MOREX.r3.2HG0197080	HORVU.MOREX.r3.3HG0282760
HORVU.MOREX.r3.1HG0043590	HORVU.MOREX.r3.7HG0694820	HORVU.MOREX.r3.6HG0572250	HORVU.MOREX.r3.5HG0430270	HORVU.MOREX.r3.3HG0319520	HORVU.MOREX.r3.2HG0197110	HORVU.MOREX.r3.3HG0282770
HORVU.MOREX.r3.1HG0043600	HORVU.MOREX.r3.7HG0694880	HORVU.MOREX.r3.6HG0572270	HORVU.MOREX.r3.5HG0430290	HORVU.MOREX.r3.3HG0319530	HORVU.MOREX.r3.2HG0197130	HORVU.MOREX.r3.3HG0282780
HORVU.MOREX.r3.1HG0043620	HORVU.MOREX.r3.7HG0694910	HORVU.MOREX.r3.6HG0572280	HORVU.MOREX.r3.5HG0430300	HORVU.MOREX.r3.3HG0319540	HORVU.MOREX.r3.2HG0197140	HORVU.MOREX.r3.3HG0282790
HORVU.MOREX.r3.1HG0043640	HORVU.MOREX.r3.7HG0694980	HORVU.MOREX.r3.6HG0572290	HORVU.MOREX.r3.5HG0430370	HORVU.MOREX.r3.3HG0319570	HORVU.MOREX.r3.2HG0197160	HORVU.MOREX.r3.3HG0282800
HORVU.MOREX.r3.1HG0043650	HORVU.MOREX.r3.7HG0694990	HORVU.MOREX.r3.6HG0572300	HORVU.MOREX.r3.5HG0430380	HORVU.MOREX.r3.3HG0319620	HORVU.MOREX.r3.2HG0197180	HORVU.MOREX.r3.3HG0282810
HORVU.MOREX.r3.1HG0043670	HORVU.MOREX.r3.7HG0695000	HORVU.MOREX.r3.6HG0572310	HORVU.MOREX.r3.5HG0430390	HORVU.MOREX.r3.3HG0319670	HORVU.MOREX.r3.2HG0197190	HORVU.MOREX.r3.3HG0282820
HORVU.MOREX.r3.1HG0043710	HORVU.MOREX.r3.7HG0695010	HORVU.MOREX.r3.6HG0572330	HORVU.MOREX.r3.5HG0430410	HORVU.MOREX.r3.3HG0319680	HORVU.MOREX.r3.2HG0197200	HORVU.MOREX.r3.3HG0282860
HORVU.MOREX.r3.1HG0043750	HORVU.MOREX.r3.7HG0695050	HORVU.MOREX.r3.6HG0572380	HORVU.MOREX.r3.5HG0430450	HORVU.MOREX.r3.3HG0319710	HORVU.MOREX.r3.2HG0197210	HORVU.MOREX.r3.3HG0282880
HORVU.MOREX.r3.1HG0043790	HORVU.MOREX.r3.7HG0695170	HORVU.MOREX.r3.6HG0572400	HORVU.MOREX.r3.5HG0430460	HORVU.MOREX.r3.3HG0319760	HORVU.MOREX.r3.2HG0197230	HORVU.MOREX.r3.3HG0282890
HORVU.MOREX.r3.1HG0043800	HORVU.MOREX.r3.7HG0695240	HORVU.MOREX.r3.6HG0572410	HORVU.MOREX.r3.5HG0430480	HORVU.MOREX.r3.3HG0319770	HORVU.MOREX.r3.2HG0197270	HORVU.MOREX.r3.3HG0282900
HORVU.MOREX.r3.1HG0043850	HORVU.MOREX.r3.7HG0695270	HORVU.MOREX.r3.6HG0572440	HORVU.MOREX.r3.5HG0430490	HORVU.MOREX.r3.3HG0319780	HORVU.MOREX.r3.2HG0197280	HORVU.MOREX.r3.3HG0282920
HORVU.MOREX.r3.1HG0043860	HORVU.MOREX.r3.7HG0695340	HORVU.MOREX.r3.6HG0572560	HORVU.MOREX.r3.5HG0430500	HORVU.MOREX.r3.3HG0319800	HORVU.MOREX.r3.2HG0197290	HORVU.MOREX.r3.3HG0282930
HORVU.MOREX.r3.1HG0043960	HORVU.MOREX.r3.7HG0695390	HORVU.MOREX.r3.6HG0572570	HORVU.MOREX.r3.5HG0430510	HORVU.MOREX.r3.3HG0319810	HORVU.MOREX.r3.2HG0197300	HORVU.MOREX.r3.3HG0282960
HORVU.MOREX.r3.1HG0043980	HORVU.MOREX.r3.7HG0695440	HORVU.MOREX.r3.6HG0572580	HORVU.MOREX.r3.5HG0430520	HORVU.MOREX.r3.3HG0319820	HORVU.MOREX.r3.2HG0197310	HORVU.MOREX.r3.3HG0282980
HORVU.MOREX.r3.1HG0043990	HORVU.MOREX.r3.7HG0695480	HORVU.MOREX.r3.6HG0572590	HORVU.MOREX.r3.5HG0430530	HORVU.MOREX.r3.3HG0319830	HORVU.MOREX.r3.2HG0197320	HORVU.MOREX.r3.3HG0283050
HORVU.MOREX.r3.1HG0044000	HORVU.MOREX.r3.7HG0695490	HORVU.MOREX.r3.6HG0572600	HORVU.MOREX.r3.5HG0430540	HORVU.MOREX.r3.3HG0319850	HORVU.MOREX.r3.2HG0197330	HORVU.MOREX.r3.3HG0283080
HORVU.MOREX.r3.1HG0044010	HORVU.MOREX.r3.7HG0695500	HORVU.MOREX.r3.6HG0572660	HORVU.MOREX.r3.5HG0430550	HORVU.MOREX.r3.3HG0319890	HORVU.MOREX.r3.2HG0197340	HORVU.MOREX.r3.3HG0283090
HORVU.MOREX.r3.1HG0044070	HORVU.MOREX.r3.7HG0695630	HORVU.MOREX.r3.6HG0572670	HORVU.MOREX.r3.5HG0430560	HORVU.MOREX.r3.3HG0319900	HORVU.MOREX.r3.2HG0197370	HORVU.MOREX.r3.3HG0283100
HORVU.MOREX.r3.1HG0044080	HORVU.MOREX.r3.7HG0695720	HORVU.MOREX.r3.6HG0572740	HORVU.MOREX.r3.5HG0430620	HORVU.MOREX.r3.3HG0319920	HORVU.MOREX.r3.2HG0197380	HORVU.MOREX.r3.3HG0283120
HORVU.MOREX.r3.1HG0044090	HORVU.MOREX.r3.7HG0695740	HORVU.MOREX.r3.6HG0572780	HORVU.MOREX.r3.5HG0430650	HORVU.MOREX.r3.3HG0319930	HORVU.MOREX.r3.2HG0197390	HORVU.MOREX.r3.3HG0283130
HORVU.MOREX.r3.1HG0044100	HORVU.MOREX.r3.7HG0695830	HORVU.MOREX.r3.6HG0572820	HORVU.MOREX.r3.5HG0430660	HORVU.MOREX.r3.3HG0319940	HORVU.MOREX.r3.2HG0197410	HORVU.MOREX.r3.3HG0283140
HORVU.MOREX.r3.1HG0044110	HORVU.MOREX.r3.7HG0695840	HORVU.MOREX.r3.6HG0572830	HORVU.MOREX.r3.5HG0430700	HORVU.MOREX.r3.3HG0319950	HORVU.MOREX.r3.2HG0197430	HORVU.MOREX.r3.3HG0283150
HORVU.MOREX.r3.1HG0044150	HORVU.MOREX.r3.7HG0695850	HORVU.MOREX.r3.6HG0572850	HORVU.MOREX.r3.5HG0430710	HORVU.MOREX.r3.3HG0319960	HORVU.MOREX.r3.2HG0197440	HORVU.MOREX.r3.3HG0283190
HORVU.MOREX.r3.1HG0044200	HORVU.MOREX.r3.7HG0695920	HORVU.MOREX.r3.6HG0572860	HORVU.MOREX.r3.5HG0430720	HORVU.MOREX.r3.3HG0319990	HORVU.MOREX.r3.2HG0197450	HORVU.MOREX.r3.3HG0283210
HORVU.MOREX.r3.1HG0044280	HORVU.MOREX.r3.7HG0695980	HORVU.MOREX.r3.6HG0572870	HORVU.MOREX.r3.5HG0430730	HORVU.MOREX.r3.3HG0320000	HORVU.MOREX.r3.2HG0197510	HORVU.MOREX.r3.3HG0283230
HORVU.MOREX.r3.1HG0044290	HORVU.MOREX.r3.7HG0696030	HORVU.MOREX.r3.6HG0572880	HORVU.MOREX.r3.5HG0430740	HORVU.MOREX.r3.3HG0320030	HORVU.MOREX.r3.2HG0197540	HORVU.MOREX.r3.3HG0283240
HORVU.MOREX.r3.1HG0044310	HORVU.MOREX.r3.7HG0696090	HORVU.MOREX.r3.6HG0572900	HORVU.MOREX.r3.5HG0430760	HORVU.MOREX.r3.3HG0320040	HORVU.MOREX.r3.2HG0197550	HORVU.MOREX.r3.3HG0283250
HORVU.MOREX.r3.1HG0044360	HORVU.MOREX.r3.7HG0696100	HORVU.MOREX.r3.6HG0572910	HORVU.MOREX.r3.5HG0430800	HORVU.MOREX.r3.3HG0320050	HORVU.MOREX.r3.2HG0197560	HORVU.MOREX.r3.3HG0283280
HORVU.MOREX.r3.1HG0044370	HORVU.MOREX.r3.7HG0696140	HORVU.MOREX.r3.6HG0572920	HORVU.MOREX.r3.5HG0430810	HORVU.MOREX.r3.3HG0320100	HORVU.MOREX.r3.2HG0197610	HORVU.MOREX.r3.3HG0283290
HORVU.MOREX.r3.1HG0044380	HORVU.MOREX.r3.7HG0696150	HORVU.MOREX.r3.6HG0572930	HORVU.MOREX.r3.5HG0430840	HORVU.MOREX.r3.3HG0320130	HORVU.MOREX.r3.2HG0197620	HORVU.MOREX.r3.3HG0283300
HORVU.MOREX.r3.1HG0044390	HORVU.MOREX.r3.7HG0696190	HORVU.MOREX.r3.6HG0572950	HORVU.MOREX.r3.5HG0430860	HORVU.MOREX.r3.3HG0320140	HORVU.MOREX.r3.2HG0197630	HORVU.MOREX.r3.3HG0283320
HORVU.MOREX.r3.1HG0044400	HORVU.MOREX.r3.7HG0696220	HORVU.MOREX.r3.6HG0572980	HORVU.MOREX.r3.5HG0430870	HORVU.MOREX.r3.3HG0320150	HORVU.MOREX.r3.2HG0197670	HORVU.MOREX.r3.3HG0283340
HORVU.MOREX.r3.1HG0044430	HORVU.MOREX.r3.7HG0696340	HORVU.MOREX.r3.6HG0572990	HORVU.MOREX.r3.5HG0430880	HORVU.MOREX.r3.3HG0320160	HORVU.MOREX.r3.2HG0197680	HORVU.MOREX.r3.3HG0283350
HORVU.MOREX.r3.1HG0044440	HORVU.MOREX.r3.7HG0696450	HORVU.MOREX.r3.6HG0573010	HORVU.MOREX.r3.5HG0430890	HORVU.MOREX.r3.3HG0320170	HORVU.MOREX.r3.2HG0197690	HORVU.MOREX.r3.3HG0283370
HORVU.MOREX.r3.1HG0044470	HORVU.MOREX.r3.7HG0696470	HORVU.MOREX.r3.6HG0573040	HORVU.MOREX.r3.5HG0430900	HORVU.MOREX.r3.3HG0320180	HORVU.MOREX.r3.2HG0197700	HORVU.MOREX.r3.3HG0283420
HORVU.MOREX.r3.1HG0044490	HORVU.MOREX.r3.7HG0696510	HORVU.MOREX.r3.6HG0573060	HORVU.MOREX.r3.5HG0430930	HORVU.MOREX.r3.3HG0320200	HORVU.MOREX.r3.2HG0197710	HORVU.MOREX.r3.3HG0283480
HORVU.MOREX.r3.1HG0044500	HORVU.MOREX.r3.7HG0696530	HORVU.MOREX.r3.6HG0573070	HORVU.MOREX.r3.5HG0430940	HORVU.MOREX.r3.3HG0320210	HORVU.MOREX.r3.2HG0197720	HORVU.MOREX.r3.3HG0283500
HORVU.MOREX.r3.1HG0044530	HORVU.MOREX.r3.7HG0696550	HORVU.MOREX.r3.6HG0573080	HORVU.MOREX.r3.5HG0430980	HORVU.MOREX.r3.3HG0320220	HORVU.MOREX.r3.2HG0197730	HORVU.MOREX.r3.3HG0283520
HORVU.MOREX.r3.1HG0044550	HORVU.MOREX.r3.7HG0696560	HORVU.MOREX.r3.6HG0573090	HORVU.MOREX.r3.5HG0431020	HORVU.MOREX.r3.3HG0320230	HORVU.MOREX.r3.2HG0197750	HORVU.MOREX.r3.3HG0283530
HORVU.MOREX.r3.1HG0044570	HORVU.MOREX.r3.7HG0696580	HORVU.MOREX.r3.6HG0573110	HORVU.MOREX.r3.5HG0431030	HORVU.MOREX.r3.3HG0320240	HORVU.MOREX.r3.2HG0197760	HORVU.MOREX.r3.3HG0283540
HORVU.MOREX.r3.1HG0044610	HORVU.MOREX.r3.7HG0696660	HORVU.MOREX.r3.6HG0573120	HORVU.MOREX.r3.5HG0431040	HORVU.MOREX.r3.3HG0320250	HORVU.MOREX.r3.2HG0197780	HORVU.MOREX.r3.3HG0283550
HORVU.MOREX.r3.1HG0044630	HORVU.MOREX.r3.7HG0696680	HORVU.MOREX.r3.6HG0573150	HORVU.MOREX.r3.5HG0431050	HORVU.MOREX.r3.3HG0320270	HORVU.MOREX.r3.2HG0197800	HORVU.MOREX.r3.3HG0283580
HORVU.MOREX.r3.1HG0044640	HORVU.MOREX.r3.7HG0696720	HORVU.MOREX.r3.6HG0573180	HORVU.MOREX.r3.5HG0431140	HORVU.MOREX.r3.3HG0320280	HORVU.MOREX.r3.2HG0197820	HORVU.MOREX.r3.3HG0283600
HORVU.MOREX.r3.1HG0044660	HORVU.MOREX.r3.7HG0696770	HORVU.MOREX.r3.6HG0573200	HORVU.MOREX.r3.5HG0431150	HORVU.MOREX.r3.3HG0320290	HORVU.MOREX.r3.2HG0197830	HORVU.MOREX.r3.3HG0283610
HORVU.MOREX.r3.1HG0044670	HORVU.MOREX.r3.7HG0696810	HORVU.MOREX.r3.6HG0573240	HORVU.MOREX.r3.5HG0431160	HORVU.MOREX.r3.3HG0320300	HORVU.MOREX.r3.2HG0197840	HORVU.MOREX.r3.3HG0283630
HORVU.MOREX.r3.1HG0044700	HORVU.MOREX.r3.7HG0696820	HORVU.MOREX.r3.6HG0573250	HORVU.MOREX.r3.5HG0431170	HORVU.MOREX.r3.3HG0320310	HORVU.MOREX.r3.2HG0197850	HORVU.MOREX.r3.3HG0283640
HORVU.MOREX.r3.1HG0044710	HORVU.MOREX.r3.7HG0696890	HORVU.MOREX.r3.6HG0573280	HORVU.MOREX.r3.5HG0431200	HORVU.MOREX.r3.3HG0320350	HORVU.MOREX.r3.2HG0197860	HORVU.MOREX.r3.3HG0283660
HORVU.MOREX.r3.1HG0044750	HORVU.MOREX.r3.7HG0696930	HORVU.MOREX.r3.6HG0573290	HORVU.MOREX.r3.5HG0431210	HORVU.MOREX.r3.3HG0320360	HORVU.MOREX.r3.2HG0197870	HORVU.MOREX.r3.3HG0283670
HORVU.MOREX.r3.1HG0044770	HORVU.MOREX.r3.7HG0696950	HORVU.MOREX.r3.6HG0573300	HORVU.MOREX.r3.5HG0431250	HORVU.MOREX.r3.3HG0320380	HORVU.MOREX.r3.2HG0197880	HORVU.MOREX.r3.3HG0283700
HORVU.MOREX.r3.1HG0044790	HORVU.MOREX.r3.7HG0696960	HORVU.MOREX.r3.6HG0573340	HORVU.MOREX.r3.5HG0431300	HORVU.MOREX.r3.3HG0320390	HORVU.MOREX.r3.2HG0197890	HORVU.MOREX.r3.3HG0283710
HORVU.MOREX.r3.1HG0044800	HORVU.MOREX.r3.7HG0697090	HORVU.MOREX.r3.6HG0573350	HORVU.MOREX.r3.5HG0431360	HORVU.MOREX.r3.3HG0320400	HORVU.MOREX.r3.2HG0197900	HORVU.MOREX.r3.3HG0283720
HORVU.MOREX.r3.1HG0044830	HORVU.MOREX.r3.7HG0697110	HORVU.MOREX.r3.6HG0573390	HORVU.MOREX.r3.5HG0431410	HORVU.MOREX.r3.3HG0320430	HORVU.MOREX.r3.2HG0197910	HORVU.MOREX.r3.3HG0283740
HORVU.MOREX.r3.1HG0044840	HORVU.MOREX.r3.7HG0697160	HORVU.MOREX.r3.6HG0573420	HORVU.MOREX.r3.5HG0431430	HORVU.MOREX.r3.3HG0320480	HORVU.MOREX.r3.2HG0197920	HORVU.MOREX.r3.3HG0283770
HORVU.MOREX.r3.1HG0044850	HORVU.MOREX.r3.7HG0697170	HORVU.MOREX.r3.6HG0573430	HORVU.MOREX.r3.5HG0431450	HORVU.MOREX.r3.3HG0320500	HORVU.MOREX.r3.2HG0197950	HORVU.MOREX.r3.3HG0283800
HORVU.MOREX.r3.1HG0044870	HORVU.MOREX.r3.7HG0697320	HORVU.MOREX.r3.6HG0573510	HORVU.MOREX.r3.5HG0431490	HORVU.MOREX.r3.3HG0320510	HORVU.MOREX.r3.2HG0197960	HORVU.MOREX.r3.3HG0283810
HORVU.MOREX.r3.1HG0044890	HORVU.MOREX.r3.7HG0697350	HORVU.MOREX.r3.6HG0573530	HORVU.MOREX.r3.5HG0431510	HORVU.MOREX.r3.3HG0320520	HORVU.MOREX.r3.2HG0197970	HORVU.MOREX.r3.3HG0283820
HORVU.MOREX.r3.1HG0044910	HORVU.MOREX.r3.7HG0697360	HORVU.MOREX.r3.6HG0573570	HORVU.MOREX.r3.5HG0431560	HORVU.MOREX.r3.3HG0320540	HORVU.MOREX.r3.2HG0198000	HORVU.MOREX.r3.3HG0283870
HORVU.MOREX.r3.1HG0044950	HORVU.MOREX.r3.7HG0697400	HORVU.MOREX.r3.6HG0573590	HORVU.MOREX.r3.5HG0431630	HORVU.MOREX.r3.3HG0320550	HORVU.MOREX.r3.2HG0198010	HORVU.MOREX.r3.3HG0283890
HORVU.MOREX.r3.1HG0044960	HORVU.MOREX.r3.7HG0697420	HORVU.MOREX.r3.6HG0573600	HORVU.MOREX.r3.5HG0431640	HORVU.MOREX.r3.3HG0320580	HORVU.MOREX.r3.2HG0198020	HORVU.MOREX.r3.3HG0283930
HORVU.MOREX.r3.1HG0045000	HORVU.MOREX.r3.7HG0697480	HORVU.MOREX.r3.6HG0573610	HORVU.MOREX.r3.5HG0431690	HORVU.MOREX.r3.3HG0320590	HORVU.MOREX.r3.2HG0198030	HORVU.MOREX.r3.3HG0283970
HORVU.MOREX.r3.1HG0045030	HORVU.MOREX.r3.7HG0697550	HORVU.MOREX.r3.6HG0573620	HORVU.MOREX.r3.5HG0431720	HORVU.MOREX.r3.3HG0320600	HORVU.MOREX.r3.2HG0198040	HORVU.MOREX.r3.3HG0283990
HORVU.MOREX.r3.1HG0045040	HORVU.MOREX.r3.7HG0697570	HORVU.MOREX.r3.6HG0573630	HORVU.MOREX.r3.5HG0431740	HORVU.MOREX.r3.3HG0320650	HORVU.MOREX.r3.2HG0198050	HORVU.MOREX.r3.3HG0284000
HORVU.MOREX.r3.1HG0045060	HORVU.MOREX.r3.7HG0697600	HORVU.MOREX.r3.6HG0573650	HORVU.MOREX.r3.5HG0431750	HORVU.MOREX.r3.3HG0320660	HORVU.MOREX.r3.2HG0198070	HORVU.MOREX.r3.3HG0284010
HORVU.MOREX.r3.1HG0045070	HORVU.MOREX.r3.7HG0697740	HORVU.MOREX.r3.6HG0573670	HORVU.MOREX.r3.5HG0431770	HORVU.MOREX.r3.3HG0320670	HORVU.MOREX.r3.2HG0198090	HORVU.MOREX.r3.3HG0284020
HORVU.MOREX.r3.1HG0045090	HORVU.MOREX.r3.7HG0697780	HORVU.MOREX.r3.6HG0573760	HORVU.MOREX.r3.5HG0431780	HORVU.MOREX.r3.3HG0320690	HORVU.MOREX.r3.2HG0198100	HORVU.MOREX.r3.3HG0284030
HORVU.MOREX.r3.1HG0045140	HORVU.MOREX.r3.7HG0697810	HORVU.MOREX.r3.6HG0573810	HORVU.MOREX.r3.5HG0431790	HORVU.MOREX.r3.3HG0320700	HORVU.MOREX.r3.2HG0198110	HORVU.MOREX.r3.3HG0284050
HORVU.MOREX.r3.1HG0045220	HORVU.MOREX.r3.7HG0697860	HORVU.MOREX.r3.6HG0573820	HORVU.MOREX.r3.5HG0431800	HORVU.MOREX.r3.3HG0320710	HORVU.MOREX.r3.2HG0198130	HORVU.MOREX.r3.3HG0284060
HORVU.MOREX.r3.1HG0045230	HORVU.MOREX.r3.7HG0697890	HORVU.MOREX.r3.6HG0573840	HORVU.MOREX.r3.5HG0431840	HORVU.MOREX.r3.3HG0320720	HORVU.MOREX.r3.2HG0198140	HORVU.MOREX.r3.3HG0284070
HORVU.MOREX.r3.1HG0045350	HORVU.MOREX.r3.7HG0697900	HORVU.MOREX.r3.6HG0573850	HORVU.MOREX.r3.5HG0431860	HORVU.MOREX.r3.3HG0320740	HORVU.MOREX.r3.2HG0198150	HORVU.MOREX.r3.3HG0284080
HORVU.MOREX.r3.1HG0045360	HORVU.MOREX.r3.7HG0697920	HORVU.MOREX.r3.6HG0573870	HORVU.MOREX.r3.5HG0431890	HORVU.MOREX.r3.3HG0320750	HORVU.MOREX.r3.2HG0198180	HORVU.MOREX.r3.3HG0284100
HORVU.MOREX.r3.1HG0045370	HORVU.MOREX.r3.7HG0697940	HORVU.MOREX.r3.6HG0573880	HORVU.MOREX.r3.5HG0431910	HORVU.MOREX.r3.3HG0320770	HORVU.MOREX.r3.2HG0198190	HORVU.MOREX.r3.3HG0284110
HORVU.MOREX.r3.1HG0045390	HORVU.MOREX.r3.7HG0698000	HORVU.MOREX.r3.6HG0573890	HORVU.MOREX.r3.5HG0431960	HORVU.MOREX.r3.3HG0320780	HORVU.MOREX.r3.2HG0198200	HORVU.MOREX.r3.3HG0284120
HORVU.MOREX.r3.1HG0045440	HORVU.MOREX.r3.7HG0698010	HORVU.MOREX.r3.6HG0573900	HORVU.MOREX.r3.5HG0431980	HORVU.MOREX.r3.3HG0320810	HORVU.MOREX.r3.2HG0198220	HORVU.MOREX.r3.3HG0284160
HORVU.MOREX.r3.1HG0045470	HORVU.MOREX.r3.7HG0698100	HORVU.MOREX.r3.6HG0573940	HORVU.MOREX.r3.5HG0431990	HORVU.MOREX.r3.3HG0320820	HORVU.MOREX.r3.2HG0198250	HORVU.MOREX.r3.3HG0284170
HORVU.MOREX.r3.1HG0045490	HORVU.MOREX.r3.7HG0698110	HORVU.MOREX.r3.6HG0573950	HORVU.MOREX.r3.5HG0432030	HORVU.MOREX.r3.3HG0320830	HORVU.MOREX.r3.2HG0198290	HORVU.MOREX.r3.3HG0284180
HORVU.MOREX.r3.1HG0045510	HORVU.MOREX.r3.7HG0698170	HORVU.MOREX.r3.6HG0573960	HORVU.MOREX.r3.5HG0432040	HORVU.MOREX.r3.3HG0320840	HORVU.MOREX.r3.2HG0198300	HORVU.MOREX.r3.3HG0284200
HORVU.MOREX.r3.1HG0045520	HORVU.MOREX.r3.7HG0698220	HORVU.MOREX.r3.6HG0574010	HORVU.MOREX.r3.5HG0432070	HORVU.MOREX.r3.3HG0320850	HORVU.MOREX.r3.2HG0198310	HORVU.MOREX.r3.3HG0284220
HORVU.MOREX.r3.1HG0045530	HORVU.MOREX.r3.7HG0698250	HORVU.MOREX.r3.6HG0574020	HORVU.MOREX.r3.5HG0432080	HORVU.MOREX.r3.3HG0320860	HORVU.MOREX.r3.2HG0198320	HORVU.MOREX.r3.3HG0284240
HORVU.MOREX.r3.1HG0045540	HORVU.MOREX.r3.7HG0698260	HORVU.MOREX.r3.6HG0574030	HORVU.MOREX.r3.5HG0432090	HORVU.MOREX.r3.3HG0320880	HORVU.MOREX.r3.2HG0198330	HORVU.MOREX.r3.3HG0284270
HORVU.MOREX.r3.1HG0045570	HORVU.MOREX.r3.7HG0698270	HORVU.MOREX.r3.6HG0574080	HORVU.MOREX.r3.5HG0432100	HORVU.MOREX.r3.3HG0320900	HORVU.MOREX.r3.2HG0198340	HORVU.MOREX.r3.3HG0284290
HORVU.MOREX.r3.1HG0045660	HORVU.MOREX.r3.7HG0698330	HORVU.MOREX.r3.6HG0574110	HORVU.MOREX.r3.5HG0432110	HORVU.MOREX.r3.3HG0320910	HORVU.MOREX.r3.2HG0198350	HORVU.MOREX.r3.3HG0284310
HORVU.MOREX.r3.1HG0045670	HORVU.MOREX.r3.7HG0698380	HORVU.MOREX.r3.6HG0574120	HORVU.MOREX.r3.5HG0432120	HORVU.MOREX.r3.3HG0320950	HORVU.MOREX.r3.2HG0198370	HORVU.MOREX.r3.3HG0284330
HORVU.MOREX.r3.1HG0045720	HORVU.MOREX.r3.7HG0698390	HORVU.MOREX.r3.6HG0574180	HORVU.MOREX.r3.5HG0432130	HORVU.MOREX.r3.3HG0321010	HORVU.MOREX.r3.2HG0198410	HORVU.MOREX.r3.3HG0284350
HORVU.MOREX.r3.1HG0045730	HORVU.MOREX.r3.7HG0698400	HORVU.MOREX.r3.6HG0574190	HORVU.MOREX.r3.5HG0432240	HORVU.MOREX.r3.3HG0321070	HORVU.MOREX.r3.2HG0198440	HORVU.MOREX.r3.3HG0284360
HORVU.MOREX.r3.1HG0045750	HORVU.MOREX.r3.7HG0698420	HORVU.MOREX.r3.6HG0574230	HORVU.MOREX.r3.5HG0432260	HORVU.MOREX.r3.3HG0321080	HORVU.MOREX.r3.2HG0198450	HORVU.MOREX.r3.3HG0284390
HORVU.MOREX.r3.1HG0045770	HORVU.MOREX.r3.7HG0698430	HORVU.MOREX.r3.6HG0574240	HORVU.MOREX.r3.5HG0432270	HORVU.MOREX.r3.3HG0321090	HORVU.MOREX.r3.2HG0198460	HORVU.MOREX.r3.3HG0284400
HORVU.MOREX.r3.1HG0045790	HORVU.MOREX.r3.7HG0698480	HORVU.MOREX.r3.6HG0574250	HORVU.MOREX.r3.5HG0432280	HORVU.MOREX.r3.3HG0321110	HORVU.MOREX.r3.2HG0198470	HORVU.MOREX.r3.3HG0284430
HORVU.MOREX.r3.1HG0045800	HORVU.MOREX.r3.7HG0698540	HORVU.MOREX.r3.6HG0574260	HORVU.MOREX.r3.5HG0432290	HORVU.MOREX.r3.3HG0321130	HORVU.MOREX.r3.2HG0198490	HORVU.MOREX.r3.3HG0284460
HORVU.MOREX.r3.1HG0045830	HORVU.MOREX.r3.7HG0698550	HORVU.MOREX.r3.6HG0574270	HORVU.MOREX.r3.5HG0432300	HORVU.MOREX.r3.3HG0321140	HORVU.MOREX.r3.2HG0198500	HORVU.MOREX.r3.3HG0284530
HORVU.MOREX.r3.1HG0045860	HORVU.MOREX.r3.7HG0698570	HORVU.MOREX.r3.6HG0574280	HORVU.MOREX.r3.5HG0432340	HORVU.MOREX.r3.3HG0321150	HORVU.MOREX.r3.2HG0198510	HORVU.MOREX.r3.3HG0284540
HORVU.MOREX.r3.1HG0045870	HORVU.MOREX.r3.7HG0698600	HORVU.MOREX.r3.6HG0574290	HORVU.MOREX.r3.5HG0432360	HORVU.MOREX.r3.3HG0321170	HORVU.MOREX.r3.2HG0198530	HORVU.MOREX.r3.3HG0284630
HORVU.MOREX.r3.1HG0045880	HORVU.MOREX.r3.7HG0698870	HORVU.MOREX.r3.6HG0574310	HORVU.MOREX.r3.5HG0432370	HORVU.MOREX.r3.3HG0321180	HORVU.MOREX.r3.2HG0198540	HORVU.MOREX.r3.3HG0284640
HORVU.MOREX.r3.1HG0045890	HORVU.MOREX.r3.7HG0698910	HORVU.MOREX.r3.6HG0574350	HORVU.MOREX.r3.5HG0432380	HORVU.MOREX.r3.3HG0321190	HORVU.MOREX.r3.2HG0198550	HORVU.MOREX.r3.3HG0284680
HORVU.MOREX.r3.1HG0045900	HORVU.MOREX.r3.7HG0698920	HORVU.MOREX.r3.6HG0574360	HORVU.MOREX.r3.5HG0432400	HORVU.MOREX.r3.3HG0321200	HORVU.MOREX.r3.2HG0198560	HORVU.MOREX.r3.3HG0284690
HORVU.MOREX.r3.1HG0045940	HORVU.MOREX.r3.7HG0698940	HORVU.MOREX.r3.6HG0574410	HORVU.MOREX.r3.5HG0432410	HORVU.MOREX.r3.3HG0321210	HORVU.MOREX.r3.2HG0198570	HORVU.MOREX.r3.3HG0284720
HORVU.MOREX.r3.1HG0045950	HORVU.MOREX.r3.7HG0698950	HORVU.MOREX.r3.6HG0574430	HORVU.MOREX.r3.5HG0432480	HORVU.MOREX.r3.3HG0321260	HORVU.MOREX.r3.2HG0198580	HORVU.MOREX.r3.3HG0284730
HORVU.MOREX.r3.1HG0045960	HORVU.MOREX.r3.7HG0698960	HORVU.MOREX.r3.6HG0574460	HORVU.MOREX.r3.5HG0432510	HORVU.MOREX.r3.3HG0321270	HORVU.MOREX.r3.2HG0198590	HORVU.MOREX.r3.3HG0284740
HORVU.MOREX.r3.1HG0045970	HORVU.MOREX.r3.7HG0698990	HORVU.MOREX.r3.6HG0574510	HORVU.MOREX.r3.5HG0432540	HORVU.MOREX.r3.3HG0321290	HORVU.MOREX.r3.2HG0198610	HORVU.MOREX.r3.3HG0284750
HORVU.MOREX.r3.1HG0045980	HORVU.MOREX.r3.7HG0699010	HORVU.MOREX.r3.6HG0574540	HORVU.MOREX.r3.5HG0432550	HORVU.MOREX.r3.3HG0321300	HORVU.MOREX.r3.2HG0198630	HORVU.MOREX.r3.3HG0284760
HORVU.MOREX.r3.1HG0046000	HORVU.MOREX.r3.7HG0699040	HORVU.MOREX.r3.6HG0574550	HORVU.MOREX.r3.5HG0432570	HORVU.MOREX.r3.3HG0321320	HORVU.MOREX.r3.2HG0198640	HORVU.MOREX.r3.3HG0284780
HORVU.MOREX.r3.1HG0046020	HORVU.MOREX.r3.7HG0699070	HORVU.MOREX.r3.6HG0574560	HORVU.MOREX.r3.5HG0432580	HORVU.MOREX.r3.3HG0321330	HORVU.MOREX.r3.2HG0198680	HORVU.MOREX.r3.3HG0284790
HORVU.MOREX.r3.1HG0046030	HORVU.MOREX.r3.7HG0699080	HORVU.MOREX.r3.6HG0574570	HORVU.MOREX.r3.5HG0432590	HORVU.MOREX.r3.3HG0321410	HORVU.MOREX.r3.2HG0198690	HORVU.MOREX.r3.3HG0284810
HORVU.MOREX.r3.1HG0046090	HORVU.MOREX.r3.7HG0699160	HORVU.MOREX.r3.6HG0574580	HORVU.MOREX.r3.5HG0432600	HORVU.MOREX.r3.3HG0321460	HORVU.MOREX.r3.2HG0198700	HORVU.MOREX.r3.3HG0284830
HORVU.MOREX.r3.1HG0046120	HORVU.MOREX.r3.7HG0699170	HORVU.MOREX.r3.6HG0574590	HORVU.MOREX.r3.5HG0432610	HORVU.MOREX.r3.3HG0321490	HORVU.MOREX.r3.2HG0198710	HORVU.MOREX.r3.3HG0284850
HORVU.MOREX.r3.1HG0046150	HORVU.MOREX.r3.7HG0699180	HORVU.MOREX.r3.6HG0574600	HORVU.MOREX.r3.5HG0432620	HORVU.MOREX.r3.3HG0321560	HORVU.MOREX.r3.2HG0198720	HORVU.MOREX.r3.3HG0284860
HORVU.MOREX.r3.1HG0046160	HORVU.MOREX.r3.7HG0699210	HORVU.MOREX.r3.6HG0574610	HORVU.MOREX.r3.5HG0432640	HORVU.MOREX.r3.3HG0321570	HORVU.MOREX.r3.2HG0198730	HORVU.MOREX.r3.3HG0284880
HORVU.MOREX.r3.1HG0046170	HORVU.MOREX.r3.7HG0699240	HORVU.MOREX.r3.6HG0574620	HORVU.MOREX.r3.5HG0432680	HORVU.MOREX.r3.3HG0321580	HORVU.MOREX.r3.2HG0198740	HORVU.MOREX.r3.3HG0284890
HORVU.MOREX.r3.1HG0046180	HORVU.MOREX.r3.7HG0699250	HORVU.MOREX.r3.6HG0574640	HORVU.MOREX.r3.5HG0432690	HORVU.MOREX.r3.3HG0321590	HORVU.MOREX.r3.2HG0198750	HORVU.MOREX.r3.3HG0284900
HORVU.MOREX.r3.1HG0046190	HORVU.MOREX.r3.7HG0699290	HORVU.MOREX.r3.6HG0574650	HORVU.MOREX.r3.5HG0432720	HORVU.MOREX.r3.3HG0321600	HORVU.MOREX.r3.2HG0198780	HORVU.MOREX.r3.3HG0284920
HORVU.MOREX.r3.1HG0046210	HORVU.MOREX.r3.7HG0699300	HORVU.MOREX.r3.6HG0574690	HORVU.MOREX.r3.5HG0432750	HORVU.MOREX.r3.3HG0321630	HORVU.MOREX.r3.2HG0198790	HORVU.MOREX.r3.3HG0284930
HORVU.MOREX.r3.1HG0046230	HORVU.MOREX.r3.7HG0699350	HORVU.MOREX.r3.6HG0574710	HORVU.MOREX.r3.5HG0432780	HORVU.MOREX.r3.3HG0321640	HORVU.MOREX.r3.2HG0198800	HORVU.MOREX.r3.3HG0284940
HORVU.MOREX.r3.1HG0046270	HORVU.MOREX.r3.7HG0699360	HORVU.MOREX.r3.6HG0574750	HORVU.MOREX.r3.5HG0432820	HORVU.MOREX.r3.3HG0321650	HORVU.MOREX.r3.2HG0198920	HORVU.MOREX.r3.3HG0284960
HORVU.MOREX.r3.1HG0046280	HORVU.MOREX.r3.7HG0699410	HORVU.MOREX.r3.6HG0574770	HORVU.MOREX.r3.5HG0432850	HORVU.MOREX.r3.3HG0321670	HORVU.MOREX.r3.2HG0198940	HORVU.MOREX.r3.3HG0284970
HORVU.MOREX.r3.1HG0046290	HORVU.MOREX.r3.7HG0699510	HORVU.MOREX.r3.6HG0574800	HORVU.MOREX.r3.5HG0432870	HORVU.MOREX.r3.3HG0321680	HORVU.MOREX.r3.2HG0199010	HORVU.MOREX.r3.3HG0284990
HORVU.MOREX.r3.1HG0046300	HORVU.MOREX.r3.7HG0699630	HORVU.MOREX.r3.6HG0574810	HORVU.MOREX.r3.5HG0432920	HORVU.MOREX.r3.3HG0321690	HORVU.MOREX.r3.2HG0199030	HORVU.MOREX.r3.3HG0285000
HORVU.MOREX.r3.1HG0046320	HORVU.MOREX.r3.7HG0699670	HORVU.MOREX.r3.6HG0574840	HORVU.MOREX.r3.5HG0432930	HORVU.MOREX.r3.3HG0321700	HORVU.MOREX.r3.2HG0199040	HORVU.MOREX.r3.3HG0285010
HORVU.MOREX.r3.1HG0046330	HORVU.MOREX.r3.7HG0699680	HORVU.MOREX.r3.6HG0574850	HORVU.MOREX.r3.5HG0432940	HORVU.MOREX.r3.3HG0321710	HORVU.MOREX.r3.2HG0199050	HORVU.MOREX.r3.3HG0285020
HORVU.MOREX.r3.1HG0046370	HORVU.MOREX.r3.7HG0699700	HORVU.MOREX.r3.6HG0574860	HORVU.MOREX.r3.5HG0432950	HORVU.MOREX.r3.3HG0321720	HORVU.MOREX.r3.2HG0199060	HORVU.MOREX.r3.3HG0285050
HORVU.MOREX.r3.1HG0046400	HORVU.MOREX.r3.7HG0699790	HORVU.MOREX.r3.6HG0574880	HORVU.MOREX.r3.5HG0433050	HORVU.MOREX.r3.3HG0321760	HORVU.MOREX.r3.2HG0199100	HORVU.MOREX.r3.3HG0285060
HORVU.MOREX.r3.1HG0046420	HORVU.MOREX.r3.7HG0699810	HORVU.MOREX.r3.6HG0574910	HORVU.MOREX.r3.5HG0433060	HORVU.MOREX.r3.3HG0321770	HORVU.MOREX.r3.2HG0199120	HORVU.MOREX.r3.3HG0285070
HORVU.MOREX.r3.1HG0046440	HORVU.MOREX.r3.7HG0699820	HORVU.MOREX.r3.6HG0574920	HORVU.MOREX.r3.5HG0433070	HORVU.MOREX.r3.3HG0321790	HORVU.MOREX.r3.2HG0199130	HORVU.MOREX.r3.3HG0285090
HORVU.MOREX.r3.1HG0046450	HORVU.MOREX.r3.7HG0699880	HORVU.MOREX.r3.6HG0574940	HORVU.MOREX.r3.5HG0433130	HORVU.MOREX.r3.3HG0321840	HORVU.MOREX.r3.2HG0199140	HORVU.MOREX.r3.3HG0285100
HORVU.MOREX.r3.1HG0046460	HORVU.MOREX.r3.7HG0699900	HORVU.MOREX.r3.6HG0574950	HORVU.MOREX.r3.5HG0433140	HORVU.MOREX.r3.3HG0321860	HORVU.MOREX.r3.2HG0199150	HORVU.MOREX.r3.3HG0285110
HORVU.MOREX.r3.1HG0046470	HORVU.MOREX.r3.7HG0699910	HORVU.MOREX.r3.6HG0574960	HORVU.MOREX.r3.5HG0433150	HORVU.MOREX.r3.3HG0321880	HORVU.MOREX.r3.2HG0199160	HORVU.MOREX.r3.3HG0285150
HORVU.MOREX.r3.1HG0046510	HORVU.MOREX.r3.7HG0699930	HORVU.MOREX.r3.6HG0574980	HORVU.MOREX.r3.5HG0433160	HORVU.MOREX.r3.3HG0321920	HORVU.MOREX.r3.2HG0199210	HORVU.MOREX.r3.3HG0285160
HORVU.MOREX.r3.1HG0046520	HORVU.MOREX.r3.7HG0699970	HORVU.MOREX.r3.6HG0574990	HORVU.MOREX.r3.5HG0433170	HORVU.MOREX.r3.3HG0321930	HORVU.MOREX.r3.2HG0199250	HORVU.MOREX.r3.3HG0285170
HORVU.MOREX.r3.1HG0046540	HORVU.MOREX.r3.7HG0700030	HORVU.MOREX.r3.6HG0575000	HORVU.MOREX.r3.5HG0433180	HORVU.MOREX.r3.3HG0321940	HORVU.MOREX.r3.2HG0199260	HORVU.MOREX.r3.3HG0285210
HORVU.MOREX.r3.1HG0046550	HORVU.MOREX.r3.7HG0700100	HORVU.MOREX.r3.6HG0575010	HORVU.MOREX.r3.5HG0433190	HORVU.MOREX.r3.3HG0321990	HORVU.MOREX.r3.2HG0199290	HORVU.MOREX.r3.4HG0397310
HORVU.MOREX.r3.1HG0046570	HORVU.MOREX.r3.7HG0700120	HORVU.MOREX.r3.6HG0575020	HORVU.MOREX.r3.5HG0433220	HORVU.MOREX.r3.3HG0322010	HORVU.MOREX.r3.2HG0199300	HORVU.MOREX.r3.4HG0397330
HORVU.MOREX.r3.1HG0046650	HORVU.MOREX.r3.7HG0700200	HORVU.MOREX.r3.6HG0575030	HORVU.MOREX.r3.5HG0433240	HORVU.MOREX.r3.3HG0322040	HORVU.MOREX.r3.2HG0199330	HORVU.MOREX.r3.4HG0397340
HORVU.MOREX.r3.1HG0046660	HORVU.MOREX.r3.7HG0700210	HORVU.MOREX.r3.6HG0575050	HORVU.MOREX.r3.5HG0433250	HORVU.MOREX.r3.3HG0322050	HORVU.MOREX.r3.2HG0199350	HORVU.MOREX.r3.4HG0397360
HORVU.MOREX.r3.1HG0046690	HORVU.MOREX.r3.7HG0700240	HORVU.MOREX.r3.6HG0575080	HORVU.MOREX.r3.5HG0433300	HORVU.MOREX.r3.3HG0322060	HORVU.MOREX.r3.2HG0199370	HORVU.MOREX.r3.4HG0397370
HORVU.MOREX.r3.1HG0046700	HORVU.MOREX.r3.7HG0700250	HORVU.MOREX.r3.6HG0575120	HORVU.MOREX.r3.5HG0433380	HORVU.MOREX.r3.3HG0322070	HORVU.MOREX.r3.2HG0199390	HORVU.MOREX.r3.4HG0397390
HORVU.MOREX.r3.1HG0046710	HORVU.MOREX.r3.7HG0700270	HORVU.MOREX.r3.6HG0575140	HORVU.MOREX.r3.5HG0433390	HORVU.MOREX.r3.3HG0322080	HORVU.MOREX.r3.2HG0199400	HORVU.MOREX.r3.4HG0397410
HORVU.MOREX.r3.1HG0046760	HORVU.MOREX.r3.7HG0700280	HORVU.MOREX.r3.6HG0575170	HORVU.MOREX.r3.5HG0433410	HORVU.MOREX.r3.3HG0322090	HORVU.MOREX.r3.2HG0199420	HORVU.MOREX.r3.4HG0397450
HORVU.MOREX.r3.1HG0046770	HORVU.MOREX.r3.7HG0700290	HORVU.MOREX.r3.6HG0575220	HORVU.MOREX.r3.5HG0433420	HORVU.MOREX.r3.3HG0322130	HORVU.MOREX.r3.2HG0199430	HORVU.MOREX.r3.4HG0397460
HORVU.MOREX.r3.1HG0046780	HORVU.MOREX.r3.7HG0700300	HORVU.MOREX.r3.6HG0575230	HORVU.MOREX.r3.5HG0433430	HORVU.MOREX.r3.3HG0322140	HORVU.MOREX.r3.2HG0199440	HORVU.MOREX.r3.4HG0397470
HORVU.MOREX.r3.1HG0046810	HORVU.MOREX.r3.7HG0700320	HORVU.MOREX.r3.6HG0575240	HORVU.MOREX.r3.5HG0433440	HORVU.MOREX.r3.3HG0322150	HORVU.MOREX.r3.2HG0199500	HORVU.MOREX.r3.4HG0397500
HORVU.MOREX.r3.1HG0046830	HORVU.MOREX.r3.7HG0700330	HORVU.MOREX.r3.6HG0575250	HORVU.MOREX.r3.5HG0433470	HORVU.MOREX.r3.3HG0322170	HORVU.MOREX.r3.2HG0199510	HORVU.MOREX.r3.4HG0397510
HORVU.MOREX.r3.1HG0046850	HORVU.MOREX.r3.7HG0700360	HORVU.MOREX.r3.6HG0575260	HORVU.MOREX.r3.5HG0433480	HORVU.MOREX.r3.3HG0322180	HORVU.MOREX.r3.2HG0199540	HORVU.MOREX.r3.4HG0397520
HORVU.MOREX.r3.1HG0046880	HORVU.MOREX.r3.7HG0700370	HORVU.MOREX.r3.6HG0575310	HORVU.MOREX.r3.5HG0433490	HORVU.MOREX.r3.3HG0322200	HORVU.MOREX.r3.2HG0199550	HORVU.MOREX.r3.4HG0397530
HORVU.MOREX.r3.1HG0046890	HORVU.MOREX.r3.7HG0700400	HORVU.MOREX.r3.6HG0575340	HORVU.MOREX.r3.5HG0433510	HORVU.MOREX.r3.3HG0322210	HORVU.MOREX.r3.2HG0199560	HORVU.MOREX.r3.4HG0397540
HORVU.MOREX.r3.1HG0046900	HORVU.MOREX.r3.7HG0700410	HORVU.MOREX.r3.6HG0575360	HORVU.MOREX.r3.5HG0433530	HORVU.MOREX.r3.3HG0322270	HORVU.MOREX.r3.2HG0199590	HORVU.MOREX.r3.4HG0397570
HORVU.MOREX.r3.1HG0046920	HORVU.MOREX.r3.7HG0700420	HORVU.MOREX.r3.6HG0575410	HORVU.MOREX.r3.5HG0433570	HORVU.MOREX.r3.3HG0322290	HORVU.MOREX.r3.2HG0199600	HORVU.MOREX.r3.4HG0397580
HORVU.MOREX.r3.1HG0046940	HORVU.MOREX.r3.7HG0700440	HORVU.MOREX.r3.6HG0575530	HORVU.MOREX.r3.5HG0433580	HORVU.MOREX.r3.3HG0322340	HORVU.MOREX.r3.2HG0199610	HORVU.MOREX.r3.4HG0397600
HORVU.MOREX.r3.1HG0046960	HORVU.MOREX.r3.7HG0700460	HORVU.MOREX.r3.6HG0575540	HORVU.MOREX.r3.5HG0433590	HORVU.MOREX.r3.3HG0322360	HORVU.MOREX.r3.2HG0199620	HORVU.MOREX.r3.4HG0397610
HORVU.MOREX.r3.1HG0047060	HORVU.MOREX.r3.7HG0700480	HORVU.MOREX.r3.6HG0575570	HORVU.MOREX.r3.5HG0433610	HORVU.MOREX.r3.3HG0322380	HORVU.MOREX.r3.2HG0199650	HORVU.MOREX.r3.4HG0397620
HORVU.MOREX.r3.1HG0047080	HORVU.MOREX.r3.7HG0700490	HORVU.MOREX.r3.6HG0575580	HORVU.MOREX.r3.5HG0433640	HORVU.MOREX.r3.3HG0322390	HORVU.MOREX.r3.2HG0199660	HORVU.MOREX.r3.4HG0397630
HORVU.MOREX.r3.1HG0047090	HORVU.MOREX.r3.7HG0700500	HORVU.MOREX.r3.6HG0575600	HORVU.MOREX.r3.5HG0433650	HORVU.MOREX.r3.3HG0322400	HORVU.MOREX.r3.2HG0199680	HORVU.MOREX.r3.4HG0397640
HORVU.MOREX.r3.1HG0047100	HORVU.MOREX.r3.7HG0700570	HORVU.MOREX.r3.6HG0575620	HORVU.MOREX.r3.5HG0433660	HORVU.MOREX.r3.3HG0322410	HORVU.MOREX.r3.2HG0199690	HORVU.MOREX.r3.4HG0397660
HORVU.MOREX.r3.1HG0047110	HORVU.MOREX.r3.7HG0700600	HORVU.MOREX.r3.6HG0575630	HORVU.MOREX.r3.5HG0433670	HORVU.MOREX.r3.3HG0322440	HORVU.MOREX.r3.2HG0199700	HORVU.MOREX.r3.4HG0397670
HORVU.MOREX.r3.1HG0047120	HORVU.MOREX.r3.7HG0700630	HORVU.MOREX.r3.6HG0575640	HORVU.MOREX.r3.5HG0433680	HORVU.MOREX.r3.3HG0322450	HORVU.MOREX.r3.2HG0199710	HORVU.MOREX.r3.4HG0397690
HORVU.MOREX.r3.1HG0047130	HORVU.MOREX.r3.7HG0700690	HORVU.MOREX.r3.6HG0575650	HORVU.MOREX.r3.5HG0433690	HORVU.MOREX.r3.3HG0322460	HORVU.MOREX.r3.2HG0199720	HORVU.MOREX.r3.4HG0397740
HORVU.MOREX.r3.1HG0047150	HORVU.MOREX.r3.7HG0700750	HORVU.MOREX.r3.6HG0575670	HORVU.MOREX.r3.5HG0433720	HORVU.MOREX.r3.3HG0322490	HORVU.MOREX.r3.2HG0199790	HORVU.MOREX.r3.4HG0397770
HORVU.MOREX.r3.1HG0047200	HORVU.MOREX.r3.7HG0700760	HORVU.MOREX.r3.6HG0575680	HORVU.MOREX.r3.5HG0433730	HORVU.MOREX.r3.3HG0322520	HORVU.MOREX.r3.2HG0199820	HORVU.MOREX.r3.4HG0397780
HORVU.MOREX.r3.1HG0047240	HORVU.MOREX.r3.7HG0700790	HORVU.MOREX.r3.6HG0575690	HORVU.MOREX.r3.5HG0433750	HORVU.MOREX.r3.3HG0322540	HORVU.MOREX.r3.2HG0199850	HORVU.MOREX.r3.4HG0397790
HORVU.MOREX.r3.1HG0047250	HORVU.MOREX.r3.7HG0700810	HORVU.MOREX.r3.6HG0575700	HORVU.MOREX.r3.5HG0433760	HORVU.MOREX.r3.3HG0322550	HORVU.MOREX.r3.2HG0199860	HORVU.MOREX.r3.4HG0397800
HORVU.MOREX.r3.1HG0047260	HORVU.MOREX.r3.7HG0700830	HORVU.MOREX.r3.6HG0575710	HORVU.MOREX.r3.5HG0433770	HORVU.MOREX.r3.3HG0322580	HORVU.MOREX.r3.2HG0199880	HORVU.MOREX.r3.4HG0397810
HORVU.MOREX.r3.1HG0047280	HORVU.MOREX.r3.7HG0700840	HORVU.MOREX.r3.6HG0575740	HORVU.MOREX.r3.5HG0433780	HORVU.MOREX.r3.3HG0322600	HORVU.MOREX.r3.2HG0199920	HORVU.MOREX.r3.4HG0397820
HORVU.MOREX.r3.1HG0047290	HORVU.MOREX.r3.7HG0700930	HORVU.MOREX.r3.6HG0575780	HORVU.MOREX.r3.5HG0433830	HORVU.MOREX.r3.3HG0322610	HORVU.MOREX.r3.2HG0199930	HORVU.MOREX.r3.4HG0397830
HORVU.MOREX.r3.1HG0047310	HORVU.MOREX.r3.7HG0700940	HORVU.MOREX.r3.6HG0575810	HORVU.MOREX.r3.5HG0433840	HORVU.MOREX.r3.3HG0322650	HORVU.MOREX.r3.2HG0199950	HORVU.MOREX.r3.4HG0397840
HORVU.MOREX.r3.1HG0047320	HORVU.MOREX.r3.7HG0700950	HORVU.MOREX.r3.6HG0575870	HORVU.MOREX.r3.5HG0433910	HORVU.MOREX.r3.3HG0322660	HORVU.MOREX.r3.2HG0199960	HORVU.MOREX.r3.4HG0397850
HORVU.MOREX.r3.1HG0047430	HORVU.MOREX.r3.7HG0700970	HORVU.MOREX.r3.6HG0575920	HORVU.MOREX.r3.5HG0433990	HORVU.MOREX.r3.3HG0322680	HORVU.MOREX.r3.2HG0199970	HORVU.MOREX.r3.4HG0397860
HORVU.MOREX.r3.1HG0047440	HORVU.MOREX.r3.7HG0701020	HORVU.MOREX.r3.6HG0575960	HORVU.MOREX.r3.5HG0434000	HORVU.MOREX.r3.3HG0322690	HORVU.MOREX.r3.2HG0199980	HORVU.MOREX.r3.4HG0397870
HORVU.MOREX.r3.1HG0047460	HORVU.MOREX.r3.7HG0701030	HORVU.MOREX.r3.6HG0575970	HORVU.MOREX.r3.5HG0434020	HORVU.MOREX.r3.3HG0322740	HORVU.MOREX.r3.2HG0199990	HORVU.MOREX.r3.4HG0397890
HORVU.MOREX.r3.1HG0047470	HORVU.MOREX.r3.7HG0701060	HORVU.MOREX.r3.6HG0576010	HORVU.MOREX.r3.5HG0434140	HORVU.MOREX.r3.3HG0322770	HORVU.MOREX.r3.2HG0200000	HORVU.MOREX.r3.4HG0397900
HORVU.MOREX.r3.1HG0047480	HORVU.MOREX.r3.7HG0701080	HORVU.MOREX.r3.6HG0576020	HORVU.MOREX.r3.5HG0434150	HORVU.MOREX.r3.3HG0322780	HORVU.MOREX.r3.2HG0200030	HORVU.MOREX.r3.4HG0397920
HORVU.MOREX.r3.1HG0047500	HORVU.MOREX.r3.7HG0701110	HORVU.MOREX.r3.6HG0576050	HORVU.MOREX.r3.5HG0434160	HORVU.MOREX.r3.3HG0322830	HORVU.MOREX.r3.2HG0200040	HORVU.MOREX.r3.4HG0397940
HORVU.MOREX.r3.1HG0047510	HORVU.MOREX.r3.7HG0701130	HORVU.MOREX.r3.6HG0576070	HORVU.MOREX.r3.5HG0434170	HORVU.MOREX.r3.3HG0322850	HORVU.MOREX.r3.2HG0200050	HORVU.MOREX.r3.4HG0397950
HORVU.MOREX.r3.1HG0047580	HORVU.MOREX.r3.7HG0701140	HORVU.MOREX.r3.6HG0576100	HORVU.MOREX.r3.5HG0434180	HORVU.MOREX.r3.3HG0322860	HORVU.MOREX.r3.2HG0200060	HORVU.MOREX.r3.4HG0397970
HORVU.MOREX.r3.1HG0047590	HORVU.MOREX.r3.7HG0701150	HORVU.MOREX.r3.6HG0576120	HORVU.MOREX.r3.5HG0434210	HORVU.MOREX.r3.3HG0322890	HORVU.MOREX.r3.2HG0200070	HORVU.MOREX.r3.4HG0397980
HORVU.MOREX.r3.1HG0047600	HORVU.MOREX.r3.7HG0701210	HORVU.MOREX.r3.6HG0576160	HORVU.MOREX.r3.5HG0434220	HORVU.MOREX.r3.3HG0322900	HORVU.MOREX.r3.2HG0200080	HORVU.MOREX.r3.4HG0397990
HORVU.MOREX.r3.1HG0047620	HORVU.MOREX.r3.7HG0701240	HORVU.MOREX.r3.6HG0576180	HORVU.MOREX.r3.5HG0434230	HORVU.MOREX.r3.3HG0322910	HORVU.MOREX.r3.2HG0200100	HORVU.MOREX.r3.4HG0398010
HORVU.MOREX.r3.1HG0047660	HORVU.MOREX.r3.7HG0701250	HORVU.MOREX.r3.6HG0576190	HORVU.MOREX.r3.5HG0434250	HORVU.MOREX.r3.3HG0322950	HORVU.MOREX.r3.2HG0200110	HORVU.MOREX.r3.4HG0398040
HORVU.MOREX.r3.1HG0047670	HORVU.MOREX.r3.7HG0701260	HORVU.MOREX.r3.6HG0576230	HORVU.MOREX.r3.5HG0434270	HORVU.MOREX.r3.3HG0322970	HORVU.MOREX.r3.2HG0200120	HORVU.MOREX.r3.4HG0398050
HORVU.MOREX.r3.1HG0047680	HORVU.MOREX.r3.7HG0701270	HORVU.MOREX.r3.6HG0576260	HORVU.MOREX.r3.5HG0434380	HORVU.MOREX.r3.3HG0322980	HORVU.MOREX.r3.2HG0200160	HORVU.MOREX.r3.4HG0398060
HORVU.MOREX.r3.1HG0047710	HORVU.MOREX.r3.7HG0701280	HORVU.MOREX.r3.6HG0576290	HORVU.MOREX.r3.5HG0434440	HORVU.MOREX.r3.3HG0323000	HORVU.MOREX.r3.2HG0200170	HORVU.MOREX.r3.4HG0398070
HORVU.MOREX.r3.1HG0047720	HORVU.MOREX.r3.7HG0701290	HORVU.MOREX.r3.6HG0576300	HORVU.MOREX.r3.5HG0434480	HORVU.MOREX.r3.3HG0323020	HORVU.MOREX.r3.2HG0200200	HORVU.MOREX.r3.4HG0398090
HORVU.MOREX.r3.1HG0047780	HORVU.MOREX.r3.7HG0701300	HORVU.MOREX.r3.6HG0576310	HORVU.MOREX.r3.5HG0434930	HORVU.MOREX.r3.3HG0323030	HORVU.MOREX.r3.2HG0200210	HORVU.MOREX.r3.4HG0398100
HORVU.MOREX.r3.1HG0047850	HORVU.MOREX.r3.7HG0701320	HORVU.MOREX.r3.6HG0576360	HORVU.MOREX.r3.5HG0435440	HORVU.MOREX.r3.3HG0323040	HORVU.MOREX.r3.2HG0200240	HORVU.MOREX.r3.4HG0398120
HORVU.MOREX.r3.1HG0047910	HORVU.MOREX.r3.7HG0701360	HORVU.MOREX.r3.6HG0576370	HORVU.MOREX.r3.5HG0435490	HORVU.MOREX.r3.3HG0323090	HORVU.MOREX.r3.2HG0200260	HORVU.MOREX.r3.4HG0398130
HORVU.MOREX.r3.1HG0047950	HORVU.MOREX.r3.7HG0701390	HORVU.MOREX.r3.6HG0576400	HORVU.MOREX.r3.5HG0435530	HORVU.MOREX.r3.3HG0323100	HORVU.MOREX.r3.2HG0200270	HORVU.MOREX.r3.4HG0398140
HORVU.MOREX.r3.1HG0047970	HORVU.MOREX.r3.7HG0701420	HORVU.MOREX.r3.6HG0576420	HORVU.MOREX.r3.5HG0435610	HORVU.MOREX.r3.3HG0323120	HORVU.MOREX.r3.2HG0200280	HORVU.MOREX.r3.4HG0398150
HORVU.MOREX.r3.1HG0047980	HORVU.MOREX.r3.7HG0701430	HORVU.MOREX.r3.6HG0576480	HORVU.MOREX.r3.5HG0435650	HORVU.MOREX.r3.3HG0323140	HORVU.MOREX.r3.2HG0200290	HORVU.MOREX.r3.4HG0398160
HORVU.MOREX.r3.1HG0048010	HORVU.MOREX.r3.7HG0701460	HORVU.MOREX.r3.6HG0576520	HORVU.MOREX.r3.5HG0435740	HORVU.MOREX.r3.3HG0323150	HORVU.MOREX.r3.2HG0200300	HORVU.MOREX.r3.4HG0398200
HORVU.MOREX.r3.1HG0048030	HORVU.MOREX.r3.7HG0701470	HORVU.MOREX.r3.6HG0576530	HORVU.MOREX.r3.5HG0435760	HORVU.MOREX.r3.3HG0323220	HORVU.MOREX.r3.2HG0200310	HORVU.MOREX.r3.4HG0398220
HORVU.MOREX.r3.1HG0048040	HORVU.MOREX.r3.7HG0701540	HORVU.MOREX.r3.6HG0576550	HORVU.MOREX.r3.5HG0435820	HORVU.MOREX.r3.3HG0323240	HORVU.MOREX.r3.2HG0200320	HORVU.MOREX.r3.4HG0398240
HORVU.MOREX.r3.1HG0048060	HORVU.MOREX.r3.7HG0701550	HORVU.MOREX.r3.6HG0576570	HORVU.MOREX.r3.5HG0435850	HORVU.MOREX.r3.3HG0323250	HORVU.MOREX.r3.2HG0200330	HORVU.MOREX.r3.4HG0398250
HORVU.MOREX.r3.1HG0048070	HORVU.MOREX.r3.7HG0701560	HORVU.MOREX.r3.6HG0576780	HORVU.MOREX.r3.5HG0435960	HORVU.MOREX.r3.3HG0323260	HORVU.MOREX.r3.2HG0200340	HORVU.MOREX.r3.4HG0398270
HORVU.MOREX.r3.1HG0048080	HORVU.MOREX.r3.7HG0701580	HORVU.MOREX.r3.6HG0576810	HORVU.MOREX.r3.5HG0435980	HORVU.MOREX.r3.3HG0323270	HORVU.MOREX.r3.2HG0200360	HORVU.MOREX.r3.4HG0398300
HORVU.MOREX.r3.1HG0048090	HORVU.MOREX.r3.7HG0701610	HORVU.MOREX.r3.6HG0576830	HORVU.MOREX.r3.5HG0436000	HORVU.MOREX.r3.3HG0323280	HORVU.MOREX.r3.2HG0200370	HORVU.MOREX.r3.4HG0398310
HORVU.MOREX.r3.1HG0048100	HORVU.MOREX.r3.7HG0701620	HORVU.MOREX.r3.6HG0576850	HORVU.MOREX.r3.5HG0436050	HORVU.MOREX.r3.3HG0323310	HORVU.MOREX.r3.2HG0200380	HORVU.MOREX.r3.4HG0398320
HORVU.MOREX.r3.1HG0048110	HORVU.MOREX.r3.7HG0701630	HORVU.MOREX.r3.6HG0576880	HORVU.MOREX.r3.5HG0436070	HORVU.MOREX.r3.3HG0323320	HORVU.MOREX.r3.2HG0200390	HORVU.MOREX.r3.4HG0398330
HORVU.MOREX.r3.1HG0048120	HORVU.MOREX.r3.7HG0701640	HORVU.MOREX.r3.6HG0576890	HORVU.MOREX.r3.5HG0436090	HORVU.MOREX.r3.3HG0323330	HORVU.MOREX.r3.2HG0200430	HORVU.MOREX.r3.4HG0398350
HORVU.MOREX.r3.1HG0048140	HORVU.MOREX.r3.7HG0701650	HORVU.MOREX.r3.6HG0576950	HORVU.MOREX.r3.5HG0436160	HORVU.MOREX.r3.3HG0323340	HORVU.MOREX.r3.2HG0200440	HORVU.MOREX.r3.4HG0398360
HORVU.MOREX.r3.1HG0048180	HORVU.MOREX.r3.7HG0701760	HORVU.MOREX.r3.6HG0577000	HORVU.MOREX.r3.5HG0436190	HORVU.MOREX.r3.3HG0323360	HORVU.MOREX.r3.2HG0200450	HORVU.MOREX.r3.4HG0398390
HORVU.MOREX.r3.1HG0048210	HORVU.MOREX.r3.7HG0701900	HORVU.MOREX.r3.6HG0577010	HORVU.MOREX.r3.5HG0436210	HORVU.MOREX.r3.3HG0323370	HORVU.MOREX.r3.2HG0200460	HORVU.MOREX.r3.4HG0398400
HORVU.MOREX.r3.1HG0048240	HORVU.MOREX.r3.7HG0701910	HORVU.MOREX.r3.6HG0577040	HORVU.MOREX.r3.5HG0436250	HORVU.MOREX.r3.3HG0323380	HORVU.MOREX.r3.2HG0200470	HORVU.MOREX.r3.4HG0398420
HORVU.MOREX.r3.1HG0048320	HORVU.MOREX.r3.7HG0701930	HORVU.MOREX.r3.6HG0577120	HORVU.MOREX.r3.5HG0436260	HORVU.MOREX.r3.3HG0323390	HORVU.MOREX.r3.2HG0200490	HORVU.MOREX.r3.4HG0398430
HORVU.MOREX.r3.1HG0048360	HORVU.MOREX.r3.7HG0701970	HORVU.MOREX.r3.6HG0577130	HORVU.MOREX.r3.5HG0436270	HORVU.MOREX.r3.3HG0323400	HORVU.MOREX.r3.2HG0200500	HORVU.MOREX.r3.4HG0398440
HORVU.MOREX.r3.1HG0048400	HORVU.MOREX.r3.7HG0701980	HORVU.MOREX.r3.6HG0577160	HORVU.MOREX.r3.5HG0436340	HORVU.MOREX.r3.3HG0323410	HORVU.MOREX.r3.2HG0200510	HORVU.MOREX.r3.4HG0398450
HORVU.MOREX.r3.1HG0048410	HORVU.MOREX.r3.7HG0702000	HORVU.MOREX.r3.6HG0577170	HORVU.MOREX.r3.5HG0436390	HORVU.MOREX.r3.3HG0323430	HORVU.MOREX.r3.2HG0200520	HORVU.MOREX.r3.4HG0398460
HORVU.MOREX.r3.1HG0048520	HORVU.MOREX.r3.7HG0702010	HORVU.MOREX.r3.6HG0577180	HORVU.MOREX.r3.5HG0436490	HORVU.MOREX.r3.3HG0323440	HORVU.MOREX.r3.2HG0200530	HORVU.MOREX.r3.4HG0398470
HORVU.MOREX.r3.1HG0048530	HORVU.MOREX.r3.7HG0702050	HORVU.MOREX.r3.6HG0577220	HORVU.MOREX.r3.5HG0436510	HORVU.MOREX.r3.3HG0323480	HORVU.MOREX.r3.2HG0200560	HORVU.MOREX.r3.4HG0398480
HORVU.MOREX.r3.1HG0048590	HORVU.MOREX.r3.7HG0702070	HORVU.MOREX.r3.6HG0577300	HORVU.MOREX.r3.5HG0436530	HORVU.MOREX.r3.3HG0323490	HORVU.MOREX.r3.2HG0200580	HORVU.MOREX.r3.4HG0398490
HORVU.MOREX.r3.1HG0048670	HORVU.MOREX.r3.7HG0702090	HORVU.MOREX.r3.6HG0577330	HORVU.MOREX.r3.5HG0436580	HORVU.MOREX.r3.3HG0323510	HORVU.MOREX.r3.2HG0200630	HORVU.MOREX.r3.4HG0398520
HORVU.MOREX.r3.1HG0048740	HORVU.MOREX.r3.7HG0702100	HORVU.MOREX.r3.6HG0577340	HORVU.MOREX.r3.5HG0436590	HORVU.MOREX.r3.3HG0323520	HORVU.MOREX.r3.2HG0200640	HORVU.MOREX.r3.4HG0398540
HORVU.MOREX.r3.1HG0048770	HORVU.MOREX.r3.7HG0702190	HORVU.MOREX.r3.6HG0577350	HORVU.MOREX.r3.5HG0436600	HORVU.MOREX.r3.3HG0323570	HORVU.MOREX.r3.2HG0200650	HORVU.MOREX.r3.4HG0398550
HORVU.MOREX.r3.1HG0048790	HORVU.MOREX.r3.7HG0702200	HORVU.MOREX.r3.6HG0577360	HORVU.MOREX.r3.5HG0436620	HORVU.MOREX.r3.3HG0323580	HORVU.MOREX.r3.2HG0200660	HORVU.MOREX.r3.4HG0398570
HORVU.MOREX.r3.1HG0048800	HORVU.MOREX.r3.7HG0702220	HORVU.MOREX.r3.6HG0577410	HORVU.MOREX.r3.5HG0436630	HORVU.MOREX.r3.3HG0323600	HORVU.MOREX.r3.2HG0200690	HORVU.MOREX.r3.4HG0398610
HORVU.MOREX.r3.1HG0048820	HORVU.MOREX.r3.7HG0702290	HORVU.MOREX.r3.6HG0577480	HORVU.MOREX.r3.5HG0436640	HORVU.MOREX.r3.3HG0323610	HORVU.MOREX.r3.2HG0200730	HORVU.MOREX.r3.4HG0398620
HORVU.MOREX.r3.1HG0048830	HORVU.MOREX.r3.7HG0702350	HORVU.MOREX.r3.6HG0577530	HORVU.MOREX.r3.5HG0436650	HORVU.MOREX.r3.3HG0323620	HORVU.MOREX.r3.2HG0200740	HORVU.MOREX.r3.4HG0398650
HORVU.MOREX.r3.1HG0048840	HORVU.MOREX.r3.7HG0702360	HORVU.MOREX.r3.6HG0577560	HORVU.MOREX.r3.5HG0436660	HORVU.MOREX.r3.3HG0323630	HORVU.MOREX.r3.2HG0200760	HORVU.MOREX.r3.4HG0398660
HORVU.MOREX.r3.1HG0048850	HORVU.MOREX.r3.7HG0702380	HORVU.MOREX.r3.6HG0577580	HORVU.MOREX.r3.5HG0436680	HORVU.MOREX.r3.3HG0323640	HORVU.MOREX.r3.2HG0200770	HORVU.MOREX.r3.4HG0398720
HORVU.MOREX.r3.1HG0048880	HORVU.MOREX.r3.7HG0702390	HORVU.MOREX.r3.6HG0577590	HORVU.MOREX.r3.5HG0436720	HORVU.MOREX.r3.3HG0323650	HORVU.MOREX.r3.2HG0200780	HORVU.MOREX.r3.4HG0398730
HORVU.MOREX.r3.1HG0048890	HORVU.MOREX.r3.7HG0702400	HORVU.MOREX.r3.6HG0577600	HORVU.MOREX.r3.5HG0436730	HORVU.MOREX.r3.3HG0323660	HORVU.MOREX.r3.2HG0200810	HORVU.MOREX.r3.5HG0531440
HORVU.MOREX.r3.1HG0048900	HORVU.MOREX.r3.7HG0702430	HORVU.MOREX.r3.6HG0577610	HORVU.MOREX.r3.5HG0436740	HORVU.MOREX.r3.3HG0323670	HORVU.MOREX.r3.2HG0200860	HORVU.MOREX.r3.5HG0531460
HORVU.MOREX.r3.1HG0048910	HORVU.MOREX.r3.7HG0702450	HORVU.MOREX.r3.6HG0577620	HORVU.MOREX.r3.5HG0436810	HORVU.MOREX.r3.3HG0323730	HORVU.MOREX.r3.2HG0200920	HORVU.MOREX.r3.5HG0531470
HORVU.MOREX.r3.1HG0048920	HORVU.MOREX.r3.7HG0702490	HORVU.MOREX.r3.6HG0577650	HORVU.MOREX.r3.5HG0436820	HORVU.MOREX.r3.3HG0323750	HORVU.MOREX.r3.2HG0200970	HORVU.MOREX.r3.5HG0531490
HORVU.MOREX.r3.1HG0048930	HORVU.MOREX.r3.7HG0702500	HORVU.MOREX.r3.6HG0577670	HORVU.MOREX.r3.5HG0436840	HORVU.MOREX.r3.3HG0323760	HORVU.MOREX.r3.2HG0200980	HORVU.MOREX.r3.5HG0531500
HORVU.MOREX.r3.1HG0048940	HORVU.MOREX.r3.7HG0702510	HORVU.MOREX.r3.6HG0577760	HORVU.MOREX.r3.5HG0436850	HORVU.MOREX.r3.3HG0323770	HORVU.MOREX.r3.2HG0200990	HORVU.MOREX.r3.5HG0531510
HORVU.MOREX.r3.1HG0048990	HORVU.MOREX.r3.7HG0702520	HORVU.MOREX.r3.6HG0577780	HORVU.MOREX.r3.5HG0436870	HORVU.MOREX.r3.3HG0323800	HORVU.MOREX.r3.2HG0201030	HORVU.MOREX.r3.5HG0531520
HORVU.MOREX.r3.1HG0049000	HORVU.MOREX.r3.7HG0702530	HORVU.MOREX.r3.6HG0577830	HORVU.MOREX.r3.5HG0436880	HORVU.MOREX.r3.3HG0323810	HORVU.MOREX.r3.2HG0201070	HORVU.MOREX.r3.5HG0531540
HORVU.MOREX.r3.1HG0049040	HORVU.MOREX.r3.7HG0702540	HORVU.MOREX.r3.6HG0577860	HORVU.MOREX.r3.5HG0436890	HORVU.MOREX.r3.3HG0323820	HORVU.MOREX.r3.2HG0201080	HORVU.MOREX.r3.5HG0531550
HORVU.MOREX.r3.1HG0049050	HORVU.MOREX.r3.7HG0702610	HORVU.MOREX.r3.6HG0577920	HORVU.MOREX.r3.5HG0436900	HORVU.MOREX.r3.3HG0323860	HORVU.MOREX.r3.2HG0201100	HORVU.MOREX.r3.5HG0531560
HORVU.MOREX.r3.1HG0049060	HORVU.MOREX.r3.7HG0702620	HORVU.MOREX.r3.6HG0577940	HORVU.MOREX.r3.5HG0436910	HORVU.MOREX.r3.3HG0323880	HORVU.MOREX.r3.2HG0201110	HORVU.MOREX.r3.5HG0531570
HORVU.MOREX.r3.1HG0049110	HORVU.MOREX.r3.7HG0702630	HORVU.MOREX.r3.6HG0577950	HORVU.MOREX.r3.5HG0436920	HORVU.MOREX.r3.3HG0323890	HORVU.MOREX.r3.2HG0201120	HORVU.MOREX.r3.5HG0531580
HORVU.MOREX.r3.1HG0049130	HORVU.MOREX.r3.7HG0702660	HORVU.MOREX.r3.6HG0577990	HORVU.MOREX.r3.5HG0436950	HORVU.MOREX.r3.3HG0323910	HORVU.MOREX.r3.2HG0201150	HORVU.MOREX.r3.5HG0531640
HORVU.MOREX.r3.1HG0049140	HORVU.MOREX.r3.7HG0702670	HORVU.MOREX.r3.6HG0578020	HORVU.MOREX.r3.5HG0436960	HORVU.MOREX.r3.3HG0323920	HORVU.MOREX.r3.2HG0201180	HORVU.MOREX.r3.5HG0531660
HORVU.MOREX.r3.1HG0049150	HORVU.MOREX.r3.7HG0702770	HORVU.MOREX.r3.6HG0578050	HORVU.MOREX.r3.5HG0436970	HORVU.MOREX.r3.3HG0323930	HORVU.MOREX.r3.2HG0201190	HORVU.MOREX.r3.5HG0531680
HORVU.MOREX.r3.1HG0049170	HORVU.MOREX.r3.7HG0702790	HORVU.MOREX.r3.6HG0578070	HORVU.MOREX.r3.5HG0436990	HORVU.MOREX.r3.3HG0323940	HORVU.MOREX.r3.2HG0201200	HORVU.MOREX.r3.5HG0531690
HORVU.MOREX.r3.1HG0049180	HORVU.MOREX.r3.7HG0702800	HORVU.MOREX.r3.6HG0578170	HORVU.MOREX.r3.5HG0437090	HORVU.MOREX.r3.3HG0323970	HORVU.MOREX.r3.2HG0201220	HORVU.MOREX.r3.5HG0531710
HORVU.MOREX.r3.1HG0049190	HORVU.MOREX.r3.7HG0702830	HORVU.MOREX.r3.6HG0578180	HORVU.MOREX.r3.5HG0437110	HORVU.MOREX.r3.3HG0323980	HORVU.MOREX.r3.2HG0201230	HORVU.MOREX.r3.5HG0531720
HORVU.MOREX.r3.1HG0049200	HORVU.MOREX.r3.7HG0702840	HORVU.MOREX.r3.6HG0578200	HORVU.MOREX.r3.5HG0437130	HORVU.MOREX.r3.3HG0324020	HORVU.MOREX.r3.2HG0201250	HORVU.MOREX.r3.5HG0531750
HORVU.MOREX.r3.1HG0049220	HORVU.MOREX.r3.7HG0702850	HORVU.MOREX.r3.6HG0578240	HORVU.MOREX.r3.5HG0437170	HORVU.MOREX.r3.3HG0324070	HORVU.MOREX.r3.2HG0201260	HORVU.MOREX.r3.5HG0531770
HORVU.MOREX.r3.1HG0049250	HORVU.MOREX.r3.7HG0702990	HORVU.MOREX.r3.6HG0578310	HORVU.MOREX.r3.5HG0437230	HORVU.MOREX.r3.3HG0324080	HORVU.MOREX.r3.2HG0201270	HORVU.MOREX.r3.5HG0531820
HORVU.MOREX.r3.1HG0049270	HORVU.MOREX.r3.7HG0703000	HORVU.MOREX.r3.6HG0578430	HORVU.MOREX.r3.5HG0437260	HORVU.MOREX.r3.3HG0324100	HORVU.MOREX.r3.2HG0201330	HORVU.MOREX.r3.5HG0531830
HORVU.MOREX.r3.1HG0049340	HORVU.MOREX.r3.7HG0703080	HORVU.MOREX.r3.6HG0578460	HORVU.MOREX.r3.5HG0437300	HORVU.MOREX.r3.3HG0324120	HORVU.MOREX.r3.2HG0201340	HORVU.MOREX.r3.5HG0531840
HORVU.MOREX.r3.1HG0049370	HORVU.MOREX.r3.7HG0703110	HORVU.MOREX.r3.6HG0578500	HORVU.MOREX.r3.5HG0437380	HORVU.MOREX.r3.3HG0324130	HORVU.MOREX.r3.2HG0201350	HORVU.MOREX.r3.5HG0531850
HORVU.MOREX.r3.1HG0049390	HORVU.MOREX.r3.7HG0703120	HORVU.MOREX.r3.6HG0578510	HORVU.MOREX.r3.5HG0437400	HORVU.MOREX.r3.3HG0324140	HORVU.MOREX.r3.2HG0201360	HORVU.MOREX.r3.5HG0531860
HORVU.MOREX.r3.1HG0049400	HORVU.MOREX.r3.7HG0703140	HORVU.MOREX.r3.6HG0578520	HORVU.MOREX.r3.5HG0437410	HORVU.MOREX.r3.3HG0324150	HORVU.MOREX.r3.2HG0201390	HORVU.MOREX.r3.5HG0531870
HORVU.MOREX.r3.1HG0049410	HORVU.MOREX.r3.7HG0703150	HORVU.MOREX.r3.6HG0578550	HORVU.MOREX.r3.5HG0437440	HORVU.MOREX.r3.3HG0324160	HORVU.MOREX.r3.2HG0201400	HORVU.MOREX.r3.5HG0531900
HORVU.MOREX.r3.1HG0049430	HORVU.MOREX.r3.7HG0703160	HORVU.MOREX.r3.6HG0578570	HORVU.MOREX.r3.5HG0437480	HORVU.MOREX.r3.3HG0324180	HORVU.MOREX.r3.2HG0201420	HORVU.MOREX.r3.5HG0531920
HORVU.MOREX.r3.1HG0049440	HORVU.MOREX.r3.7HG0703170	HORVU.MOREX.r3.6HG0578580	HORVU.MOREX.r3.5HG0437490	HORVU.MOREX.r3.3HG0324200	HORVU.MOREX.r3.2HG0201440	HORVU.MOREX.r3.5HG0531930
HORVU.MOREX.r3.1HG0049450	HORVU.MOREX.r3.7HG0703190	HORVU.MOREX.r3.6HG0578610	HORVU.MOREX.r3.5HG0437500	HORVU.MOREX.r3.3HG0324240	HORVU.MOREX.r3.2HG0201480	HORVU.MOREX.r3.5HG0531940
HORVU.MOREX.r3.1HG0049460	HORVU.MOREX.r3.7HG0703200	HORVU.MOREX.r3.6HG0578630	HORVU.MOREX.r3.5HG0437530	HORVU.MOREX.r3.3HG0324260	HORVU.MOREX.r3.2HG0201490	HORVU.MOREX.r3.5HG0531960
HORVU.MOREX.r3.1HG0049480	HORVU.MOREX.r3.7HG0703220	HORVU.MOREX.r3.6HG0578660	HORVU.MOREX.r3.5HG0437540	HORVU.MOREX.r3.3HG0324270	HORVU.MOREX.r3.2HG0201500	HORVU.MOREX.r3.5HG0531990
HORVU.MOREX.r3.1HG0049570	HORVU.MOREX.r3.7HG0703260	HORVU.MOREX.r3.6HG0578670	HORVU.MOREX.r3.5HG0437550	HORVU.MOREX.r3.3HG0324290	HORVU.MOREX.r3.2HG0201510	HORVU.MOREX.r3.5HG0532040
HORVU.MOREX.r3.1HG0049580	HORVU.MOREX.r3.7HG0703270	HORVU.MOREX.r3.6HG0578690	HORVU.MOREX.r3.5HG0437580	HORVU.MOREX.r3.3HG0324310	HORVU.MOREX.r3.2HG0201520	HORVU.MOREX.r3.5HG0532050
HORVU.MOREX.r3.1HG0049590	HORVU.MOREX.r3.7HG0703280	HORVU.MOREX.r3.6HG0578720	HORVU.MOREX.r3.5HG0437600	HORVU.MOREX.r3.3HG0324320	HORVU.MOREX.r3.2HG0201540	HORVU.MOREX.r3.5HG0532090
HORVU.MOREX.r3.1HG0049600	HORVU.MOREX.r3.7HG0703310	HORVU.MOREX.r3.6HG0578730	HORVU.MOREX.r3.5HG0437610	HORVU.MOREX.r3.3HG0324330	HORVU.MOREX.r3.2HG0201580	HORVU.MOREX.r3.5HG0532100
HORVU.MOREX.r3.1HG0049610	HORVU.MOREX.r3.7HG0703320	HORVU.MOREX.r3.6HG0578740	HORVU.MOREX.r3.5HG0437620	HORVU.MOREX.r3.3HG0324340	HORVU.MOREX.r3.2HG0201590	HORVU.MOREX.r3.5HG0532120
HORVU.MOREX.r3.1HG0049620	HORVU.MOREX.r3.7HG0703340	HORVU.MOREX.r3.6HG0578800	HORVU.MOREX.r3.5HG0437630	HORVU.MOREX.r3.3HG0324350	HORVU.MOREX.r3.2HG0201610	HORVU.MOREX.r3.5HG0532140
HORVU.MOREX.r3.1HG0049650	HORVU.MOREX.r3.7HG0703350	HORVU.MOREX.r3.6HG0578820	HORVU.MOREX.r3.5HG0437670	HORVU.MOREX.r3.3HG0324410	HORVU.MOREX.r3.2HG0201630	HORVU.MOREX.r3.5HG0532150
HORVU.MOREX.r3.1HG0049700	HORVU.MOREX.r3.7HG0703370	HORVU.MOREX.r3.6HG0578860	HORVU.MOREX.r3.5HG0437690	HORVU.MOREX.r3.3HG0324450	HORVU.MOREX.r3.2HG0201640	HORVU.MOREX.r3.5HG0532170
HORVU.MOREX.r3.1HG0049760	HORVU.MOREX.r3.7HG0703400	HORVU.MOREX.r3.6HG0578870	HORVU.MOREX.r3.5HG0437700	HORVU.MOREX.r3.3HG0324480	HORVU.MOREX.r3.2HG0201650	HORVU.MOREX.r3.5HG0532180
HORVU.MOREX.r3.1HG0049770	HORVU.MOREX.r3.7HG0703410	HORVU.MOREX.r3.6HG0578880	HORVU.MOREX.r3.5HG0437710	HORVU.MOREX.r3.3HG0324600	HORVU.MOREX.r3.2HG0201690	HORVU.MOREX.r3.5HG0532190
[truncated: 3,120 more rows]
