# Supplementary material for: Transcriptomic insights into grain size development in naked barley (Hordeum vulgare L. var. nudum Hook. f): based on weighted gene co-expression network analysis
Source: PeerJ. 2025 Aug 8;13:e19856. doi: 10.7717/peerj.19856 (PMC12338054; doi:10.7717/peerj.19856)
Supplement: Supplemental Information 5 [file peerj-13-19856-s005.xlsx]

## Sheet: Sheet1
Supplementary table 5 587 differentially expressed genes (DEGs)
ID
HORVU.MOREX.r3.1HG0000420	HORVU.MOREX.r3.2HG0142030	HORVU.MOREX.r3.3HG0298390	HORVU.MOREX.r3.5HG0421110	HORVU.MOREX.r3.6HG0562490
HORVU.MOREX.r3.1HG0000460	HORVU.MOREX.r3.2HG0144990	HORVU.MOREX.r3.3HG0299050	HORVU.MOREX.r3.5HG0423130	HORVU.MOREX.r3.6HG0563940
HORVU.MOREX.r3.1HG0000480	HORVU.MOREX.r3.2HG0148520	HORVU.MOREX.r3.3HG0301820	HORVU.MOREX.r3.5HG0423810	HORVU.MOREX.r3.6HG0564660
HORVU.MOREX.r3.1HG0004310	HORVU.MOREX.r3.2HG0155790	HORVU.MOREX.r3.3HG0301980	HORVU.MOREX.r3.5HG0424060	HORVU.MOREX.r3.6HG0568860
HORVU.MOREX.r3.1HG0008810	HORVU.MOREX.r3.2HG0158120	HORVU.MOREX.r3.3HG0303000	HORVU.MOREX.r3.5HG0424150	HORVU.MOREX.r3.6HG0573040
HORVU.MOREX.r3.1HG0009450	HORVU.MOREX.r3.2HG0163240	HORVU.MOREX.r3.3HG0303160	HORVU.MOREX.r3.5HG0427690	HORVU.MOREX.r3.6HG0574290
HORVU.MOREX.r3.1HG0010640	HORVU.MOREX.r3.2HG0163250	HORVU.MOREX.r3.3HG0303220	HORVU.MOREX.r3.5HG0428820	HORVU.MOREX.r3.6HG0575740
HORVU.MOREX.r3.1HG0013270	HORVU.MOREX.r3.2HG0164090	HORVU.MOREX.r3.3HG0303680	HORVU.MOREX.r3.5HG0429390	HORVU.MOREX.r3.6HG0582550
HORVU.MOREX.r3.1HG0017620	HORVU.MOREX.r3.2HG0164340	HORVU.MOREX.r3.3HG0304390	HORVU.MOREX.r3.5HG0433170	HORVU.MOREX.r3.6HG0592430
HORVU.MOREX.r3.1HG0018800	HORVU.MOREX.r3.2HG0165060	HORVU.MOREX.r3.3HG0305520	HORVU.MOREX.r3.5HG0434930	HORVU.MOREX.r3.6HG0599070
HORVU.MOREX.r3.1HG0019100	HORVU.MOREX.r3.2HG0168690	HORVU.MOREX.r3.3HG0307420	HORVU.MOREX.r3.5HG0435440	HORVU.MOREX.r3.6HG0600000
HORVU.MOREX.r3.1HG0019340	HORVU.MOREX.r3.2HG0169040	HORVU.MOREX.r3.3HG0307850	HORVU.MOREX.r3.5HG0435530	HORVU.MOREX.r3.6HG0600460
HORVU.MOREX.r3.1HG0021960	HORVU.MOREX.r3.2HG0169130	HORVU.MOREX.r3.3HG0308770	HORVU.MOREX.r3.5HG0435740	HORVU.MOREX.r3.6HG0601090
HORVU.MOREX.r3.1HG0022730	HORVU.MOREX.r3.2HG0171740	HORVU.MOREX.r3.3HG0309890	HORVU.MOREX.r3.5HG0435760	HORVU.MOREX.r3.6HG0606680
HORVU.MOREX.r3.1HG0027090	HORVU.MOREX.r3.2HG0172300	HORVU.MOREX.r3.3HG0311440	HORVU.MOREX.r3.5HG0435960	HORVU.MOREX.r3.6HG0607560
HORVU.MOREX.r3.1HG0027120	HORVU.MOREX.r3.2HG0173440	HORVU.MOREX.r3.3HG0311650	HORVU.MOREX.r3.5HG0436000	HORVU.MOREX.r3.6HG0607810
HORVU.MOREX.r3.1HG0028440	HORVU.MOREX.r3.2HG0176030	HORVU.MOREX.r3.3HG0312250	HORVU.MOREX.r3.5HG0436050	HORVU.MOREX.r3.6HG0609530
HORVU.MOREX.r3.1HG0028450	HORVU.MOREX.r3.2HG0176250	HORVU.MOREX.r3.3HG0312690	HORVU.MOREX.r3.5HG0436090	HORVU.MOREX.r3.6HG0610830
HORVU.MOREX.r3.1HG0028570	HORVU.MOREX.r3.2HG0176940	HORVU.MOREX.r3.3HG0312880	HORVU.MOREX.r3.5HG0436250	HORVU.MOREX.r3.6HG0612760
HORVU.MOREX.r3.1HG0028790	HORVU.MOREX.r3.2HG0178930	HORVU.MOREX.r3.3HG0312910	HORVU.MOREX.r3.5HG0436340	HORVU.MOREX.r3.6HG0612920
HORVU.MOREX.r3.1HG0028850	HORVU.MOREX.r3.2HG0181020	HORVU.MOREX.r3.3HG0314250	HORVU.MOREX.r3.5HG0439510	HORVU.MOREX.r3.6HG0614670
HORVU.MOREX.r3.1HG0041380	HORVU.MOREX.r3.2HG0181160	HORVU.MOREX.r3.3HG0315580	HORVU.MOREX.r3.5HG0440870	HORVU.MOREX.r3.6HG0615860
HORVU.MOREX.r3.1HG0041560	HORVU.MOREX.r3.2HG0181510	HORVU.MOREX.r3.3HG0318420	HORVU.MOREX.r3.5HG0441580	HORVU.MOREX.r3.6HG0618080
HORVU.MOREX.r3.1HG0046190	HORVU.MOREX.r3.2HG0181700	HORVU.MOREX.r3.3HG0319530	HORVU.MOREX.r3.5HG0442020	HORVU.MOREX.r3.6HG0618950
HORVU.MOREX.r3.1HG0046400	HORVU.MOREX.r3.2HG0182430	HORVU.MOREX.r3.3HG0320040	HORVU.MOREX.r3.5HG0453670	HORVU.MOREX.r3.6HG0622520
HORVU.MOREX.r3.1HG0047100	HORVU.MOREX.r3.2HG0182810	HORVU.MOREX.r3.3HG0320240	HORVU.MOREX.r3.5HG0458480	HORVU.MOREX.r3.6HG0622760
HORVU.MOREX.r3.1HG0049040	HORVU.MOREX.r3.2HG0183550	HORVU.MOREX.r3.3HG0320360	HORVU.MOREX.r3.5HG0459580	HORVU.MOREX.r3.6HG0622770
HORVU.MOREX.r3.1HG0052720	HORVU.MOREX.r3.2HG0185880	HORVU.MOREX.r3.3HG0320900	HORVU.MOREX.r3.5HG0460120	HORVU.MOREX.r3.6HG0623640
HORVU.MOREX.r3.1HG0054710	HORVU.MOREX.r3.2HG0189750	HORVU.MOREX.r3.3HG0322070	HORVU.MOREX.r3.5HG0462190	HORVU.MOREX.r3.6HG0624530
HORVU.MOREX.r3.1HG0054940	HORVU.MOREX.r3.2HG0189930	HORVU.MOREX.r3.3HG0324410	HORVU.MOREX.r3.5HG0463010	HORVU.MOREX.r3.6HG0625190
HORVU.MOREX.r3.1HG0055640	HORVU.MOREX.r3.2HG0190500	HORVU.MOREX.r3.3HG0325540	HORVU.MOREX.r3.5HG0464410	HORVU.MOREX.r3.6HG0627410
HORVU.MOREX.r3.1HG0057490	HORVU.MOREX.r3.2HG0191620	HORVU.MOREX.r3.3HG0326310	HORVU.MOREX.r3.5HG0465310	HORVU.MOREX.r3.6HG0627420
HORVU.MOREX.r3.1HG0058690	HORVU.MOREX.r3.2HG0194770	HORVU.MOREX.r3.3HG0329490	HORVU.MOREX.r3.5HG0468580	HORVU.MOREX.r3.6HG0628410
HORVU.MOREX.r3.1HG0059470	HORVU.MOREX.r3.2HG0195460	HORVU.MOREX.r3.3HG0329570	HORVU.MOREX.r3.5HG0468590	HORVU.MOREX.r3.6HG0630650
HORVU.MOREX.r3.1HG0060220	HORVU.MOREX.r3.2HG0195490	HORVU.MOREX.r3.3HG0329950	HORVU.MOREX.r3.5HG0469140	HORVU.MOREX.r3.6HG0631420
HORVU.MOREX.r3.1HG0060360	HORVU.MOREX.r3.2HG0197000	HORVU.MOREX.r3.4HG0331550	HORVU.MOREX.r3.5HG0470900	HORVU.MOREX.r3.6HG0632030
HORVU.MOREX.r3.1HG0061770	HORVU.MOREX.r3.2HG0197010	HORVU.MOREX.r3.4HG0333250	HORVU.MOREX.r3.5HG0473570	HORVU.MOREX.r3.6HG0633070
HORVU.MOREX.r3.1HG0061780	HORVU.MOREX.r3.2HG0197610	HORVU.MOREX.r3.4HG0333410	HORVU.MOREX.r3.5HG0474050	HORVU.MOREX.r3.7HG0635200
HORVU.MOREX.r3.1HG0061790	HORVU.MOREX.r3.2HG0198320	HORVU.MOREX.r3.4HG0333470	HORVU.MOREX.r3.5HG0476490	HORVU.MOREX.r3.7HG0637810
HORVU.MOREX.r3.1HG0061800	HORVU.MOREX.r3.2HG0199560	HORVU.MOREX.r3.4HG0333480	HORVU.MOREX.r3.5HG0476560	HORVU.MOREX.r3.7HG0640140
HORVU.MOREX.r3.1HG0061820	HORVU.MOREX.r3.2HG0202440	HORVU.MOREX.r3.4HG0334550	HORVU.MOREX.r3.5HG0478330	HORVU.MOREX.r3.7HG0640270
HORVU.MOREX.r3.1HG0064570	HORVU.MOREX.r3.2HG0203350	HORVU.MOREX.r3.4HG0334850	HORVU.MOREX.r3.5HG0478700	HORVU.MOREX.r3.7HG0640320
HORVU.MOREX.r3.1HG0066370	HORVU.MOREX.r3.2HG0203800	HORVU.MOREX.r3.4HG0334970	HORVU.MOREX.r3.5HG0479000	HORVU.MOREX.r3.7HG0642220
HORVU.MOREX.r3.1HG0066680	HORVU.MOREX.r3.2HG0204250	HORVU.MOREX.r3.4HG0335250	HORVU.MOREX.r3.5HG0479050	HORVU.MOREX.r3.7HG0642740
HORVU.MOREX.r3.1HG0067140	HORVU.MOREX.r3.2HG0204260	HORVU.MOREX.r3.4HG0335450	HORVU.MOREX.r3.5HG0480600	HORVU.MOREX.r3.7HG0644480
HORVU.MOREX.r3.1HG0068660	HORVU.MOREX.r3.2HG0204520	HORVU.MOREX.r3.4HG0335650	HORVU.MOREX.r3.5HG0480960	HORVU.MOREX.r3.7HG0645780
HORVU.MOREX.r3.1HG0068950	HORVU.MOREX.r3.2HG0205890	HORVU.MOREX.r3.4HG0335790	HORVU.MOREX.r3.5HG0481320	HORVU.MOREX.r3.7HG0646210
HORVU.MOREX.r3.1HG0070830	HORVU.MOREX.r3.2HG0207080	HORVU.MOREX.r3.4HG0336940	HORVU.MOREX.r3.5HG0482430	HORVU.MOREX.r3.7HG0647190
HORVU.MOREX.r3.1HG0071540	HORVU.MOREX.r3.2HG0209020	HORVU.MOREX.r3.4HG0338360	HORVU.MOREX.r3.5HG0487140	HORVU.MOREX.r3.7HG0648730
HORVU.MOREX.r3.1HG0072060	HORVU.MOREX.r3.2HG0209220	HORVU.MOREX.r3.4HG0339950	HORVU.MOREX.r3.5HG0487300	HORVU.MOREX.r3.7HG0650550
HORVU.MOREX.r3.1HG0073650	HORVU.MOREX.r3.2HG0212610	HORVU.MOREX.r3.4HG0341030	HORVU.MOREX.r3.5HG0488450	HORVU.MOREX.r3.7HG0656620
HORVU.MOREX.r3.1HG0074250	HORVU.MOREX.r3.2HG0212630	HORVU.MOREX.r3.4HG0341070	HORVU.MOREX.r3.5HG0489910	HORVU.MOREX.r3.7HG0656700
HORVU.MOREX.r3.1HG0074440	HORVU.MOREX.r3.2HG0213430	HORVU.MOREX.r3.4HG0341450	HORVU.MOREX.r3.5HG0491100	HORVU.MOREX.r3.7HG0657600
HORVU.MOREX.r3.1HG0075510	HORVU.MOREX.r3.2HG0216340	HORVU.MOREX.r3.4HG0342540	HORVU.MOREX.r3.5HG0491120	HORVU.MOREX.r3.7HG0657830
HORVU.MOREX.r3.1HG0076260	HORVU.MOREX.r3.3HG0219210	HORVU.MOREX.r3.4HG0342860	HORVU.MOREX.r3.5HG0494900	HORVU.MOREX.r3.7HG0658900
HORVU.MOREX.r3.1HG0076400	HORVU.MOREX.r3.3HG0219250	HORVU.MOREX.r3.4HG0344540	HORVU.MOREX.r3.5HG0495360	HORVU.MOREX.r3.7HG0659410
HORVU.MOREX.r3.1HG0078590	HORVU.MOREX.r3.3HG0222380	HORVU.MOREX.r3.4HG0345470	HORVU.MOREX.r3.5HG0496620	HORVU.MOREX.r3.7HG0665140
HORVU.MOREX.r3.1HG0078800	HORVU.MOREX.r3.3HG0222560	HORVU.MOREX.r3.4HG0347390	HORVU.MOREX.r3.5HG0497260	HORVU.MOREX.r3.7HG0665730
HORVU.MOREX.r3.1HG0080000	HORVU.MOREX.r3.3HG0222570	HORVU.MOREX.r3.4HG0347570	HORVU.MOREX.r3.5HG0498130	HORVU.MOREX.r3.7HG0667150
HORVU.MOREX.r3.1HG0080020	HORVU.MOREX.r3.3HG0222830	HORVU.MOREX.r3.4HG0355410	HORVU.MOREX.r3.5HG0498300	HORVU.MOREX.r3.7HG0667820
HORVU.MOREX.r3.1HG0081110	HORVU.MOREX.r3.3HG0224440	HORVU.MOREX.r3.4HG0357420	HORVU.MOREX.r3.5HG0499020	HORVU.MOREX.r3.7HG0668320
HORVU.MOREX.r3.1HG0082060	HORVU.MOREX.r3.3HG0225510	HORVU.MOREX.r3.4HG0361660	HORVU.MOREX.r3.5HG0500190	HORVU.MOREX.r3.7HG0671320
HORVU.MOREX.r3.1HG0082810	HORVU.MOREX.r3.3HG0227850	HORVU.MOREX.r3.4HG0361950	HORVU.MOREX.r3.5HG0504260	HORVU.MOREX.r3.7HG0674260
HORVU.MOREX.r3.1HG0082860	HORVU.MOREX.r3.3HG0227920	HORVU.MOREX.r3.4HG0363600	HORVU.MOREX.r3.5HG0507390	HORVU.MOREX.r3.7HG0674330
HORVU.MOREX.r3.1HG0082960	HORVU.MOREX.r3.3HG0228520	HORVU.MOREX.r3.4HG0363640	HORVU.MOREX.r3.5HG0507410	HORVU.MOREX.r3.7HG0674600
HORVU.MOREX.r3.1HG0083520	HORVU.MOREX.r3.3HG0228860	HORVU.MOREX.r3.4HG0378600	HORVU.MOREX.r3.5HG0508640	HORVU.MOREX.r3.7HG0674690
HORVU.MOREX.r3.1HG0084120	HORVU.MOREX.r3.3HG0231180	HORVU.MOREX.r3.4HG0378780	HORVU.MOREX.r3.5HG0508840	HORVU.MOREX.r3.7HG0674710
HORVU.MOREX.r3.1HG0084890	HORVU.MOREX.r3.3HG0231360	HORVU.MOREX.r3.4HG0379300	HORVU.MOREX.r3.5HG0509120	HORVU.MOREX.r3.7HG0675240
HORVU.MOREX.r3.1HG0085740	HORVU.MOREX.r3.3HG0233990	HORVU.MOREX.r3.4HG0379530	HORVU.MOREX.r3.5HG0510220	HORVU.MOREX.r3.7HG0675420
HORVU.MOREX.r3.1HG0085810	HORVU.MOREX.r3.3HG0235010	HORVU.MOREX.r3.4HG0380150	HORVU.MOREX.r3.5HG0510640	HORVU.MOREX.r3.7HG0675510
HORVU.MOREX.r3.1HG0087590	HORVU.MOREX.r3.3HG0236540	HORVU.MOREX.r3.4HG0380970	HORVU.MOREX.r3.5HG0510780	HORVU.MOREX.r3.7HG0676010
HORVU.MOREX.r3.1HG0090010	HORVU.MOREX.r3.3HG0236660	HORVU.MOREX.r3.4HG0382640	HORVU.MOREX.r3.5HG0510820	HORVU.MOREX.r3.7HG0677170
HORVU.MOREX.r3.1HG0090320	HORVU.MOREX.r3.3HG0242350	HORVU.MOREX.r3.4HG0383630	HORVU.MOREX.r3.5HG0511090	HORVU.MOREX.r3.7HG0679840
HORVU.MOREX.r3.1HG0091080	HORVU.MOREX.r3.3HG0243250	HORVU.MOREX.r3.4HG0385530	HORVU.MOREX.r3.5HG0511660	HORVU.MOREX.r3.7HG0683350
HORVU.MOREX.r3.1HG0091150	HORVU.MOREX.r3.3HG0243310	HORVU.MOREX.r3.4HG0387610	HORVU.MOREX.r3.5HG0512630	HORVU.MOREX.r3.7HG0683900
HORVU.MOREX.r3.1HG0091430	HORVU.MOREX.r3.3HG0245420	HORVU.MOREX.r3.4HG0387640	HORVU.MOREX.r3.5HG0512640	HORVU.MOREX.r3.7HG0684150
HORVU.MOREX.r3.1HG0091620	HORVU.MOREX.r3.3HG0246210	HORVU.MOREX.r3.4HG0387650	HORVU.MOREX.r3.5HG0515370	HORVU.MOREX.r3.7HG0684880
HORVU.MOREX.r3.1HG0092280	HORVU.MOREX.r3.3HG0247650	HORVU.MOREX.r3.4HG0388250	HORVU.MOREX.r3.5HG0515900	HORVU.MOREX.r3.7HG0685280
HORVU.MOREX.r3.1HG0093220	HORVU.MOREX.r3.3HG0248140	HORVU.MOREX.r3.4HG0389310	HORVU.MOREX.r3.5HG0516830	HORVU.MOREX.r3.7HG0685970
HORVU.MOREX.r3.1HG0095170	HORVU.MOREX.r3.3HG0248290	HORVU.MOREX.r3.4HG0389440	HORVU.MOREX.r3.5HG0517490	HORVU.MOREX.r3.7HG0686880
HORVU.MOREX.r3.2HG0096500	HORVU.MOREX.r3.3HG0249180	HORVU.MOREX.r3.4HG0392620	HORVU.MOREX.r3.5HG0517630	HORVU.MOREX.r3.7HG0687790
HORVU.MOREX.r3.2HG0097350	HORVU.MOREX.r3.3HG0250020	HORVU.MOREX.r3.4HG0392670	HORVU.MOREX.r3.5HG0517950	HORVU.MOREX.r3.7HG0689920
HORVU.MOREX.r3.2HG0097360	HORVU.MOREX.r3.3HG0257070	HORVU.MOREX.r3.4HG0392880	HORVU.MOREX.r3.5HG0518330	HORVU.MOREX.r3.7HG0699630
HORVU.MOREX.r3.2HG0100690	HORVU.MOREX.r3.3HG0258640	HORVU.MOREX.r3.4HG0393690	HORVU.MOREX.r3.5HG0521630	HORVU.MOREX.r3.7HG0707080
HORVU.MOREX.r3.2HG0103630	HORVU.MOREX.r3.3HG0269930	HORVU.MOREX.r3.4HG0393950	HORVU.MOREX.r3.5HG0521970	HORVU.MOREX.r3.7HG0708040
HORVU.MOREX.r3.2HG0103940	HORVU.MOREX.r3.3HG0270430	HORVU.MOREX.r3.4HG0394680	HORVU.MOREX.r3.5HG0522160	HORVU.MOREX.r3.7HG0709970
HORVU.MOREX.r3.2HG0106830	HORVU.MOREX.r3.3HG0270500	HORVU.MOREX.r3.4HG0395710	HORVU.MOREX.r3.5HG0522480	HORVU.MOREX.r3.7HG0711550
HORVU.MOREX.r3.2HG0109700	HORVU.MOREX.r3.3HG0274110	HORVU.MOREX.r3.4HG0395940	HORVU.MOREX.r3.5HG0522820	HORVU.MOREX.r3.7HG0711910
HORVU.MOREX.r3.2HG0111270	HORVU.MOREX.r3.3HG0275350	HORVU.MOREX.r3.4HG0396570	HORVU.MOREX.r3.5HG0522870	HORVU.MOREX.r3.7HG0712010
HORVU.MOREX.r3.2HG0112560	HORVU.MOREX.r3.3HG0276710	HORVU.MOREX.r3.4HG0397530	HORVU.MOREX.r3.5HG0524850	HORVU.MOREX.r3.7HG0712580
HORVU.MOREX.r3.2HG0112610	HORVU.MOREX.r3.3HG0279110	HORVU.MOREX.r3.4HG0398090	HORVU.MOREX.r3.5HG0525790	HORVU.MOREX.r3.7HG0714160
HORVU.MOREX.r3.2HG0112840	HORVU.MOREX.r3.3HG0280980	HORVU.MOREX.r3.4HG0399610	HORVU.MOREX.r3.5HG0527840	HORVU.MOREX.r3.7HG0717870
HORVU.MOREX.r3.2HG0114430	HORVU.MOREX.r3.3HG0282510	HORVU.MOREX.r3.4HG0399840	HORVU.MOREX.r3.5HG0528540	HORVU.MOREX.r3.7HG0717950
HORVU.MOREX.r3.2HG0114450	HORVU.MOREX.r3.3HG0282640	HORVU.MOREX.r3.4HG0401440	HORVU.MOREX.r3.5HG0531900	HORVU.MOREX.r3.7HG0718870
HORVU.MOREX.r3.2HG0115850	HORVU.MOREX.r3.3HG0283230	HORVU.MOREX.r3.4HG0401630	HORVU.MOREX.r3.5HG0532460	HORVU.MOREX.r3.7HG0721400
HORVU.MOREX.r3.2HG0117410	HORVU.MOREX.r3.3HG0283640	HORVU.MOREX.r3.4HG0401690	HORVU.MOREX.r3.5HG0536540	HORVU.MOREX.r3.7HG0721830
HORVU.MOREX.r3.2HG0117660	HORVU.MOREX.r3.3HG0285170	HORVU.MOREX.r3.4HG0402940	HORVU.MOREX.r3.5HG0536790	HORVU.MOREX.r3.7HG0721840
HORVU.MOREX.r3.2HG0117830	HORVU.MOREX.r3.3HG0285320	HORVU.MOREX.r3.4HG0403120	HORVU.MOREX.r3.5HG0537640	HORVU.MOREX.r3.7HG0723240
HORVU.MOREX.r3.2HG0119760	HORVU.MOREX.r3.3HG0286190	HORVU.MOREX.r3.4HG0403400	HORVU.MOREX.r3.5HG0537650	HORVU.MOREX.r3.7HG0723280
HORVU.MOREX.r3.2HG0120360	HORVU.MOREX.r3.3HG0286390	HORVU.MOREX.r3.4HG0404560	HORVU.MOREX.r3.5HG0537660	HORVU.MOREX.r3.7HG0723340
HORVU.MOREX.r3.2HG0120710	HORVU.MOREX.r3.3HG0286520	HORVU.MOREX.r3.4HG0405990	HORVU.MOREX.r3.5HG0537670	HORVU.MOREX.r3.7HG0727040
HORVU.MOREX.r3.2HG0122530	HORVU.MOREX.r3.3HG0287610	HORVU.MOREX.r3.4HG0406150	HORVU.MOREX.r3.6HG0538280	HORVU.MOREX.r3.7HG0728340
HORVU.MOREX.r3.2HG0125650	HORVU.MOREX.r3.3HG0288030	HORVU.MOREX.r3.4HG0406790	HORVU.MOREX.r3.6HG0538290	HORVU.MOREX.r3.7HG0728980
HORVU.MOREX.r3.2HG0125840	HORVU.MOREX.r3.3HG0288270	HORVU.MOREX.r3.4HG0409380	HORVU.MOREX.r3.6HG0538470	HORVU.MOREX.r3.7HG0730320
HORVU.MOREX.r3.2HG0126550	HORVU.MOREX.r3.3HG0288690	HORVU.MOREX.r3.4HG0409470	HORVU.MOREX.r3.6HG0538650	HORVU.MOREX.r3.7HG0735250
HORVU.MOREX.r3.2HG0126660	HORVU.MOREX.r3.3HG0288810	HORVU.MOREX.r3.4HG0409870	HORVU.MOREX.r3.6HG0540420	HORVU.MOREX.r3.7HG0736260
HORVU.MOREX.r3.2HG0127360	HORVU.MOREX.r3.3HG0288960	HORVU.MOREX.r3.4HG0410290	HORVU.MOREX.r3.6HG0540530	HORVU.MOREX.r3.7HG0736870
HORVU.MOREX.r3.2HG0131510	HORVU.MOREX.r3.3HG0289810	HORVU.MOREX.r3.4HG0410300	HORVU.MOREX.r3.6HG0542700	HORVU.MOREX.r3.7HG0737140
HORVU.MOREX.r3.2HG0134940	HORVU.MOREX.r3.3HG0291400	HORVU.MOREX.r3.4HG0410690	HORVU.MOREX.r3.6HG0543150	HORVU.MOREX.r3.7HG0738140
HORVU.MOREX.r3.2HG0138320	HORVU.MOREX.r3.3HG0292600	HORVU.MOREX.r3.4HG0412150	HORVU.MOREX.r3.6HG0546770	HORVU.MOREX.r3.7HG0742480
HORVU.MOREX.r3.2HG0138340	HORVU.MOREX.r3.3HG0292790	HORVU.MOREX.r3.4HG0415510	HORVU.MOREX.r3.6HG0548110	HORVU.MOREX.r3.7HG0742500
HORVU.MOREX.r3.2HG0139380	HORVU.MOREX.r3.3HG0294930	HORVU.MOREX.r3.4HG0416240	HORVU.MOREX.r3.6HG0554840	HORVU.MOREX.r3.7HG0743420
HORVU.MOREX.r3.2HG0140970	HORVU.MOREX.r3.3HG0296120	HORVU.MOREX.r3.4HG0417260	HORVU.MOREX.r3.6HG0555880	HORVU.MOREX.r3.7HG0745790
HORVU.MOREX.r3.2HG0141190	HORVU.MOREX.r3.3HG0296510	HORVU.MOREX.r3.4HG0417310	HORVU.MOREX.r3.6HG0557570	HORVU.MOREX.r3.7HG0747690
HORVU.MOREX.r3.2HG0141230	HORVU.MOREX.r3.3HG0297880	HORVU.MOREX.r3.4HG0417910	HORVU.MOREX.r3.6HG0558970	HORVU.MOREX.r3.7HG0749950
HORVU.MOREX.r3.7HG0751750	HORVU.MOREX.r3.3HG0298030	HORVU.MOREX.r3.4HG0418350	HORVU.MOREX.r3.6HG0562080	HORVU.MOREX.r3.7HG0751260
HORVU.MOREX.r3.UnG0753820	HORVU.MOREX.r3.3HG0298280	HORVU.MOREX.r3.4HG0418520	HORVU.MOREX.r3.6HG0562150	HORVU.MOREX.r3.7HG0751670
			HORVU.MOREX.r3.5HG0420850	HORVU.MOREX.r3.7HG0751740
