# Supplementary material for: Transcriptomic insights into grain size development in naked barley (Hordeum vulgare L. var. nudum Hook. f): based on weighted gene co-expression network analysis
Source: PeerJ. 2025 Aug 8;13:e19856. doi: 10.7717/peerj.19856 (PMC12338054; doi:10.7717/peerj.19856)
Supplement: Supplemental Information 6 [file peerj-13-19856-s006.xlsx]

## Sheet: Sheet1
Supplementary table 6 GO enrichment analysis
Number	GO ID	Term Type	Description	Ratio_in_study	Ratio_in_pop	Rich factor	Pvalue	Padjust	Gene_ids	Gene_names
36	GO:0005576	CC	extracellular region	36/ 445	805/ 29474	0.04472049689441	8.5056049290004E-9	6.5667291235121E-6	HORVU.MOREX.r3.1HG0017620;HORVU.MOREX.r3.1HG0066680;HORVU.MOREX.r3.1HG0067140;HORVU.MOREX.r3.2HG0097360;HORVU.MOREX.r3.2HG0112560;HORVU.MOREX.r3.2HG0112610;HORVU.MOREX.r3.2HG0120360;HORVU.MOREX.r3.2HG0138340;HORVU.MOREX.r3.2HG0194770;HORVU.MOREX.r3.2HG0207080;HORVU.MOREX.r3.3HG0222380;HORVU.MOREX.r3.3HG0222560;HORVU.MOREX.r3.3HG0222570;HORVU.MOREX.r3.3HG0233990;HORVU.MOREX.r3.3HG0250020;HORVU.MOR…	LemThio1
22	GO:1901700	BP	response to oxygen-containing compound	22/ 445	315/ 29474	0.06984126984127	3.4326554283791E-9	1.6102586614526E-5	HORVU.MOREX.r3.1HG0049040;HORVU.MOREX.r3.1HG0061770;HORVU.MOREX.r3.1HG0061780;HORVU.MOREX.r3.1HG0061790;HORVU.MOREX.r3.1HG0061800;HORVU.MOREX.r3.1HG0061820;HORVU.MOREX.r3.2HG0140970;HORVU.MOREX.r3.2HG0176250;HORVU.MOREX.r3.3HG0246210;HORVU.MOREX.r3.3HG0248140;HORVU.MOREX.r3.3HG0283230;HORVU.MOREX.r3.3HG0288960;HORVU.MOREX.r3.4HG0339950;HORVU.MOREX.r3.4HG0347570;HORVU.MOREX.r3.5HG0478330;HORVU.MOR…	Dhn6Dhn1DHN4
12	GO:0009737	BP	response to abscisic acid	12/ 445	98/ 29474	0.12244897959184	3.0465793108707E-8	5.3477346371118E-5	HORVU.MOREX.r3.1HG0049040;HORVU.MOREX.r3.1HG0061770;HORVU.MOREX.r3.1HG0061780;HORVU.MOREX.r3.1HG0061790;HORVU.MOREX.r3.1HG0061800;HORVU.MOREX.r3.1HG0061820;HORVU.MOREX.r3.3HG0246210;HORVU.MOREX.r3.5HG0478330;HORVU.MOREX.r3.5HG0507390;HORVU.MOREX.r3.6HG0548110;HORVU.MOREX.r3.6HG0622760;HORVU.MOREX.r3.7HG0674710	DHN4
12	GO:0097305	BP	response to alcohol	12/ 445	99/ 29474	0.12121212121212	3.4199965703124E-8	5.3477346371118E-5	HORVU.MOREX.r3.1HG0049040;HORVU.MOREX.r3.1HG0061770;HORVU.MOREX.r3.1HG0061780;HORVU.MOREX.r3.1HG0061790;HORVU.MOREX.r3.1HG0061800;HORVU.MOREX.r3.1HG0061820;HORVU.MOREX.r3.3HG0246210;HORVU.MOREX.r3.5HG0478330;HORVU.MOREX.r3.5HG0507390;HORVU.MOREX.r3.6HG0548110;HORVU.MOREX.r3.6HG0622760;HORVU.MOREX.r3.7HG0674710	DHN4
10	GO:0009415	BP	response to water	10/ 445	84/ 29474	0.11904761904762	5.673529103185E-7	0.0004443989656368	HORVU.MOREX.r3.3HG0248140;HORVU.MOREX.r3.3HG0283230;HORVU.MOREX.r3.3HG0288960;HORVU.MOREX.r3.4HG0339950;HORVU.MOREX.r3.5HG0507390;HORVU.MOREX.r3.5HG0507410;HORVU.MOREX.r3.5HG0516830;HORVU.MOREX.r3.6HG0548110;HORVU.MOREX.r3.6HG0622760;HORVU.MOREX.r3.6HG0622770	Dhn6Dhn1DHN4
10	GO:0001101	BP	response to acid chemical	10/ 445	85/ 29474	0.11764705882353	6.3442812958205E-7	0.0004443989656368	HORVU.MOREX.r3.3HG0248140;HORVU.MOREX.r3.3HG0283230;HORVU.MOREX.r3.3HG0288960;HORVU.MOREX.r3.4HG0339950;HORVU.MOREX.r3.5HG0507390;HORVU.MOREX.r3.5HG0507410;HORVU.MOREX.r3.5HG0516830;HORVU.MOREX.r3.6HG0548110;HORVU.MOREX.r3.6HG0622760;HORVU.MOREX.r3.6HG0622770	Dhn6Dhn1DHN4
12	GO:0033993	BP	response to lipid	12/ 445	134/ 29474	0.08955223880597	9.6928783085677E-7	0.0005683661518186	HORVU.MOREX.r3.1HG0049040;HORVU.MOREX.r3.1HG0061770;HORVU.MOREX.r3.1HG0061780;HORVU.MOREX.r3.1HG0061790;HORVU.MOREX.r3.1HG0061800;HORVU.MOREX.r3.1HG0061820;HORVU.MOREX.r3.3HG0246210;HORVU.MOREX.r3.5HG0478330;HORVU.MOREX.r3.5HG0507390;HORVU.MOREX.r3.6HG0548110;HORVU.MOREX.r3.6HG0622760;HORVU.MOREX.r3.7HG0674710	DHN4
5	GO:0001906	BP	cell killing	5/ 445	14/ 29474	0.35714285714286	1.3726219586155E-6	0.0005975588689337	HORVU.MOREX.r3.5HG0423130;HORVU.MOREX.r3.5HG0525790;HORVU.MOREX.r3.7HG0685280;HORVU.MOREX.r3.7HG0751740;HORVU.MOREX.r3.7HG0751750
5	GO:0031640	BP	killing of cells of another organism	5/ 445	14/ 29474	0.35714285714286	1.3726219586155E-6	0.0005975588689337	HORVU.MOREX.r3.5HG0423130;HORVU.MOREX.r3.5HG0525790;HORVU.MOREX.r3.7HG0685280;HORVU.MOREX.r3.7HG0751740;HORVU.MOREX.r3.7HG0751750
10	GO:0050832	BP	defense response to fungus	10/ 445	100/ 29474	0.1	2.8701450161349E-6	0.0010540257907969	HORVU.MOREX.r3.2HG0138340;HORVU.MOREX.r3.3HG0288960;HORVU.MOREX.r3.3HG0326310;HORVU.MOREX.r3.4HG0335650;HORVU.MOREX.r3.5HG0423130;HORVU.MOREX.r3.5HG0525790;HORVU.MOREX.r3.6HG0632030;HORVU.MOREX.r3.7HG0685280;HORVU.MOREX.r3.7HG0751740;HORVU.MOREX.r3.7HG0751750
5	GO:0019915	BP	lipid storage	5/ 445	16/ 29474	0.3125	2.9209838585291E-6	0.0010540257907969	HORVU.MOREX.r3.1HG0091150;HORVU.MOREX.r3.4HG0355410;HORVU.MOREX.r3.5HG0473570;HORVU.MOREX.r3.6HG0554840;HORVU.MOREX.r3.7HG0677170
10	GO:0009620	BP	response to fungus	10/ 445	105/ 29474	0.095238095238095	4.4733613638505E-6	0.0014988955827016	HORVU.MOREX.r3.2HG0138340;HORVU.MOREX.r3.3HG0288960;HORVU.MOREX.r3.3HG0326310;HORVU.MOREX.r3.4HG0335650;HORVU.MOREX.r3.5HG0423130;HORVU.MOREX.r3.5HG0525790;HORVU.MOREX.r3.6HG0632030;HORVU.MOREX.r3.7HG0685280;HORVU.MOREX.r3.7HG0751740;HORVU.MOREX.r3.7HG0751750
13	GO:0010035	BP	response to inorganic substance	13/ 445	191/ 29474	0.068062827225131	7.4594838218903E-6	0.0021870274130304	HORVU.MOREX.r3.2HG0140970;HORVU.MOREX.r3.2HG0176250;HORVU.MOREX.r3.3HG0248140;HORVU.MOREX.r3.3HG0283230;HORVU.MOREX.r3.3HG0288960;HORVU.MOREX.r3.3HG0303160;HORVU.MOREX.r3.4HG0339950;HORVU.MOREX.r3.5HG0507390;HORVU.MOREX.r3.5HG0507410;HORVU.MOREX.r3.5HG0516830;HORVU.MOREX.r3.6HG0548110;HORVU.MOREX.r3.6HG0622760;HORVU.MOREX.r3.6HG0622770	Dhn6Dhn1DHN4
28	GO:0042221	BP	response to chemical	28/ 445	734/ 29474	0.038147138964578	8.4900295441599E-6	0.0023427487406855	HORVU.MOREX.r3.1HG0049040;HORVU.MOREX.r3.1HG0061770;HORVU.MOREX.r3.1HG0061780;HORVU.MOREX.r3.1HG0061790;HORVU.MOREX.r3.1HG0061800;HORVU.MOREX.r3.1HG0061820;HORVU.MOREX.r3.1HG0066370;HORVU.MOREX.r3.2HG0140970;HORVU.MOREX.r3.2HG0176250;HORVU.MOREX.r3.3HG0246210;HORVU.MOREX.r3.3HG0248140;HORVU.MOREX.r3.3HG0283230;HORVU.MOREX.r3.3HG0288960;HORVU.MOREX.r3.3HG0303160;HORVU.MOREX.r3.4HG0339950;HORVU.MOR…	Dhn6Dhn1DHN4
4	GO:0043457	BP	regulation of cellular respiration	4/ 445	10/ 29474	0.4	1.0017860463077E-5	0.0026107657462386	HORVU.MOREX.r3.1HG0028450;HORVU.MOREX.r3.5HG0434930;HORVU.MOREX.r3.5HG0435960;HORVU.MOREX.r3.7HG0683350
6	GO:0051235	BP	maintenance of location	6/ 445	37/ 29474	0.16216216216216	1.7908189539891E-5	0.0044214377437698	HORVU.MOREX.r3.1HG0091150;HORVU.MOREX.r3.4HG0355410;HORVU.MOREX.r3.4HG0393950;HORVU.MOREX.r3.5HG0473570;HORVU.MOREX.r3.6HG0554840;HORVU.MOREX.r3.7HG0677170
24	GO:0016798	MF	hydrolase activity, acting on glycosyl bonds	24/ 445	613/ 29474	0.039151712887439	2.4716334205522E-5	0.0090978356510799	HORVU.MOREX.r3.1HG0059470;HORVU.MOREX.r3.1HG0060360;HORVU.MOREX.r3.1HG0074440;HORVU.MOREX.r3.2HG0117660;HORVU.MOREX.r3.2HG0138320;HORVU.MOREX.r3.2HG0138340;HORVU.MOREX.r3.2HG0181510;HORVU.MOREX.r3.2HG0205890;HORVU.MOREX.r3.2HG0209220;HORVU.MOREX.r3.2HG0216340;HORVU.MOREX.r3.3HG0233990;HORVU.MOREX.r3.3HG0312880;HORVU.MOREX.r3.3HG0319530;HORVU.MOREX.r3.4HG0412150;HORVU.MOREX.r3.4HG0417260;HORVU.MOR…	beta-glucosidaselimit dextrinase
8	GO:0008422	MF	beta-glucosidase activity	8/ 445	81/ 29474	0.098765432098765	3.1129815604416E-5	0.0090978356510799	HORVU.MOREX.r3.1HG0060360;HORVU.MOREX.r3.2HG0117660;HORVU.MOREX.r3.2HG0181510;HORVU.MOREX.r3.2HG0205890;HORVU.MOREX.r3.3HG0312880;HORVU.MOREX.r3.3HG0319530;HORVU.MOREX.r3.5HG0495360;HORVU.MOREX.r3.5HG0510640	beta-glucosidase
5	GO:0102726	MF	DIMBOA glucoside beta-D-glucosidase activity	5/ 445	25/ 29474	0.2	3.1761257121691E-5	0.0090978356510799	HORVU.MOREX.r3.2HG0117660;HORVU.MOREX.r3.2HG0181510;HORVU.MOREX.r3.2HG0205890;HORVU.MOREX.r3.3HG0312880;HORVU.MOREX.r3.5HG0495360	beta-glucosidase
37	GO:0005975	BP	carbohydrate metabolic process	37/ 445	1187/ 29474	0.03117101937658	4.2373899216416E-5	0.0095955074067472	HORVU.MOREX.r3.1HG0047100;HORVU.MOREX.r3.1HG0052720;HORVU.MOREX.r3.1HG0059470;HORVU.MOREX.r3.1HG0060360;HORVU.MOREX.r3.1HG0095170;HORVU.MOREX.r3.2HG0117660;HORVU.MOREX.r3.2HG0138320;HORVU.MOREX.r3.2HG0138340;HORVU.MOREX.r3.2HG0139380;HORVU.MOREX.r3.2HG0176940;HORVU.MOREX.r3.2HG0181510;HORVU.MOREX.r3.2HG0197610;HORVU.MOREX.r3.2HG0205890;HORVU.MOREX.r3.2HG0209220;HORVU.MOREX.r3.3HG0233990;HORVU.MOR…	beta-glucosidasestarch synthase IIIblimit dextrinase
15	GO:0016052	BP	carbohydrate catabolic process	15/ 445	301/ 29474	0.049833887043189	6.1119354466046E-5	0.012465690947836	HORVU.MOREX.r3.2HG0138320;HORVU.MOREX.r3.2HG0138340;HORVU.MOREX.r3.3HG0236660;HORVU.MOREX.r3.3HG0287610;HORVU.MOREX.r3.3HG0303220;HORVU.MOREX.r3.3HG0307850;HORVU.MOREX.r3.4HG0379300;HORVU.MOREX.r3.4HG0412150;HORVU.MOREX.r3.4HG0417260;HORVU.MOREX.r3.5HG0510640;HORVU.MOREX.r3.7HG0647190;HORVU.MOREX.r3.7HG0656620;HORVU.MOREX.r3.7HG0717870;HORVU.MOREX.r3.7HG0751740;HORVU.MOREX.r3.7HG0751750	limit dextrinase
8	GO:0004867	MF	serine-type endopeptidase inhibitor activity	8/ 445	99/ 29474	0.080808080808081	0.0001308794132664	0.033740712740101	HORVU.MOREX.r3.1HG0004310;HORVU.MOREX.r3.1HG0066680;HORVU.MOREX.r3.1HG0067140;HORVU.MOREX.r3.2HG0122530;HORVU.MOREX.r3.3HG0222380;HORVU.MOREX.r3.3HG0222560;HORVU.MOREX.r3.3HG0222570;HORVU.MOREX.r3.5HG0524850
2	GO:0006097	BP	glyoxylate cycle	2/ 445	2/ 29474	1	0.0002274466569152	0.036300228412594	HORVU.MOREX.r3.2HG0139380;HORVU.MOREX.r3.2HG0176940
75	GO:0050896	BP	response to stimulus	75/ 445	3274/ 29474	0.022907758094075	0.0002444196996436	0.036300228412594	HORVU.MOREX.r3.1HG0004310;HORVU.MOREX.r3.1HG0017620;HORVU.MOREX.r3.1HG0049040;HORVU.MOREX.r3.1HG0060220;HORVU.MOREX.r3.1HG0061770;HORVU.MOREX.r3.1HG0061780;HORVU.MOREX.r3.1HG0061790;HORVU.MOREX.r3.1HG0061800;HORVU.MOREX.r3.1HG0061820;HORVU.MOREX.r3.1HG0066370;HORVU.MOREX.r3.1HG0074440;HORVU.MOREX.r3.1HG0076260;HORVU.MOREX.r3.1HG0078590;HORVU.MOREX.r3.1HG0091620;HORVU.MOREX.r3.2HG0112560;HORVU.MOR…	poly(ADP-ribose) polymeraseDhn6HTH3Dhn1LemThio1DHN4
4	GO:0035821	BP	modulation of process of another organism	4/ 445	21/ 29474	0.19047619047619	0.0002502605247567	0.036300228412594	HORVU.MOREX.r3.5HG0525790;HORVU.MOREX.r3.6HG0538280;HORVU.MOREX.r3.6HG0538290;HORVU.MOREX.r3.7HG0685280	LemThio1
4	GO:0043467	BP	regulation of generation of precursor metabolites and energy	4/ 445	21/ 29474	0.19047619047619	0.0002502605247567	0.036300228412594	HORVU.MOREX.r3.1HG0028450;HORVU.MOREX.r3.5HG0434930;HORVU.MOREX.r3.5HG0435960;HORVU.MOREX.r3.7HG0683350
5	GO:0016998	BP	cell wall macromolecule catabolic process	5/ 445	38/ 29474	0.13157894736842	0.0002553629370316	0.036300228412594	HORVU.MOREX.r3.2HG0138320;HORVU.MOREX.r3.2HG0138340;HORVU.MOREX.r3.3HG0307850;HORVU.MOREX.r3.7HG0751740;HORVU.MOREX.r3.7HG0751750
8	GO:0015926	MF	glucosidase activity	8/ 445	102/ 29474	0.07843137254902	0.0001611954634361	0.037216798089986	HORVU.MOREX.r3.1HG0060360;HORVU.MOREX.r3.2HG0117660;HORVU.MOREX.r3.2HG0181510;HORVU.MOREX.r3.2HG0205890;HORVU.MOREX.r3.3HG0312880;HORVU.MOREX.r3.3HG0319530;HORVU.MOREX.r3.5HG0495360;HORVU.MOREX.r3.5HG0510640	beta-glucosidase
14	GO:0009725	BP	response to hormone	14/ 445	317/ 29474	0.04416403785489	0.0003688382365559	0.043866687024715	HORVU.MOREX.r3.1HG0049040;HORVU.MOREX.r3.1HG0061770;HORVU.MOREX.r3.1HG0061780;HORVU.MOREX.r3.1HG0061790;HORVU.MOREX.r3.1HG0061800;HORVU.MOREX.r3.1HG0061820;HORVU.MOREX.r3.3HG0246210;HORVU.MOREX.r3.5HG0478330;HORVU.MOREX.r3.5HG0507390;HORVU.MOREX.r3.5HG0509120;HORVU.MOREX.r3.6HG0548110;HORVU.MOREX.r3.6HG0610830;HORVU.MOREX.r3.6HG0622760;HORVU.MOREX.r3.7HG0674710	DHN4
3	GO:0010951	BP	negative regulation of endopeptidase activity	3/ 445	10/ 29474	0.3	0.0003790894621284	0.043866687024715	HORVU.MOREX.r3.1HG0066680;HORVU.MOREX.r3.3HG0222380;HORVU.MOREX.r3.3HG0222570
3	GO:0052548	BP	regulation of endopeptidase activity	3/ 445	10/ 29474	0.3	0.0003790894621284	0.043866687024715	HORVU.MOREX.r3.1HG0066680;HORVU.MOREX.r3.3HG0222380;HORVU.MOREX.r3.3HG0222570
10	GO:0000272	BP	polysaccharide catabolic process	10/ 445	177/ 29474	0.056497175141243	0.0003810929496725	0.043866687024715	HORVU.MOREX.r3.2HG0138320;HORVU.MOREX.r3.2HG0138340;HORVU.MOREX.r3.3HG0303220;HORVU.MOREX.r3.3HG0307850;HORVU.MOREX.r3.4HG0412150;HORVU.MOREX.r3.4HG0417260;HORVU.MOREX.r3.5HG0510640;HORVU.MOREX.r3.7HG0656620;HORVU.MOREX.r3.7HG0751740;HORVU.MOREX.r3.7HG0751750	limit dextrinase
8	GO:0009790	BP	embryo development	8/ 445	116/ 29474	0.068965517241379	0.0003889545453237	0.043866687024715	HORVU.MOREX.r3.2HG0197000;HORVU.MOREX.r3.2HG0197010;HORVU.MOREX.r3.5HG0470900;HORVU.MOREX.r3.5HG0527840;HORVU.MOREX.r3.6HG0592430;HORVU.MOREX.r3.7HG0637810;HORVU.MOREX.r3.7HG0675510;HORVU.MOREX.r3.7HG0735250
8	GO:0009793	BP	embryo development ending in seed dormancy	8/ 445	116/ 29474	0.068965517241379	0.0003889545453237	0.043866687024715	HORVU.MOREX.r3.2HG0197000;HORVU.MOREX.r3.2HG0197010;HORVU.MOREX.r3.5HG0470900;HORVU.MOREX.r3.5HG0527840;HORVU.MOREX.r3.6HG0592430;HORVU.MOREX.r3.7HG0637810;HORVU.MOREX.r3.7HG0675510;HORVU.MOREX.r3.7HG0735250
14	GO:0009719	BP	response to endogenous stimulus	14/ 445	319/ 29474	0.043887147335423	0.0003927522607201	0.043866687024715	HORVU.MOREX.r3.1HG0049040;HORVU.MOREX.r3.1HG0061770;HORVU.MOREX.r3.1HG0061780;HORVU.MOREX.r3.1HG0061790;HORVU.MOREX.r3.1HG0061800;HORVU.MOREX.r3.1HG0061820;HORVU.MOREX.r3.3HG0246210;HORVU.MOREX.r3.5HG0478330;HORVU.MOREX.r3.5HG0507390;HORVU.MOREX.r3.5HG0509120;HORVU.MOREX.r3.6HG0548110;HORVU.MOREX.r3.6HG0610830;HORVU.MOREX.r3.6HG0622760;HORVU.MOREX.r3.7HG0674710	DHN4
5	GO:0052547	BP	regulation of peptidase activity	5/ 445	45/ 29474	0.11111111111111	0.0005700419976917	0.058409490727468	HORVU.MOREX.r3.1HG0004310;HORVU.MOREX.r3.1HG0066680;HORVU.MOREX.r3.3HG0222380;HORVU.MOREX.r3.3HG0222570;HORVU.MOREX.r3.5HG0524850
5	GO:0010466	BP	negative regulation of peptidase activity	5/ 445	45/ 29474	0.11111111111111	0.0005700419976917	0.058409490727468	HORVU.MOREX.r3.1HG0004310;HORVU.MOREX.r3.1HG0066680;HORVU.MOREX.r3.3HG0222380;HORVU.MOREX.r3.3HG0222570;HORVU.MOREX.r3.5HG0524850
8	GO:0051248	BP	negative regulation of protein metabolic process	8/ 445	123/ 29474	0.065040650406504	0.0005755452868453	0.058409490727468	HORVU.MOREX.r3.1HG0004310;HORVU.MOREX.r3.1HG0066680;HORVU.MOREX.r3.2HG0216340;HORVU.MOREX.r3.3HG0222380;HORVU.MOREX.r3.3HG0222570;HORVU.MOREX.r3.5HG0524850;HORVU.MOREX.r3.5HG0525790;HORVU.MOREX.r3.7HG0685280
17	GO:0010033	BP	response to organic substance	17/ 445	452/ 29474	0.037610619469027	0.000582819220614	0.058409490727468	HORVU.MOREX.r3.1HG0049040;HORVU.MOREX.r3.1HG0061770;HORVU.MOREX.r3.1HG0061780;HORVU.MOREX.r3.1HG0061790;HORVU.MOREX.r3.1HG0061800;HORVU.MOREX.r3.1HG0061820;HORVU.MOREX.r3.2HG0176250;HORVU.MOREX.r3.3HG0246210;HORVU.MOREX.r3.4HG0347570;HORVU.MOREX.r3.4HG0387610;HORVU.MOREX.r3.5HG0478330;HORVU.MOREX.r3.5HG0507390;HORVU.MOREX.r3.5HG0509120;HORVU.MOREX.r3.6HG0548110;HORVU.MOREX.r3.6HG0610830;HORVU.MOR…	DHN4
5	GO:0045861	BP	negative regulation of proteolysis	5/ 445	46/ 29474	0.10869565217391	0.0006317130874666	0.061622191659168	HORVU.MOREX.r3.1HG0004310;HORVU.MOREX.r3.1HG0066680;HORVU.MOREX.r3.3HG0222380;HORVU.MOREX.r3.3HG0222570;HORVU.MOREX.r3.5HG0524850
2	GO:0008898	MF	S-adenosylmethionine-homocysteine S-methyltransferase activity	2/ 445	3/ 29474	0.66666666666667	0.0006755023710571	0.082925957742156	HORVU.MOREX.r3.3HG0292600;HORVU.MOREX.r3.4HG0395940
5	GO:0051346	BP	negative regulation of hydrolase activity	5/ 445	51/ 29474	0.098039215686275	0.0010178417154005	0.088420286795261	HORVU.MOREX.r3.1HG0004310;HORVU.MOREX.r3.1HG0066680;HORVU.MOREX.r3.3HG0222380;HORVU.MOREX.r3.3HG0222570;HORVU.MOREX.r3.5HG0524850
3	GO:0006833	BP	water transport	3/ 445	14/ 29474	0.21428571428571	0.0010993472289494	0.09208996162503	HORVU.MOREX.r3.1HG0046190;HORVU.MOREX.r3.2HG0183550;HORVU.MOREX.r3.3HG0249180	HvTIP32
3	GO:0042044	BP	fluid transport	3/ 445	14/ 29474	0.21428571428571	0.0010993472289494	0.09208996162503	HORVU.MOREX.r3.1HG0046190;HORVU.MOREX.r3.2HG0183550;HORVU.MOREX.r3.3HG0249180	HvTIP32
19	GO:0004553	MF	hydrolase activity, hydrolyzing O-glycosyl compounds	19/ 445	528/ 29474	0.035984848484848	0.0007882079360974	0.092363639057239	HORVU.MOREX.r3.1HG0059470;HORVU.MOREX.r3.1HG0060360;HORVU.MOREX.r3.2HG0117660;HORVU.MOREX.r3.2HG0138340;HORVU.MOREX.r3.2HG0181510;HORVU.MOREX.r3.2HG0205890;HORVU.MOREX.r3.2HG0209220;HORVU.MOREX.r3.3HG0233990;HORVU.MOREX.r3.3HG0312880;HORVU.MOREX.r3.3HG0319530;HORVU.MOREX.r3.4HG0412150;HORVU.MOREX.r3.4HG0417260;HORVU.MOREX.r3.5HG0495360;HORVU.MOREX.r3.5HG0510640;HORVU.MOREX.r3.5HG0522870;HORVU.MOR…	beta-glucosidaselimit dextrinase
8	GO:0030414	MF	peptidase inhibitor activity	8/ 445	133/ 29474	0.06015037593985	0.000961335879451	0.095320149893257	HORVU.MOREX.r3.1HG0004310;HORVU.MOREX.r3.1HG0066680;HORVU.MOREX.r3.1HG0067140;HORVU.MOREX.r3.2HG0122530;HORVU.MOREX.r3.3HG0222380;HORVU.MOREX.r3.3HG0222560;HORVU.MOREX.r3.3HG0222570;HORVU.MOREX.r3.5HG0524850
8	GO:0004866	MF	endopeptidase inhibitor activity	8/ 445	133/ 29474	0.06015037593985	0.000961335879451	0.095320149893257	HORVU.MOREX.r3.1HG0004310;HORVU.MOREX.r3.1HG0066680;HORVU.MOREX.r3.1HG0067140;HORVU.MOREX.r3.2HG0122530;HORVU.MOREX.r3.3HG0222380;HORVU.MOREX.r3.3HG0222560;HORVU.MOREX.r3.3HG0222570;HORVU.MOREX.r3.5HG0524850
8	GO:0061135	MF	endopeptidase regulator activity	8/ 445	134/ 29474	0.059701492537313	0.0010091693493865	0.096356984545126	HORVU.MOREX.r3.1HG0004310;HORVU.MOREX.r3.1HG0066680;HORVU.MOREX.r3.1HG0067140;HORVU.MOREX.r3.2HG0122530;HORVU.MOREX.r3.3HG0222380;HORVU.MOREX.r3.3HG0222560;HORVU.MOREX.r3.3HG0222570;HORVU.MOREX.r3.5HG0524850
8	GO:0061134	MF	peptidase regulator activity	8/ 445	136/ 29474	0.058823529411765	0.0011105437585476	0.10224935034057	HORVU.MOREX.r3.1HG0004310;HORVU.MOREX.r3.1HG0066680;HORVU.MOREX.r3.1HG0067140;HORVU.MOREX.r3.2HG0122530;HORVU.MOREX.r3.3HG0222380;HORVU.MOREX.r3.3HG0222560;HORVU.MOREX.r3.3HG0222570;HORVU.MOREX.r3.5HG0524850
51	GO:0016491	MF	oxidoreductase activity	51/ 445	2141/ 29474	0.023820644558617	0.0012060702826985	0.10721548926886	HORVU.MOREX.r3.1HG0017620;HORVU.MOREX.r3.1HG0018800;HORVU.MOREX.r3.1HG0021960;HORVU.MOREX.r3.1HG0071540;HORVU.MOREX.r3.1HG0082960;HORVU.MOREX.r3.2HG0097360;HORVU.MOREX.r3.2HG0103940;HORVU.MOREX.r3.2HG0112560;HORVU.MOREX.r3.2HG0112610;HORVU.MOREX.r3.2HG0120360;HORVU.MOREX.r3.2HG0120710;HORVU.MOREX.r3.2HG0142030;HORVU.MOREX.r3.2HG0163240;HORVU.MOREX.r3.2HG0163250;HORVU.MOREX.r3.2HG0171740;HORVU.MOR…	ADH4
2	GO:0046487	BP	glyoxylate metabolic process	2/ 445	4/ 29474	0.5	0.0013374833661086	0.10817473224855	HORVU.MOREX.r3.2HG0139380;HORVU.MOREX.r3.2HG0176940
2	GO:0004067	MF	asparaginase activity	2/ 445	4/ 29474	0.5	0.0013374833661086	0.1149344039276	HORVU.MOREX.r3.2HG0204250;HORVU.MOREX.r3.2HG0204260
5	GO:0016701	MF	oxidoreductase activity, acting on single donors with incorporation of molecular oxygen	5/ 445	55/ 29474	0.090909090909091	0.0014349222282863	0.1158406364184	HORVU.MOREX.r3.3HG0298030;HORVU.MOREX.r3.3HG0320900;HORVU.MOREX.r3.4HG0335790;HORVU.MOREX.r3.7HG0679840;HORVU.MOREX.r3.7HG0717870
15	GO:0005976	BP	polysaccharide metabolic process	15/ 445	408/ 29474	0.036764705882353	0.0015038363576949	0.11956773481266	HORVU.MOREX.r3.1HG0052720;HORVU.MOREX.r3.2HG0138320;HORVU.MOREX.r3.2HG0138340;HORVU.MOREX.r3.2HG0197610;HORVU.MOREX.r3.3HG0233990;HORVU.MOREX.r3.3HG0288960;HORVU.MOREX.r3.3HG0303220;HORVU.MOREX.r3.3HG0307850;HORVU.MOREX.r3.4HG0334850;HORVU.MOREX.r3.4HG0412150;HORVU.MOREX.r3.4HG0417260;HORVU.MOREX.r3.5HG0510640;HORVU.MOREX.r3.7HG0656620;HORVU.MOREX.r3.7HG0751740;HORVU.MOREX.r3.7HG0751750	starch synthase IIIblimit dextrinase
3	GO:0008061	MF	chitin binding	3/ 445	16/ 29474	0.1875	0.0016537896995597	0.12539617192544	HORVU.MOREX.r3.1HG0078800;HORVU.MOREX.r3.7HG0751740;HORVU.MOREX.r3.7HG0751750
4	GO:0019252	BP	starch biosynthetic process	4/ 445	34/ 29474	0.11764705882353	0.0016611136903309	0.12774236592364	HORVU.MOREX.r3.1HG0052720;HORVU.MOREX.r3.2HG0197610;HORVU.MOREX.r3.4HG0334850;HORVU.MOREX.r3.7HG0656620	starch synthase IIIblimit dextrinase
13	GO:0003006	BP	developmental process involved in reproduction	13/ 445	331/ 29474	0.039274924471299	0.0017110465213262	0.12945998760551	HORVU.MOREX.r3.2HG0197000;HORVU.MOREX.r3.2HG0197010;HORVU.MOREX.r3.4HG0393950;HORVU.MOREX.r3.5HG0470900;HORVU.MOREX.r3.5HG0473570;HORVU.MOREX.r3.5HG0527840;HORVU.MOREX.r3.6HG0592430;HORVU.MOREX.r3.6HG0623640;HORVU.MOREX.r3.7HG0637810;HORVU.MOREX.r3.7HG0674330;HORVU.MOREX.r3.7HG0675510;HORVU.MOREX.r3.7HG0707080;HORVU.MOREX.r3.7HG0735250
5	GO:0090729	MF	toxin activity	5/ 445	59/ 29474	0.084745762711864	0.0019659797084952	0.14480844824288	HORVU.MOREX.r3.5HG0525790;HORVU.MOREX.r3.6HG0538280;HORVU.MOREX.r3.6HG0538290;HORVU.MOREX.r3.6HG0538470;HORVU.MOREX.r3.7HG0685280	LemThio1
3	GO:0012511	CC	monolayer-surrounded lipid storage body	3/ 445	13/ 29474	0.23076923076923	0.0008735257918475	0.15234289809821	HORVU.MOREX.r3.1HG0091150;HORVU.MOREX.r3.5HG0473570;HORVU.MOREX.r3.7HG0677170
2	GO:0008172	MF	S-methyltransferase activity	2/ 445	5/ 29474	0.4	0.002206856619965	0.15803545461861	HORVU.MOREX.r3.3HG0292600;HORVU.MOREX.r3.4HG0395940
3	GO:0009631	BP	cold acclimation	3/ 445	18/ 29474	0.16666666666667	0.0023564384296267	0.1649858607967	HORVU.MOREX.r3.5HG0507390;HORVU.MOREX.r3.6HG0548110;HORVU.MOREX.r3.6HG0622760	DHN4
3	GO:2000895	BP	hemicellulose catabolic process	3/ 445	19/ 29474	0.15789473684211	0.0027671466719608	0.18282654983336	HORVU.MOREX.r3.2HG0138320;HORVU.MOREX.r3.2HG0138340;HORVU.MOREX.r3.3HG0307850
3	GO:0045493	BP	xylan catabolic process	3/ 445	19/ 29474	0.15789473684211	0.0027671466719608	0.18282654983336	HORVU.MOREX.r3.2HG0138320;HORVU.MOREX.r3.2HG0138340;HORVU.MOREX.r3.3HG0307850
3	GO:0044347	BP	cell wall polysaccharide catabolic process	3/ 445	19/ 29474	0.15789473684211	0.0027671466719608	0.18282654983336	HORVU.MOREX.r3.2HG0138320;HORVU.MOREX.r3.2HG0138340;HORVU.MOREX.r3.3HG0307850
54	GO:0006950	BP	response to stress	54/ 445	2389/ 29474	0.022603599832566	0.0028217442987736	0.18384447924371	HORVU.MOREX.r3.1HG0004310;HORVU.MOREX.r3.1HG0017620;HORVU.MOREX.r3.1HG0060220;HORVU.MOREX.r3.1HG0074440;HORVU.MOREX.r3.1HG0076260;HORVU.MOREX.r3.1HG0078590;HORVU.MOREX.r3.1HG0091620;HORVU.MOREX.r3.2HG0112560;HORVU.MOREX.r3.2HG0112610;HORVU.MOREX.r3.2HG0120360;HORVU.MOREX.r3.2HG0122530;HORVU.MOREX.r3.2HG0138340;HORVU.MOREX.r3.2HG0140970;HORVU.MOREX.r3.2HG0176250;HORVU.MOREX.r3.2HG0207080;HORVU.MOR…	poly(ADP-ribose) polymeraseHTH3LemThio1DHN4
5	GO:0004185	MF	serine-type carboxypeptidase activity	5/ 445	64/ 29474	0.078125	0.0028159685519413	0.19620451153797	HORVU.MOREX.r3.1HG0092280;HORVU.MOREX.r3.2HG0164090;HORVU.MOREX.r3.4HG0344540;HORVU.MOREX.r3.5HG0497260;HORVU.MOREX.r3.7HG0689920
5	GO:0070008	MF	serine-type exopeptidase activity	5/ 445	65/ 29474	0.076923076923077	0.0030134812464123	0.20444091192766	HORVU.MOREX.r3.1HG0092280;HORVU.MOREX.r3.2HG0164090;HORVU.MOREX.r3.4HG0344540;HORVU.MOREX.r3.5HG0497260;HORVU.MOREX.r3.7HG0689920
2	GO:0009514	CC	glyoxysome	2/ 445	5/ 29474	0.4	0.002206856619965	0.20478730998613	HORVU.MOREX.r3.2HG0139380;HORVU.MOREX.r3.2HG0176940
3	GO:0015250	MF	water channel activity	3/ 445	20/ 29474	0.15	0.0032192854009531	0.20748294409143	HORVU.MOREX.r3.1HG0046190;HORVU.MOREX.r3.2HG0183550;HORVU.MOREX.r3.3HG0249180	HvTIP32
3	GO:0005372	MF	water transmembrane transporter activity	3/ 445	20/ 29474	0.15	0.0032192854009531	0.20748294409143	HORVU.MOREX.r3.1HG0046190;HORVU.MOREX.r3.2HG0183550;HORVU.MOREX.r3.3HG0249180	HvTIP32
2	GO:0022611	BP	dormancy process	2/ 445	6/ 29474	0.33333333333333	0.0032772368528553	0.20775024428033	HORVU.MOREX.r3.5HG0527840;HORVU.MOREX.r3.7HG0707080
2	GO:0010162	BP	seed dormancy process	2/ 445	6/ 29474	0.33333333333333	0.0032772368528553	0.20775024428033	HORVU.MOREX.r3.5HG0527840;HORVU.MOREX.r3.7HG0707080
9	GO:0031226	CC	intrinsic component of plasma membrane	9/ 445	217/ 29474	0.04147465437788	0.0059695110312076	0.27519393705852	HORVU.MOREX.r3.1HG0059470;HORVU.MOREX.r3.1HG0060220;HORVU.MOREX.r3.3HG0285320;HORVU.MOREX.r3.3HG0288690;HORVU.MOREX.r3.3HG0319530;HORVU.MOREX.r3.4HG0336940;HORVU.MOREX.r3.4HG0399840;HORVU.MOREX.r3.6HG0600000;HORVU.MOREX.r3.7HG0658900	high affinity sulfate transporter HVST1
2	GO:0031351	CC	integral component of plastid membrane	2/ 445	8/ 29474	0.25	0.0059961981698531	0.27519393705852	HORVU.MOREX.r3.4HG0382640;HORVU.MOREX.r3.5HG0428820
2	GO:0031350	CC	intrinsic component of plastid membrane	2/ 445	8/ 29474	0.25	0.0059961981698531	0.27519393705852	HORVU.MOREX.r3.4HG0382640;HORVU.MOREX.r3.5HG0428820
2	GO:0031359	CC	integral component of chloroplast outer membrane	2/ 445	8/ 29474	0.25	0.0059961981698531	0.27519393705852	HORVU.MOREX.r3.4HG0382640;HORVU.MOREX.r3.5HG0428820
2	GO:0031355	CC	integral component of plastid outer membrane	2/ 445	8/ 29474	0.25	0.0059961981698531	0.27519393705852	HORVU.MOREX.r3.4HG0382640;HORVU.MOREX.r3.5HG0428820
2	GO:0031358	CC	intrinsic component of chloroplast outer membrane	2/ 445	8/ 29474	0.25	0.0059961981698531	0.27519393705852	HORVU.MOREX.r3.4HG0382640;HORVU.MOREX.r3.5HG0428820
2	GO:0031354	CC	intrinsic component of plastid outer membrane	2/ 445	8/ 29474	0.25	0.0059961981698531	0.27519393705852	HORVU.MOREX.r3.4HG0382640;HORVU.MOREX.r3.5HG0428820
5	GO:1901606	BP	alpha-amino acid catabolic process	5/ 445	72/ 29474	0.069444444444444	0.0046856550499427	0.27823301062382	HORVU.MOREX.r3.2HG0181700;HORVU.MOREX.r3.4HG0393690;HORVU.MOREX.r3.5HG0481320;HORVU.MOREX.r3.5HG0496620;HORVU.MOREX.r3.6HG0575740
5	GO:0009063	BP	cellular amino acid catabolic process	5/ 445	73/ 29474	0.068493150684932	0.0049691273526019	0.2913772051382	HORVU.MOREX.r3.2HG0181700;HORVU.MOREX.r3.4HG0393690;HORVU.MOREX.r3.5HG0481320;HORVU.MOREX.r3.5HG0496620;HORVU.MOREX.r3.6HG0575740
5	GO:0004180	MF	carboxypeptidase activity	5/ 445	72/ 29474	0.069444444444444	0.0046856550499427	0.29462484679884	HORVU.MOREX.r3.1HG0092280;HORVU.MOREX.r3.2HG0164090;HORVU.MOREX.r3.4HG0344540;HORVU.MOREX.r3.5HG0497260;HORVU.MOREX.r3.7HG0689920
5	GO:0009414	BP	response to water deprivation	5/ 445	75/ 29474	0.066666666666667	0.0055721689891252	0.32270425590107	HORVU.MOREX.r3.3HG0248140;HORVU.MOREX.r3.3HG0288960;HORVU.MOREX.r3.5HG0507390;HORVU.MOREX.r3.6HG0548110;HORVU.MOREX.r3.6HG0622760	DHN4
2	GO:0071421	BP	manganese ion transmembrane transport	2/ 445	8/ 29474	0.25	0.0059961981698531	0.33889356162387	HORVU.MOREX.r3.3HG0303160;HORVU.MOREX.r3.4HG0393950
2	GO:0006828	BP	manganese ion transport	2/ 445	8/ 29474	0.25	0.0059961981698531	0.33889356162387	HORVU.MOREX.r3.3HG0303160;HORVU.MOREX.r3.4HG0393950
19	GO:0005829	CC	cytosol	19/ 445	665/ 29474	0.028571428571429	0.0087837399740088	0.36473434558741	HORVU.MOREX.r3.1HG0061770;HORVU.MOREX.r3.1HG0061790;HORVU.MOREX.r3.1HG0071540;HORVU.MOREX.r3.1HG0095170;HORVU.MOREX.r3.2HG0163240;HORVU.MOREX.r3.2HG0163250;HORVU.MOREX.r3.2HG0171740;HORVU.MOREX.r3.2HG0181700;HORVU.MOREX.r3.3HG0231180;HORVU.MOREX.r3.3HG0248140;HORVU.MOREX.r3.4HG0393690;HORVU.MOREX.r3.4HG0406790;HORVU.MOREX.r3.5HG0487140;HORVU.MOREX.r3.5HG0507390;HORVU.MOREX.r3.5HG0532460;HORVU.MOR…	DHN4
5	GO:0009185	BP	ribonucleoside diphosphate metabolic process	5/ 445	78/ 29474	0.064102564102564	0.006570878671887	0.36695228392646	HORVU.MOREX.r3.3HG0236660;HORVU.MOREX.r3.3HG0243310;HORVU.MOREX.r3.3HG0287610;HORVU.MOREX.r3.4HG0379300;HORVU.MOREX.r3.7HG0647190
15	GO:0022414	BP	reproductive process	15/ 445	475/ 29474	0.031578947368421	0.0068667862922155	0.37800267956649	HORVU.MOREX.r3.1HG0091150;HORVU.MOREX.r3.2HG0197000;HORVU.MOREX.r3.2HG0197010;HORVU.MOREX.r3.4HG0393950;HORVU.MOREX.r3.5HG0470900;HORVU.MOREX.r3.5HG0473570;HORVU.MOREX.r3.5HG0527840;HORVU.MOREX.r3.6HG0592430;HORVU.MOREX.r3.6HG0623640;HORVU.MOREX.r3.7HG0637810;HORVU.MOREX.r3.7HG0674330;HORVU.MOREX.r3.7HG0675510;HORVU.MOREX.r3.7HG0677170;HORVU.MOREX.r3.7HG0707080;HORVU.MOREX.r3.7HG0735250
5	GO:0030162	BP	regulation of proteolysis	5/ 445	79/ 29474	0.063291139240506	0.0069299148247108	0.37800267956649	HORVU.MOREX.r3.1HG0004310;HORVU.MOREX.r3.1HG0066680;HORVU.MOREX.r3.3HG0222380;HORVU.MOREX.r3.3HG0222570;HORVU.MOREX.r3.5HG0524850
2	GO:0004032	MF	alditol:NADP+ 1-oxidoreductase activity	2/ 445	9/ 29474	0.22222222222222	0.0076327210807744	0.43727010991636	HORVU.MOREX.r3.1HG0071540;HORVU.MOREX.r3.2HG0171740
2	GO:0008106	MF	alcohol dehydrogenase (NADP+) activity	2/ 445	9/ 29474	0.22222222222222	0.0076327210807744	0.43727010991636	HORVU.MOREX.r3.1HG0071540;HORVU.MOREX.r3.2HG0171740
2	GO:0008198	MF	ferrous iron binding	2/ 445	9/ 29474	0.22222222222222	0.0076327210807744	0.43727010991636	HORVU.MOREX.r3.1HG0090010;HORVU.MOREX.r3.3HG0298030
11	GO:0015291	MF	secondary active transmembrane transporter activity	11/ 445	311/ 29474	0.035369774919614	0.0080938379417534	0.45360683073566	HORVU.MOREX.r3.1HG0084890;HORVU.MOREX.r3.2HG0199560;HORVU.MOREX.r3.3HG0285320;HORVU.MOREX.r3.3HG0291400;HORVU.MOREX.r3.3HG0303160;HORVU.MOREX.r3.4HG0399840;HORVU.MOREX.r3.4HG0409380;HORVU.MOREX.r3.5HG0508840;HORVU.MOREX.r3.6HG0630650;HORVU.MOREX.r3.7HG0671320;HORVU.MOREX.r3.7HG0675240	high affinity sulfate transporter HVST1Bot1
4	GO:0006099	BP	tricarboxylic acid cycle	4/ 445	54/ 29474	0.074074074074074	0.0089458938801882	0.46890692069547	HORVU.MOREX.r3.2HG0139380;HORVU.MOREX.r3.2HG0176940;HORVU.MOREX.r3.5HG0476490;HORVU.MOREX.r3.7HG0709970
36	GO:0009056	BP	catabolic process	36/ 445	1531/ 29474	0.023514043109079	0.009281741344737	0.46890692069547	HORVU.MOREX.r3.1HG0017620;HORVU.MOREX.r3.1HG0074250;HORVU.MOREX.r3.2HG0097360;HORVU.MOREX.r3.2HG0112560;HORVU.MOREX.r3.2HG0112610;HORVU.MOREX.r3.2HG0120360;HORVU.MOREX.r3.2HG0138320;HORVU.MOREX.r3.2HG0138340;HORVU.MOREX.r3.2HG0181700;HORVU.MOREX.r3.2HG0203800;HORVU.MOREX.r3.2HG0207080;HORVU.MOREX.r3.3HG0222560;HORVU.MOREX.r3.3HG0222570;HORVU.MOREX.r3.3HG0236660;HORVU.MOREX.r3.3HG0287610;HORVU.MOR…	limit dextrinase
3	GO:0010150	BP	leaf senescence	3/ 445	29/ 29474	0.10344827586207	0.0093349100402702	0.46890692069547	HORVU.MOREX.r3.2HG0141190;HORVU.MOREX.r3.3HG0236540;HORVU.MOREX.r3.3HG0309890
2	GO:0008272	BP	sulfate transport	2/ 445	10/ 29474	0.2	0.0094461289854358	0.46890692069547	HORVU.MOREX.r3.3HG0285320;HORVU.MOREX.r3.4HG0399840	high affinity sulfate transporter HVST1
11	GO:0098542	BP	defense response to other organism	11/ 445	318/ 29474	0.034591194968553	0.0094656461246853	0.46890692069547	HORVU.MOREX.r3.1HG0060220;HORVU.MOREX.r3.2HG0138340;HORVU.MOREX.r3.3HG0288960;HORVU.MOREX.r3.3HG0326310;HORVU.MOREX.r3.4HG0335650;HORVU.MOREX.r3.5HG0423130;HORVU.MOREX.r3.5HG0525790;HORVU.MOREX.r3.6HG0632030;HORVU.MOREX.r3.7HG0685280;HORVU.MOREX.r3.7HG0751740;HORVU.MOREX.r3.7HG0751750
2	GO:0102229	MF	amylopectin maltohydrolase activity	2/ 445	10/ 29474	0.2	0.0094461289854358	0.49744280443879	HORVU.MOREX.r3.4HG0412150;HORVU.MOREX.r3.4HG0417260
41	GO:0005215	MF	transporter activity	41/ 445	1811/ 29474	0.02263942573164	0.0094548865079521	0.49744280443879	HORVU.MOREX.r3.1HG0010640;HORVU.MOREX.r3.1HG0046190;HORVU.MOREX.r3.1HG0084890;HORVU.MOREX.r3.2HG0103630;HORVU.MOREX.r3.2HG0182810;HORVU.MOREX.r3.2HG0183550;HORVU.MOREX.r3.2HG0199560;HORVU.MOREX.r3.3HG0249180;HORVU.MOREX.r3.3HG0269930;HORVU.MOREX.r3.3HG0270500;HORVU.MOREX.r3.3HG0282510;HORVU.MOREX.r3.3HG0282640;HORVU.MOREX.r3.3HG0285320;HORVU.MOREX.r3.3HG0291400;HORVU.MOREX.r3.3HG0299050;HORVU.MOR…	HvTIP32high affinity sulfate transporter HVST1Bot1
6	GO:0051213	MF	dioxygenase activity	6/ 445	120/ 29474	0.05	0.0098868528062291	0.50976613068917	HORVU.MOREX.r3.1HG0021960;HORVU.MOREX.r3.3HG0289810;HORVU.MOREX.r3.3HG0298030;HORVU.MOREX.r3.3HG0320900;HORVU.MOREX.r3.4HG0335790;HORVU.MOREX.r3.7HG0679840
3	GO:0005811	CC	lipid droplet	3/ 445	33/ 29474	0.090909090909091	0.013334501674515	0.51201976451531	HORVU.MOREX.r3.1HG0091150;HORVU.MOREX.r3.5HG0473570;HORVU.MOREX.r3.7HG0677170
1	GO:0035618	CC	root hair	1/ 445	1/ 29474	1	0.015098052520866	0.51201976451531	HORVU.MOREX.r3.4HG0393950
9	GO:0048046	CC	apoplast	9/ 445	253/ 29474	0.035573122529644	0.015265021158657	0.51201976451531	HORVU.MOREX.r3.2HG0097360;HORVU.MOREX.r3.2HG0194770;HORVU.MOREX.r3.3HG0233990;HORVU.MOREX.r3.5HG0429390;HORVU.MOREX.r3.5HG0462190;HORVU.MOREX.r3.6HG0628410;HORVU.MOREX.r3.7HG0650550;HORVU.MOREX.r3.7HG0721830;HORVU.MOREX.r3.7HG0721840
3	GO:0090693	BP	plant organ senescence	3/ 445	31/ 29474	0.096774193548387	0.01123165992716	0.54883038248236	HORVU.MOREX.r3.2HG0141190;HORVU.MOREX.r3.3HG0236540;HORVU.MOREX.r3.3HG0309890
7	GO:0015297	MF	antiporter activity	7/ 445	160/ 29474	0.04375	0.011083172925888	0.56024352554784	HORVU.MOREX.r3.1HG0084890;HORVU.MOREX.r3.3HG0291400;HORVU.MOREX.r3.3HG0303160;HORVU.MOREX.r3.4HG0409380;HORVU.MOREX.r3.6HG0630650;HORVU.MOREX.r3.7HG0671320;HORVU.MOREX.r3.7HG0675240	Bot1
2	GO:0016161	MF	beta-amylase activity	2/ 445	11/ 29474	0.18181818181818	0.011430732071732	0.5667005246332	HORVU.MOREX.r3.4HG0412150;HORVU.MOREX.r3.4HG0417260
40	GO:0022857	MF	transmembrane transporter activity	40/ 445	1777/ 29474	0.022509848058526	0.011750320149867	0.56900097814112	HORVU.MOREX.r3.1HG0010640;HORVU.MOREX.r3.1HG0046190;HORVU.MOREX.r3.1HG0084890;HORVU.MOREX.r3.2HG0103630;HORVU.MOREX.r3.2HG0182810;HORVU.MOREX.r3.2HG0183550;HORVU.MOREX.r3.2HG0199560;HORVU.MOREX.r3.3HG0249180;HORVU.MOREX.r3.3HG0269930;HORVU.MOREX.r3.3HG0270500;HORVU.MOREX.r3.3HG0282510;HORVU.MOREX.r3.3HG0282640;HORVU.MOREX.r3.3HG0285320;HORVU.MOREX.r3.3HG0291400;HORVU.MOREX.r3.3HG0299050;HORVU.MOR…	HvTIP32high affinity sulfate transporter HVST1Bot1
3	GO:0004568	MF	chitinase activity	3/ 445	32/ 29474	0.09375	0.012257109615095	0.56900097814112	HORVU.MOREX.r3.2HG0138340;HORVU.MOREX.r3.7HG0751740;HORVU.MOREX.r3.7HG0751750
3	GO:0030598	MF	rRNA N-glycosylase activity	3/ 445	34/ 29474	0.088235294117647	0.014464184382661	0.56900097814112	HORVU.MOREX.r3.2HG0216340;HORVU.MOREX.r3.5HG0525790;HORVU.MOREX.r3.7HG0685280
1	GO:0004474	MF	malate synthase activity	1/ 445	1/ 29474	1	0.015098052520866	0.56900097814112	HORVU.MOREX.r3.2HG0176940
1	GO:0051060	MF	pullulanase activity	1/ 445	1/ 29474	1	0.015098052520866	0.56900097814112	HORVU.MOREX.r3.7HG0656620	limit dextrinase
1	GO:0004604	MF	phosphoadenylyl-sulfate reductase (thioredoxin) activity	1/ 445	1/ 29474	1	0.015098052520866	0.56900097814112	HORVU.MOREX.r3.2HG0142030
1	GO:0010303	MF	limit dextrinase activity	1/ 445	1/ 29474	1	0.015098052520866	0.56900097814112	HORVU.MOREX.r3.7HG0656620	limit dextrinase
1	GO:0008265	MF	Mo-molybdopterin cofactor sulfurase activity	1/ 445	1/ 29474	1	0.015098052520866	0.56900097814112	HORVU.MOREX.r3.7HG0736870
1	GO:1990136	MF	linoleate 9S-lipoxygenase activity	1/ 445	1/ 29474	1	0.015098052520866	0.56900097814112	HORVU.MOREX.r3.4HG0335790
1	GO:2001071	MF	maltoheptaose binding	1/ 445	1/ 29474	1	0.015098052520866	0.56900097814112	HORVU.MOREX.r3.4HG0334850
1	GO:0004451	MF	isocitrate lyase activity	1/ 445	1/ 29474	1	0.015098052520866	0.56900097814112	HORVU.MOREX.r3.2HG0139380
1	GO:0050113	MF	inositol oxygenase activity	1/ 445	1/ 29474	1	0.015098052520866	0.56900097814112	HORVU.MOREX.r3.7HG0717870
1	GO:1990404	MF	NAD+-protein ADP-ribosyltransferase activity	1/ 445	1/ 29474	1	0.015098052520866	0.56900097814112	HORVU.MOREX.r3.1HG0078590	poly(ADP-ribose) polymerase
1	GO:0102867	MF	molybdenum cofactor sulfurtransferase activity	1/ 445	1/ 29474	1	0.015098052520866	0.56900097814112	HORVU.MOREX.r3.7HG0736870
1	GO:0004595	MF	pantetheine-phosphate adenylyltransferase activity	1/ 445	1/ 29474	1	0.015098052520866	0.56900097814112	HORVU.MOREX.r3.6HG0554840
1	GO:0004417	MF	hydroxyethylthiazole kinase activity	1/ 445	1/ 29474	1	0.015098052520866	0.56900097814112	HORVU.MOREX.r3.3HG0315580
3	GO:0030597	MF	RNA glycosylase activity	3/ 445	35/ 29474	0.085714285714286	0.015646451633647	0.56900097814112	HORVU.MOREX.r3.2HG0216340;HORVU.MOREX.r3.5HG0525790;HORVU.MOREX.r3.7HG0685280
2	GO:0003872	MF	6-phosphofructokinase activity	2/ 445	13/ 29474	0.15384615384615	0.015891415991528	0.56900097814112	HORVU.MOREX.r3.3HG0236660;HORVU.MOREX.r3.3HG0287610
2	GO:0004022	MF	alcohol dehydrogenase (NAD+) activity	2/ 445	13/ 29474	0.15384615384615	0.015891415991528	0.56900097814112	HORVU.MOREX.r3.1HG0082960;HORVU.MOREX.r3.4HG0406790	ADH4
2	GO:0018455	MF	alcohol dehydrogenase [NAD(P)+] activity	2/ 445	13/ 29474	0.15384615384615	0.015891415991528	0.56900097814112	HORVU.MOREX.r3.1HG0082960;HORVU.MOREX.r3.4HG0406790	ADH4
8	GO:0044282	BP	small molecule catabolic process	8/ 445	202/ 29474	0.03960396039604	0.012032580829871	0.56910126617684	HORVU.MOREX.r3.2HG0181700;HORVU.MOREX.r3.4HG0379300;HORVU.MOREX.r3.4HG0393690;HORVU.MOREX.r3.4HG0406790;HORVU.MOREX.r3.5HG0481320;HORVU.MOREX.r3.5HG0496620;HORVU.MOREX.r3.6HG0575740;HORVU.MOREX.r3.7HG0717870
4	GO:0005982	BP	starch metabolic process	4/ 445	60/ 29474	0.066666666666667	0.012857423489796	0.56910126617684	HORVU.MOREX.r3.1HG0052720;HORVU.MOREX.r3.2HG0197610;HORVU.MOREX.r3.4HG0334850;HORVU.MOREX.r3.7HG0656620	starch synthase IIIblimit dextrinase
5	GO:0009132	BP	nucleoside diphosphate metabolic process	5/ 445	92/ 29474	0.054347826086957	0.012912416092489	0.56910126617684	HORVU.MOREX.r3.3HG0236660;HORVU.MOREX.r3.3HG0243310;HORVU.MOREX.r3.3HG0287610;HORVU.MOREX.r3.4HG0379300;HORVU.MOREX.r3.7HG0647190
33	GO:0055085	BP	transmembrane transport	33/ 445	1421/ 29474	0.023223082336383	0.01383152699898	0.56910126617684	HORVU.MOREX.r3.1HG0010640;HORVU.MOREX.r3.1HG0046190;HORVU.MOREX.r3.1HG0084890;HORVU.MOREX.r3.2HG0103630;HORVU.MOREX.r3.2HG0182810;HORVU.MOREX.r3.2HG0183550;HORVU.MOREX.r3.2HG0199560;HORVU.MOREX.r3.3HG0247650;HORVU.MOREX.r3.3HG0249180;HORVU.MOREX.r3.3HG0269930;HORVU.MOREX.r3.3HG0270500;HORVU.MOREX.r3.3HG0282510;HORVU.MOREX.r3.3HG0282640;HORVU.MOREX.r3.3HG0285320;HORVU.MOREX.r3.3HG0291400;HORVU.MOR…	HvTIP32high affinity sulfate transporter HVST1
1	GO:0019379	BP	sulfate assimilation, phosphoadenylyl sulfate reduction by phosphoadenylyl-sulfate reductase (thioredoxin)	1/ 445	1/ 29474	1	0.015098052520866	0.56910126617684	HORVU.MOREX.r3.2HG0142030
1	GO:0019310	BP	inositol catabolic process	1/ 445	1/ 29474	1	0.015098052520866	0.56910126617684	HORVU.MOREX.r3.7HG0717870
1	GO:0010042	BP	response to manganese ion	1/ 445	1/ 29474	1	0.015098052520866	0.56910126617684	HORVU.MOREX.r3.3HG0303160
1	GO:0006225	BP	UDP biosynthetic process	1/ 445	1/ 29474	1	0.015098052520866	0.56910126617684	HORVU.MOREX.r3.3HG0243310
1	GO:0036172	BP	thiamine salvage	1/ 445	1/ 29474	1	0.015098052520866	0.56910126617684	HORVU.MOREX.r3.3HG0315580
1	GO:0009193	BP	pyrimidine ribonucleoside diphosphate metabolic process	1/ 445	1/ 29474	1	0.015098052520866	0.56910126617684	HORVU.MOREX.r3.3HG0243310
1	GO:0019419	BP	sulfate reduction	1/ 445	1/ 29474	1	0.015098052520866	0.56910126617684	HORVU.MOREX.r3.2HG0142030
1	GO:0031179	BP	peptide modification	1/ 445	1/ 29474	1	0.015098052520866	0.56910126617684	HORVU.MOREX.r3.1HG0047100
1	GO:1900371	BP	regulation of purine nucleotide biosynthetic process	1/ 445	1/ 29474	1	0.015098052520866	0.56910126617684	HORVU.MOREX.r3.6HG0554840
1	GO:0030808	BP	regulation of nucleotide biosynthetic process	1/ 445	1/ 29474	1	0.015098052520866	0.56910126617684	HORVU.MOREX.r3.6HG0554840
1	GO:0090229	BP	negative regulation of red or far-red light signaling pathway	1/ 445	1/ 29474	1	0.015098052520866	0.56910126617684	HORVU.MOREX.r3.5HG0515900
1	GO:0010438	BP	cellular response to sulfur starvation	1/ 445	1/ 29474	1	0.015098052520866	0.56910126617684	HORVU.MOREX.r3.1HG0076260
1	GO:0046705	BP	CDP biosynthetic process	1/ 445	1/ 29474	1	0.015098052520866	0.56910126617684	HORVU.MOREX.r3.3HG0243310
1	GO:1900542	BP	regulation of purine nucleotide metabolic process	1/ 445	1/ 29474	1	0.015098052520866	0.56910126617684	HORVU.MOREX.r3.6HG0554840
1	GO:0009194	BP	pyrimidine ribonucleoside diphosphate biosynthetic process	1/ 445	1/ 29474	1	0.015098052520866	0.56910126617684	HORVU.MOREX.r3.3HG0243310
1	GO:0046048	BP	UDP metabolic process	1/ 445	1/ 29474	1	0.015098052520866	0.56910126617684	HORVU.MOREX.r3.3HG0243310
1	GO:0098755	BP	maintenance of seed dormancy by absisic acid	1/ 445	1/ 29474	1	0.015098052520866	0.56910126617684	HORVU.MOREX.r3.5HG0527840
1	GO:0046704	BP	CDP metabolic process	1/ 445	1/ 29474	1	0.015098052520866	0.56910126617684	HORVU.MOREX.r3.3HG0243310
1	GO:0010439	BP	regulation of glucosinolate biosynthetic process	1/ 445	1/ 29474	1	0.015098052520866	0.56910126617684	HORVU.MOREX.r3.1HG0076260
1	GO:0080020	BP	regulation of coenzyme A biosynthetic process	1/ 445	1/ 29474	1	0.015098052520866	0.56910126617684	HORVU.MOREX.r3.6HG0554840
1	GO:0009188	BP	ribonucleoside diphosphate biosynthetic process	1/ 445	1/ 29474	1	0.015098052520866	0.56910126617684	HORVU.MOREX.r3.3HG0243310
1	GO:0006140	BP	regulation of nucleotide metabolic process	1/ 445	1/ 29474	1	0.015098052520866	0.56910126617684	HORVU.MOREX.r3.6HG0554840
1	GO:0009061	BP	anaerobic respiration	1/ 445	1/ 29474	1	0.015098052520866	0.56910126617684	HORVU.MOREX.r3.1HG0091620
4	GO:0009066	BP	aspartate family amino acid metabolic process	4/ 445	63/ 29474	0.063492063492063	0.015164710780666	0.56910126617684	HORVU.MOREX.r3.2HG0181700;HORVU.MOREX.r3.3HG0231180;HORVU.MOREX.r3.3HG0292600;HORVU.MOREX.r3.4HG0395940
2	GO:0072348	BP	sulfur compound transport	2/ 445	13/ 29474	0.15384615384615	0.015891415991528	0.59163993981159	HORVU.MOREX.r3.3HG0285320;HORVU.MOREX.r3.4HG0399840	high affinity sulfate transporter HVST1
2	GO:0004033	MF	aldo-keto reductase (NADP) activity	2/ 445	14/ 29474	0.14285714285714	0.018356760785292	0.62268064874318	HORVU.MOREX.r3.1HG0071540;HORVU.MOREX.r3.2HG0171740
5	GO:0008238	MF	exopeptidase activity	5/ 445	101/ 29474	0.04950495049505	0.018653822542582	0.62453966902309	HORVU.MOREX.r3.1HG0092280;HORVU.MOREX.r3.2HG0164090;HORVU.MOREX.r3.4HG0344540;HORVU.MOREX.r3.5HG0497260;HORVU.MOREX.r3.7HG0689920
77	GO:0043169	MF	cation binding	77/ 445	3967/ 29474	0.019410133602218	0.020653948367961	0.65138989297129	HORVU.MOREX.r3.1HG0017620;HORVU.MOREX.r3.1HG0021960;HORVU.MOREX.r3.1HG0054710;HORVU.MOREX.r3.1HG0078590;HORVU.MOREX.r3.1HG0082810;HORVU.MOREX.r3.1HG0082960;HORVU.MOREX.r3.1HG0090010;HORVU.MOREX.r3.2HG0097360;HORVU.MOREX.r3.2HG0106830;HORVU.MOREX.r3.2HG0112560;HORVU.MOREX.r3.2HG0112610;HORVU.MOREX.r3.2HG0114450;HORVU.MOREX.r3.2HG0120360;HORVU.MOREX.r3.2HG0139380;HORVU.MOREX.r3.2HG0169040;HORVU.MOR…	poly(ADP-ribose) polymeraseADH4limit dextrinaseCPSL1
2	GO:2001070	MF	starch binding	2/ 445	15/ 29474	0.13333333333333	0.02097182355183	0.65138989297129	HORVU.MOREX.r3.2HG0197610;HORVU.MOREX.r3.4HG0334850	starch synthase IIIb
2	GO:0046030	MF	inositol trisphosphate phosphatase activity	2/ 445	15/ 29474	0.13333333333333	0.02097182355183	0.65138989297129	HORVU.MOREX.r3.1HG0081110;HORVU.MOREX.r3.5HG0478700
2	GO:0004445	MF	inositol-polyphosphate 5-phosphatase activity	2/ 445	15/ 29474	0.13333333333333	0.02097182355183	0.65138989297129	HORVU.MOREX.r3.1HG0081110;HORVU.MOREX.r3.5HG0478700
2	GO:0008271	MF	secondary active sulfate transmembrane transporter activity	2/ 445	15/ 29474	0.13333333333333	0.02097182355183	0.65138989297129	HORVU.MOREX.r3.3HG0285320;HORVU.MOREX.r3.4HG0399840	high affinity sulfate transporter HVST1
2	GO:0008443	MF	phosphofructokinase activity	2/ 445	15/ 29474	0.13333333333333	0.02097182355183	0.65138989297129	HORVU.MOREX.r3.3HG0236660;HORVU.MOREX.r3.3HG0287610
11	GO:0006979	BP	response to oxidative stress	11/ 445	328/ 29474	0.033536585365854	0.01834599364606	0.66239665264464	HORVU.MOREX.r3.1HG0017620;HORVU.MOREX.r3.1HG0091620;HORVU.MOREX.r3.2HG0112560;HORVU.MOREX.r3.2HG0112610;HORVU.MOREX.r3.2HG0120360;HORVU.MOREX.r3.2HG0140970;HORVU.MOREX.r3.2HG0176250;HORVU.MOREX.r3.2HG0207080;HORVU.MOREX.r3.3HG0325540;HORVU.MOREX.r3.7HG0714160;HORVU.MOREX.r3.7HG0728980
2	GO:0010256	BP	endomembrane system organization	2/ 445	14/ 29474	0.14285714285714	0.018356760785292	0.66239665264464	HORVU.MOREX.r3.1HG0087590;HORVU.MOREX.r3.7HG0730320
5	GO:0006090	BP	pyruvate metabolic process	5/ 445	101/ 29474	0.04950495049505	0.018653822542582	0.66797772173477	HORVU.MOREX.r3.3HG0236660;HORVU.MOREX.r3.3HG0287610;HORVU.MOREX.r3.3HG0288030;HORVU.MOREX.r3.4HG0379300;HORVU.MOREX.r3.7HG0647190
23	GO:0006082	BP	organic acid metabolic process	23/ 445	925/ 29474	0.024864864864865	0.019044723249968	0.67680906640607	HORVU.MOREX.r3.2HG0139380;HORVU.MOREX.r3.2HG0142030;HORVU.MOREX.r3.2HG0176940;HORVU.MOREX.r3.2HG0181700;HORVU.MOREX.r3.3HG0231180;HORVU.MOREX.r3.3HG0236660;HORVU.MOREX.r3.3HG0287610;HORVU.MOREX.r3.3HG0288030;HORVU.MOREX.r3.3HG0289810;HORVU.MOREX.r3.3HG0292600;HORVU.MOREX.r3.3HG0320040;HORVU.MOREX.r3.4HG0335790;HORVU.MOREX.r3.4HG0361660;HORVU.MOREX.r3.4HG0379300;HORVU.MOREX.r3.4HG0393690;HORVU.MOR…
2	GO:0042995	CC	cell projection	2/ 445	16/ 29474	0.125	0.023731542673583	0.67702474401167	HORVU.MOREX.r3.4HG0393950;HORVU.MOREX.r3.7HG0667150
6	GO:0046658	CC	anchored component of plasma membrane	6/ 445	148/ 29474	0.040540540540541	0.025211527489761	0.68701412409599	HORVU.MOREX.r3.1HG0059470;HORVU.MOREX.r3.1HG0060220;HORVU.MOREX.r3.3HG0288690;HORVU.MOREX.r3.3HG0319530;HORVU.MOREX.r3.4HG0336940;HORVU.MOREX.r3.6HG0600000
9	GO:1901605	BP	alpha-amino acid metabolic process	9/ 445	264/ 29474	0.034090909090909	0.019545426625658	0.6893804233155	HORVU.MOREX.r3.2HG0142030;HORVU.MOREX.r3.2HG0181700;HORVU.MOREX.r3.3HG0231180;HORVU.MOREX.r3.3HG0292600;HORVU.MOREX.r3.4HG0393690;HORVU.MOREX.r3.4HG0395940;HORVU.MOREX.r3.5HG0481320;HORVU.MOREX.r3.5HG0496620;HORVU.MOREX.r3.6HG0575740
2	GO:0140323	MF	solute:anion antiporter activity	2/ 445	16/ 29474	0.125	0.023731542673583	0.69857254094119	HORVU.MOREX.r3.4HG0409380;HORVU.MOREX.r3.7HG0671320	Bot1
7	GO:0016616	MF	oxidoreductase activity, acting on the CH-OH group of donors, NAD or NADP as acceptor	7/ 445	187/ 29474	0.037433155080214	0.023958820143377	0.69857254094119	HORVU.MOREX.r3.1HG0071540;HORVU.MOREX.r3.1HG0082960;HORVU.MOREX.r3.2HG0171740;HORVU.MOREX.r3.3HG0288030;HORVU.MOREX.r3.4HG0406790;HORVU.MOREX.r3.5HG0468580;HORVU.MOREX.r3.5HG0479000	ADH4
5	GO:0030145	MF	manganese ion binding	5/ 445	108/ 29474	0.046296296296296	0.024128570209237	0.69857254094119	HORVU.MOREX.r3.4HG0379300;HORVU.MOREX.r3.5HG0429390;HORVU.MOREX.r3.6HG0628410;HORVU.MOREX.r3.7HG0721830;HORVU.MOREX.r3.7HG0721840
76	GO:0046872	MF	metal ion binding	76/ 445	3934/ 29474	0.019318759532283	0.024315581363698	0.69857254094119	HORVU.MOREX.r3.1HG0017620;HORVU.MOREX.r3.1HG0021960;HORVU.MOREX.r3.1HG0054710;HORVU.MOREX.r3.1HG0078590;HORVU.MOREX.r3.1HG0082810;HORVU.MOREX.r3.1HG0082960;HORVU.MOREX.r3.1HG0090010;HORVU.MOREX.r3.2HG0097360;HORVU.MOREX.r3.2HG0106830;HORVU.MOREX.r3.2HG0112560;HORVU.MOREX.r3.2HG0112610;HORVU.MOREX.r3.2HG0114450;HORVU.MOREX.r3.2HG0120360;HORVU.MOREX.r3.2HG0139380;HORVU.MOREX.r3.2HG0169040;HORVU.MOR…	poly(ADP-ribose) polymeraseADH4limit dextrinaseCPSL1
2	GO:0015116	MF	sulfate transmembrane transporter activity	2/ 445	17/ 29474	0.11764705882353	0.026630974644711	0.71536297514867	HORVU.MOREX.r3.3HG0285320;HORVU.MOREX.r3.4HG0399840	high affinity sulfate transporter HVST1
2	GO:0052745	MF	inositol phosphate phosphatase activity	2/ 445	17/ 29474	0.11764705882353	0.026630974644711	0.71536297514867	HORVU.MOREX.r3.1HG0081110;HORVU.MOREX.r3.5HG0478700
10	GO:0004857	MF	enzyme inhibitor activity	10/ 445	300/ 29474	0.033333333333333	0.026635568065738	0.71536297514867	HORVU.MOREX.r3.1HG0004310;HORVU.MOREX.r3.1HG0066680;HORVU.MOREX.r3.1HG0067140;HORVU.MOREX.r3.2HG0122530;HORVU.MOREX.r3.2HG0138340;HORVU.MOREX.r3.2HG0194770;HORVU.MOREX.r3.3HG0222380;HORVU.MOREX.r3.3HG0222560;HORVU.MOREX.r3.3HG0222570;HORVU.MOREX.r3.5HG0524850
2	GO:0051139	MF	metal cation:proton antiporter activity	2/ 445	18/ 29474	0.11111111111111	0.029665291671597	0.71536297514867	HORVU.MOREX.r3.3HG0303160;HORVU.MOREX.r3.7HG0675240
2	GO:0140828	MF	metal cation:monoatomic cation antiporter activity	2/ 445	18/ 29474	0.11111111111111	0.029665291671597	0.71536297514867	HORVU.MOREX.r3.3HG0303160;HORVU.MOREX.r3.7HG0675240
1	GO:0004848	MF	ureidoglycolate hydrolase activity	1/ 445	2/ 29474	0.5	0.029968658384816	0.71536297514867	HORVU.MOREX.r3.3HG0303680
1	GO:0004719	MF	protein-L-isoaspartate (D-aspartate) O-methyltransferase activity	1/ 445	2/ 29474	0.5	0.029968658384816	0.71536297514867	HORVU.MOREX.r3.2HG0176030
1	GO:0033949	MF	fructan beta-(2,6)-fructosidase activity	1/ 445	2/ 29474	0.5	0.029968658384816	0.71536297514867	HORVU.MOREX.r3.2HG0209220
1	GO:0047150	MF	betaine-homocysteine S-methyltransferase activity	1/ 445	2/ 29474	0.5	0.029968658384816	0.71536297514867	HORVU.MOREX.r3.3HG0292600
1	GO:0004793	MF	threonine aldolase activity	1/ 445	2/ 29474	0.5	0.029968658384816	0.71536297514867	HORVU.MOREX.r3.2HG0181700
1	GO:0001025	MF	RNA polymerase III general transcription initiation factor binding	1/ 445	2/ 29474	0.5	0.029968658384816	0.71536297514867	HORVU.MOREX.r3.1HG0068660
1	GO:2001066	MF	amylopectin binding	1/ 445	2/ 29474	0.5	0.029968658384816	0.71536297514867	HORVU.MOREX.r3.4HG0334850
1	GO:0008732	MF	L-allo-threonine aldolase activity	1/ 445	2/ 29474	0.5	0.029968658384816	0.71536297514867	HORVU.MOREX.r3.2HG0181700
1	GO:0010486	MF	manganese:proton antiporter activity	1/ 445	2/ 29474	0.5	0.029968658384816	0.71536297514867	HORVU.MOREX.r3.3HG0303160
1	GO:0001156	MF	TFIIIC-class transcription factor complex binding	1/ 445	2/ 29474	0.5	0.029968658384816	0.71536297514867	HORVU.MOREX.r3.1HG0068660
1	GO:0102040	MF	fumarate reductase (menaquinone)	1/ 445	2/ 29474	0.5	0.029968658384816	0.71536297514867	HORVU.MOREX.r3.5HG0476490
3	GO:0016702	MF	oxidoreductase activity, acting on single donors with incorporation of molecular oxygen, incorporation of two atoms of oxygen	3/ 445	45/ 29474	0.066666666666667	0.030390954132835	0.71878788765549	HORVU.MOREX.r3.3HG0320900;HORVU.MOREX.r3.4HG0335790;HORVU.MOREX.r3.7HG0679840
5	GO:0051336	BP	regulation of hydrolase activity	5/ 445	104/ 29474	0.048076923076923	0.020888050514756	0.73123764899045	HORVU.MOREX.r3.1HG0004310;HORVU.MOREX.r3.1HG0066680;HORVU.MOREX.r3.3HG0222380;HORVU.MOREX.r3.3HG0222570;HORVU.MOREX.r3.5HG0524850
1	GO:0005655	CC	nucleolar ribonuclease P complex	1/ 445	2/ 29474	0.5	0.029968658384816	0.74664771747314	HORVU.MOREX.r3.4HG0361950
1	GO:0032586	CC	protein storage vacuole membrane	1/ 445	2/ 29474	0.5	0.029968658384816	0.74664771747314	HORVU.MOREX.r3.1HG0046190
1	GO:0030681	CC	multimeric ribonuclease P complex	1/ 445	2/ 29474	0.5	0.029968658384816	0.74664771747314	HORVU.MOREX.r3.4HG0361950
4	GO:0140115	BP	export across plasma membrane	4/ 445	70/ 29474	0.057142857142857	0.021514209172445	0.74757892761436	HORVU.MOREX.r3.1HG0084890;HORVU.MOREX.r3.3HG0291400;HORVU.MOREX.r3.4HG0334970;HORVU.MOREX.r3.6HG0630650
2	GO:0047834	MF	D-threo-aldose 1-dehydrogenase activity	2/ 445	19/ 29474	0.10526315789474	0.032829779318613	0.76941064621258	HORVU.MOREX.r3.1HG0071540;HORVU.MOREX.r3.2HG0171740
4	GO:0016799	MF	hydrolase activity, hydrolyzing N-glycosyl compounds	4/ 445	81/ 29474	0.049382716049383	0.034365249343387	0.79200367592437	HORVU.MOREX.r3.1HG0074440;HORVU.MOREX.r3.2HG0216340;HORVU.MOREX.r3.5HG0525790;HORVU.MOREX.r3.7HG0685280
29	GO:1901575	BP	organic substance catabolic process	29/ 445	1257/ 29474	0.023070803500398	0.023925191479227	0.82524318550775	HORVU.MOREX.r3.1HG0074250;HORVU.MOREX.r3.2HG0097360;HORVU.MOREX.r3.2HG0138320;HORVU.MOREX.r3.2HG0138340;HORVU.MOREX.r3.2HG0181700;HORVU.MOREX.r3.2HG0203800;HORVU.MOREX.r3.3HG0222560;HORVU.MOREX.r3.3HG0222570;HORVU.MOREX.r3.3HG0236660;HORVU.MOREX.r3.3HG0287610;HORVU.MOREX.r3.3HG0303220;HORVU.MOREX.r3.3HG0307850;HORVU.MOREX.r3.3HG0320900;HORVU.MOREX.r3.4HG0379300;HORVU.MOREX.r3.4HG0393690;HORVU.MOR…	limit dextrinase
22	GO:0019752	BP	carboxylic acid metabolic process	22/ 445	895/ 29474	0.024581005586592	0.024896315758295	0.84020587929612	HORVU.MOREX.r3.2HG0139380;HORVU.MOREX.r3.2HG0142030;HORVU.MOREX.r3.2HG0176940;HORVU.MOREX.r3.2HG0181700;HORVU.MOREX.r3.3HG0231180;HORVU.MOREX.r3.3HG0236660;HORVU.MOREX.r3.3HG0287610;HORVU.MOREX.r3.3HG0288030;HORVU.MOREX.r3.3HG0292600;HORVU.MOREX.r3.3HG0320040;HORVU.MOREX.r3.4HG0335790;HORVU.MOREX.r3.4HG0361660;HORVU.MOREX.r3.4HG0379300;HORVU.MOREX.r3.4HG0393690;HORVU.MOREX.r3.4HG0395940;HORVU.MOR…
22	GO:0043436	BP	oxoacid metabolic process	22/ 445	906/ 29474	0.024282560706402	0.026530668713084	0.85721327123886	HORVU.MOREX.r3.2HG0139380;HORVU.MOREX.r3.2HG0142030;HORVU.MOREX.r3.2HG0176940;HORVU.MOREX.r3.2HG0181700;HORVU.MOREX.r3.3HG0231180;HORVU.MOREX.r3.3HG0236660;HORVU.MOREX.r3.3HG0287610;HORVU.MOREX.r3.3HG0288030;HORVU.MOREX.r3.3HG0292600;HORVU.MOREX.r3.3HG0320040;HORVU.MOREX.r3.4HG0335790;HORVU.MOREX.r3.4HG0361660;HORVU.MOREX.r3.4HG0379300;HORVU.MOREX.r3.4HG0393690;HORVU.MOREX.r3.4HG0395940;HORVU.MOR…
10	GO:0006790	BP	sulfur compound metabolic process	10/ 445	304/ 29474	0.032894736842105	0.027442024841951	0.85721327123886	HORVU.MOREX.r3.1HG0066370;HORVU.MOREX.r3.1HG0090010;HORVU.MOREX.r3.2HG0142030;HORVU.MOREX.r3.3HG0292600;HORVU.MOREX.r3.3HG0311650;HORVU.MOREX.r3.3HG0315580;HORVU.MOREX.r3.4HG0395940;HORVU.MOREX.r3.5HG0496620;HORVU.MOREX.r3.7HG0646210;HORVU.MOREX.r3.7HG0686880
8	GO:0051172	BP	negative regulation of nitrogen compound metabolic process	8/ 445	236/ 29474	0.033898305084746	0.027631927348303	0.85721327123886	HORVU.MOREX.r3.1HG0004310;HORVU.MOREX.r3.1HG0066680;HORVU.MOREX.r3.2HG0216340;HORVU.MOREX.r3.3HG0222380;HORVU.MOREX.r3.3HG0222570;HORVU.MOREX.r3.5HG0524850;HORVU.MOREX.r3.5HG0525790;HORVU.MOREX.r3.7HG0685280
4	GO:0006757	BP	ATP generation from ADP	4/ 445	76/ 29474	0.052631578947368	0.028078605103968	0.85721327123886	HORVU.MOREX.r3.3HG0236660;HORVU.MOREX.r3.3HG0287610;HORVU.MOREX.r3.4HG0379300;HORVU.MOREX.r3.7HG0647190
4	GO:0006096	BP	glycolytic process	4/ 445	76/ 29474	0.052631578947368	0.028078605103968	0.85721327123886	HORVU.MOREX.r3.3HG0236660;HORVU.MOREX.r3.3HG0287610;HORVU.MOREX.r3.4HG0379300;HORVU.MOREX.r3.7HG0647190
4	GO:0046031	BP	ADP metabolic process	4/ 445	76/ 29474	0.052631578947368	0.028078605103968	0.85721327123886	HORVU.MOREX.r3.3HG0236660;HORVU.MOREX.r3.3HG0287610;HORVU.MOREX.r3.4HG0379300;HORVU.MOREX.r3.7HG0647190
13	GO:0044262	BP	cellular carbohydrate metabolic process	13/ 445	452/ 29474	0.028761061946903	0.028719987552922	0.85721327123886	HORVU.MOREX.r3.1HG0052720;HORVU.MOREX.r3.2HG0138320;HORVU.MOREX.r3.2HG0138340;HORVU.MOREX.r3.2HG0139380;HORVU.MOREX.r3.2HG0176940;HORVU.MOREX.r3.2HG0197610;HORVU.MOREX.r3.3HG0233990;HORVU.MOREX.r3.3HG0288960;HORVU.MOREX.r3.3HG0307850;HORVU.MOREX.r3.4HG0334850;HORVU.MOREX.r3.4HG0379300;HORVU.MOREX.r3.7HG0656620;HORVU.MOREX.r3.7HG0717870	starch synthase IIIblimit dextrinase
4	GO:0009135	BP	purine nucleoside diphosphate metabolic process	4/ 445	77/ 29474	0.051948051948052	0.029276058606246	0.85721327123886	HORVU.MOREX.r3.3HG0236660;HORVU.MOREX.r3.3HG0287610;HORVU.MOREX.r3.4HG0379300;HORVU.MOREX.r3.7HG0647190
4	GO:0009179	BP	purine ribonucleoside diphosphate metabolic process	4/ 445	77/ 29474	0.051948051948052	0.029276058606246	0.85721327123886	HORVU.MOREX.r3.3HG0236660;HORVU.MOREX.r3.3HG0287610;HORVU.MOREX.r3.4HG0379300;HORVU.MOREX.r3.7HG0647190
2	GO:0006002	BP	fructose 6-phosphate metabolic process	2/ 445	18/ 29474	0.11111111111111	0.029665291671597	0.85721327123886	HORVU.MOREX.r3.3HG0236660;HORVU.MOREX.r3.3HG0287610
2	GO:0043255	BP	regulation of carbohydrate biosynthetic process	2/ 445	18/ 29474	0.11111111111111	0.029665291671597	0.85721327123886	HORVU.MOREX.r3.1HG0076260;HORVU.MOREX.r3.4HG0334850
1	GO:0009133	BP	nucleoside diphosphate biosynthetic process	1/ 445	2/ 29474	0.5	0.029968658384816	0.85721327123886	HORVU.MOREX.r3.3HG0243310
1	GO:0010492	BP	maintenance of shoot apical meristem identity	1/ 445	2/ 29474	0.5	0.029968658384816	0.85721327123886	HORVU.MOREX.r3.2HG0189750
1	GO:0080006	BP	internode patterning	1/ 445	2/ 29474	0.5	0.029968658384816	0.85721327123886	HORVU.MOREX.r3.5HG0515900
1	GO:0006007	BP	glucose catabolic process	1/ 445	2/ 29474	0.5	0.029968658384816	0.85721327123886	HORVU.MOREX.r3.4HG0379300
1	GO:0070898	BP	RNA polymerase III preinitiation complex assembly	1/ 445	2/ 29474	0.5	0.029968658384816	0.85721327123886	HORVU.MOREX.r3.1HG0068660
1	GO:0009139	BP	pyrimidine nucleoside diphosphate biosynthetic process	1/ 445	2/ 29474	0.5	0.029968658384816	0.85721327123886	HORVU.MOREX.r3.3HG0243310
1	GO:0033477	BP	S-methylmethionine metabolic process	1/ 445	2/ 29474	0.5	0.029968658384816	0.85721327123886	HORVU.MOREX.r3.3HG0292600
1	GO:0070212	BP	protein poly-ADP-ribosylation	1/ 445	2/ 29474	0.5	0.029968658384816	0.85721327123886	HORVU.MOREX.r3.1HG0078590	poly(ADP-ribose) polymerase
1	GO:0009138	BP	pyrimidine nucleoside diphosphate metabolic process	1/ 445	2/ 29474	0.5	0.029968658384816	0.85721327123886	HORVU.MOREX.r3.3HG0243310
1	GO:0033528	BP	S-methylmethionine cycle	1/ 445	2/ 29474	0.5	0.029968658384816	0.85721327123886	HORVU.MOREX.r3.3HG0292600
1	GO:0090227	BP	regulation of red or far-red light signaling pathway	1/ 445	2/ 29474	0.5	0.029968658384816	0.85721327123886	HORVU.MOREX.r3.5HG0515900
2	GO:0050734	MF	hydroxycinnamoyltransferase activity	2/ 445	21/ 29474	0.095238095238095	0.039530961705514	0.86365101082047	HORVU.MOREX.r3.2HG0097350;HORVU.MOREX.r3.6HG0627420
2	GO:0005384	MF	manganese ion transmembrane transporter activity	2/ 445	22/ 29474	0.090909090909091	0.043058773793651	0.87800060624269	HORVU.MOREX.r3.3HG0303160;HORVU.MOREX.r3.4HG0393950
3	GO:0051537	MF	2 iron, 2 sulfur cluster binding	3/ 445	52/ 29474	0.057692307692308	0.043850220468759	0.87800060624269	HORVU.MOREX.r3.1HG0090010;HORVU.MOREX.r3.5HG0476490;HORVU.MOREX.r3.7HG0743420
1	GO:0070492	MF	oligosaccharide binding	1/ 445	3/ 29474	0.33333333333333	0.044615236391696	0.87800060624269	HORVU.MOREX.r3.4HG0334850
1	GO:0003839	MF	gamma-glutamylcyclotransferase activity	1/ 445	3/ 29474	0.33333333333333	0.044615236391696	0.87800060624269	HORVU.MOREX.r3.7HG0686880
1	GO:0004802	MF	transketolase activity	1/ 445	3/ 29474	0.33333333333333	0.044615236391696	0.87800060624269	HORVU.MOREX.r3.2HG0106830
1	GO:0010340	MF	carboxyl-O-methyltransferase activity	1/ 445	3/ 29474	0.33333333333333	0.044615236391696	0.87800060624269	HORVU.MOREX.r3.2HG0176030
1	GO:0016034	MF	maleylacetoacetate isomerase activity	1/ 445	3/ 29474	0.33333333333333	0.044615236391696	0.87800060624269	HORVU.MOREX.r3.5HG0496620
1	GO:0016636	MF	oxidoreductase activity, acting on the CH-CH group of donors, iron-sulfur protein as acceptor	1/ 445	3/ 29474	0.33333333333333	0.044615236391696	0.87800060624269	HORVU.MOREX.r3.3HG0320040
1	GO:0051998	MF	protein carboxyl O-methyltransferase activity	1/ 445	3/ 29474	0.33333333333333	0.044615236391696	0.87800060624269	HORVU.MOREX.r3.2HG0176030
1	GO:0004473	MF	malate dehydrogenase (decarboxylating) (NADP+) activity	1/ 445	3/ 29474	0.33333333333333	0.044615236391696	0.87800060624269	HORVU.MOREX.r3.3HG0288030
1	GO:0046537	MF	2,3-bisphosphoglycerate-independent phosphoglycerate mutase activity	1/ 445	3/ 29474	0.33333333333333	0.044615236391696	0.87800060624269	HORVU.MOREX.r3.4HG0379300
1	GO:0042972	MF	licheninase activity	1/ 445	3/ 29474	0.33333333333333	0.044615236391696	0.87800060624269	HORVU.MOREX.r3.1HG0059470
5	GO:0009250	BP	glucan biosynthetic process	5/ 445	117/ 29474	0.042735042735043	0.032554692380629	0.92553976943959	HORVU.MOREX.r3.1HG0052720;HORVU.MOREX.r3.2HG0197610;HORVU.MOREX.r3.3HG0288960;HORVU.MOREX.r3.4HG0334850;HORVU.MOREX.r3.7HG0656620	starch synthase IIIblimit dextrinase
6	GO:0140825	MF	lactoperoxidase activity	6/ 445	174/ 29474	0.03448275862069	0.049168971330955	0.95306472249024	HORVU.MOREX.r3.1HG0017620;HORVU.MOREX.r3.2HG0112560;HORVU.MOREX.r3.2HG0112610;HORVU.MOREX.r3.2HG0120360;HORVU.MOREX.r3.2HG0207080;HORVU.MOREX.r3.3HG0325540
3	GO:0006081	BP	cellular aldehyde metabolic process	3/ 445	48/ 29474	0.0625	0.035847779695624	0.96821795556841	HORVU.MOREX.r3.2HG0139380;HORVU.MOREX.r3.2HG0176940;HORVU.MOREX.r3.4HG0406790
6	GO:0044036	BP	cell wall macromolecule metabolic process	6/ 445	161/ 29474	0.037267080745342	0.035914448094082	0.96821795556841	HORVU.MOREX.r3.2HG0138320;HORVU.MOREX.r3.2HG0138340;HORVU.MOREX.r3.3HG0233990;HORVU.MOREX.r3.3HG0307850;HORVU.MOREX.r3.7HG0751740;HORVU.MOREX.r3.7HG0751750
2	GO:0010675	BP	regulation of cellular carbohydrate metabolic process	2/ 445	20/ 29474	0.1	0.036119834198352	0.96821795556841	HORVU.MOREX.r3.1HG0076260;HORVU.MOREX.r3.4HG0334850
2	GO:0046348	BP	amino sugar catabolic process	2/ 445	20/ 29474	0.1	0.036119834198352	0.96821795556841	HORVU.MOREX.r3.7HG0751740;HORVU.MOREX.r3.7HG0751750
2	GO:0006032	BP	chitin catabolic process	2/ 445	20/ 29474	0.1	0.036119834198352	0.96821795556841	HORVU.MOREX.r3.7HG0751740;HORVU.MOREX.r3.7HG0751750
2	GO:0006026	BP	aminoglycan catabolic process	2/ 445	20/ 29474	0.1	0.036119834198352	0.96821795556841	HORVU.MOREX.r3.7HG0751740;HORVU.MOREX.r3.7HG0751750
2	GO:2000022	BP	regulation of jasmonic acid mediated signaling pathway	2/ 445	20/ 29474	0.1	0.036119834198352	0.96821795556841	HORVU.MOREX.r3.1HG0074250;HORVU.MOREX.r3.5HG0480600
2	GO:0006030	BP	chitin metabolic process	2/ 445	20/ 29474	0.1	0.036119834198352	0.96821795556841	HORVU.MOREX.r3.7HG0751740;HORVU.MOREX.r3.7HG0751750
2	GO:1901072	BP	glucosamine-containing compound catabolic process	2/ 445	20/ 29474	0.1	0.036119834198352	0.96821795556841	HORVU.MOREX.r3.7HG0751740;HORVU.MOREX.r3.7HG0751750
4	GO:0006165	BP	nucleoside diphosphate phosphorylation	4/ 445	83/ 29474	0.048192771084337	0.037090440316955	0.97747896363391	HORVU.MOREX.r3.3HG0236660;HORVU.MOREX.r3.3HG0287610;HORVU.MOREX.r3.4HG0379300;HORVU.MOREX.r3.7HG0647190
4	GO:0030003	BP	cellular cation homeostasis	4/ 445	83/ 29474	0.048192771084337	0.037090440316955	0.97747896363391	HORVU.MOREX.r3.1HG0090010;HORVU.MOREX.r3.3HG0303160;HORVU.MOREX.r3.4HG0334970;HORVU.MOREX.r3.7HG0675240
5	GO:0043086	BP	negative regulation of catalytic activity	5/ 445	122/ 29474	0.040983606557377	0.037937645549384	0.99422064397855	HORVU.MOREX.r3.1HG0004310;HORVU.MOREX.r3.1HG0066680;HORVU.MOREX.r3.3HG0222380;HORVU.MOREX.r3.3HG0222570;HORVU.MOREX.r3.5HG0524850
1	GO:0000126	CC	transcription factor TFIIIB complex	1/ 445	3/ 29474	0.33333333333333	0.044615236391696	0.99755092650151	HORVU.MOREX.r3.1HG0068660
1	GO:0032578	CC	aleurone grain membrane	1/ 445	3/ 29474	0.33333333333333	0.044615236391696	0.99755092650151	HORVU.MOREX.r3.3HG0288690
4	GO:0046939	BP	nucleotide phosphorylation	4/ 445	84/ 29474	0.047619047619048	0.038498344859181	1	HORVU.MOREX.r3.3HG0236660;HORVU.MOREX.r3.3HG0287610;HORVU.MOREX.r3.4HG0379300;HORVU.MOREX.r3.7HG0647190
3	GO:1990961	BP	xenobiotic detoxification by transmembrane export across the plasma membrane	3/ 445	50/ 29474	0.06	0.039746233638375	1	HORVU.MOREX.r3.1HG0084890;HORVU.MOREX.r3.3HG0291400;HORVU.MOREX.r3.6HG0630650
3	GO:0046618	BP	xenobiotic export from cell	3/ 445	50/ 29474	0.06	0.039746233638375	1	HORVU.MOREX.r3.1HG0084890;HORVU.MOREX.r3.3HG0291400;HORVU.MOREX.r3.6HG0630650
5	GO:0044092	BP	negative regulation of molecular function	5/ 445	125/ 29474	0.04	0.041413564894638	1	HORVU.MOREX.r3.1HG0004310;HORVU.MOREX.r3.1HG0066680;HORVU.MOREX.r3.3HG0222380;HORVU.MOREX.r3.3HG0222570;HORVU.MOREX.r3.5HG0524850
16	GO:0009628	BP	response to abiotic stimulus	16/ 445	614/ 29474	0.026058631921824	0.041567796334213	1	HORVU.MOREX.r3.2HG0140970;HORVU.MOREX.r3.3HG0227920;HORVU.MOREX.r3.3HG0248140;HORVU.MOREX.r3.3HG0276710;HORVU.MOREX.r3.3HG0283230;HORVU.MOREX.r3.3HG0288960;HORVU.MOREX.r3.4HG0339950;HORVU.MOREX.r3.5HG0507390;HORVU.MOREX.r3.5HG0507410;HORVU.MOREX.r3.5HG0511090;HORVU.MOREX.r3.5HG0516830;HORVU.MOREX.r3.6HG0548110;HORVU.MOREX.r3.6HG0554840;HORVU.MOREX.r3.6HG0622760;HORVU.MOREX.r3.6HG0622770;HORVU.MOR…	Dhn6Dhn1DHN4
3	GO:0000097	BP	sulfur amino acid biosynthetic process	3/ 445	51/ 29474	0.058823529411765	0.04177271275788	1	HORVU.MOREX.r3.2HG0142030;HORVU.MOREX.r3.3HG0292600;HORVU.MOREX.r3.4HG0395940
5	GO:0046395	BP	carboxylic acid catabolic process	5/ 445	126/ 29474	0.03968253968254	0.042613579703469	1	HORVU.MOREX.r3.2HG0181700;HORVU.MOREX.r3.4HG0393690;HORVU.MOREX.r3.5HG0481320;HORVU.MOREX.r3.5HG0496620;HORVU.MOREX.r3.6HG0575740
9	GO:0044264	BP	cellular polysaccharide metabolic process	9/ 445	285/ 29474	0.031578947368421	0.042837674493017	1	HORVU.MOREX.r3.1HG0052720;HORVU.MOREX.r3.2HG0138320;HORVU.MOREX.r3.2HG0138340;HORVU.MOREX.r3.2HG0197610;HORVU.MOREX.r3.3HG0233990;HORVU.MOREX.r3.3HG0288960;HORVU.MOREX.r3.3HG0307850;HORVU.MOREX.r3.4HG0334850;HORVU.MOREX.r3.7HG0656620	starch synthase IIIblimit dextrinase
2	GO:0030641	BP	regulation of cellular pH	2/ 445	22/ 29474	0.090909090909091	0.043058773793651	1	HORVU.MOREX.r3.4HG0334970;HORVU.MOREX.r3.7HG0675240
2	GO:0051453	BP	regulation of intracellular pH	2/ 445	22/ 29474	0.090909090909091	0.043058773793651	1	HORVU.MOREX.r3.4HG0334970;HORVU.MOREX.r3.7HG0675240
1	GO:0010236	BP	plastoquinone biosynthetic process	1/ 445	3/ 29474	0.33333333333333	0.044615236391696	1	HORVU.MOREX.r3.7HG0735250
1	GO:0097437	BP	maintenance of dormancy	1/ 445	3/ 29474	0.33333333333333	0.044615236391696	1	HORVU.MOREX.r3.5HG0527840
1	GO:0009584	BP	detection of visible light	1/ 445	3/ 29474	0.33333333333333	0.044615236391696	1	HORVU.MOREX.r3.5HG0511090
1	GO:0051202	BP	phytochromobilin metabolic process	1/ 445	3/ 29474	0.33333333333333	0.044615236391696	1	HORVU.MOREX.r3.3HG0320040
1	GO:2000652	BP	regulation of secondary cell wall biogenesis	1/ 445	3/ 29474	0.33333333333333	0.044615236391696	1	HORVU.MOREX.r3.3HG0279110
1	GO:0034389	BP	lipid droplet organization	1/ 445	3/ 29474	0.33333333333333	0.044615236391696	1	HORVU.MOREX.r3.4HG0355410
1	GO:0019755	BP	one-carbon compound transport	1/ 445	3/ 29474	0.33333333333333	0.044615236391696	1	HORVU.MOREX.r3.3HG0249180
1	GO:0050826	BP	response to freezing	1/ 445	3/ 29474	0.33333333333333	0.044615236391696	1	HORVU.MOREX.r3.7HG0677170
1	GO:0015840	BP	urea transport	1/ 445	3/ 29474	0.33333333333333	0.044615236391696	1	HORVU.MOREX.r3.3HG0249180
1	GO:0010024	BP	phytochromobilin biosynthetic process	1/ 445	3/ 29474	0.33333333333333	0.044615236391696	1	HORVU.MOREX.r3.3HG0320040
1	GO:0140042	BP	lipid droplet formation	1/ 445	3/ 29474	0.33333333333333	0.044615236391696	1	HORVU.MOREX.r3.4HG0355410
1	GO:0010231	BP	maintenance of seed dormancy	1/ 445	3/ 29474	0.33333333333333	0.044615236391696	1	HORVU.MOREX.r3.5HG0527840
1	GO:0006567	BP	threonine catabolic process	1/ 445	3/ 29474	0.33333333333333	0.044615236391696	1	HORVU.MOREX.r3.2HG0181700
3	GO:0042908	BP	xenobiotic transport	3/ 445	53/ 29474	0.056603773584906	0.045978370166254	1	HORVU.MOREX.r3.1HG0084890;HORVU.MOREX.r3.3HG0291400;HORVU.MOREX.r3.6HG0630650
3	GO:0009067	BP	aspartate family amino acid biosynthetic process	3/ 445	53/ 29474	0.056603773584906	0.045978370166254	1	HORVU.MOREX.r3.3HG0231180;HORVU.MOREX.r3.3HG0292600;HORVU.MOREX.r3.4HG0395940
2	GO:0042542	BP	response to hydrogen peroxide	2/ 445	23/ 29474	0.08695652173913	0.04669898679402	1	HORVU.MOREX.r3.2HG0140970;HORVU.MOREX.r3.2HG0176250
7	GO:0044042	BP	glucan metabolic process	7/ 445	218/ 29474	0.032110091743119	0.048393365218646	1	HORVU.MOREX.r3.1HG0052720;HORVU.MOREX.r3.2HG0197610;HORVU.MOREX.r3.3HG0233990;HORVU.MOREX.r3.3HG0288960;HORVU.MOREX.r3.4HG0334850;HORVU.MOREX.r3.5HG0510640;HORVU.MOREX.r3.7HG0656620	starch synthase IIIblimit dextrinase
