# Supplementary material for: Transcriptomic insights into grain size development in naked barley (Hordeum vulgare L. var. nudum Hook. f): based on weighted gene co-expression network analysis
Source: PeerJ. 2025 Aug 8;13:e19856. doi: 10.7717/peerj.19856 (PMC12338054; doi:10.7717/peerj.19856)
Supplement: Supplemental Information 7 [file peerj-13-19856-s007.xlsx]

## Sheet: Sheet1
Supplementary table 7 KEGG enrichment analysis
Number	Pathway ID	Description	Database	Ratio_in_study	Ratio_in_pop	Rich factor	Pvalue	Padjust	First Category	Second Category	Gene_ids	Gene_names
9	map00460	Cyanoamino acid metabolism	KEGG PATHWAY	9/ 189	81/ 12954	0.11111111111111	2.6140499157E-6	0.000188211593931	Metabolism	Metabolism of other amino acids	HORVU.MOREX.r3.1HG0060360|HORVU.MOREX.r3.3HG0312880|HORVU.MOREX.r3.5HG0495360|HORVU.MOREX.r3.5HG0510640|HORVU.MOREX.r3.2HG0204260|HORVU.MOREX.r3.2HG0117660|HORVU.MOREX.r3.2HG0205890|HORVU.MOREX.r3.2HG0181510|HORVU.MOREX.r3.2HG0204250	;;;;;beta-glucosidase;;;
8	map00999	Biosynthesis of various plant secondary metabolites	KEGG PATHWAY	8/ 189	105/ 12954	0.076190476190476	0.000147655121501	0.00531558437405	Metabolism	Biosynthesis of other secondary metabolites	HORVU.MOREX.r3.1HG0060360|HORVU.MOREX.r3.3HG0312880|HORVU.MOREX.r3.5HG0495360|HORVU.MOREX.r3.5HG0510640|HORVU.MOREX.r3.2HG0117660|HORVU.MOREX.r3.2HG0205890|HORVU.MOREX.r3.2HG0171740|HORVU.MOREX.r3.2HG0181510	;;;;beta-glucosidase;;;
10	map00500	Starch and sucrose metabolism	KEGG PATHWAY	10/ 189	210/ 12954	0.047619047619048	0.00102719092645	0.0246525822349	Metabolism	Carbohydrate metabolism	HORVU.MOREX.r3.1HG0060360|HORVU.MOREX.r3.3HG0312880|HORVU.MOREX.r3.4HG0417260|HORVU.MOREX.r3.4HG0412150|HORVU.MOREX.r3.5HG0495360|HORVU.MOREX.r3.5HG0510640|HORVU.MOREX.r3.2HG0205890|HORVU.MOREX.r3.2HG0117660|HORVU.MOREX.r3.2HG0197610|HORVU.MOREX.r3.2HG0181510	;;;;;;;beta-glucosidase;starch synthase IIIb;
5	map00250	Alanine, aspartate and glutamate metabolism	KEGG PATHWAY	5/ 189	67/ 12954	0.074626865671642	0.00291404410071	0.0524527938128	Metabolism	Amino acid metabolism	HORVU.MOREX.r3.4HG0393690|HORVU.MOREX.r3.5HG0481320|HORVU.MOREX.r3.2HG0204260|HORVU.MOREX.r3.2HG0204250|HORVU.MOREX.r3.3HG0231180	;;;;
5	map00052	Galactose metabolism	KEGG PATHWAY	5/ 189	76/ 12954	0.065789473684211	0.00501877653983	0.0722703821735	Metabolism	Carbohydrate metabolism	HORVU.MOREX.r3.1HG0095170|HORVU.MOREX.r3.3HG0287610|HORVU.MOREX.r3.4HG0380970|HORVU.MOREX.r3.3HG0236660|HORVU.MOREX.r3.2HG0109700	;;;;
6	map00620	Pyruvate metabolism	KEGG PATHWAY	6/ 189	121/ 12954	0.049586776859504	0.00858051494677	0.102966	Metabolism	Carbohydrate metabolism	HORVU.MOREX.r3.1HG0071540|HORVU.MOREX.r3.3HG0288030|HORVU.MOREX.r3.1HG0082960|HORVU.MOREX.r3.2HG0176940|HORVU.MOREX.r3.7HG0709970|HORVU.MOREX.r3.4HG0406790	;;ADH4;;;
7	map00010	Glycolysis / Gluconeogenesis	KEGG PATHWAY	7/ 189	174/ 12954	0.040229885057471	0.0138964606899	0.142935	Metabolism	Carbohydrate metabolism	HORVU.MOREX.r3.7HG0647190|HORVU.MOREX.r3.1HG0071540|HORVU.MOREX.r3.1HG0082960|HORVU.MOREX.r3.3HG0236660|HORVU.MOREX.r3.4HG0379300|HORVU.MOREX.r3.3HG0287610|HORVU.MOREX.r3.4HG0406790	;;ADH4;;;;
4	map00350	Tyrosine metabolism	KEGG PATHWAY	4/ 189	68/ 12954	0.058823529411765	0.0173148423649	0.155834	Metabolism	Amino acid metabolism	HORVU.MOREX.r3.4HG0361660|HORVU.MOREX.r3.5HG0496620|HORVU.MOREX.r3.1HG0082960|HORVU.MOREX.r3.4HG0406790	;;ADH4;
9	map00940	Phenylpropanoid biosynthesis	KEGG PATHWAY	9/ 189	285/ 12954	0.031578947368421	0.0240504199243	0.192403	Metabolism	Biosynthesis of other secondary metabolites	HORVU.MOREX.r3.2HG0112560|HORVU.MOREX.r3.2HG0112610|HORVU.MOREX.r3.1HG0017620|HORVU.MOREX.r3.7HG0728980|HORVU.MOREX.r3.5HG0468580|HORVU.MOREX.r3.3HG0325540|HORVU.MOREX.r3.2HG0207080|HORVU.MOREX.r3.2HG0120360|HORVU.MOREX.r3.7HG0747690	;;;;;;;;
4	map02010	ABC transporters	KEGG PATHWAY	4/ 189	92/ 12954	0.043478260869565	0.0455310374612	0.327823	Environmental Information Processing	Membrane transport	HORVU.MOREX.r3.2HG0103630|HORVU.MOREX.r3.6HG0558970|HORVU.MOREX.r3.3HG0282510|HORVU.MOREX.r3.3HG0282640	;;;
3	map00030	Pentose phosphate pathway	KEGG PATHWAY	3/ 189	57/ 12954	0.052631578947368	0.0503932	0.329846	Metabolism	Carbohydrate metabolism	HORVU.MOREX.r3.2HG0106830|HORVU.MOREX.r3.3HG0287610|HORVU.MOREX.r3.3HG0236660	;;
2	map00430	Taurine and hypotaurine metabolism	KEGG PATHWAY	2/ 189	28/ 12954	0.071428571428571	0.0624800473162	0.346043	Metabolism	Metabolism of other amino acids	HORVU.MOREX.r3.4HG0393690|HORVU.MOREX.r3.2HG0103940	;
2	map00591	Linoleic acid metabolism	KEGG PATHWAY	2/ 189	27/ 12954	0.074074074074074	0.0585641357761	0.351385	Metabolism	Lipid metabolism	HORVU.MOREX.r3.4HG0335790|HORVU.MOREX.r3.7HG0679840	;
2	map00904	Diterpenoid biosynthesis	KEGG PATHWAY	2/ 189	33/ 12954	0.060606060606061	0.0832886	0.428341	Metabolism	Metabolism of terpenoids and polyketides	HORVU.MOREX.r3.3HG0289810|HORVU.MOREX.r3.7HG0751260	;CPSL1
5	map00520	Amino sugar and nucleotide sugar metabolism	KEGG PATHWAY	5/ 189	177/ 12954	0.028248587570621	0.117259	0.527665	Metabolism	Carbohydrate metabolism	HORVU.MOREX.r3.2HG0138340|HORVU.MOREX.r3.1HG0095170|HORVU.MOREX.r3.7HG0751750|HORVU.MOREX.r3.2HG0138320|HORVU.MOREX.r3.7HG0751740	;;;;
4	map00710	Carbon fixation in photosynthetic organisms	KEGG PATHWAY	4/ 189	133/ 12954	0.030075187969925	0.129958	0.550408	Metabolism	Energy metabolism	HORVU.MOREX.r3.5HG0481320|HORVU.MOREX.r3.2HG0106830|HORVU.MOREX.r3.7HG0709970|HORVU.MOREX.r3.3HG0288030	;;;
2	map00960	Tropane, piperidine and pyridine alkaloid biosynthesis	KEGG PATHWAY	2/ 189	40/ 12954	0.05	0.115305	0.553464	Metabolism	Biosynthesis of other secondary metabolites	HORVU.MOREX.r3.4HG0361660|HORVU.MOREX.r3.3HG0312910	;
3	map00053	Ascorbate and aldarate metabolism	KEGG PATHWAY	3/ 189	92/ 12954	0.032608695652174	0.15102	0.60408	Metabolism	Carbohydrate metabolism	HORVU.MOREX.r3.1HG0071540|HORVU.MOREX.r3.6HG0607810|HORVU.MOREX.r3.7HG0717870	;;
2	map00073	Cutin, suberine and wax biosynthesis	KEGG PATHWAY	2/ 189	50/ 12954	0.04	0.165217	0.626086	Metabolism	Lipid metabolism	HORVU.MOREX.r3.4HG0395710|HORVU.MOREX.r3.2HG0181160	;
5	map04016	MAPK signaling pathway - plant	KEGG PATHWAY	5/ 189	214/ 12954	0.023364485981308	0.203242	0.636235	Environmental Information Processing	Signal transduction	HORVU.MOREX.r3.7HG0751740|HORVU.MOREX.r3.7HG0751750|HORVU.MOREX.r3.1HG0057490|HORVU.MOREX.r3.6HG0610830|HORVU.MOREX.r3.4HG0342860	;;;;
1	map00944	Flavone and flavonol biosynthesis	KEGG PATHWAY	1/ 189	14/ 12954	0.071428571428571	0.186061	0.637924	Metabolism	Biosynthesis of other secondary metabolites	HORVU.MOREX.r3.4HG0392670
4	map00270	Cysteine and methionine metabolism	KEGG PATHWAY	4/ 189	151/ 12954	0.026490066225166	0.179153	0.64495	Metabolism	Amino acid metabolism	HORVU.MOREX.r3.4HG0361660|HORVU.MOREX.r3.1HG0021960|HORVU.MOREX.r3.4HG0395940|HORVU.MOREX.r3.3HG0292600	;;;
2	map00941	Flavonoid biosynthesis	KEGG PATHWAY	2/ 189	57/ 12954	0.035087719298246	0.202016	0.661145	Metabolism	Biosynthesis of other secondary metabolites	HORVU.MOREX.r3.4HG0392670|HORVU.MOREX.r3.7HG0747690	;
1	map00965	Betalain biosynthesis	KEGG PATHWAY	1/ 189	19/ 12954	0.052631578947368	0.2438	0.702144	Metabolism	Biosynthesis of other secondary metabolites	HORVU.MOREX.r3.3HG0298030
2	map00020	Citrate cycle (TCA cycle)	KEGG PATHWAY	2/ 189	63/ 12954	0.031746031746032	0.234229	0.702686	Metabolism	Carbohydrate metabolism	HORVU.MOREX.r3.5HG0476490|HORVU.MOREX.r3.7HG0674600	;
1	map00906	Carotenoid biosynthesis	KEGG PATHWAY	1/ 189	37/ 12954	0.027027027027027	0.41991	0.719846	Metabolism	Metabolism of terpenoids and polyketides	HORVU.MOREX.r3.7HG0743420
2	map00051	Fructose and mannose metabolism	KEGG PATHWAY	2/ 189	70/ 12954	0.028571428571429	0.272136	0.725696	Metabolism	Carbohydrate metabolism	HORVU.MOREX.r3.3HG0287610|HORVU.MOREX.r3.3HG0236660	;
2	map00040	Pentose and glucuronate interconversions	KEGG PATHWAY	2/ 189	97/ 12954	0.020618556701031	0.414986	0.728756	Metabolism	Carbohydrate metabolism	HORVU.MOREX.r3.5HG0522870|HORVU.MOREX.r3.1HG0071540	;
1	map00740	Riboflavin metabolism	KEGG PATHWAY	1/ 189	24/ 12954	0.041666666666667	0.297463	0.738529	Metabolism	Metabolism of cofactors and vitamins	HORVU.MOREX.r3.3HG0315580
1	map00730	Thiamine metabolism	KEGG PATHWAY	1/ 189	25/ 12954	0.04	0.307732	0.738558	Metabolism	Metabolism of cofactors and vitamins	HORVU.MOREX.r3.3HG0315580
2	map00260	Glycine, serine and threonine metabolism	KEGG PATHWAY	2/ 189	69/ 12954	0.028985507246377	0.266715	0.738595	Metabolism	Amino acid metabolism	HORVU.MOREX.r3.2HG0181700|HORVU.MOREX.r3.4HG0379300	;
1	map00950	Isoquinoline alkaloid biosynthesis	KEGG PATHWAY	1/ 189	36/ 12954	0.027777777777778	0.411297	0.740335	Metabolism	Biosynthesis of other secondary metabolites	HORVU.MOREX.r3.4HG0361660
1	map00100	Steroid biosynthesis	KEGG PATHWAY	1/ 189	45/ 12954	0.022222222222222	0.484452	0.742139	Metabolism	Lipid metabolism	HORVU.MOREX.r3.4HG0347570
1	map00220	Arginine biosynthesis	KEGG PATHWAY	1/ 189	35/ 12954	0.028571428571429	0.402557	0.743182	Metabolism	Amino acid metabolism	HORVU.MOREX.r3.5HG0481320
8	map04075	Plant hormone signal transduction	KEGG PATHWAY	8/ 189	467/ 12954	0.017130620985011	0.37275	0.745499	Environmental Information Processing	Signal transduction	HORVU.MOREX.r3.1HG0057490|HORVU.MOREX.r3.1HG0054940|HORVU.MOREX.r3.5HG0515900|HORVU.MOREX.r3.6HG0610830|HORVU.MOREX.r3.5HG0480600|HORVU.MOREX.r3.5HG0509120|HORVU.MOREX.r3.4HG0342860|HORVU.MOREX.r3.1HG0074250	;;;;;;;
3	map00630	Glyoxylate and dicarboxylate metabolism	KEGG PATHWAY	3/ 189	129/ 12954	0.023255813953488	0.291033	0.74837	Metabolism	Carbohydrate metabolism	HORVU.MOREX.r3.2HG0176940|HORVU.MOREX.r3.2HG0139380|HORVU.MOREX.r3.7HG0674600	;;
2	map00561	Glycerolipid metabolism	KEGG PATHWAY	2/ 189	110/ 12954	0.018181818181818	0.478905	0.749591	Metabolism	Lipid metabolism	HORVU.MOREX.r3.3HG0303220|HORVU.MOREX.r3.1HG0071540	;
3	map00480	Glutathione metabolism	KEGG PATHWAY	3/ 189	148/ 12954	0.02027027027027	0.366898	0.754761	Metabolism	Metabolism of other amino acids	HORVU.MOREX.r3.7HG0686880|HORVU.MOREX.r3.3HG0311650|HORVU.MOREX.r3.1HG0066370	;;
3	map03018	RNA degradation	KEGG PATHWAY	3/ 189	156/ 12954	0.019230769230769	0.398562	0.755169	Genetic Information Processing	Folding, sorting and degradation	HORVU.MOREX.r3.7HG0647190|HORVU.MOREX.r3.3HG0287610|HORVU.MOREX.r3.3HG0236660	;;
2	map00071	Fatty acid degradation	KEGG PATHWAY	2/ 189	82/ 12954	0.024390243902439	0.336795	0.757788	Metabolism	Lipid metabolism	HORVU.MOREX.r3.1HG0082960|HORVU.MOREX.r3.4HG0406790	ADH4;
1	map00650	Butanoate metabolism	KEGG PATHWAY	1/ 189	29/ 12954	0.03448275862069	0.347337	0.757826	Metabolism	Carbohydrate metabolism	HORVU.MOREX.r3.4HG0393690
1	map00790	Folate biosynthesis	KEGG PATHWAY	1/ 189	27/ 12954	0.037037037037037	0.327825	0.761399	Metabolism	Metabolism of cofactors and vitamins	HORVU.MOREX.r3.7HG0736870
2	map00592	alpha-Linolenic acid metabolism	KEGG PATHWAY	2/ 189	93/ 12954	0.021505376344086	0.394539	0.767751	Metabolism	Lipid metabolism	HORVU.MOREX.r3.1HG0082960|HORVU.MOREX.r3.7HG0679840	ADH4;
3	map04144	Endocytosis	KEGG PATHWAY	3/ 189	189/ 12954	0.015873015873016	0.523032	0.768536	Cellular Processes	Transport and catabolism	HORVU.MOREX.r3.4HG0387610|HORVU.MOREX.r3.4HG0392880|HORVU.MOREX.r3.5HG0498130	;;
1	map00400	Phenylalanine, tyrosine and tryptophan biosynthesis	KEGG PATHWAY	1/ 189	49/ 12954	0.020408163265306	0.513991	0.770987	Metabolism	Amino acid metabolism	HORVU.MOREX.r3.4HG0361660
1	map00130	Ubiquinone and other terpenoid-quinone biosynthesis	KEGG PATHWAY	1/ 189	64/ 12954	0.015625	0.610525	0.77119	Metabolism	Metabolism of cofactors and vitamins	HORVU.MOREX.r3.4HG0361660
1	map00410	beta-Alanine metabolism	KEGG PATHWAY	1/ 189	59/ 12954	0.016949152542373	0.580679	0.774238	Metabolism	Metabolism of other amino acids	HORVU.MOREX.r3.4HG0393690
1	map00945	Stilbenoid, diarylheptanoid and gingerol biosynthesis	KEGG PATHWAY	1/ 189	31/ 12954	0.032258064516129	0.366286	0.775664	Metabolism	Biosynthesis of other secondary metabolites	HORVU.MOREX.r3.7HG0747690
1	map00240	Pyrimidine metabolism	KEGG PATHWAY	1/ 189	67/ 12954	0.014925373134328	0.627409	0.778852	Metabolism	Nucleotide metabolism	HORVU.MOREX.r3.3HG0243310
1	map03410	Base excision repair	KEGG PATHWAY	1/ 189	44/ 12954	0.022727272727273	0.476792	0.780206	Genetic Information Processing	Replication and repair	HORVU.MOREX.r3.1HG0078590	poly(ADP-ribose) polymerase
1	map00640	Propanoate metabolism	KEGG PATHWAY	1/ 189	44/ 12954	0.022727272727273	0.476792	0.780206	Metabolism	Carbohydrate metabolism	HORVU.MOREX.r3.5HG0453670
1	map00900	Terpenoid backbone biosynthesis	KEGG PATHWAY	1/ 189	62/ 12954	0.016129032258065	0.598849	0.783948	Metabolism	Metabolism of terpenoids and polyketides	HORVU.MOREX.r3.7HG0735250
1	map00360	Phenylalanine metabolism	KEGG PATHWAY	1/ 189	62/ 12954	0.016129032258065	0.598849	0.783948	Metabolism	Amino acid metabolism	HORVU.MOREX.r3.4HG0361660
1	map00770	Pantothenate and CoA biosynthesis	KEGG PATHWAY	1/ 189	43/ 12954	0.023255813953488	0.469019	0.785335	Metabolism	Metabolism of cofactors and vitamins	HORVU.MOREX.r3.6HG0554840
1	map00920	Sulfur metabolism	KEGG PATHWAY	1/ 189	58/ 12954	0.017241379310345	0.574442	0.795381	Metabolism	Energy metabolism	HORVU.MOREX.r3.2HG0142030
1	map01040	Biosynthesis of unsaturated fatty acids	KEGG PATHWAY	1/ 189	58/ 12954	0.017241379310345	0.574442	0.795381	Metabolism	Lipid metabolism	HORVU.MOREX.r3.7HG0674260
1	map00280	Valine, leucine and isoleucine degradation	KEGG PATHWAY	1/ 189	57/ 12954	0.017543859649123	0.568113	0.802042	Metabolism	Amino acid metabolism	HORVU.MOREX.r3.5HG0453670
1	map00860	Porphyrin metabolism	KEGG PATHWAY	1/ 189	56/ 12954	0.017857142857143	0.56169	0.808834	Metabolism	Metabolism of cofactors and vitamins	HORVU.MOREX.r3.3HG0320040
1	map00562	Inositol phosphate metabolism	KEGG PATHWAY	1/ 189	74/ 12954	0.013513513513514	0.664025	0.810336	Metabolism	Carbohydrate metabolism	HORVU.MOREX.r3.7HG0717870
1	map03440	Homologous recombination	KEGG PATHWAY	1/ 189	84/ 12954	0.011904761904762	0.71021	0.82476	Genetic Information Processing	Replication and repair	HORVU.MOREX.r3.5HG0508640
1	map03420	Nucleotide excision repair	KEGG PATHWAY	1/ 189	82/ 12954	0.01219512195122	0.701508	0.84181	Genetic Information Processing	Replication and repair	HORVU.MOREX.r3.3HG0227920
1	map00062	Fatty acid elongation	KEGG PATHWAY	1/ 189	82/ 12954	0.01219512195122	0.701508	0.84181	Metabolism	Lipid metabolism	HORVU.MOREX.r3.7HG0674260
1	map03008	Ribosome biogenesis in eukaryotes	KEGG PATHWAY	1/ 189	95/ 12954	0.010526315789474	0.753747	0.861426	Genetic Information Processing	Translation	HORVU.MOREX.r3.4HG0361950
1	map04145	Phagosome	KEGG PATHWAY	1/ 189	113/ 12954	0.0088495575221239	0.811395	0.912819	Cellular Processes	Transport and catabolism	HORVU.MOREX.r3.7HG0667150
3	map04141	Protein processing in endoplasmic reticulum	KEGG PATHWAY	3/ 189	313/ 12954	0.0095846645367412	0.839194	0.929569	Genetic Information Processing	Folding, sorting and degradation	HORVU.MOREX.r3.4HG0387610|HORVU.MOREX.r3.3HG0225510|HORVU.MOREX.r3.2HG0140970	;;
3	map04626	Plant-pathogen interaction	KEGG PATHWAY	3/ 189	329/ 12954	0.0091185410334346	0.862793	0.941229	Organismal Systems	Environmental adaptation	HORVU.MOREX.r3.3HG0322070|HORVU.MOREX.r3.7HG0685970|HORVU.MOREX.r3.2HG0131510	;;
1	map03015	mRNA surveillance pathway	KEGG PATHWAY	1/ 189	147/ 12954	0.0068027210884354	0.886153	0.952284	Genetic Information Processing	Translation	HORVU.MOREX.r3.7HG0708040
1	map00195	Photosynthesis	KEGG PATHWAY	1/ 189	164/ 12954	0.0060975609756098	0.911593	0.965217	Metabolism	Energy metabolism	HORVU.MOREX.r3.7HG0737140
2	map00190	Oxidative phosphorylation	KEGG PATHWAY	2/ 189	551/ 12954	0.0036297640653358	0.997577	0.997577	Metabolism	Energy metabolism	HORVU.MOREX.r3.5HG0476490|HORVU.MOREX.r3.4HG0334970	;
1	map03010	Ribosome	KEGG PATHWAY	1/ 189	285/ 12954	0.0035087719298246	0.985531	0.999412	Genetic Information Processing	Translation	HORVU.MOREX.r3.UnG0753820
1	map03040	Spliceosome	KEGG PATHWAY	1/ 189	229/ 12954	0.0043668122270742	0.966491	1	Genetic Information Processing	Transcription	HORVU.MOREX.r3.4HG0387610
1	map04120	Ubiquitin mediated proteolysis	KEGG PATHWAY	1/ 189	261/ 12954	0.0038314176245211	0.979254	1	Genetic Information Processing	Folding, sorting and degradation	HORVU.MOREX.r3.3HG0227920
