# Supplementary material for: Transcriptomic insights into grain size development in naked barley (Hordeum vulgare L. var. nudum Hook. f): based on weighted gene co-expression network analysis
Source: PeerJ. 2025 Aug 8;13:e19856. doi: 10.7717/peerj.19856 (PMC12338054; doi:10.7717/peerj.19856)
Supplement: Supplemental Information 8 [file peerj-13-19856-s008.xlsx]

## Sheet: Sheet1
Seven candidate genes
IDs
HORVU.MOREX.r3.7HG0675510
HORVU.MOREX.r3.7HG063781
HORVU.MOREX.r3.7HG0647190
HORVU.MOREX.r3.2HG0142030
HORVU.MOREX.r3.2HG0191620
HORVU.MOREX.r3.2HG0131510
HORVU.MOREX.r3.1HG0049040
