# Supplementary material for: Transcriptomic insights into grain size development in naked barley (Hordeum vulgare L. var. nudum Hook. f): based on weighted gene co-expression network analysis
Source: PeerJ. 2025 Aug 8;13:e19856. doi: 10.7717/peerj.19856 (PMC12338054; doi:10.7717/peerj.19856)
Supplement: Supplemental Information 9 [file peerj-13-19856-s009.xlsx]

## Sheet: HORVU.MOREX.r3.7HG0637810
reference gene（18s)				Target gene
Sample name	Target name	CT Value	Mean CT value of reference gene	Sample name	Target name	CT Value	∆CT＝Target CT-Reference CT	Mean	∆∆CT=Target ∆CT-Reference CT	2-∆∆CT	Mean
S-1-1	HORVU.MOREX.r3.7HG0637810	17.79	17.7	S-1-1	HORVU.MOREX.r3.7HG0637810	21.16	3.46		0.316667	0.802923
S-1-2	HORVU.MOREX.r3.7HG0637810	17.68		S-1-2	HORVU.MOREX.r3.7HG0637810	20.58	2.88		-0.263333	1.20025
S-1-3	HORVU.MOREX.r3.7HG0637810	17.63		S-1-3	HORVU.MOREX.r3.7HG0637810	20.79	3.09	3.14333	-0.0533333	1.03766	1.01361
S-2-1	HORVU.MOREX.r3.7HG0637810	18.62	18.5767	S-2-1	HORVU.MOREX.r3.7HG0637810	19.21	0.633333		-2.51	5.6962
S-2-2	HORVU.MOREX.r3.7HG0637810	18.5		S-2-2	HORVU.MOREX.r3.7HG0637810	19.44	0.863333		-2.28	4.85678
S-2-3	HORVU.MOREX.r3.7HG0637810	18.61		S-2-3	HORVU.MOREX.r3.7HG0637810	19.28	0.703333		-2.44	5.42642	5.32647
S-3-1	HORVU.MOREX.r3.7HG0637810	22.76	22.59	S-3-1	HORVU.MOREX.r3.7HG0637810	17.9	-4.69		-7.83333	228.07
S-3-2	HORVU.MOREX.r3.7HG0637810	22.73		S-3-2	HORVU.MOREX.r3.7HG0637810	17.85	-4.74		-7.88333	236.113
S-3-3	HORVU.MOREX.r3.7HG0637810	22.28		S-3-3	HORVU.MOREX.r3.7HG0637810	17.87	-4.72		-7.86333	232.862	232.348
reference gene（18s)				Target gene
Sample name	Target name	CT Value	Mean CT value of reference gene	Sample name	Target name	CT Value	∆CT＝Target CT-Reference CT	Mean	∆∆CT=Target ∆CT-Reference CT	2-∆∆CT	Mean
L-1-1	HORVU.MOREX.r3.7HG0637810	19.3	19.04	352-1-1	HORVU.MOREX.r3.7HG0637810	20.91	1.87		-0.476667	1.39152
L-1-2	HORVU.MOREX.r3.7HG0637810	18.99		352-1-2	HORVU.MOREX.r3.7HG0637810	21.46	2.42		0.0733333	0.950439
L-1-3	HORVU.MOREX.r3.7HG0637810	18.83		352-1-3	HORVU.MOREX.r3.7HG0637810	21.79	2.75	2.34667	0.403333	0.756109	1.03269
L-2-1	HORVU.MOREX.r3.7HG0637810	19.39	19.6867	352-2-1	HORVU.MOREX.r3.7HG0637810	34.93	15.2433		12.8967	0.000131134
L-2-2	HORVU.MOREX.r3.7HG0637810	19.7		352-2-2	HORVU.MOREX.r3.7HG0637810	34.85	15.1633		12.8167	0.000138611
L-2-3	HORVU.MOREX.r3.7HG0637810	19.97		352-2-3	HORVU.MOREX.r3.7HG0637810	34.1	14.4133		12.0667	0.000233116	0.00016762
L-3-1	HORVU.MOREX.r3.7HG0637810	20.88	20.9167	352-3-1	HORVU.MOREX.r3.7HG0637810	19.96	-0.956667		-3.30333	9.87194
L-3-2	HORVU.MOREX.r3.7HG0637810	20.86		352-3-2	HORVU.MOREX.r3.7HG0637810	20.2	-0.716667		-3.06333	8.35902
L-3-3	HORVU.MOREX.r3.7HG0637810	21.01		352-3-3	HORVU.MOREX.r3.7HG0637810	19.84	-1.07667		-3.42333	10.7282	9.65304

## Sheet: HORVU.MOREX.r3.1HG0049040
reference gene（18s)					Target gene
Sample name	Target name	CT Value	Mean CT value of reference gene		Sample name	Target name	CT Value	∆CT＝Target CT-Reference CT	Mean	∆∆CT=Target ∆CT-Reference CT	2-∆∆CT	Mean
S-1-1	HORVU.MOREX.r3.1HG0049040	17.79	17.7		S-1-1	HORVU.MOREX.r3.1HG0049040	18.97	1.27		-0.506667	1.42076
S-1-2	HORVU.MOREX.r3.1HG0049040	17.68			S-1-2	HORVU.MOREX.r3.1HG0049040	19.63	1.93		0.153333	0.899171
S-1-3	HORVU.MOREX.r3.1HG0049040	17.63			S-1-3	HORVU.MOREX.r3.1HG0049040	19.83	2.13	1.77667	0.353333	0.782773	1.03424
S-2-1	HORVU.MOREX.r3.1HG0049040	18.62	18.5767		S-2-1	HORVU.MOREX.r3.1HG0049040	15.86	-2.71667		-4.49333	22.5231
S-2-2	HORVU.MOREX.r3.1HG0049040	18.5			S-2-2	HORVU.MOREX.r3.1HG0049040	15.99	-2.58667		-4.36333	20.5823
S-2-3	HORVU.MOREX.r3.1HG0049040	18.61			S-2-3	HORVU.MOREX.r3.1HG0049040	15.72	-2.85667		-4.63333	24.8183	22.6412
S-3-1	HORVU.MOREX.r3.1HG0049040	22.76	22.59		S-3-1	HORVU.MOREX.r3.1HG0049040	17.6	-4.99		-6.76667	108.885
S-3-2	HORVU.MOREX.r3.1HG0049040	22.73			S-3-2	HORVU.MOREX.r3.1HG0049040	17.82	-4.77		-6.54667	93.4852
S-3-3	HORVU.MOREX.r3.1HG0049040	22.28			S-3-3	HORVU.MOREX.r3.1HG0049040	18.31	-4.28		-6.05667	66.5638	89.6448
reference gene（18s)					Target gene
Sample name	Target name	CT Value	Mean CT value of reference gene		Sample name	Target name	CT Value	∆CT＝Target CT-Reference CT	Mean	∆∆CT=Target ∆CT-Reference CT	2-∆∆CT	Mean
L-1-1	HORVU.MOREX.r3.1HG0049040	19.3	19.04		352-1-1	HORVU.MOREX.r3.1HG0049040	19.84	0.8		-0.0633333	1.04488
L-1-2	HORVU.MOREX.r3.1HG0049040	18.99			352-1-2	HORVU.MOREX.r3.1HG0049040	19.72	0.68		-0.183333	1.1355
L-1-3	HORVU.MOREX.r3.1HG0049040	18.83			352-1-3	HORVU.MOREX.r3.1HG0049040	20.15	1.11	0.863333	0.246667	0.842842	1.00774
L-2-1	HORVU.MOREX.r3.1HG0049040	19.39	19.6867		352-2-1	HORVU.MOREX.r3.1HG0049040	18.64	-1.04667		-1.91	3.75809
L-2-2	HORVU.MOREX.r3.1HG0049040	19.7			352-2-2	HORVU.MOREX.r3.1HG0049040	18.56	-1.12667		-1.99	3.97237
L-2-3	HORVU.MOREX.r3.1HG0049040	19.97			352-2-3	HORVU.MOREX.r3.1HG0049040	18.47	-1.21667		-2.08	4.22807	3.98618
L-3-1	HORVU.MOREX.r3.1HG0049040	20.88	20.9167		352-3-1	HORVU.MOREX.r3.1HG0049040	19.56	-1.35667		-2.22	4.65893
L-3-2	HORVU.MOREX.r3.1HG0049040	20.86			352-3-2	HORVU.MOREX.r3.1HG0049040	19.57	-1.34667		-2.21	4.62675
L-3-3	HORVU.MOREX.r3.1HG0049040	21.01			352-3-3	HORVU.MOREX.r3.1HG0049040	19.72	-1.19667		-2.06	4.16986	4.48518

## Sheet: HORVU.MOREX.r3.7HG0647190
reference gene（18s)					Target gene
Sample name	Target name	CT Value	Mean CT value of reference gene		Sample name	Target name	CT Value	∆CT＝Target CT-Reference CT	Mean	∆∆CT=Target ∆CT-Reference CT	2-∆∆CT	Mean
S-1-1	HORVU.MOREX.r3.7HG0647190	17.79	17.7		S-1-1	HORVU.MOREX.r3.7HG0647190	34.16	16.46		0	1
S-1-2	HORVU.MOREX.r3.7HG0647190	17.68			S-1-2	HORVU.MOREX.r3.7HG0647190	33.94	16.24		-0.22	1.16473
S-1-3	HORVU.MOREX.r3.7HG0647190	17.63			S-1-3	HORVU.MOREX.r3.7HG0647190	34.38	16.68	16.46	0.22	0.858565	1.00777
S-2-1	HORVU.MOREX.r3.7HG0647190	18.62	18.5767		S-2-1	HORVU.MOREX.r3.7HG0647190	17.26	-1.31667		-17.7767	224548
S-2-2	HORVU.MOREX.r3.7HG0647190	18.5			S-2-2	HORVU.MOREX.r3.7HG0647190	16.95	-1.62667		-18.0867	278374
S-2-3	HORVU.MOREX.r3.7HG0647190	18.61			S-2-3	HORVU.MOREX.r3.7HG0647190	16.47	-2.10667		-18.5667	388261	297061
S-3-1	HORVU.MOREX.r3.7HG0647190	22.76	22.59		S-3-1	HORVU.MOREX.r3.7HG0647190	18.97	-3.62		-20.08	1.10836e+06
S-3-2	HORVU.MOREX.r3.7HG0647190	22.73			S-3-2	HORVU.MOREX.r3.7HG0647190	18.9	-3.69		-20.15	1.16347e+06
S-3-3	HORVU.MOREX.r3.7HG0647190	22.28			S-3-3	HORVU.MOREX.r3.7HG0647190	19.58	-3.01		-19.47	726196	999343
reference gene（18s)					Target gene
Sample name	Target name	CT Value	Mean CT value of reference gene		Sample name	Target name	CT Value	∆CT＝Target CT-Reference CT	Mean	∆∆CT=Target ∆CT-Reference CT	2-∆∆CT	Mean
L-1-1	HORVU.MOREX.r3.7HG0647190	19.3	19.04		352-1-1	HORVU.MOREX.r3.7HG0647190	26.98	7.94		0.0733333	0.950439
L-1-2	HORVU.MOREX.r3.7HG0647190	18.99			352-1-2	HORVU.MOREX.r3.7HG0647190	26.8	7.76		-0.106667	1.07674
L-1-3	HORVU.MOREX.r3.7HG0647190	18.83			352-1-3	HORVU.MOREX.r3.7HG0647190	26.94	7.9	7.86667	0.0333333	0.97716	1.00145
L-2-1	HORVU.MOREX.r3.7HG0647190	19.39	19.6867		352-2-1	HORVU.MOREX.r3.7HG0647190	15.99	-3.69667		-11.5633	3026.29
L-2-2	HORVU.MOREX.r3.7HG0647190	19.7			352-2-2	HORVU.MOREX.r3.7HG0647190	15.67	-4.01667		-11.8833	3777.81
L-2-3	HORVU.MOREX.r3.7HG0647190	19.97			352-2-3	HORVU.MOREX.r3.7HG0647190	15.57	-4.11667		-11.9833	4048.95	3617.68
L-3-1	HORVU.MOREX.r3.7HG0647190	20.88	20.9167		352-3-1	HORVU.MOREX.r3.7HG0647190	17.31	-3.60667		-11.4733	2843.27
L-3-2	HORVU.MOREX.r3.7HG0647190	20.86			352-3-2	HORVU.MOREX.r3.7HG0647190	16.9	-4.01667		-11.8833	3777.81
L-3-3	HORVU.MOREX.r3.7HG0647190	21.01			352-3-3	HORVU.MOREX.r3.7HG0647190	16.77	-4.14667		-12.0133	4134.03	3585.03

## Sheet: HORVU.MOREX.r3.7HG0675510
reference gene（18s)					Target gene
Sample name	Target name	CT Value	Mean CT value of reference gene		Sample name	Target name	CT Value	∆CT＝Target CT-Reference CT	Mean	∆∆CT=Target ∆CT-Reference CT	2-∆∆CT	Mean
S-1-1	HORVU.MOREX.r3.7HG0675510	17.79	17.7		S-1-1	HORVU.MOREX.r3.7HG0675510	26.42	8.72		-0.0266667	1.01866
S-1-2	HORVU.MOREX.r3.7HG0675510	17.68			S-1-2	HORVU.MOREX.r3.7HG0675510	26.58	8.88		0.133333	0.911722
S-1-3	HORVU.MOREX.r3.7HG0675510	17.63			S-1-3	HORVU.MOREX.r3.7HG0675510	26.34	8.64	8.74667	-0.106667	1.07674	1.00237
S-2-1	HORVU.MOREX.r3.7HG0675510	18.62	18.5767		S-2-1	HORVU.MOREX.r3.7HG0675510	19.79	1.21333		-7.53333	185.25
S-2-2	HORVU.MOREX.r3.7HG0675510	18.5			S-2-2	HORVU.MOREX.r3.7HG0675510	19.67	1.09333		-7.65333	201.318
S-2-3	HORVU.MOREX.r3.7HG0675510	18.61			S-2-3	HORVU.MOREX.r3.7HG0675510	19.42	0.843333		-7.90333	239.409	208.659
S-3-1	HORVU.MOREX.r3.7HG0675510	22.76	22.59		S-3-1	HORVU.MOREX.r3.7HG0675510	21.57	-1.02		-9.76667	871.083
S-3-2	HORVU.MOREX.r3.7HG0675510	22.73			S-3-2	HORVU.MOREX.r3.7HG0675510	21.89	-0.7		-9.44667	697.798
S-3-3	HORVU.MOREX.r3.7HG0675510	22.28			S-3-3	HORVU.MOREX.r3.7HG0675510	21.55	-1.04		-9.78667	883.243	817.375
reference gene（18s)					Target gene
Sample name	Target name	CT Value	Mean CT value of reference gene		Sample name	Target name	CT Value	∆CT＝Target CT-Reference CT	Mean	∆∆CT=Target ∆CT-Reference CT	2-∆∆CT	Mean
L-1-1	HORVU.MOREX.r3.7HG0675510	19.3	19.04		352-1-1	HORVU.MOREX.r3.7HG0675510	26.51	7.47		0.383333	0.766664
L-1-2	HORVU.MOREX.r3.7HG0675510	18.99			352-1-2	HORVU.MOREX.r3.7HG0675510	25.91	6.87		-0.216667	1.16205
L-1-3	HORVU.MOREX.r3.7HG0675510	18.83			352-1-3	HORVU.MOREX.r3.7HG0675510	25.96	6.92	7.08667	-0.166667	1.12246	1.01706
L-2-1	HORVU.MOREX.r3.7HG0675510	19.39	19.6867		352-2-1	HORVU.MOREX.r3.7HG0675510	17.71	-1.97667		-9.06333	534.977
L-2-2	HORVU.MOREX.r3.7HG0675510	19.7			352-2-2	HORVU.MOREX.r3.7HG0675510	17.66	-2.02667		-9.11333	553.843
L-2-3	HORVU.MOREX.r3.7HG0675510	19.97			352-2-3	HORVU.MOREX.r3.7HG0675510	17.37	-2.31667		-9.40333	677.151	588.657
L-3-1	HORVU.MOREX.r3.7HG0675510	20.88	20.9167		352-3-1	HORVU.MOREX.r3.7HG0675510	18.24	-2.67667		-9.76333	869.073
L-3-2	HORVU.MOREX.r3.7HG0675510	20.86			352-3-2	HORVU.MOREX.r3.7HG0675510	18.57	-2.34667		-9.43333	691.379
L-3-3	HORVU.MOREX.r3.7HG0675510	21.01			352-3-3	HORVU.MOREX.r3.7HG0675510	18.35	-2.56667		-9.65333	805.273	788.575

## Sheet: HORVU.MOREX.r3.2HG0142030
reference gene（18s)					Target gene
Sample name	Target name	CT Value	Mean CT value of reference gene		Sample name	Target name	CT Value	∆CT＝Target CT-Reference CT	Mean	∆∆CT=Target ∆CT-Reference CT	2-∆∆CT	Mean
S-1-1	HORVU.MOREX.r3.2HG0142030	17.79	17.7		S-1-1	HORVU.MOREX.r3.2HG0142030	22.38	4.68		0.00333333	0.997692
S-1-2	HORVU.MOREX.r3.2HG0142030	17.68			S-1-2	HORVU.MOREX.r3.2HG0142030	22.52	4.82		0.143333	0.905425
S-1-3	HORVU.MOREX.r3.2HG0142030	17.63			S-1-3	HORVU.MOREX.r3.2HG0142030	22.23	4.53	4.67667	-0.146667	1.10701	1.00338
S-2-1	HORVU.MOREX.r3.2HG0142030	18.62	18.5767		S-2-1	HORVU.MOREX.r3.2HG0142030	25.66	7.08333		2.40667	0.188591
S-2-2	HORVU.MOREX.r3.2HG0142030	18.5			S-2-2	HORVU.MOREX.r3.2HG0142030	25.79	7.21333		2.53667	0.17234
S-2-3	HORVU.MOREX.r3.2HG0142030	18.61			S-2-3	HORVU.MOREX.r3.2HG0142030	25.26	6.68333		2.00667	0.248847	0.20326
S-3-1	HORVU.MOREX.r3.2HG0142030	22.76	22.59		S-3-1	HORVU.MOREX.r3.2HG0142030	25.3	2.71		-1.96667	3.90864
S-3-2	HORVU.MOREX.r3.2HG0142030	22.73			S-3-2	HORVU.MOREX.r3.2HG0142030	25.77	3.18		-1.49667	2.8219
S-3-3	HORVU.MOREX.r3.2HG0142030	22.28			S-3-3	HORVU.MOREX.r3.2HG0142030	26.46	3.87		-0.806667	1.74917	2.82657
reference gene（18s)					Target gene
Sample name	Target name	CT Value	Mean CT value of reference gene		Sample name	Target name	CT Value	∆CT＝Target CT-Reference CT	Mean	∆∆CT=Target ∆CT-Reference CT	2-∆∆CT	Mean
L-1-1	HORVU.MOREX.r3.2HG0142030	19.3	19.04		352-1-1	HORVU.MOREX.r3.2HG0142030	21.53	2.49		0.06	0.959264
L-1-2	HORVU.MOREX.r3.2HG0142030	18.99			352-1-2	HORVU.MOREX.r3.2HG0142030	21.46	2.42		-0.01	1.00696
L-1-3	HORVU.MOREX.r3.2HG0142030	18.83			352-1-3	HORVU.MOREX.r3.2HG0142030	21.42	2.38	2.43	-0.05	1.03526	1.00049
L-2-1	HORVU.MOREX.r3.2HG0142030	19.39	19.6867		352-2-1	HORVU.MOREX.r3.2HG0142030	27.42	7.73333		5.30333	0.0253243
L-2-2	HORVU.MOREX.r3.2HG0142030	19.7			352-2-2	HORVU.MOREX.r3.2HG0142030	27.3	7.61333		5.18333	0.0275208
L-2-3	HORVU.MOREX.r3.2HG0142030	19.97			352-2-3	HORVU.MOREX.r3.2HG0142030	27.33	7.64333		5.21333	0.0269544	0.0265999
L-3-1	HORVU.MOREX.r3.2HG0142030	20.88	20.9167		352-3-1	HORVU.MOREX.r3.2HG0142030	26.38	5.46333		3.03333	0.122145
L-3-2	HORVU.MOREX.r3.2HG0142030	20.86			352-3-2	HORVU.MOREX.r3.2HG0142030	25.77	4.85333		2.42333	0.186425
L-3-3	HORVU.MOREX.r3.2HG0142030	21.01			352-3-3	HORVU.MOREX.r3.2HG0142030	26.47	5.55333		3.12333	0.114758	0.141109

## Sheet: HORVU.MOREX.r3.2HG0191620
reference gene（18s)					Target gene
Sample name	Target name	CT Value	Mean CT value of reference gene		Sample name	Target name	CT Value	∆CT＝Target CT-Reference CT	Mean	∆∆CT=Target ∆CT-Reference CT	2-∆∆CT	Mean
S-1-1	HORVU.MOREX.r3.2HG0191620	17.79	17.7		S-1-1	HORVU.MOREX.r3.2HG0191620	19.36	1.66		-0.0933333	1.06683
S-1-2	HORVU.MOREX.r3.2HG0191620	17.68			S-1-2	HORVU.MOREX.r3.2HG0191620	19.46	1.76		0.00666667	0.99539
S-1-3	HORVU.MOREX.r3.2HG0191620	17.63			S-1-3	HORVU.MOREX.r3.2HG0191620	19.54	1.84	1.75333	0.0866667	0.941696	1.00131
S-2-1	HORVU.MOREX.r3.2HG0191620	18.62	18.5767		S-2-1	HORVU.MOREX.r3.2HG0191620	15.57	-3.00667		-4.76	27.0958
S-2-2	HORVU.MOREX.r3.2HG0191620	18.5			S-2-2	HORVU.MOREX.r3.2HG0191620	15.49	-3.08667		-4.84	28.6408
S-2-3	HORVU.MOREX.r3.2HG0191620	18.61			S-2-3	HORVU.MOREX.r3.2HG0191620	15.37	-3.20667		-4.96	31.125	28.9539
S-3-1	HORVU.MOREX.r3.2HG0191620	22.76	22.59		S-3-1	HORVU.MOREX.r3.2HG0191620	19.37	-3.22		-4.97333	31.4139
S-3-2	HORVU.MOREX.r3.2HG0191620	22.73			S-3-2	HORVU.MOREX.r3.2HG0191620	19.26	-3.33		-5.08333	33.9028
S-3-3	HORVU.MOREX.r3.2HG0191620	22.28			S-3-3	HORVU.MOREX.r3.2HG0191620	19.49	-3.1		-4.85333	28.9067	31.4078
reference gene（18s)					Target gene
Sample name	Target name	CT Value	Mean CT value of reference gene		Sample name	Target name	CT Value	∆CT＝Target CT-Reference CT	Mean	∆∆CT=Target ∆CT-Reference CT	2-∆∆CT	Mean
L-1-1	HORVU.MOREX.r3.2HG0191620	19.3	19.04		352-1-1	HORVU.MOREX.r3.2HG0191620	19.95	0.91		0.0366667	0.974905
L-1-2	HORVU.MOREX.r3.2HG0191620	18.99			352-1-2	HORVU.MOREX.r3.2HG0191620	19.9	0.86		-0.0133333	1.00928
L-1-3	HORVU.MOREX.r3.2HG0191620	18.83			352-1-3	HORVU.MOREX.r3.2HG0191620	19.89	0.85	0.873333	-0.0233333	1.0163	1.00016
L-2-1	HORVU.MOREX.r3.2HG0191620	19.39	19.6867		352-2-1	HORVU.MOREX.r3.2HG0191620	17.63	-2.05667		-2.93	7.6211
L-2-2	HORVU.MOREX.r3.2HG0191620	19.7			352-2-2	HORVU.MOREX.r3.2HG0191620	17.55	-2.13667		-3.01	8.05564
L-2-3	HORVU.MOREX.r3.2HG0191620	19.97			352-2-3	HORVU.MOREX.r3.2HG0191620	17.68	-2.00667		-2.88	7.3615	7.67942
L-3-1	HORVU.MOREX.r3.2HG0191620	20.88	20.9167		352-3-1	HORVU.MOREX.r3.2HG0191620	17.3	-3.61667		-4.49	22.4711
L-3-2	HORVU.MOREX.r3.2HG0191620	20.86			352-3-2	HORVU.MOREX.r3.2HG0191620	17.6	-3.31667		-4.19	18.2522
L-3-3	HORVU.MOREX.r3.2HG0191620	21.01			352-3-3	HORVU.MOREX.r3.2HG0191620	17.67	-3.24667		-4.12	17.3878	19.3704

## Sheet: HORVU.MOREX.r3.2HG0131510
reference gene（18s)					Target gene
Sample name	Target name	CT Value	Mean CT value of reference gene		Sample name	Target name	CT Value	∆CT＝Target CT-Reference CT	Mean	∆∆CT=Target ∆CT-Reference CT	2-∆∆CT	Mean
S-1-1	HORVU.MOREX.r3.2HG0131510	17.79	17.7		S-1-1	HORVU.MOREX.r3.2HG0131510	17.48	-0.22		-0.00333333	1.00231
S-1-2	HORVU.MOREX.r3.2HG0131510	17.68			S-1-2	HORVU.MOREX.r3.2HG0131510	17.57	-0.13		0.0866667	0.941696
S-1-3	HORVU.MOREX.r3.2HG0131510	17.63			S-1-3	HORVU.MOREX.r3.2HG0131510	17.4	-0.3	-0.216667	-0.0833333	1.05946	1.00116
S-2-1	HORVU.MOREX.r3.2HG0131510	18.62	18.5767		S-2-1	HORVU.MOREX.r3.2HG0131510	21.86	3.28333		3.5	0.0883883
S-2-2	HORVU.MOREX.r3.2HG0131510	18.5			S-2-2	HORVU.MOREX.r3.2HG0131510	20.99	2.41333		2.63	0.161544
S-2-3	HORVU.MOREX.r3.2HG0131510	18.61			S-2-3	HORVU.MOREX.r3.2HG0131510	20.72	2.14333		2.36	0.194791	0.148241
S-3-1	HORVU.MOREX.r3.2HG0131510	22.76	22.59		S-3-1	HORVU.MOREX.r3.2HG0131510	22.73	0.14		0.356667	0.780967
S-3-2	HORVU.MOREX.r3.2HG0131510	22.73			S-3-2	HORVU.MOREX.r3.2HG0131510	22.56	-0.03		0.186667	0.878633
S-3-3	HORVU.MOREX.r3.2HG0131510	22.28			S-3-3	HORVU.MOREX.r3.2HG0131510	22.49	-0.1		0.116667	0.922316	0.860639
reference gene（18s)					Target gene
Sample name	Target name	CT Value	Mean CT value of reference gene		Sample name	Target name	CT Value	∆CT＝Target CT-Reference CT	Mean	∆∆CT=Target ∆CT-Reference CT	2-∆∆CT	Mean
L-1-1	HORVU.MOREX.r3.2HG0131510	19.3	19.04		352-1-1	HORVU.MOREX.r3.2HG0131510	18.56	-0.48		0.03	0.97942
L-1-2	HORVU.MOREX.r3.2HG0131510	18.99			352-1-2	HORVU.MOREX.r3.2HG0131510	18.49	-0.55		-0.04	1.02811
L-1-3	HORVU.MOREX.r3.2HG0131510	18.83			352-1-3	HORVU.MOREX.r3.2HG0131510	18.54	-0.5	-0.51	0.01	0.993092	1.00021
L-2-1	HORVU.MOREX.r3.2HG0131510	19.39	19.6867		352-2-1	HORVU.MOREX.r3.2HG0131510	22.88	3.19333		3.70333	0.0767689
L-2-2	HORVU.MOREX.r3.2HG0131510	19.7			352-2-2	HORVU.MOREX.r3.2HG0131510	22.9	3.21333		3.72333	0.075712
L-2-3	HORVU.MOREX.r3.2HG0131510	19.97			352-2-3	HORVU.MOREX.r3.2HG0131510	22.68	2.99333		3.50333	0.0881844	0.0802218
L-3-1	HORVU.MOREX.r3.2HG0131510	20.88	20.9167		352-3-1	HORVU.MOREX.r3.2HG0131510	23.93	3.01333		3.52333	0.0869703
L-3-2	HORVU.MOREX.r3.2HG0131510	20.86			352-3-2	HORVU.MOREX.r3.2HG0131510	24.44	3.52333		4.03333	0.0610725
L-3-3	HORVU.MOREX.r3.2HG0131510	21.01			352-3-3	HORVU.MOREX.r3.2HG0131510	24.27	3.35333		3.86333	0.0687101	0.072251
