# Supplementary material for: Transcriptomic insights into grain size development in naked barley (Hordeum vulgare L. var. nudum Hook. f): based on weighted gene co-expression network analysis
Source: PeerJ. 2025 Aug 8;13:e19856. doi: 10.7717/peerj.19856 (PMC12338054; doi:10.7717/peerj.19856)
Supplement: Supplemental Information 10 [file peerj-13-19856-s010.xlsx]

## Sheet: Sheet1
Shenglibai	GL	GW	GT		Lalu Qingke	GL	GW	GT
early filling period	8.102	3.884	2.6		early filling period	6.527	2.486	2.091
	8.167	3.872	2.699			7.085	2.403	2.069
	8.311	3.877	2.699			6.823	2.322	2.047
mid filling period	10.051	5.57	3.858		mid filling period	8.586	4.113	3.191
	10.069	5.569	4.098			8.612	3.934	3.104
	10.055	5.56	3.833			8.904	4.107	3.117
late filling period	10.09	5.554	3.757		late filling period	10.224	4.654	3.387
	10.299	5.595	3.933			9.854	4.685	3.379
	10.318	5.662	3.9			10.276	4.671	3.371
