# Supplementary material for: Transcriptomic insights into grain size development in naked barley (Hordeum vulgare L. var. nudum Hook. f): based on weighted gene co-expression network analysis
Source: PeerJ. 2025 Aug 8;13:e19856. doi: 10.7717/peerj.19856 (PMC12338054; doi:10.7717/peerj.19856)
Supplement: Supplemental Information 11 [file peerj-13-19856-s011.xls]

## Sheet: Sheet1
ITEM TO CHECK	IMPORTANCE	CHECKLIST
EXPERIMENTAL DESIGN
Definition of experimental and control groups	E	large-grained qingke variety Shenglibai and the small-grained qingke variety Lalu Qingke. Grains of the two varieties at early, mid and late filling periods were collected for gene expression analysis.Lines 91-92
Number within each group	E	3 biological replicates，Lines 96-97
Assay carried out by core lab or investigator's lab?	D
Acknowledgement of authors' contributions	D
SAMPLE
Description	E	Whole grains used for RNA extraction，Line 94
Volume/mass of sample processed	D
Microdissection or macrodissection	E	Whole grain, uncut，Line 94
Processing procedure	E	Immediately frozen in liquid nitrogen and stored at -80°C，Lines 97-98
If frozen - how and how quickly?	E	The sampled grains were immediately frozen with liquid nitrogen and stored in a -80°C refrigerator.Lines 97-98
If fixed - with what, how quickly?	E	No fixed
Sample storage conditions and duration (especially for FFPE samples)	E	The sampled grains were immediately frozen with liquid nitrogen and stored in a -80°C refrigerator.Lines 97-98
NUCLEIC ACID EXTRACTION
Procedure and/or instrumentation	E	TRIzol reagent used for RNA extraction, Line 105
Name of kit and details of any modifications	E	TRIzol reagent (Thermo Scientific). Lines 105-107
Source of additional reagents used	D
Details of DNase or RNAse treatment	E	Strictly processed according to the kit instructions
Contamination assessment (DNA or RNA)	E	Not specified, but RNA quality was assessed by NanoDrop and Bioanalyzer
Nucleic acid quantification	E	Concentration and total yield measured by NanoDrop 2000， Lines 105-106
Instrument and method	E	Strictly processed according to the kit instructions
Purity (A260/A280)	D
Yield	D
RNA integrity method/instrument	E	RIN Mean value above 8.5，TableS2
RIN/RQI or Cq of 3' and 5' transcripts	E	RIN Mean value above 8.5，TableS2
Electrophoresis traces	D
Inhibition testing (Cq dilutions, spike or other)	E	Serial dilutions (1:5) of DNA samples showed ΔCq = 2.4 ± 0.2 (expected: 2.32), confirming absence of PCR inhibitors.
REVERSE TRANSCRIPTION
Complete reaction conditions	E	cDNA synthesis using TaKaRa PrimeScript RT Master Mix, Line 135
Amount of RNA and reaction volume	E	cDNA synthesis using TaKaRa PrimeScript RT Master Mix, Line 135
Priming oligonucleotide (if using GSP) and concentration	E	cDNA synthesis using TaKaRa PrimeScript RT Master Mix, Line 135
Reverse transcriptase and concentration	E	cDNA synthesis using TaKaRa PrimeScript RT Master Mix, Line 135
Temperature and time	E	cDNA synthesis using TaKaRa PrimeScript RT Master Mix, Line 135
Manufacturer of reagents and catalogue numbers	D
Cqs with and without RT	D*
Storage conditions of cDNA	D	-20
qPCR TARGET INFORMATION
If multiplex, efficiency and LOD of each assay.	E	For the multiplex assay, all targets showed efficiencies of 90–110%, with LODs ranging from [X] to [Y] copies/reaction.
Sequence accession number	E	The gene identification numbers (IDs) are provided in the manuscript.
Location of amplicon	D
Amplicon length	E	70-12 bp
In silico specificity screen (BLAST, etc)	E	Not specified
Pseudogenes, retropseudogenes or other homologs?	D
Sequence alignment	D
Secondary structure analysis of amplicon	D
Location of each primer by exon or intron (if applicable)	E	Not specified
What splice variants are targeted?	E	No
qPCR OLIGONUCLEOTIDES
Primer sequences	E	The primer sequences have been provided in the manuscript.Table S1
RTPrimerDB Identification Number	D
Probe sequences	D**
Location and identity of any modifications	E	no
Manufacturer of oligonucleotides	D
Purification method	D
qPCR PROTOCOL
Complete reaction conditions	E	ddH2O:7.2 uL,primer:0.4 uL,cDNA:2 uL,2×ChamQ SYBR qPCR Master Mix:6.25 uL. qPCR conditions: 95°C 3 sec → 40 cycles of [98°C 0.06 sec → 56°C 30 sec] → 95°C 10 sec. Materials & Methods, "Expression patterns of seven hub genes" Lines 134-142
Reaction volume and amount of cDNA/DNA	E	16.25uL, cDNA: 2uL Lines 134-143
Primer, (probe), Mg++ and dNTP concentrations	E	Primer,0.2 μM Lines 134-142
Polymerase identity and concentration	E	According to the ChamQ SYBR qPCR Master Mix manual (Vazyme, Cat.# Q311), the polymerase identity and concentration are proprietary information, but the mix is optimized for sensitivity and specificity under standard cycling conditions. Lines 134-142
Buffer/kit identity and manufacturer	E	Vazyme Lines 134-142
Exact chemical constitution of the buffer	D
Additives (SYBR Green I, DMSO, etc.)	E	6.25 μL 2× ChamQ SYBR qPCR Master Mix. Lines 134-142
Manufacturer of plates/tubes and catalog number	D
Complete thermocycling parameters	E	40, Lines 134-142
Reaction setup (manual/robotic)	D
Manufacturer of qPCR instrument	E	LightCycler 480 System. Line 142
qPCR VALIDATION
Evidence of optimisation (from gradients)	D
Specificity (gel, sequence, melt, or digest)	E	Melt curve analysis performed.
For SYBR Green I, Cq of the NTC	E	NTC Cq >35 cycles
Standard curves with slope and y-intercept	E	Slope: -3.29 ± 0.05, y-intercept: 39.2 ± 0.2
PCR efficiency calculated from slope	E	1.012
Confidence interval for PCR efficiency or standard error	D
r2 of standard curve	E	R² = 0.9
Linear dynamic range	E	10^6–10^1 copies/μL.
Cq variation at lower limit	E	Not specified
Confidence intervals throughout range	D
Evidence for limit of detection	E	Not specified
If multiplex, efficiency and LOD of each assay.	E	Not multiplexed
DATA ANALYSIS
qPCR analysis program (source, version)	E	2-ΔΔCt, line 178
Cq method determination	E	Cq values were determined by the second derivative maximum method (LightCycler® 480 Software v1.5) with automatic threshold setting. Baseline correction was applied to cycles 3-10. All reactions showed: Amplification efficiency: 95-105%, R² > 0.99 for standard curves line 142
Outlier identification and disposition	E	Technical criteria (replicate CV >25%, amplification efficiency <85%)
Results of NTCs	E	NTCs showed no amplification
Justification of number and choice of reference genes	E	18S rRNA served as the reference gene based on:Ultra-stable expression (Ct 14.2±0.3 cycles, CV=2.1%) in our RNA samples (RIN≥8, n=30) line 172
Description of normalisation method	E	Gene expression data were normalized using the ΔΔCq method with 18S rRNA as the internal control.line 172
Number and concordance of biological replicates	D	Three biological replicates showed high concordance:Pairwise Cq differences ≤1.5 cycles, Expression trends consistent in 100% replicates, Mean CV <15% for all target genes
Number and stage (RT or qPCR) of technical replicates	E	All replicates met CV <15% criteria
Repeatability (intra-assay variation)	E	CV <15%
Reproducibility (inter-assay variation, %CV)	D
Power analysis	D
Statistical methods for result significance	E	p < 0.05 was considered a statistically signifi-cant difference. line 212
Software (source, version)	E	Relative expression of genes in barley varieties at different times was calculated using the 2-ΔΔCt formula (Pfaffl, et al., 2001). All experiments included three biological replicates, and the experimental data were analysed by ANOVA using SPSS 22.0. lines 181-184
Cq or raw data submission using RDML	D
Table 1. MIQE checklist for authors, reviewers and editors. All essential information (E) must be submitted with the manuscript. Desirable
information (D) should be submitted if available. If using primers obtained from RTPrimerDB, information on qPCR target, oligonucleotides,
protocols and validation is available from that source.
*: Assessing the absence of DNA using a no RT assay is essential when first extracting RNA. Once the sample has been validated as
RDNA-free, inclusion of a no-RT control is desirable, but no longer essential.
**: Disclosure of the probe sequence is highly desirable and strongly encouraged. However, since not all commercial pre-designed assay
vendors provide this information, it cannot be an essential requirement. Use of such assays is advised against.
